# Supplementary material
Source: publisher figshare collection journal article supplement (https://acs.figshare.com/ndownloader/files/10295103)
Supplement: Supplementary file 1 [file 10295103]

 
data_1552246
 
_audit_creation_method            'SHELXL-2016/6'
_shelx_SHELXL_version_number      '2016/6'
_chemical_name_systematic         ?
_chemical_name_common             ?
_chemical_melting_point           ?
_chemical_formula_moiety          'C29 H34 N2 O3 Pd' 
_chemical_formula_sum             'C29 H34 N2 O3 Pd' 
_chemical_formula_weight          564.98

loop_
 _atom_type_symbol
 _atom_type_description
 _atom_type_scat_dispersion_real
 _atom_type_scat_dispersion_imag
 _atom_type_scat_source
 'C'  'C'   0.0033   0.0016
 'International Tables Vol C Tables 4.2.6.8 and 6.1.1.4'
 'H'  'H'   0.0000   0.0000
 'International Tables Vol C Tables 4.2.6.8 and 6.1.1.4'
 'N'  'N'   0.0061   0.0033
 'International Tables Vol C Tables 4.2.6.8 and 6.1.1.4'
 'O'  'O'   0.0106   0.0060
 'International Tables Vol C Tables 4.2.6.8 and 6.1.1.4'
 'Pd'  'Pd'  -0.9988   1.0072
 'International Tables Vol C Tables 4.2.6.8 and 6.1.1.4'
 
_space_group_crystal_system       monoclinic
_space_group_IT_number            14
_space_group_name_H-M_alt         'P 21/n'
_space_group_name_Hall            '-P 2yn'
 
_shelx_space_group_comment
;
The symmetry employed for this shelxl refinement is uniquely defined
by the following loop, which should always be used as a source of
symmetry information in preference to the above space-group names.
They are only intended as comments.
;
 
loop_
 _space_group_symop_operation_xyz
 'x, y, z'
 '-x+1/2, y+1/2, -z+1/2'
 '-x, -y, -z'
 'x-1/2, -y-1/2, z-1/2'
 
_cell_length_a                    13.169(6)
_cell_length_b                    13.674(6)
_cell_length_c                    14.980(6)
_cell_angle_alpha                 90
_cell_angle_beta                  100.599(6)
_cell_angle_gamma                 90
_cell_volume                      2651(2)
_cell_formula_units_Z             4
_cell_measurement_temperature     93
_cell_measurement_reflns_used     7929
_cell_measurement_theta_min       2.2
_cell_measurement_theta_max       31.0
 
_exptl_crystal_description        'Block'
_exptl_crystal_colour             'Colorless'
_exptl_crystal_density_meas       ?
_exptl_crystal_density_method     ?
_exptl_crystal_density_diffrn     1.415          
_exptl_crystal_F_000              1168
_exptl_transmission_factor_min    ?
_exptl_transmission_factor_max    ?
_exptl_crystal_size_max           0.200
_exptl_crystal_size_mid           0.100
_exptl_crystal_size_min           0.100
_exptl_absorpt_coefficient_mu     0.732
_shelx_estimated_absorpt_T_min    0.867
_shelx_estimated_absorpt_T_max    0.930
_exptl_absorpt_correction_type    'Multi-scan'
_exptl_absorpt_correction_T_max   1.000
_exptl_absorpt_correction_T_min   0.846
_exptl_absorpt_process_details    'Jacobson, R. (1998) Private communication'
_exptl_absorpt_special_details    ?
_diffrn_ambient_temperature       93
_diffrn_radiation_wavelength      0.71075
_diffrn_radiation_type            MoK\a
_diffrn_source                    ?
_diffrn_measurement_device_type   'Rigaku Saturn724 CCD' 
_diffrn_measurement_method        'omega scans'  
_diffrn_detector_area_resol_mean  28.5714 
_diffrn_reflns_number             18153
_diffrn_reflns_av_unetI/netI      0.0612
_diffrn_reflns_av_R_equivalents   0.0650
_diffrn_reflns_limit_h_min        -16
_diffrn_reflns_limit_h_max        16
_diffrn_reflns_limit_k_min        -16
_diffrn_reflns_limit_k_max        13
_diffrn_reflns_limit_l_min        -16
_diffrn_reflns_limit_l_max        18
_diffrn_reflns_theta_min          2.167
_diffrn_reflns_theta_max          25.999
_diffrn_reflns_theta_full         25.242
_diffrn_measured_fraction_theta_max   0.997
_diffrn_measured_fraction_theta_full  0.997
_diffrn_reflns_Laue_measured_fraction_max    0.997
_diffrn_reflns_Laue_measured_fraction_full   0.997
_diffrn_reflns_point_group_measured_fraction_max   0.997
_diffrn_reflns_point_group_measured_fraction_full  0.997
_reflns_number_total              5203
_reflns_number_gt                 4627
_reflns_threshold_expression      'I > 2\s(I)'
_reflns_Friedel_coverage          0.000
_reflns_Friedel_fraction_max      .
_reflns_Friedel_fraction_full     .
 
_reflns_special_details
;
 Reflections were merged by SHELXL according to the crystal
 class for the calculation of statistics and refinement.
 
 _reflns_Friedel_fraction is defined as the number of unique
 Friedel pairs measured divided by the number that would be
 possible theoretically, ignoring centric projections and
 systematic absences.
;
 
_computing_data_collection        'RIGAKU CrystalClear' 
_computing_cell_refinement        'RIGAKU CrystalClear' 
_computing_data_reduction         'RIGAKU CrystalClear' 
_computing_structure_solution     'SHELXLT-2014/4 (Sheldrick, 2014)'
_computing_structure_refinement   'SHELXL-2016/6 (Sheldrick, 2016)' 
_computing_molecular_graphics     'Mercury' 
_computing_publication_material   'Yadokari-XG (Wakita, Nemoto, et al.)'
_refine_special_details           ?
_refine_ls_structure_factor_coef  Fsqd
_refine_ls_matrix_type            full
_refine_ls_weighting_scheme       calc
_refine_ls_weighting_details
'w=1/[\s^2^(Fo^2^)+(0.0176P)^2^+5.8694P] where P=(Fo^2^+2Fc^2^)/3'
_atom_sites_solution_primary      ?
_atom_sites_solution_secondary    ?
_atom_sites_solution_hydrogens    geom
_refine_ls_hydrogen_treatment     constr
_refine_ls_extinction_method      none
_refine_ls_extinction_coef        .
_refine_ls_number_reflns          5203
_refine_ls_number_parameters      323
_refine_ls_number_restraints      0
_refine_ls_R_factor_all           0.0623
_refine_ls_R_factor_gt            0.0529
_refine_ls_wR_factor_ref          0.0956
_refine_ls_wR_factor_gt           0.0915
_refine_ls_goodness_of_fit_ref    1.136
_refine_ls_restrained_S_all       1.136
_refine_ls_shift/su_max           0.030
_refine_ls_shift/su_mean          0.001
 
loop_
 _atom_site_label
 _atom_site_type_symbol
 _atom_site_fract_x
 _atom_site_fract_y
 _atom_site_fract_z
 _atom_site_U_iso_or_equiv
 _atom_site_adp_type
 _atom_site_occupancy
 _atom_site_site_symmetry_order  
 _atom_site_calc_flag
 _atom_site_refinement_flags_posn
 _atom_site_refinement_flags_adp
 _atom_site_refinement_flags_occupancy
 _atom_site_disorder_assembly
 _atom_site_disorder_group
Pd1 Pd 0.33105(2) 0.60593(2) 0.37376(2) 0.01298(9) Uani 1 1 d . . . . .
O3 O 0.3973(2) 0.66629(19) 0.27260(18) 0.0188(6) Uani 1 1 d . . . . .
O1 O 0.3438(2) 0.74380(19) 0.44019(18) 0.0180(6) Uani 1 1 d . . . . .
O2 O 0.3240(2) 0.8123(2) 0.57068(19) 0.0206(6) Uani 1 1 d . . . . .
N1 N 0.2556(2) 0.4010(2) 0.3157(2) 0.0149(7) Uani 1 1 d . . . . .
N2 N 0.3682(2) 0.4580(2) 0.2417(2) 0.0134(7) Uani 1 1 d . . . . .
C7 C 0.3153(3) 0.4814(3) 0.3095(3) 0.0134(8) Uani 1 1 d . . . . .
C2 C 0.3289(3) 0.6363(3) 0.5630(3) 0.0174(9) Uani 1 1 d . . . . .
C18 C 0.1793(3) 0.3901(3) 0.3732(3) 0.0160(8) Uani 1 1 d . . . . .
C5 C 0.3323(3) 0.7347(3) 0.5198(3) 0.0164(9) Uani 1 1 d . . . . .
C1 C 0.2765(3) 0.5677(3) 0.4868(3) 0.0151(8) Uani 1 1 d . . . . .
H1 H 0.200533 0.575460 0.476782 0.018 Uiso 1 1 calc R U . . .
H2 H 0.293769 0.498665 0.502918 0.018 Uiso 1 1 calc R U . . .
C16 C 0.4525(3) 0.6169(3) 0.2242(3) 0.0165(8) Uani 1 1 d . . . . .
C9 C 0.3436(3) 0.3626(3) 0.2104(3) 0.0165(9) Uani 1 1 d . . . . .
C4 C 0.4439(3) 0.6060(3) 0.5945(3) 0.0242(9) Uani 1 1 d . . . . .
H6 H 0.478854 0.605453 0.542117 0.036 Uiso 1 1 calc R U . . .
H7 H 0.447074 0.540615 0.621571 0.036 Uiso 1 1 calc R U . . .
H8 H 0.478124 0.652996 0.639616 0.036 Uiso 1 1 calc R U . . .
C19 C 0.2025(3) 0.3293(3) 0.4490(3) 0.0181(9) Uani 1 1 d . . . . .
C15 C 0.5287(3) 0.6661(3) 0.1860(3) 0.0233(10) Uani 1 1 d . . . . .
H17 H 0.540304 0.733648 0.198665 0.028 Uiso 1 1 calc R U . . .
C10 C 0.3967(3) 0.3192(3) 0.1448(3) 0.0204(9) Uani 1 1 d . . . . .
H13 H 0.378677 0.255427 0.122040 0.024 Uiso 1 1 calc R U . . .
C17 C 0.4406(3) 0.5159(3) 0.2051(3) 0.0144(8) Uani 1 1 d . . . . .
C8 C 0.2718(3) 0.3285(3) 0.2558(3) 0.0169(9) Uani 1 1 d . . . . .
H12 H 0.238707 0.266594 0.248112 0.020 Uiso 1 1 calc R U . . .
C3 C 0.2758(4) 0.6380(3) 0.6456(3) 0.0250(10) Uani 1 1 d . . . . .
H3 H 0.315837 0.678855 0.693199 0.038 Uiso 1 1 calc R U . . .
H4 H 0.271476 0.571324 0.668447 0.038 Uiso 1 1 calc R U . . .
H5 H 0.206056 0.665068 0.627954 0.038 Uiso 1 1 calc R U . . .
C20 C 0.1264(3) 0.3188(3) 0.5020(3) 0.0243(10) Uani 1 1 d . . . . .
H18 H 0.139577 0.278881 0.554753 0.029 Uiso 1 1 calc R U . . .
C6 C 0.3261(4) 0.9069(3) 0.5270(3) 0.0277(10) Uani 1 1 d . . . . .
H9 H 0.390924 0.914006 0.504370 0.042 Uiso 1 1 calc R U . . .
H10 H 0.321033 0.958858 0.571104 0.042 Uiso 1 1 calc R U . . .
H11 H 0.267682 0.911806 0.476205 0.042 Uiso 1 1 calc R U . . .
C24 C 0.3052(3) 0.2761(3) 0.4756(3) 0.0245(10) Uani 1 1 d . . . . .
H21 H 0.353357 0.303528 0.437518 0.029 Uiso 1 1 calc R U . . .
C21 C 0.0321(3) 0.3657(3) 0.4788(3) 0.0265(11) Uani 1 1 d . . . . .
H19 H -0.018859 0.357446 0.515598 0.032 Uiso 1 1 calc R U . . .
C12 C 0.4962(3) 0.4690(3) 0.1446(3) 0.0196(9) Uani 1 1 d . . . . .
C14 C 0.5865(4) 0.6197(3) 0.1314(3) 0.0286(11) Uani 1 1 d . . . . .
H16 H 0.638347 0.654967 0.108499 0.034 Uiso 1 1 calc R U . . .
C22 C 0.0115(3) 0.4244(3) 0.4027(3) 0.0259(10) Uani 1 1 d . . . . .
H20 H -0.053502 0.456365 0.387966 0.031 Uiso 1 1 calc R U . . .
C23 C 0.0841(3) 0.4376(3) 0.3472(3) 0.0195(9) Uani 1 1 d . . . . .
C27 C 0.0592(3) 0.4963(3) 0.2602(3) 0.0262(10) Uani 1 1 d . . . . .
H28 H 0.125054 0.524981 0.247818 0.031 Uiso 1 1 calc R U . . .
C11 C 0.4714(3) 0.3691(3) 0.1162(3) 0.0239(10) Uani 1 1 d . . . . .
H14 H 0.509556 0.338450 0.075991 0.029 Uiso 1 1 calc R U . . .
C26 C 0.2918(4) 0.1669(3) 0.4530(4) 0.0355(12) Uani 1 1 d . . . . .
H25 H 0.244562 0.137759 0.488952 0.053 Uiso 1 1 calc R U . . .
H26 H 0.359078 0.134193 0.467339 0.053 Uiso 1 1 calc R U . . .
H27 H 0.263323 0.159009 0.388189 0.053 Uiso 1 1 calc R U . . .
C13 C 0.5703(3) 0.5223(3) 0.1094(3) 0.0275(11) Uani 1 1 d . . . . .
H15 H 0.609599 0.491413 0.070265 0.033 Uiso 1 1 calc R U . . .
C25 C 0.3552(4) 0.2920(4) 0.5750(4) 0.0434(14) Uani 1 1 d . . . . .
H22 H 0.361513 0.362242 0.587629 0.065 Uiso 1 1 calc R U . . .
H23 H 0.423922 0.261935 0.586718 0.065 Uiso 1 1 calc R U . . .
H24 H 0.312154 0.261882 0.614309 0.065 Uiso 1 1 calc R U . . .
C29 C 0.0153(4) 0.4284(4) 0.1807(3) 0.0398(13) Uani 1 1 d . . . . .
H32 H 0.063955 0.374863 0.177459 0.060 Uiso 1 1 calc R U . . .
H33 H 0.004877 0.465605 0.123793 0.060 Uiso 1 1 calc R U . . .
H34 H -0.050899 0.401512 0.190055 0.060 Uiso 1 1 calc R U . . .
C28 C -0.0169(4) 0.5799(4) 0.2639(4) 0.0461(15) Uani 1 1 d . . . . .
H29 H -0.085440 0.553010 0.265702 0.069 Uiso 1 1 calc R U . . .
H30 H -0.020541 0.621119 0.209844 0.069 Uiso 1 1 calc R U . . .
H31 H 0.006566 0.619271 0.318445 0.069 Uiso 1 1 calc R U . . .
 
loop_
 _atom_site_aniso_label
 _atom_site_aniso_U_11
 _atom_site_aniso_U_22
 _atom_site_aniso_U_33
 _atom_site_aniso_U_23
 _atom_site_aniso_U_13
 _atom_site_aniso_U_12
Pd1 0.01370(15) 0.01115(16) 0.01439(16) 0.00011(13) 0.00336(11) 0.00008(13)
O3 0.0230(15) 0.0127(15) 0.0226(16) 0.0047(12) 0.0096(13) 0.0009(12)
O1 0.0220(15) 0.0129(15) 0.0191(15) -0.0019(11) 0.0040(13) 0.0001(12)
O2 0.0230(16) 0.0162(15) 0.0222(16) -0.0068(12) 0.0031(13) -0.0027(13)
N1 0.0164(17) 0.0117(17) 0.0166(17) -0.0015(14) 0.0029(14) 0.0005(14)
N2 0.0144(17) 0.0089(17) 0.0161(17) 0.0012(13) 0.0009(14) 0.0026(13)
C7 0.0094(18) 0.016(2) 0.014(2) 0.0013(16) 0.0007(16) 0.0008(16)
C2 0.016(2) 0.018(2) 0.018(2) -0.0013(16) 0.0050(17) -0.0023(17)
C18 0.0118(18) 0.014(2) 0.023(2) -0.0045(17) 0.0059(16) -0.0041(17)
C5 0.0084(19) 0.022(2) 0.018(2) -0.0036(17) 0.0004(16) -0.0035(16)
C1 0.016(2) 0.012(2) 0.019(2) -0.0021(16) 0.0063(17) -0.0025(16)
C16 0.020(2) 0.016(2) 0.014(2) 0.0040(16) 0.0032(17) 0.0035(17)
C9 0.015(2) 0.015(2) 0.018(2) -0.0015(16) -0.0002(17) 0.0008(16)
C4 0.022(2) 0.026(2) 0.024(2) 0.004(2) 0.0012(18) -0.004(2)
C19 0.017(2) 0.016(2) 0.022(2) -0.0004(17) 0.0041(17) -0.0053(17)
C15 0.029(2) 0.016(2) 0.027(2) 0.0036(18) 0.010(2) -0.0012(18)
C10 0.021(2) 0.019(2) 0.021(2) -0.0040(18) 0.0032(18) 0.0036(18)
C17 0.0117(19) 0.018(2) 0.014(2) 0.0041(16) 0.0021(16) 0.0017(16)
C8 0.019(2) 0.012(2) 0.019(2) 0.0002(16) 0.0031(17) -0.0007(16)
C3 0.030(2) 0.028(3) 0.018(2) -0.0034(18) 0.010(2) -0.007(2)
C20 0.029(2) 0.021(2) 0.024(2) 0.0032(18) 0.007(2) -0.011(2)
C6 0.032(3) 0.015(2) 0.035(3) -0.0054(19) 0.003(2) 0.0001(19)
C24 0.023(2) 0.023(2) 0.026(2) 0.0081(19) 0.000(2) -0.0035(19)
C21 0.024(2) 0.030(3) 0.031(3) -0.006(2) 0.018(2) -0.011(2)
C12 0.022(2) 0.019(2) 0.018(2) -0.0023(17) 0.0048(18) 0.0015(18)
C14 0.031(3) 0.028(3) 0.032(3) 0.005(2) 0.019(2) -0.007(2)
C22 0.016(2) 0.020(2) 0.042(3) -0.010(2) 0.007(2) -0.0030(18)
C23 0.018(2) 0.015(2) 0.024(2) -0.0026(17) 0.0024(18) -0.0026(17)
C27 0.015(2) 0.029(3) 0.032(3) 0.004(2) -0.001(2) -0.0006(19)
C11 0.022(2) 0.024(3) 0.028(2) -0.0064(19) 0.011(2) 0.0041(19)
C26 0.035(3) 0.023(3) 0.048(3) 0.006(2) 0.007(2) 0.009(2)
C13 0.027(2) 0.032(3) 0.028(3) -0.002(2) 0.015(2) 0.000(2)
C25 0.045(3) 0.034(3) 0.044(3) 0.011(2) -0.012(3) -0.002(2)
C29 0.051(3) 0.035(3) 0.029(3) -0.008(2) -0.005(2) 0.021(3)
C28 0.057(4) 0.027(3) 0.044(3) -0.011(2) -0.019(3) 0.014(3)
 
_geom_special_details
;
 All esds (except the esd in the dihedral angle between two l.s. planes)
 are estimated using the full covariance matrix.  The cell esds are taken
 into account individually in the estimation of esds in distances, angles
 and torsion angles; correlations between esds in cell parameters are only
 used when they are defined by crystal symmetry.  An approximate (isotropic)
 treatment of cell esds is used for estimating esds involving l.s. planes.
;
 
loop_
 _geom_bond_atom_site_label_1
 _geom_bond_atom_site_label_2
 _geom_bond_distance
 _geom_bond_site_symmetry_2
 _geom_bond_publ_flag
Pd1 C7 1.949(4) . ?
Pd1 C1 2.026(4) . ?
Pd1 O3 2.056(3) . ?
Pd1 O1 2.124(3) . ?
O3 C16 1.305(5) . ?
O1 C5 1.236(5) . ?
O2 C5 1.322(5) . ?
O2 C6 1.453(5) . ?
N1 C7 1.364(5) . ?
N1 C8 1.380(5) . ?
N1 C18 1.446(5) . ?
N2 C7 1.370(5) . ?
N2 C9 1.404(5) . ?
N2 C17 1.424(5) . ?
C2 C5 1.497(6) . ?
C2 C3 1.529(5) . ?
C2 C1 1.539(5) . ?
C2 C4 1.558(6) . ?
C18 C19 1.395(6) . ?
C18 C23 1.402(6) . ?
C16 C15 1.413(6) . ?
C16 C17 1.413(6) . ?
C9 C8 1.345(6) . ?
C9 C10 1.434(5) . ?
C19 C20 1.395(6) . ?
C19 C24 1.523(6) . ?
C15 C14 1.372(6) . ?
C10 C11 1.332(6) . ?
C17 C12 1.419(5) . ?
C20 C21 1.385(6) . ?
C24 C25 1.529(6) . ?
C24 C26 1.534(6) . ?
C21 C22 1.380(6) . ?
C12 C13 1.397(6) . ?
C12 C11 1.449(6) . ?
C14 C13 1.378(6) . ?
C22 C23 1.390(6) . ?
C23 C27 1.514(6) . ?
C27 C28 1.528(6) . ?
C27 C29 1.536(6) . ?
 
loop_
 _geom_angle_atom_site_label_1
 _geom_angle_atom_site_label_2
 _geom_angle_atom_site_label_3
 _geom_angle
 _geom_angle_site_symmetry_1
 _geom_angle_site_symmetry_3
 _geom_angle_publ_flag
C7 Pd1 C1 99.52(16) . . ?
C7 Pd1 O3 90.44(14) . . ?
C1 Pd1 O3 169.63(13) . . ?
C7 Pd1 O1 177.91(13) . . ?
C1 Pd1 O1 81.21(13) . . ?
O3 Pd1 O1 88.93(11) . . ?
C16 O3 Pd1 123.9(2) . . ?
C5 O1 Pd1 110.5(3) . . ?
C5 O2 C6 116.4(3) . . ?
C7 N1 C8 112.0(3) . . ?
C7 N1 C18 126.6(3) . . ?
C8 N1 C18 121.4(3) . . ?
C7 N2 C9 110.3(3) . . ?
C7 N2 C17 128.5(3) . . ?
C9 N2 C17 121.1(3) . . ?
N1 C7 N2 103.9(3) . . ?
N1 C7 Pd1 132.9(3) . . ?
N2 C7 Pd1 123.2(3) . . ?
C5 C2 C3 113.0(3) . . ?
C5 C2 C1 105.9(3) . . ?
C3 C2 C1 113.6(3) . . ?
C5 C2 C4 105.3(3) . . ?
C3 C2 C4 108.8(3) . . ?
C1 C2 C4 109.9(3) . . ?
C19 C18 C23 123.5(4) . . ?
C19 C18 N1 118.3(3) . . ?
C23 C18 N1 118.1(4) . . ?
O1 C5 O2 120.9(4) . . ?
O1 C5 C2 121.7(4) . . ?
O2 C5 C2 117.4(3) . . ?
C2 C1 Pd1 106.4(3) . . ?
O3 C16 C15 119.2(4) . . ?
O3 C16 C17 124.4(4) . . ?
C15 C16 C17 116.4(4) . . ?
C8 C9 N2 107.0(3) . . ?
C8 C9 C10 132.8(4) . . ?
N2 C9 C10 120.2(4) . . ?
C20 C19 C18 116.9(4) . . ?
C20 C19 C24 119.9(4) . . ?
C18 C19 C24 123.2(4) . . ?
C14 C15 C16 122.3(4) . . ?
C11 C10 C9 119.3(4) . . ?
C16 C17 C12 121.3(4) . . ?
C16 C17 N2 121.5(3) . . ?
C12 C17 N2 117.1(3) . . ?
C9 C8 N1 106.7(3) . . ?
C21 C20 C19 121.0(4) . . ?
C19 C24 C25 112.9(4) . . ?
C19 C24 C26 110.3(4) . . ?
C25 C24 C26 111.4(4) . . ?
C22 C21 C20 120.5(4) . . ?
C13 C12 C17 118.9(4) . . ?
C13 C12 C11 121.1(4) . . ?
C17 C12 C11 119.9(4) . . ?
C15 C14 C13 120.7(4) . . ?
C21 C22 C23 121.2(4) . . ?
C22 C23 C18 116.9(4) . . ?
C22 C23 C27 121.3(4) . . ?
C18 C23 C27 121.7(4) . . ?
C23 C27 C28 113.9(4) . . ?
C23 C27 C29 109.8(4) . . ?
C28 C27 C29 108.9(4) . . ?
C10 C11 C12 121.9(4) . . ?
C14 C13 C12 120.2(4) . . ?
 
loop_
 _geom_torsion_atom_site_label_1
 _geom_torsion_atom_site_label_2
 _geom_torsion_atom_site_label_3
 _geom_torsion_atom_site_label_4
 _geom_torsion
 _geom_torsion_site_symmetry_1
 _geom_torsion_site_symmetry_2
 _geom_torsion_site_symmetry_3
 _geom_torsion_site_symmetry_4
 _geom_torsion_publ_flag
C8 N1 C7 N2 1.4(4) . . . . ?
C18 N1 C7 N2 -175.5(3) . . . . ?
C8 N1 C7 Pd1 -179.3(3) . . . . ?
C18 N1 C7 Pd1 3.8(6) . . . . ?
C9 N2 C7 N1 -2.6(4) . . . . ?
C17 N2 C7 N1 178.7(3) . . . . ?
C9 N2 C7 Pd1 178.1(3) . . . . ?
C17 N2 C7 Pd1 -0.6(5) . . . . ?
C7 N1 C18 C19 -107.3(5) . . . . ?
C8 N1 C18 C19 76.0(5) . . . . ?
C7 N1 C18 C23 75.6(5) . . . . ?
C8 N1 C18 C23 -101.0(4) . . . . ?
Pd1 O1 C5 O2 -171.3(3) . . . . ?
Pd1 O1 C5 C2 9.6(4) . . . . ?
C6 O2 C5 O1 1.7(5) . . . . ?
C6 O2 C5 C2 -179.1(3) . . . . ?
C3 C2 C5 O1 -158.6(4) . . . . ?
C1 C2 C5 O1 -33.7(5) . . . . ?
C4 C2 C5 O1 82.7(4) . . . . ?
C3 C2 C5 O2 22.2(5) . . . . ?
C1 C2 C5 O2 147.1(3) . . . . ?
C4 C2 C5 O2 -96.4(4) . . . . ?
C5 C2 C1 Pd1 39.3(3) . . . . ?
C3 C2 C1 Pd1 163.8(3) . . . . ?
C4 C2 C1 Pd1 -74.0(3) . . . . ?
Pd1 O3 C16 C15 -153.1(3) . . . . ?
Pd1 O3 C16 C17 27.9(5) . . . . ?
C7 N2 C9 C8 2.8(4) . . . . ?
C17 N2 C9 C8 -178.4(3) . . . . ?
C7 N2 C9 C10 -174.6(3) . . . . ?
C17 N2 C9 C10 4.2(5) . . . . ?
C23 C18 C19 C20 -1.9(6) . . . . ?
N1 C18 C19 C20 -178.8(3) . . . . ?
C23 C18 C19 C24 178.6(4) . . . . ?
N1 C18 C19 C24 1.7(6) . . . . ?
O3 C16 C15 C14 -177.3(4) . . . . ?
C17 C16 C15 C14 1.7(6) . . . . ?
C8 C9 C10 C11 -174.6(4) . . . . ?
N2 C9 C10 C11 2.0(6) . . . . ?
O3 C16 C17 C12 173.7(4) . . . . ?
C15 C16 C17 C12 -5.3(6) . . . . ?
O3 C16 C17 N2 -2.7(6) . . . . ?
C15 C16 C17 N2 178.3(3) . . . . ?
C7 N2 C17 C16 -12.8(6) . . . . ?
C9 N2 C17 C16 168.7(4) . . . . ?
C7 N2 C17 C12 170.7(4) . . . . ?
C9 N2 C17 C12 -7.9(5) . . . . ?
N2 C9 C8 N1 -1.9(4) . . . . ?
C10 C9 C8 N1 175.1(4) . . . . ?
C7 N1 C8 C9 0.3(4) . . . . ?
C18 N1 C8 C9 177.4(3) . . . . ?
C18 C19 C20 C21 1.0(6) . . . . ?
C24 C19 C20 C21 -179.5(4) . . . . ?
C20 C19 C24 C25 -50.4(5) . . . . ?
C18 C19 C24 C25 129.1(4) . . . . ?
C20 C19 C24 C26 74.9(5) . . . . ?
C18 C19 C24 C26 -105.6(5) . . . . ?
C19 C20 C21 C22 -0.3(7) . . . . ?
C16 C17 C12 C13 5.4(6) . . . . ?
N2 C17 C12 C13 -178.0(4) . . . . ?
C16 C17 C12 C11 -171.0(4) . . . . ?
N2 C17 C12 C11 5.6(6) . . . . ?
C16 C15 C14 C13 1.7(7) . . . . ?
C20 C21 C22 C23 0.4(7) . . . . ?
C21 C22 C23 C18 -1.2(6) . . . . ?
C21 C22 C23 C27 175.8(4) . . . . ?
C19 C18 C23 C22 2.0(6) . . . . ?
N1 C18 C23 C22 178.8(4) . . . . ?
C19 C18 C23 C27 -174.9(4) . . . . ?
N1 C18 C23 C27 1.9(6) . . . . ?
C22 C23 C27 C28 31.9(6) . . . . ?
C18 C23 C27 C28 -151.3(4) . . . . ?
C22 C23 C27 C29 -90.5(5) . . . . ?
C18 C23 C27 C29 86.2(5) . . . . ?
C9 C10 C11 C12 -4.3(6) . . . . ?
C13 C12 C11 C10 -175.9(4) . . . . ?
C17 C12 C11 C10 0.4(6) . . . . ?
C15 C14 C13 C12 -1.7(7) . . . . ?
C17 C12 C13 C14 -1.9(7) . . . . ?
C11 C12 C13 C14 174.5(4) . . . . ?
 
_refine_diff_density_max    0.544
_refine_diff_density_min   -0.592
_refine_diff_density_rms    0.101

_shelx_res_file
;
TITL PIzQOMMA_a.res in P2(1)/n
    PIzQOMMA.res
    created by SHELXL-2016/6 at 09:52:32 on 01-May-2017
REM  Yadorkari-X generated
CELL 0.71075 13.1690 13.6740 14.9800 90.0000 100.5990 90.0000
ZERR 4.0 0.0060 0.0060 0.0060 0.0000 0.0060 0.0000
LATT 1
SYMM 1/2-X, 1/2+Y, 1/2-Z
REM  SPGR P21/n monoclinic
SFAC C H N O Pd
UNIT 116 136 8 12 4
SIZE 0.10 0.20 0.10
TEMP -180.0
L.S. 1
FMAP 2
PLAN -20
ACTA
CONF
LIST 4
WPDB -1
MERG 2
OMIT -10.000000 52.000000
OMIT    1    0    1
OMIT    7    4    7
OMIT   -1    1    1

WGHT    0.017600    5.869400
FVAR       1.74568
PD1   5    0.331046    0.605930    0.373764    11.00000    0.01370    0.01115 =
         0.01439    0.00011    0.00336    0.00008
O3    4    0.397334    0.666295    0.272599    11.00000    0.02304    0.01269 =
         0.02264    0.00474    0.00963    0.00091
O1    4    0.343779    0.743803    0.440193    11.00000    0.02201    0.01294 =
         0.01908   -0.00188    0.00397    0.00009
O2    4    0.324035    0.812265    0.570676    11.00000    0.02297    0.01622 =
         0.02224   -0.00679    0.00312   -0.00271
N1    3    0.255646    0.401015    0.315714    11.00000    0.01637    0.01166 =
         0.01661   -0.00151    0.00287    0.00047
N2    3    0.368178    0.458005    0.241742    11.00000    0.01438    0.00885 =
         0.01615    0.00125    0.00086    0.00263
C7    1    0.315319    0.481380    0.309501    11.00000    0.00942    0.01636 =
         0.01375    0.00130    0.00074    0.00078
C2    1    0.328864    0.636316    0.562959    11.00000    0.01633    0.01811 =
         0.01836   -0.00133    0.00496   -0.00227
C18   1    0.179295    0.390106    0.373168    11.00000    0.01181    0.01449 =
         0.02270   -0.00449    0.00585   -0.00410
C5    1    0.332339    0.734729    0.519838    11.00000    0.00842    0.02195 =
         0.01815   -0.00364    0.00037   -0.00351
C1    1    0.276526    0.567674    0.486805    11.00000    0.01564    0.01188 =
         0.01909   -0.00214    0.00626   -0.00245
AFIX  23
H1    2    0.200533    0.575460    0.476782    11.00000   -1.20000
H2    2    0.293769    0.498665    0.502918    11.00000   -1.20000
AFIX   0
C16   1    0.452483    0.616902    0.224153    11.00000    0.01986    0.01590 =
         0.01366    0.00405    0.00319    0.00350
C9    1    0.343629    0.362560    0.210392    11.00000    0.01450    0.01534 =
         0.01834   -0.00151   -0.00025    0.00084
C4    1    0.443892    0.606038    0.594489    11.00000    0.02160    0.02644 =
         0.02357    0.00389    0.00118   -0.00383
AFIX 137
H6    2    0.478854    0.605453    0.542117    11.00000   -1.50000
H7    2    0.447074    0.540615    0.621571    11.00000   -1.50000
H8    2    0.478124    0.652996    0.639616    11.00000   -1.50000
AFIX   0
C19   1    0.202452    0.329309    0.448983    11.00000    0.01688    0.01560 =
         0.02196   -0.00044    0.00406   -0.00535
C15   1    0.528708    0.666066    0.186028    11.00000    0.02934    0.01554 =
         0.02690    0.00362    0.01032   -0.00117
AFIX  43
H17   2    0.540304    0.733648    0.198665    11.00000   -1.20000
AFIX   0
C10   1    0.396663    0.319166    0.144828    11.00000    0.02095    0.01875 =
         0.02123   -0.00396    0.00317    0.00358
AFIX  43
H13   2    0.378677    0.255427    0.122040    11.00000   -1.20000
AFIX   0
C17   1    0.440595    0.515871    0.205139    11.00000    0.01169    0.01779 =
         0.01363    0.00406    0.00209    0.00174
C8    1    0.271839    0.328534    0.255804    11.00000    0.01906    0.01214 =
         0.01940    0.00020    0.00312   -0.00075
AFIX  43
H12   2    0.238707    0.266594    0.248112    11.00000   -1.20000
AFIX   0
C3    1    0.275794    0.638046    0.645554    11.00000    0.03046    0.02840 =
         0.01823   -0.00335    0.00972   -0.00722
AFIX 137
H3    2    0.315837    0.678855    0.693199    11.00000   -1.50000
H4    2    0.271476    0.571324    0.668447    11.00000   -1.50000
H5    2    0.206056    0.665068    0.627954    11.00000   -1.50000
AFIX   0
C20   1    0.126428    0.318806    0.501986    11.00000    0.02866    0.02078 =
         0.02426    0.00320    0.00727   -0.01097
AFIX  43
H18   2    0.139577    0.278881    0.554753    11.00000   -1.20000
AFIX   0
C6    1    0.326085    0.906935    0.527039    11.00000    0.03181    0.01497 =
         0.03516   -0.00542    0.00328    0.00014
AFIX 137
H9    2    0.390924    0.914006    0.504370    11.00000   -1.50000
H10   2    0.321033    0.958858    0.571104    11.00000   -1.50000
H11   2    0.267682    0.911806    0.476205    11.00000   -1.50000
AFIX   0
C24   1    0.305227    0.276136    0.475577    11.00000    0.02282    0.02287 =
         0.02615    0.00815    0.00031   -0.00348
AFIX  13
H21   2    0.353357    0.303528    0.437518    11.00000   -1.20000
AFIX   0
C21   1    0.032081    0.365721    0.478811    11.00000    0.02386    0.02968 =
         0.03074   -0.00597    0.01795   -0.01054
AFIX  43
H19   2   -0.018859    0.357446    0.515598    11.00000   -1.20000
AFIX   0
C12   1    0.496211    0.468981    0.144623    11.00000    0.02187    0.01917 =
         0.01811   -0.00233    0.00479    0.00146
C14   1    0.586548    0.619654    0.131417    11.00000    0.03080    0.02823 =
         0.03166    0.00482    0.01892   -0.00742
AFIX  43
H16   2    0.638347    0.654967    0.108499    11.00000   -1.20000
AFIX   0
C22   1    0.011482    0.424408    0.402683    11.00000    0.01635    0.02023 =
         0.04152   -0.00974    0.00673   -0.00304
AFIX  43
H20   2   -0.053502    0.456365    0.387966    11.00000   -1.20000
AFIX   0
C23   1    0.084091    0.437599    0.347163    11.00000    0.01841    0.01499 =
         0.02444   -0.00258    0.00237   -0.00261
C27   1    0.059182    0.496253    0.260161    11.00000    0.01503    0.02909 =
         0.03235    0.00396   -0.00148   -0.00058
AFIX  13
H28   2    0.125054    0.524981    0.247818    11.00000   -1.20000
AFIX   0
C11   1    0.471413    0.369144    0.116197    11.00000    0.02224    0.02423 =
         0.02779   -0.00638    0.01117    0.00415
AFIX  43
H14   2    0.509556    0.338450    0.075991    11.00000   -1.20000
AFIX   0
C26   1    0.291838    0.166907    0.452972    11.00000    0.03525    0.02275 =
         0.04800    0.00590    0.00658    0.00904
AFIX 137
H25   2    0.244562    0.137759    0.488952    11.00000   -1.50000
H26   2    0.359078    0.134193    0.467339    11.00000   -1.50000
H27   2    0.263323    0.159009    0.388189    11.00000   -1.50000
AFIX   0
C13   1    0.570299    0.522309    0.109442    11.00000    0.02683    0.03184 =
         0.02763   -0.00239    0.01463    0.00042
AFIX  43
H15   2    0.609599    0.491413    0.070265    11.00000   -1.20000
AFIX   0
C25   1    0.355186    0.291969    0.574976    11.00000    0.04481    0.03418 =
         0.04361    0.01086   -0.01201   -0.00162
AFIX 137
H22   2    0.361513    0.362242    0.587629    11.00000   -1.50000
H23   2    0.423922    0.261935    0.586718    11.00000   -1.50000
H24   2    0.312154    0.261882    0.614309    11.00000   -1.50000
AFIX   0
C29   1    0.015309    0.428421    0.180675    11.00000    0.05052    0.03531 =
         0.02884   -0.00768   -0.00496    0.02089
AFIX 137
H32   2    0.063955    0.374863    0.177459    11.00000   -1.50000
H33   2    0.004877    0.465605    0.123793    11.00000   -1.50000
H34   2   -0.050899    0.401512    0.190055    11.00000   -1.50000
AFIX   0
C28   1   -0.016880    0.579917    0.263871    11.00000    0.05661    0.02658 =
         0.04447   -0.01060   -0.01857    0.01423
AFIX 137
H29   2   -0.085440    0.553010    0.265702    11.00000   -1.50000
H30   2   -0.020541    0.621119    0.209844    11.00000   -1.50000
H31   2    0.006566    0.619271    0.318445    11.00000   -1.50000

AFIX   0
HKLF 4 1 1 0 0 0 1 0 0 0 1


REM  PIzQOMMA_a.res in P2(1)/n
REM R1 =  0.0529 for    4627 Fo > 4sig(Fo)  and  0.0623 for all    5203 data
REM    323 parameters refined using      0 restraints

END

WGHT      0.0169      6.0111

REM Highest difference peak  0.544,  deepest hole -0.592,  1-sigma level  0.101
Q1    1   0.2995  0.5996  0.4557  11.00000  0.05    0.54
Q2    1   0.4404  0.5996  0.3225  11.00000  0.05    0.49
Q3    1   0.3351  0.3200  0.6237  11.00000  0.05    0.42
Q4    1   0.2421  0.2999  0.4557  11.00000  0.05    0.41
Q5    1   0.3388  0.0139  0.3723  11.00000  0.05    0.40
Q6    1   0.2319  0.6086  0.3298  11.00000  0.05    0.38
Q7    1   0.4260  0.6343  0.4228  11.00000  0.05    0.37
Q8    1   0.3824  0.6814  0.1740  11.00000  0.05    0.37
Q9    1   0.2742  0.4560  0.3100  11.00000  0.05    0.37
Q10   1   0.4209  0.6624  0.3492  11.00000  0.05    0.36
Q11   1   0.4428  0.5595  0.2615  11.00000  0.05    0.36
Q12   1  -0.0160  0.5144  0.3605  11.00000  0.05    0.36
Q13   1   0.3563  0.0996  0.3819  11.00000  0.05    0.35
Q14   1   0.3559  0.6429  0.2880  11.00000  0.05    0.34
Q15   1   0.2832  0.8641  0.4353  11.00000  0.05    0.34
Q16   1   0.0768  0.4798  0.3117  11.00000  0.05    0.34
Q17   1   0.5142  0.6257  0.2155  11.00000  0.05    0.34
Q18   1   0.0460  0.5625  0.2529  11.00000  0.05    0.34
Q19   1   0.3281  0.4851  0.3730  11.00000  0.05    0.34
Q20   1   0.4540  0.6995  0.4794  11.00000  0.05    0.34
;
_shelx_res_checksum   78100

_shelx_hkl_file
;
   0   0   2   25.43   72.15
   0   0  -2   13.56   87.81
   0   0   2   81.04   60.30
   0   0   3  417.14  188.66
   0   0  -3  139.07  173.79
   0   0   3   30.21   45.05
   0   0   430196.31  784.18
   0   0   429182.95  755.00
   0   0   5  109.46  114.47
   0   0  -5  269.85  137.39
   0   0   5   36.48  102.41
   0   0   6 1908.04  504.94
   0   0  -6 1294.54  341.60
   0   0   6 1293.66  179.19
   0   0   7   41.28  197.16
   0   0   7   76.19   96.04
   0   0   860089.95 1919.11
   0   0   860070.06 1806.54
   0   0   9  -40.84  191.98
   0   0   9   -1.86   91.42
   0   0  10 2573.87 1146.08
   0   0  10 2155.81  288.34
   0   0  11  216.40  266.78
   0   0  11   48.95  126.76
   0   0  1228079.48 1558.39
   0   0  1222907.85 1207.72
   0   0  13    2.51  192.32
   0   0  13   15.18   82.63
   0   0  14 1435.74  510.32
   0   0  14  786.62  295.95
   0   0  15  143.09  157.47
   0   0  1618109.74  908.08
   0   0  17  456.85  208.63
   0   0  18  378.33  344.27
   0   0  19  252.65  438.35
   0   0  20 3974.85 1206.67
   0   1   2 1461.13  111.55
   0  -1   2 2033.96  246.77
   0   1  -2 1752.05  182.62
   0   1   2 1347.77   96.71
   0  -1  -2 1526.14  124.75
   0   1   2 1713.55   88.67
   0  -1   2 1519.73   96.40
   0   1  -2 1661.85  114.66
   0   1   3 8420.61  575.04
   0  -1   3 7781.26  454.56
   0   1  -3 8153.18  498.25
   0   1   3 8506.90  493.70
   0   1   3 8041.19  422.24
   0  -1   3 7757.50  423.34
   0   1  -3 7562.28  477.47
   0   1   3 8641.83  476.33
   0   1   4 6385.47  550.86
   0  -1   4 6069.93  433.35
   0   1   4 6169.09  449.06
   0   1  -4 7023.30  455.90
   0  -1   4 7031.01  483.81
   0   1  -4 6757.34  416.03
   0   1   4 6903.90  384.77
   0   1   512791.30  700.37
   0  -1   514122.74 1103.17
   0   1   512666.95  702.64
   0   1  -514306.43  775.90
   0  -1   513618.44  719.20
   0   1  -513126.53  697.21
   0   1   513284.17  696.36
   0   1   640048.80 1296.84
   0  -1   639927.45 1300.35
   0   1   637331.13 1315.67
   0  -1   635507.82 1228.53
   0   1  -635975.31 1143.50
   0   1   639294.90 1223.63
   0  -1   724962.38  892.92
   0   1   721371.28 1263.66
   0  -1   721694.48 1190.35
   0   1   720429.47 1115.77
   0   1  -722911.22  782.54
   0  -1   8 4741.13  436.00
   0   1   8 3906.33  459.27
   0  -1   8 4494.60  391.53
   0   1   8 4483.78  332.43
   0   1  -8 5137.20  537.64
   0  -1   9 7447.13  716.76
   0   1   9 8997.91  669.42
   0  -1   9 8247.27  816.08
   0   1   9 8122.74  706.00
   0   1  -9 9099.44  575.74
   0  -1  10 9793.11 1347.47
   0   1  1011977.53 1055.81
   0  -1  1010742.35  944.37
   0   1  10 9213.31  636.99
   0   1 -10 8762.11  707.35
   0  -1  11 3801.91  360.91
   0   1  11 4747.52  440.84
   0  -1  11 4434.06  385.35
   0   1  11 4003.35  414.08
   0   1 -11 3844.48  378.56
   0   1  12 2222.95  780.71
   0  -1  12 2781.99  612.24
   0  -1  12 2315.22  466.34
   0   1  12 2709.54  357.45
   0  -1  13 2771.16  614.11
   0   1  13 2667.45  704.18
   0  -1  13 1971.93  295.54
   0   1  13 1472.59  399.07
   0  -1  14 5655.35  452.37
   0   1  14 6143.82  518.32
   0  -1  14 5642.73  633.10
   0   1  15 3800.14  382.93
   0  -1  15 2721.68  897.31
   0  -1  16  248.84  204.67
   0   1  16  127.30  145.90
   0  -1  17 2879.55  475.79
   0   1  17 2851.60 1099.30
   0  -1  18 1374.94  477.74
   0   1  18 2214.02 1005.99
   0   1  19 4006.68  974.97
   0  -1  19 1640.48  925.10
   0  -1  20  126.14  288.08
   0   1  20  394.69  123.37
   0  -2   0 8235.38  417.43
   0   2   0 8454.97  427.86
   0  -2   0 8791.01  473.25
   0   2   0 8536.17  476.85
   0  -2  -1 3939.02  226.70
   0   2   1 3404.00  198.84
   0  -2   1 3536.05  225.68
   0   2  -1 3429.49  201.20
   0  -2  -1 3690.27  228.11
   0   2   1 3671.14  396.76
   0  -2   1 3503.98  253.49
   0   2  -1 3737.38  266.64
   0   2   272636.36 1606.01
   0  -2   272422.41 1622.57
   0   2  -270433.46 1585.79
   0  -2  -273103.46 1638.05
   0   2   278355.68 1768.48
   0   2  -271369.54 1627.20
   0   2   3 6828.72  414.98
   0  -2   3 6592.63  419.94
   0   2  -3 6972.38  445.81
   0   2   3 6643.20  370.87
   0  -2  -3 6769.53  534.03
   0   2   3 7329.02  413.57
   0  -2   3 7848.12  699.33
   0   2  -3 6420.29  417.83
   0   2   412127.86  734.22
   0  -2   411990.84  701.25
   0   2  -410841.27  606.74
   0   2   411261.67  624.73
   0   2   411856.97  641.79
   0  -2   411377.58  630.00
   0   2  -410701.20  582.72
   0   2   411851.18  626.35
   0   2   5 1621.58  380.37
   0  -2   5 2323.32  450.62
   0   2  -5 1540.99  245.55
   0   2   5 1366.45  174.61
   0   2   5 1452.72  201.91
   0  -2   5 1981.66  450.34
   0   2  -5 1838.73  404.57
   0   2   5 1722.23  161.28
   0   2   6 2142.03  605.05
   0  -2   6 2020.03  508.11
   0   2   6 2100.04  518.32
   0   2   6 1627.33  381.83
   0  -2   6 1385.90  236.31
   0   2  -6 1852.28  197.51
   0   2   6 1827.31  197.49
   0  -2   724123.97  915.67
   0   2   725548.49  910.44
   0   2   722814.69  741.53
   0  -2   723145.52  847.64
   0   2  -722236.51  466.59
   0   2   724799.83  825.68
   0  -2   813292.77  866.42
   0   2   813681.51  813.06
   0   2   813008.72  707.47
   0  -2   813565.61  789.36
   0   2  -814289.34  785.75
   0   2   813166.04  712.54
   0  -2   913320.42  885.56
   0   2   913586.72  882.47
   0   2   913496.78  800.79
   0  -2   914884.42  999.66
   0   2   915121.37  901.65
   0   2  -915079.27  911.95
   0  -2  10 1914.25  531.86
   0   2  10 1672.50  464.68
   0   2  10 1110.60  118.53
   0  -2  10 1725.98  452.89
   0   2  10 1818.82  311.66
   0   2 -10 1282.14  153.72
   0  -2  1111471.01  995.91
   0   2  1112316.66  869.11
   0   2  1111293.54  663.89
   0  -2  1110653.40  733.24
   0   2  1113623.13  826.26
   0  -2  12  643.76  195.31
   0   2  12 1300.91  345.08
   0   2  12  496.20  130.52
   0  -2  12  467.78  414.45
   0   2  12  874.04  259.67
   0  -2  1312199.85  875.56
   0   2  1312898.66  886.12
   0  -2  1311329.49  829.40
   0   2  1311263.46  742.21
   0  -2  14 1298.75  451.36
   0   2  14 1492.33  468.77
   0  -2  14  673.10  265.47
   0   2  15 3228.37  318.87
   0  -2  15 2153.04  434.52
   0  -2  16  304.39  451.14
   0   2  16  273.14  402.80
   0  -2  17 4324.63  448.77
   0   2  17 2955.63  810.29
   0  -2  18  281.12  446.80
   0   2  18  215.42  232.98
   0  -2  19 7023.11  915.88
   0   2  19 5290.04  762.61
   0  -2  20  -30.71  288.85
   0   2  20  161.85  332.86
   0  -3   0   36.71   37.92
   0   3   0   22.40   63.14
   0  -3   0   78.21   86.31
   0   3   0   40.59  128.05
   0  -3  -130131.33  692.69
   0  -3   128029.87  672.05
   0   3  -126994.69  635.78
   0  -3   127053.13  755.43
   0  -3  -2 2776.06  352.97
   0   3   2 3094.30  205.64
   0  -3   2 2967.44  229.48
   0   3  -2 2830.41  243.51
   0  -3  -2 2449.15  160.82
   0   3   2 2457.47  191.66
   0  -3   2 2703.02  234.43
   0   3  -2 3271.05  247.85
   0  -3  -3  154.37   99.11
   0   3   3   20.81   62.28
   0  -3   3  -25.85  153.86
   0   3  -3   63.59  168.24
   0  -3  -3  275.00  149.43
   0   3   3  119.41  102.45
   0  -3   3   95.14  238.02
   0   3  -3   26.36  146.53
   0   3   4 4668.83  285.13
   0  -3   4 4205.28  510.56
   0   3  -4 3723.19  265.57
   0   3   4 3855.56  274.33
   0  -3  -4 4890.21  310.82
   0   3   4 4438.50  502.88
   0  -3   4 4639.58  353.86
   0   3  -4 3945.50  281.12
   0   3   5 4200.16  333.43
   0  -3   5 3799.98  370.68
   0   3  -5 4304.69  357.89
   0   3   5 4305.19  428.12
   0  -3  -5 3781.96  295.41
   0   3   5 3890.96  438.04
   0  -3   5 3713.13  343.59
   0   3  -5 4103.18  409.60
   0   3   623241.04  817.89
   0  -3   625940.47  961.16
   0   3   625431.70  995.75
   0   3   622893.32  761.68
   0  -3   625418.40  916.19
   0   3  -623592.34  805.59
   0   3   623629.44  806.89
   0  -3   7 5955.93  711.15
   0   3   7 5442.12  462.50
   0   3   7 5585.32  402.91
   0  -3   7 5693.50  514.37
   0   3  -7 5625.25  767.64
   0   3   7 4878.71  396.18
   0   3   8  594.47  264.72
   0   3   8  490.02  152.62
   0  -3   8  828.68  237.55
   0   3  -8  557.59  181.76
   0   3   8  458.37  142.02
   0   3   9 6295.68  743.20
   0   3   9 5294.51  496.87
   0  -3   9 5015.68  539.10
   0   3   9 5989.99  637.69
   0   3  1038074.41 1648.39
   0   3  1033346.44 1383.40
   0  -3  1033978.74 1501.26
   0   3  1033955.67 1399.63
   0  -3  11 5810.81  573.11
   0   3  11 4268.43  370.87
   0   3  11 4514.72  219.50
   0  -3  11 4511.19  286.23
   0   3  11 5485.27  661.69
   0  -3  12  492.87  308.03
   0   3  12  170.48  179.51
   0  -3  12   71.20  165.65
   0   3  12  124.55  100.44
   0  -3  13  660.51  307.80
   0   3  13  242.04  257.54
   0  -3  13  246.93  143.08
   0   3  13  103.15  109.16
   0  -3  14 5235.48  867.80
   0   3  14 9072.34  988.60
   0  -3  14 6644.82  468.71
   0  -3  15 1479.04  417.05
   0   3  15  715.01  323.14
   0  -3  16  223.89  201.38
   0   3  16  175.12  202.05
   0  -3  17  813.93  409.98
   0   3  17  813.68  283.63
   0  -3  18 8748.83  677.09
   0   3  18 8853.60  723.14
   0  -3  19  305.44  357.40
   0   3  19  321.80  324.59
   0   3  20  287.78  130.23
   0  -4   0175992.0 1366.37
   0   4   0175062.4 3895.55
   0  -4  -1 1508.73  179.11
   0   4   1 1154.26  137.88
   0  -4   1 1420.08  331.49
   0   4  -1  973.59  126.98
   0  -4  -1 1277.42  257.97
   0  -4   1 1195.54  440.33
   0   4   1 1297.38  332.23
   0   4  -1  909.05  169.49
   0  -4  -2  819.52  186.89
   0   4   2  505.07  137.55
   0  -4   2  608.32  171.69
   0   4  -2  431.57  175.69
   0  -4  -2  733.08  212.99
   0   4   2   44.45  192.23
   0  -4   2  429.46  303.12
   0   4  -2  643.08  156.12
   0  -4  -3 1296.40  333.54
   0   4   3 1122.89  155.79
   0  -4   3 1839.73  548.61
   0   4  -3 1587.17  375.51
   0  -4  -3 1680.59  513.43
   0   4   3 1235.07  270.25
   0  -4   3 2747.54  883.50
   0   4  -3 1581.27  423.63
   0   4   466618.79 2009.74
   0  -4   463046.71 2081.29
   0   4  -465015.34 1987.89
   0  -4  -464455.52 1989.89
   0   4   465196.21 2011.39
   0  -4   462383.24 2146.81
   0   4  -461822.76 1928.56
   0   4   5 1820.02  256.86
   0  -4   5 1616.40  297.51
   0   4  -5 1960.76  234.07
   0   4   5 1991.51  473.88
   0  -4  -5 1433.14  134.46
   0   4   5 1707.78  277.77
   0  -4   5 2078.87  446.01
   0   4  -5 1323.38  421.57
   0   4   6 1508.34  351.45
   0  -4   6 1748.09  401.50
   0   4   6 1889.78  425.71
   0  -4  -6 2146.97  568.62
   0   4   6 1679.06  144.11
   0  -4   6 2164.19  765.04
   0  -4   7 4463.10  544.17
   0   4   7 3712.35  342.99
   0   4   7 3449.94  296.42
   0  -4   7 3892.35  649.03
   0   4   7 3482.09  229.09
   0  -4   836969.07 1617.41
   0   4   838127.00 1649.07
   0   4   837485.55 1366.68
   0  -4   837824.09 1453.00
   0   4   839913.13 1497.99
   0  -4   923180.04  999.97
   0   4   922480.13 1001.31
   0   4   920180.45  773.58
   0  -4   922013.23  916.40
   0   4   921427.72  841.68
   0  -4  10  116.65  207.82
   0   4  10   85.19  213.99
   0   4  10    8.55   92.51
   0  -4  10   -4.23  177.28
   0   4  10   58.86   88.68
   0  -4  11 9407.24  703.52
   0   4  11 7927.97  690.50
   0   4  11 6741.22  500.22
   0  -4  11 7358.86  615.63
   0   4  11 8055.14  532.27
   0  -4  1220780.30 1290.99
   0   4  1221270.77 1639.39
   0  -4  1223256.38 1643.44
   0   4  1221816.76 1245.01
   0   4  13 1784.40  724.74
   0  -4  13 1700.03  727.03
   0   4  13 2391.11  301.11
   0   4  14  377.78  331.34
   0  -4  14  397.72  210.84
   0   4  15  355.26  212.50
   0  -4  15  248.38  229.97
   0  -4  16 7423.23  827.81
   0   4  16 5320.21  562.56
   0  -4  17 1603.61  322.73
   0   4  17  615.95  202.44
   0  -4  18  999.72  439.29
   0   4  18  237.31  279.27
   0  -4  19  193.93  281.19
   0   4  19 1117.70  310.85
   0   4  20 5352.35 1241.64
   0  -5   0   71.83   60.07
   0   5   0  156.56   66.97
   0  -5   0  223.57  178.92
   0   5   0  233.16   89.16
   0  -5  -140292.36  921.08
   0   5   139183.53  895.13
   0  -5   140338.53  959.90
   0   5  -137577.77  895.37
   0  -5  -141365.17 1075.69
   0   5   137726.26 1069.35
   0   5  -141164.51 1100.01
   0  -5  -2 1319.09  215.05
   0   5   2 1237.27  255.46
   0  -5   2 1624.48  448.45
   0   5  -2 1243.99  318.67
   0  -5  -2  664.04  550.55
   0  -5   2 1102.76  553.42
   0   5   2 1203.50  279.12
   0   5  -2 1166.90  332.65
   0  -5  -371419.69 2134.53
   0   5   368637.41 2050.61
   0  -5   369801.49 2137.07
   0   5  -370805.02 2156.28
   0  -5  -369405.48 2188.37
   0   5   366593.74 2064.39
   0  -5   373033.72 2330.55
   0  -5  -4 7925.80  623.28
   0   5   4 9156.56  539.11
   0  -5   4 8173.19  589.83
   0   5  -4 8295.42  609.76
   0  -5  -4 7210.01  562.94
   0   5   4 7736.76  560.02
   0  -5   4 9704.35  934.32
   0   5   563362.78 1963.07
   0  -5   555017.29 1763.81
   0   5   556650.28 1741.38
   0  -5  -555180.61 1792.14
   0   5   556384.45 1777.73
   0  -5   561131.55 2006.04
   0   5   6 6947.07  552.07
   0  -5   6 7428.00  566.86
   0   5   6 6416.13  501.30
   0  -5  -6 8442.71  601.33
   0   5   6 6690.99  616.62
   0  -5   6 7600.01  621.63
   0  -5   724479.86  879.45
   0   5   721424.22 1189.10
   0  -5  -722094.84 1245.44
   0   5   720738.68 1172.86
   0  -5   725381.57 1196.54
   0  -5   8 2400.99  669.52
   0   5   8 2797.66  242.76
   0   5   8 1494.09  312.44
   0  -5   8 2275.94  632.19
   0   5   8 2013.46  201.43
   0  -5   9 5479.37  518.36
   0   5   9 5731.85  413.46
   0   5   9 5474.64  396.38
   0  -5   9 5998.88  752.57
   0   5   9 5615.82  426.31
   0  -5  10 3826.82  409.60
   0   5  10 3309.10  507.12
   0   5  10 3300.59  253.63
   0  -5  10 4050.88  524.61
   0   5  10 3533.65  297.82
   0  -5  11 7574.19  736.87
   0   5  11 8387.90  895.59
   0  -5  11 7072.40  626.30
   0   5  11 8323.01  676.25
   0  -5  12 3118.47  418.46
   0   5  12 2811.25  744.42
   0  -5  12 2523.92  808.79
   0   5  12 2693.37  407.91
   0  -5  13 7731.85  972.67
   0   5  13 6129.52  653.78
   0  -5  13 6014.89  599.05
   0  -5  14  235.95  309.30
   0   5  14  129.40  141.51
   0  -5  14   77.78  140.59
   0  -5  1510408.13 1647.16
   0   5  15 8259.58  711.22
   0  -5  15 8231.50  840.42
   0  -5  16  763.96  267.31
   0   5  16  953.46  234.67
   0  -5  17  579.72  650.54
   0   5  17 1382.40  512.85
   0   5  18  114.12  169.50
   0   5  19 2002.93 1000.18
   0   5  20  176.14  228.28
   0  -6   0 7505.02  565.83
   0   6   0 6898.83  477.01
   0  -6   0 7409.93  654.62
   0  -6  -116226.11  847.43
   0  -6   117076.81  904.10
   0   6   116072.06  849.82
   0   6  -116255.30  859.73
   0  -6  -119094.76 1086.75
   0  -6   115737.13  960.72
   0  -6  -2 7018.86  479.94
   0   6   2 7837.98  529.13
   0  -6   2 8020.75  707.01
   0   6  -2 7499.37  522.88
   0  -6  -2 7596.40  584.28
   0  -6   2 7221.92  758.64
   0  -6  -3  119.21   62.11
   0   6   3   44.20   75.34
   0  -6   3  249.14  164.07
   0   6  -3   17.22   70.38
   0  -6  -3  372.75  219.49
   0   6   3 -167.48  125.41
   0  -6   3  515.06  237.82
   0  -6  -428958.41  950.44
   0   6   429016.68  914.91
   0  -6   427395.03  957.38
   0   6  -427790.08  930.94
   0  -6  -429896.00 1088.23
   0  -6   428088.32 1067.41
   0   6   518150.12  979.15
   0  -6   519188.24 1062.34
   0   6   519954.64 1139.36
   0  -6  -521205.71 1164.99
   0  -6   517959.26 1061.72
   0   6   6 2653.09  161.20
   0  -6   6 2646.16  273.89
   0   6   6 2928.15  345.03
   0  -6  -6 2440.76  234.04
   0  -6   6 3888.95  571.13
   0  -6   7 7281.75  728.67
   0   6   7 8135.29  843.61
   0  -6  -7 7826.73  868.26
   0  -6   7 8763.52  629.13
   0  -6   815073.09 1067.78
   0   6   813530.02  895.23
   0  -6  -812959.60  874.04
   0  -6   813254.74  950.48
   0  -6   932139.32 1455.41
   0   6   928980.63 1280.48
   0  -6   929157.59 1389.73
   0   6   929705.32 1269.78
   0  -6  10  501.25  261.72
   0   6  10  415.58  114.22
   0  -6  10  412.52  101.55
   0   6  10  488.42  211.46
   0  -6  11 3186.07  440.18
   0   6  11 2809.59  720.67
   0  -6  11 2904.41  358.60
   0   6  11 3453.19  449.67
   0  -6  12 5972.78 1221.62
   0   6  12 6194.61  521.90
   0  -6  12 6140.79 1185.60
   0   6  12 6241.76  381.65
   0  -6  13 2267.76 1212.72
   0   6  13 2030.08  715.15
   0  -6  13 2950.66  760.31
   0  -6  14  224.48  238.81
   0   6  14  231.99  305.04
   0  -6  14  123.12  198.00
   0  -6  15 2613.12  873.27
   0   6  15 2499.53  924.47
   0  -6  15 2145.82  744.68
   0  -6  16 2586.77  883.89
   0   6  16 2119.46  397.49
   0  -6  17 1820.13 1171.81
   0   6  17 2181.97  746.07
   0  -6  18  351.21  399.55
   0   6  18  290.83  180.14
   0  -6  19  408.76  452.05
   0   6  19  250.98  229.50
   0   6  20 2087.75 1084.86
   0  -7   0   22.03   74.51
   0   7   0   31.44   52.23
   0  -7  -1 6525.66  464.60
   0  -7   1 6300.88  479.27
   0   7   1 5615.98  445.60
   0   7  -1 5978.18  416.96
   0  -7  -1 7854.85  765.15
   0  -7   1 6446.85  674.51
   0  -7  -240700.31 1196.47
   0   7   242062.16 1223.40
   0  -7   240435.77 1287.69
   0   7  -239831.25 1203.92
   0  -7   237232.31 1299.47
   0  -7  -3  774.50  157.85
   0   7   3  661.39  159.58
   0  -7   3  750.28  239.59
   0   7  -3  859.40  268.44
   0  -7  -3  346.10  342.26
   0  -7   3 1539.24  568.70
   0  -7  -4 3378.74  190.76
   0   7   4 2995.89  186.65
   0  -7   4 3093.68  504.62
   0  -7  -4 3339.23  811.87
   0  -7   4 3322.17  347.22
   0   7   5    6.83   80.30
   0  -7   5  472.75  164.73
   0   7   5  104.62   98.84
   0  -7  -5  156.63  154.56
   0  -7   5  201.32  128.04
   0   7   618671.76 1094.10
   0  -7   618665.31 1139.33
   0   7   619873.72  866.32
   0  -7  -617704.99 1093.54
   0  -7   621802.24  973.03
   0  -7   7  201.55  269.27
   0   7   7  166.38  119.01
   0  -7  -7    9.82  107.22
   0  -7   7  182.47  196.40
   0  -7   8  119.71  255.34
   0   7   8   42.91  104.67
   0  -7  -8  152.52  206.87
   0  -7   8  373.11  239.43
   0  -7   9 1915.87  698.89
   0   7   9 2371.27  280.21
   0  -7   9 2561.93  685.61
   0   7   9 2422.75  431.77
   0  -7  10 5034.78  481.36
   0   7  10 5533.89  319.60
   0  -7  10 5070.30  347.90
   0   7  10 6539.20  684.93
   0  -7  11  275.54  271.16
   0   7  11  168.89  214.83
   0  -7  11   91.48  156.98
   0   7  11  493.60  253.12
   0  -7  12  333.92  248.69
   0   7  12  180.59  130.26
   0  -7  12  401.54  325.53
   0   7  12  438.24  140.88
   0  -7  13  469.51  520.29
   0   7  13  573.90  264.95
   0  -7  13  431.91  163.64
   0  -7  1433256.55 1106.54
   0   7  1426677.86 2295.84
   0  -7  1428337.63 2879.26
   0  -7  15  148.74  272.25
   0   7  15   40.88  168.80
   0  -7  15  555.38  160.73
   0  -7  16  666.04  392.93
   0   7  16  310.37  183.32
   0  -7  17  216.06  252.28
   0   7  17  149.36  183.19
   0  -7  18 5188.13  767.26
   0   7  18 4044.15  478.58
   0   7  19  525.17  153.01
   0  -8   020459.72 1085.00
   0   8   017888.57  944.97
   0  -8   020424.52 1175.59
   0  -8  -118201.44  960.28
   0  -8   118972.69 1089.97
   0   8   116680.28  885.38
   0   8  -117761.83  938.97
   0  -8  -119081.99 1110.07
   0  -8   116194.70 1048.10
   0  -8  -2   99.15   63.14
   0  -8   2  197.58  168.88
   0   8   2   63.96   77.75
   0   8  -2   91.39  116.51
   0  -8  -2  211.54  237.77
   0  -8   2  873.95  405.34
   0  -8  -310221.47  600.66
   0   8   310010.21  595.29
   0  -8   3 9263.94  578.09
   0   8  -3 8967.33  567.51
   0  -8  -3 9786.18  946.02
   0  -8   310019.78  991.57
   0  -8  -418898.55  300.11
   0   8   417073.04  994.47
   0  -8   418232.06 1101.39
   0  -8  -416679.83 1098.49
   0  -8   416972.54 1087.79
   0   8   5 5660.82  496.44
   0  -8   5 4878.57  483.34
   0   8   5 6523.20  598.97
   0  -8  -5 4961.16 1200.18
   0  -8   5 5814.67 1341.35
   0   8   6   40.72   69.54
   0  -8   6  115.42  153.34
   0   8   6   42.05   77.14
   0  -8  -6  244.23  143.92
   0  -8   6  -81.69  229.12
   0  -8   711320.74  897.33
   0   8   711798.56  852.21
   0  -8  -712470.58  893.04
   0  -8   711879.65  927.70
   0  -8   8 7915.83  600.79
   0   8   8 7952.95  532.26
   0  -8  -8 7515.66  672.55
   0  -8   8 7813.74  968.67
   0  -8   917696.19 1261.08
   0   8   918200.25 1112.25
   0  -8  -919681.73 1144.48
   0  -8   918231.12 1129.37
   0  -8  10  227.39  209.29
   0   8  10  117.26  132.47
   0  -8  10  293.52  243.11
   0   8  10  441.58  177.33
   0  -8  11  559.46  335.81
   0   8  11  435.25  194.43
   0  -8  11  863.68  232.26
   0   8  11  259.49  227.31
   0  -8  1218097.10 1151.24
   0   8  1217846.00 1107.33
   0  -8  1216630.65 1047.71
   0   8  1216566.18  952.36
   0  -8  1310008.74  579.09
   0   8  13 9291.69  688.44
   0  -8  1310419.15 1004.09
   0  -8  14  142.77  214.89
   0   8  14  325.69  228.88
   0  -8  14  574.87  293.16
   0  -8  15 1392.40  856.35
   0   8  15 1468.54  695.23
   0  -8  15 1501.51  392.76
   0  -8  16 1638.44  619.79
   0   8  16 1279.77  789.50
   0  -8  17 5097.12  901.88
   0   8  17 3561.35  937.68
   0  -8  18  601.71  249.55
   0  -9   0  227.30   98.27
   0   9   0   51.35   77.90
   0  -9   0  280.01  301.75
   0  -9  -125661.18  904.27
   0  -9   126475.50  987.13
   0   9   123441.80  823.65
   0   9  -123155.78  850.01
   0  -9  -123533.19 1359.34
   0  -9  -2 1397.55  224.06
   0  -9   2 1883.64  487.79
   0   9   2 1485.46   82.77
   0   9  -2 1257.26  364.49
   0  -9  -2 1340.01  760.81
   0  -9   2 1099.54  601.60
   0  -9  -315514.17  900.41
   0   9   315051.96  858.83
   0  -9   314359.17  918.82
   0   9  -314188.61  844.65
   0  -9  -314648.11 1289.45
   0  -9   314775.94 1099.48
   0  -9  -4 1398.93  205.62
   0   9   4 1609.94  195.31
   0  -9   4 1937.93  552.67
   0  -9  -4 1565.44  383.14
   0  -9   4 1622.58  360.62
   0   9   515572.71  355.24
   0  -9   514798.56 1022.29
   0   9   516079.22  674.35
   0  -9  -515971.70  840.60
   0  -9   516303.69  856.18
   0   9   6 1609.10  224.88
   0  -9   6 2020.43  293.01
   0   9   6 1766.64  300.11
   0  -9  -6 2545.56  415.84
   0  -9   6 1753.26  470.39
   0   9   7 9297.15  749.92
   0  -9   710614.01 1256.62
   0   9   712591.22  734.17
   0  -9  -7 9906.76  831.25
   0  -9   7 9687.03  879.06
   0  -9   8  657.15  322.53
   0   9   8  436.25  150.06
   0  -9  -8  804.92  323.09
   0  -9   8 1316.40  362.76
   0  -9   9 1216.63  564.67
   0   9   9  650.66  293.01
   0  -9  -9 1049.78  546.22
   0  -9   9  866.81  341.92
   0  -9  10 3969.84  789.59
   0   9  10 2952.94  393.82
   0  -9  10 2731.98  719.91
   0  -9  11 3714.16  919.04
   0   9  11 3181.76  681.53
   0  -9  11 3513.90 1159.95
   0   9  11 2986.41  457.85
   0  -9  12  211.03  140.10
   0   9  12  265.98  230.54
   0  -9  12  704.50  212.99
   0   9  12   94.50  137.91
   0  -9  13 8360.79 1021.48
   0   9  13 7676.53  393.54
   0  -9  13 8059.76  946.85
   0  -9  14  515.54  412.18
   0   9  14  450.22  285.01
   0  -9  14  293.46  344.01
   0  -9  15 4590.86 1005.20
   0  -9  15 6139.48 1069.80
   0  -9  16   28.21  404.89
   0  -9  17 2351.05  734.16
   0  -9  18 1749.33  505.97
   0 -10   019924.76  828.21
   0  10   018768.34  774.51
   0 -10   019423.96  967.44
   0 -10  -1  120.76  132.11
   0 -10   1  651.64  248.14
   0  10   1  505.44  111.50
   0  10  -1  237.25  105.17
   0 -10  -1  480.02  379.09
   0 -10  -2    4.98   54.98
   0 -10   2   52.89   71.38
   0  10   2   17.99   68.08
   0  10  -2   54.70   48.10
   0 -10  -2  238.75  212.41
   0 -10   2  191.86  135.24
   0 -10  -3 2096.83  133.92
   0 -10   3 1817.99  207.86
   0  10   3 1911.43  187.93
   0 -10  -3 1761.88  579.05
   0 -10   3 1664.10  404.02
   0  10   427904.02 1476.79
   0 -10   428181.31 1638.13
   0 -10  -428652.86 1776.28
   0 -10   427348.60 1797.59
   0  10   5 5504.48  490.52
   0 -10   5 7019.43  769.27
   0  10   5 6576.15  398.75
   0 -10  -5 6546.86  684.03
   0 -10   5 7023.46  655.26
   0 -10   6  179.78  118.58
   0  10   6  181.65  136.54
   0 -10  -6  342.79  169.85
   0 -10   6  154.27  192.34
   0 -10   7 3612.62  524.17
   0  10   7 4031.31  185.18
   0 -10  -7 3919.30  343.10
   0 -10   7 4623.60  672.42
   0 -10   812918.82  583.71
   0  10   814988.47  916.54
   0 -10  -813279.24  926.15
   0 -10   814972.57 1017.25
   0 -10   9  164.12  244.06
   0  10   9  261.56  181.02
   0 -10  -9  401.79  217.03
   0 -10   9  277.33  434.53
   0 -10  10 1140.30  528.37
   0  10  10  474.91  259.83
   0 -10 -10 1084.44  247.64
   0 -10  10  850.29  335.03
   0 -10  11  557.89  301.37
   0  10  11   39.10  116.96
   0 -10  11  359.84  188.93
   0  10  11   78.70  134.14
   0 -10  1210013.08  616.49
   0 -10  12 9878.98  625.88
   0 -10  13 2793.96  558.40
   0 -10  13 2001.21  669.50
   0 -10  14  454.17  311.62
   0 -10  14  372.94  175.64
   0 -10  15  906.23  541.85
   0 -10  15  901.75  523.32
   0 -10  16 6186.91 1556.61
   0 -10  17  427.42  328.15
   0 -11   0   17.82   46.63
   0  11   0    8.46   23.57
   0 -11   0  472.65  285.02
   0 -11  -1  217.28  111.84
   0 -11   1  218.11  134.88
   0  11   1  206.01   77.49
   0  11  -1  101.20   96.24
   0 -11  -1  127.75  467.12
   0 -11  -210754.88  803.58
   0 -11   211619.99  988.43
   0  11   2 9169.54  685.17
   0  11  -2 9533.69  743.97
   0 -11  -212087.92  647.80
   0 -11   2 9992.51  913.70
   0 -11  -311417.71  848.88
   0 -11   310648.54  891.01
   0 -11  -310953.96 1017.44
   0 -11   313150.19  860.62
   0 -11   4  255.23  107.69
   0  11   4  406.30  115.21
   0 -11  -4  437.35  281.13
   0 -11   4  993.62  340.41
   0 -11   5 1443.89  435.89
   0  11   5 1419.55  143.21
   0 -11  -5 1621.21  286.18
   0 -11   5 2079.75  573.00
   0 -11   622546.02 1337.50
   0 -11  -622879.29 1400.78
   0 -11   620295.76 1345.60
   0 -11   7 1065.26  326.87
   0 -11  -7 1068.16  369.07
   0 -11   7  460.67  216.65
   0 -11   8 2421.94  313.50
   0 -11  -8 1829.70  493.91
   0 -11   8 1963.58  567.42
   0 -11   9 8477.92  537.24
   0 -11  -9 8604.38 1060.17
   0 -11   9 8076.50  665.02
   0 -11  10 6882.00  529.96
   0 -11 -10 6212.62  402.12
   0 -11  10 5620.79 1317.30
   0 -11  11 2076.31  744.22
   0 -11  11 1414.71  952.42
   0 -11  12   98.28  212.43
   0 -11  12  293.99  156.50
   0 -11  13  769.54  533.91
   0 -11  13  764.79  412.94
   0 -11  14 5248.18 1000.74
   0 -11  14 4438.46 1505.50
   0 -11  15  822.92  329.20
   0 -11  15  180.75  272.64
   0 -11  16  357.45  407.64
   0 -11  17 2038.44 1371.12
   0 -12   0  736.95  241.06
   0 -12   0 1343.26  801.69
   0 -12  -112346.30  732.27
   0 -12   112062.00  797.33
   0 -12  -111624.01  993.11
   0 -12   113799.82 1020.92
   0 -12   2  154.50   87.98
   0 -12  -2  295.34  262.14
   0 -12   2  413.39  156.32
   0 -12   313146.83  766.18
   0 -12  -313616.91 1498.59
   0 -12   313132.24  901.06
   0 -12   4 4314.34  321.32
   0 -12  -4 5772.45  451.90
   0 -12   4 3468.39 1184.97
   0 -12   5 6934.84 1098.19
   0 -12  -5 6512.09  633.63
   0 -12   5 7437.99  988.04
   0 -12   6   95.96  192.91
   0 -12  -6  448.17  233.62
   0 -12   6  398.74  228.59
   0 -12   7 6628.15  560.67
   0 -12  -7 6184.63  780.32
   0 -12   7 6265.22 1394.26
   0 -12   8 2158.83  524.77
   0 -12  -8 1390.94  496.32
   0 -12   8 1427.03  527.60
   0 -12   9 9192.67  454.26
   0 -12  -9 7413.87  602.41
   0 -12   9 7050.11 1810.31
   0 -12  10  287.54  145.15
   0 -12 -10  234.02  142.14
   0 -12  10  168.24  281.12
   0 -12  11 6529.26  930.15
   0 -12 -11 6524.37  358.62
   0 -12  11 8343.51  878.85
   0 -12  12  241.59  301.38
   0 -12  12 1236.57  616.61
   0 -12  13 5673.45 1047.37
   0 -12  13 5740.79 1265.01
   0 -12  14  127.53  208.80
   0 -12  14  495.15  342.66
   0 -12  15  439.92  507.47
   0 -12  15  112.08  455.23
   0 -12  16  545.99  358.57
   0 -13   0  523.27  367.50
   0 -13  -1 1239.12  414.83
   0 -13   1 1123.52  603.83
   0 -13   2 4892.07  234.63
   0 -13  -2 4690.79  671.84
   0 -13   3 4564.79  252.70
   0 -13  -3 5185.29 1068.48
   0 -13   3 5263.45  810.18
   0 -13   4  169.83  116.23
   0 -13  -4  253.82  327.59
   0 -13   4  256.10  210.63
   0 -13   5 3521.37  283.20
   0 -13   5 2280.12  304.37
   0 -13   614895.30  915.24
   0 -13  -617212.15 1159.76
   0 -13   613625.61 1308.57
   0 -13   7 4816.71  764.91
   0 -13  -7 4823.50  602.08
   0 -13   7 4891.03  773.40
   0 -13   8 1446.87  451.35
   0 -13  -8  938.62  773.76
   0 -13   8 1435.75  829.89
   0 -13   9  776.58  398.99
   0 -13  -9  845.28  271.44
   0 -13   9  862.11  800.88
   0 -13  10 5708.54  530.02
   0 -13 -10 4566.93  702.03
   0 -13  10 6026.16  525.48
   0 -13  11  157.47  252.71
   0 -13 -11  177.74  143.26
   0 -13  11  545.55  210.75
   0 -13  12 4150.93  532.38
   0 -13  12 2217.55  955.63
   0 -13  13 6354.87  907.11
   0 -13  13 2810.41 1209.00
   0 -13  14  867.09  557.93
   0 -13  14   59.80  446.38
   0 -13  15  919.54  720.26
   0 -13  15 1475.94  935.85
   0 -13  16  288.98  249.23
   0 -14   023297.51 1520.46
   0 -14  -1  738.57  502.39
   0 -14   1  521.90  328.84
   0 -14  -2  395.10  427.67
   0 -14  -3  697.32  369.82
   0 -14   3   91.39  275.95
   0 -14  -417588.96 1637.24
   0 -14   415023.43 1416.46
   0 -14  -5  627.61  253.91
   0 -14   5   66.66  299.24
   0 -14  -6  511.05  295.42
   0 -14   6  236.33  238.37
   0 -14   7  560.12  253.92
   0 -14  -7  728.28  367.15
   0 -14   7  634.89  375.87
   0 -14   811547.21 1034.77
   0 -14  -810012.85 1100.98
   0 -14   810849.09 1130.74
   0 -14   9  405.42  210.46
   0 -14  -9  958.08  431.97
   0 -14   9  476.81  279.66
   0 -14  10  456.32  288.06
   0 -14 -10  442.47  204.18
   0 -14  10    4.06  447.60
   0 -14  11   79.35  140.92
   0 -14  11   27.72  258.80
   0 -14  12 8585.78  933.92
   0 -14  12 7230.01  949.65
   0 -14  13  202.96  274.68
   0 -14  13  780.65  772.44
   0 -14  14   76.23  192.17
   0 -14  14  434.33  220.89
   0 -14  15  183.18  129.60
   0 -15   0  346.35  265.23
   0 -15  -1 3420.43 1367.48
   0 -15   1 4163.42 1116.39
   0 -15  -2 3978.44 1320.20
   0 -15   2 5351.43 1377.60
   0 -15  -3 7618.23 1788.21
   0 -15   3 7933.63 1729.92
   0 -15  -4  409.48  121.20
   0 -15   4  411.43  335.39
   0 -15  -5 5029.86 1458.43
   0 -15   5 1788.22  507.51
   0 -15  -6 2328.06  580.45
   0 -15   6 3191.85  909.25
   0 -15  -7 1322.84  516.95
   0 -15   7 1616.12  603.61
   0 -15  -8  157.21  115.25
   0 -15   8   83.60  412.73
   0 -15  -9 3413.81 1081.58
   0 -15   9 2231.05 1102.85
   0 -15 -10 1479.41  521.83
   0 -15  10 1512.79 1051.89
   0 -15  11 2305.80 1188.24
   0 -15  12  322.22  144.60
   0 -15  13 2229.93  301.35
   0 -16   0  701.59  385.51
   0 -16  -1 5435.99 1340.33
   0 -16   1 4560.96 1067.34
   0 -16  -2  171.20  277.67
   0 -16   2  369.34  302.30
   0 -16  -3 4988.47 1610.27
   0 -16   3 7029.63 1879.80
   0 -16  -4  423.34  320.30
   0 -16   4 1353.34  572.12
   0 -16  -5 6901.07 1458.53
   0 -16   5 4737.51 1054.47
   0 -16  -6  195.59  212.98
   0 -16   6  159.03  391.06
   0 -16  -7 1971.48  722.94
   0 -16   7 1231.56  814.53
   0 -16  -8  556.23  480.71
   0 -16   8  192.63  369.76
   0 -16  -9  623.35  603.82
   0 -16   9  361.92  531.90
   0 -16  10   65.20  378.38
   0 -16  11 1496.68 1047.99
   0 -17   0  871.60  398.98
   0 -17  -1 1749.64  586.81
   0 -17   1 3090.60 1213.74
   0 -17  -2 7475.08 1412.47
   0 -17   2 5019.26  643.18
   0 -17  -3  933.62  487.18
   0 -17   3  242.87  235.81
   0 -17  -4   97.66  334.33
   0 -17   4  362.96  422.23
   0 -17  -5  922.17  414.85
   0 -17   5  283.84  447.70
   0 -17  -6 8653.15 1003.15
   0 -17   6 7732.05 1300.72
   0 -17  -7 1515.21  862.52
   0 -17   7 1796.95  473.27
   0 -17  -8  307.41  250.60
   0 -17   8 1277.11  435.27
   0 -17  -9  607.76  301.21
   0 -18   0 4667.07 1045.51
   0 -18   1 1433.92  543.27
   0 -18  -1 1640.83  632.14
   0 -18  -2  411.54  329.15
   0 -18  -3 2058.11  748.53
   0 -18  -4 3541.40 1401.16
   0 -18   4 3624.72 1230.85
   0 -18  -5 1771.83  816.46
   0 -18  -6  235.31  249.72
   0 -18  -7  181.23  225.73
   0 -18  -8 4987.63 1372.34
   0 -19  -4  852.53  466.98
  -1   0  20  128.74  185.33
  -1   0  19  603.35  426.35
  -1   0  18  308.94  235.44
  -1   0  1712177.63 1016.22
  -1   0  16  225.82  188.29
  -1   0  15 3468.80  384.50
  -1   0  14  690.72  306.47
  -1   0  14  103.59  144.62
  -1   0  1320946.24 1570.55
  -1   0  1319460.91 1123.16
  -1   0  12  224.60  406.80
  -1   0  12  338.64  185.59
  -1   0  11 7659.28  643.69
  -1   0  11 8561.95  649.90
  -1   0  10  -22.36  172.91
  -1   0  10   65.38  106.38
   1   0 -10  133.79   67.16
  -1   0   918984.76 1307.00
  -1   0   920228.36 1249.51
   1   0  -918677.61 1007.66
  -1   0   8   -3.27  195.24
  -1   0   8  177.57  113.76
   1   0  -8   74.78   89.25
  -1   0   710286.65  664.84
  -1   0   7 9031.22  265.70
   1   0  -7 9887.65  576.27
  -1   0   6  -86.78  143.52
  -1   0   6  -14.95  193.73
  -1   0   6  -12.99  126.82
   1   0  -6  130.46   54.69
  -1   0   529344.44  909.28
  -1   0   529631.46  789.34
  -1   0   532749.01  816.25
   1   0  -530640.18  841.37
  -1   0   4  128.23  233.91
  -1   0   4  179.37  107.94
   1   0  -4   88.16  117.02
   1   0  -3 5180.12  331.22
  -1   0   3 6989.51  549.76
  -1   0   3 5496.97  332.65
   1   0  -3 6798.78  493.55
   1   0  -2   40.82   54.16
  -1   0   2  102.77   95.03
  -1   0   2   18.20   51.46
   1   0  -2   48.45   92.83
   1   0   1  -77.42   58.59
   1   0   2  134.48  119.40
  -1   0  -2  140.63  136.20
   1   0   2   67.96   38.02
   1   0   314360.38  765.67
  -1   0  -315334.96  940.18
   1   0   315481.15  776.34
   1   0   4  -63.26  162.80
  -1   0  -4   13.81   77.39
   1   0   4   15.85   44.00
   1   0   5  875.95  455.50
  -1   0  -5  850.79  163.92
   1   0   5 1056.91  163.52
   1   0   6  260.04  229.39
   1   0   6   58.52   93.91
   1   0   7 7089.11  606.02
   1   0   7 5978.27  426.70
   1   0   8   -0.75   97.97
   1   0   8   17.77   57.23
   1   0   939180.92 1490.42
   1   0   938842.97 1371.14
  -1   0  -941330.35 1459.73
   1   0  10   69.58  228.45
   1   0  10   35.45   67.50
  -1   0 -10   25.27   47.71
   1   0  1114237.34  917.49
   1   0  1113891.39  873.36
  -1   0 -1112842.58  757.70
   1   0  12  258.32  379.68
   1   0  12  177.53   98.81
  -1   0 -12   94.05   52.59
   1   0  13 2093.98  542.03
   1   0  13 1479.85  237.25
   1   0  14  251.85  282.71
   1   0  1523210.32 1497.68
   1   0  16  796.58  464.08
   1   0  17 1178.78  713.49
   1   0  18  437.43  269.45
   1   0  19 6385.25  972.15
   1   0  20  217.48  224.31
  -1   1  20  834.18  507.31
  -1  -1  20 1115.51  293.05
  -1  -1  19 3409.24 1257.52
  -1   1  19 2930.73  293.68
  -1   1  18 7432.62 1115.37
  -1  -1  18 8315.04 1112.14
  -1  -1  17  250.40  205.93
  -1   1  17  305.34  182.62
  -1  -1  16 2048.00 1190.68
  -1   1  16 2427.11  625.96
  -1   1  15 8500.61  832.10
  -1  -1  15 8955.75  619.89
  -1  -1  15 8289.83  480.06
  -1  -1  14 3645.00  695.11
  -1   1  14 5270.99  783.41
  -1  -1  14 3813.38  529.64
  -1   1  14 3913.98  550.79
  -1  -1  13  661.03  440.06
  -1   1  13  719.28  278.20
  -1  -1  13  156.62  153.67
  -1   1  13  473.56  204.43
  -1  -1  12 4525.94  331.86
  -1   1  12 5186.22 1427.67
  -1  -1  12 4327.71  566.11
  -1   1  12 4029.24  237.17
  -1  -1  1115189.52 1122.35
  -1   1  1116325.59  839.73
  -1  -1  1115520.02  557.34
  -1   1  1113796.33  983.44
  -1  -1  1019382.35  997.18
  -1   1  1020414.02  907.06
  -1  -1  1020325.31  855.73
  -1   1  1020292.53  814.88
   1  -1 -1019174.78  764.04
  -1  -1   9 2897.02  839.48
  -1   1   9 2394.90  312.64
  -1  -1   9 2762.81  523.45
  -1   1   9 3005.12  333.24
   1   1  -9 2250.19  246.34
   1  -1  -9 2313.67  198.53
  -1  -1   815312.60  956.94
  -1  -1   815588.79 1025.93
  -1   1   813730.43  893.80
   1   1  -814757.75  839.86
   1  -1  -814360.33  788.17
  -1  -1   7 8682.24  679.89
  -1   1   710125.88  977.38
  -1  -1   7 8832.67  504.98
  -1   1   7 9328.93  566.24
   1   1  -7 9556.45  557.40
   1  -1  -7 8373.93  614.28
  -1   1   629667.66 1012.87
  -1  -1   630249.50 1045.42
  -1   1   629384.85 1019.16
  -1  -1   629835.40  987.94
   1   1  -628663.21  923.99
  -1   1   630634.56  994.27
   1  -1  -629748.64  944.07
  -1  -1   5 3061.79  255.77
  -1   1   5 2886.25  271.90
  -1  -1   5 3181.68  262.65
  -1  -1   5 3599.28  430.80
   1   1  -5 3242.97  230.68
  -1   1   5 3099.89  289.68
   1  -1  -5 3103.90  253.26
  -1  -1   442914.06 1055.39
  -1   1   442371.51 1048.45
  -1  -1   440633.70 1002.10
  -1  -1   440739.39  986.78
   1   1  -441339.54  989.04
  -1   1   441129.31  984.27
   1  -1  -439313.57  929.04
   1  -1  -333977.72  853.08
  -1   1   331457.28  784.33
  -1  -1   332153.47  802.87
  -1  -1   333229.11  808.93
   1   1  -330783.50  754.19
  -1   1   331778.11  773.86
   1  -1  -331516.54  753.32
   1   1  -234121.87  811.38
  -1  -1   233491.84  795.98
   1  -1  -233678.73  801.34
  -1   1   233566.71  829.08
  -1  -1   235086.61  830.48
   1   1  -233855.86  826.92
  -1   1   234851.35  803.51
   1   1  -1  153.59   77.91
  -1   1   044278.58  989.01
  -1   1  -2100548.2 2226.26
  -1  -1  -2104302.4 2291.62
   1  -1   320876.11  580.34
  -1   1  -318480.65  534.59
  -1  -1  -319520.65  535.89
   1   1   321411.56  489.42
   1  -1   426733.59  720.84
   1  -1   425970.35  669.91
   1  -1   529570.27  831.53
  -1   1  -527001.73  746.97
  -1  -1  -527590.94  736.77
   1   1   529037.30  689.82
   1  -1   527017.63  689.25
   1   1   528129.72  648.51
   1  -1   612560.93  742.20
   1   1   611094.48  667.85
   1  -1   611732.14  674.63
   1   1   611499.49  607.64
   1  -1   7 1364.31  601.41
   1   1   7 1080.47  478.57
   1  -1   7 1288.76  351.26
   1   1   7 1033.69  161.22
   1  -1   8 2069.78  578.49
   1   1   8 2169.15  283.63
   1  -1   8 2155.96  376.10
   1   1   8 2517.59  322.37
   1  -1   9 5847.06  615.79
   1   1   9 6162.78  678.86
   1  -1   9 5455.68  537.14
   1   1   9 5509.38  530.23
   1  -1  1010568.16  957.95
   1   1  1010010.30  810.34
   1   1  10 9294.89  593.50
   1  -1  1010200.85  680.93
   1   1  1010946.27  712.10
   1   1  11 3138.40  272.66
   1  -1  11 2312.55  366.45
   1   1  11 2163.11  205.13
   1  -1  11 2792.45  301.34
   1   1  11 2718.28  256.22
   1  -1  1213259.95  960.11
   1   1  1215863.50  989.01
   1  -1  1213926.07  781.51
   1   1  1213865.32  731.78
  -1   1 -1213107.72  711.17
   1  -1  13 4486.43 1010.38
   1   1  13 3270.11  912.22
   1  -1  13 2872.53  636.21
   1   1  13 2430.90  262.25
   1  -1  1415759.90 1783.49
   1   1  1413256.95 1265.23
   1  -1  15 1004.63  512.81
   1   1  15 1198.96  711.37
   1  -1  16 1705.96  791.04
   1   1  16 1637.95  325.37
   1  -1  17 2217.56  675.07
   1   1  17 1113.26  528.00
   1  -1  18 6892.43  927.03
   1   1  18 7906.63 1105.95
   1   1  19  162.52  153.14
   1  -1  19   27.37  300.65
   1   1  20  244.74  310.73
  -1   2  20 3889.26  468.17
  -1  -2  20 4235.66  503.34
  -1  -2  19  362.12  125.40
  -1   2  19  548.11  422.00
  -1   2  18  979.68  257.89
  -1  -2  18  681.41  421.59
  -1  -2  17 2323.79  739.84
  -1   2  17 3532.03  505.42
  -1  -2  16 3058.87  366.44
  -1   2  16 2466.30  638.68
  -1  -2  15  712.82  484.57
  -1   2  15   99.81  136.01
  -1  -2  15  405.19  218.37
  -1  -2  14 6164.79  514.78
  -1   2  14 7324.55 1005.71
  -1  -2  14 6849.96  568.39
  -1   2  14 5840.19  295.95
  -1  -2  13 1920.64  421.07
  -1   2  13 2732.01  679.49
  -1  -2  13 2628.62  415.28
  -1   2  13 1587.18  463.46
  -1  -2  1210046.56  889.86
  -1   2  1210643.52  956.90
  -1  -2  12 9778.92  879.25
  -1   2  1210862.44  848.39
  -1  -2  11 3610.15 1118.80
  -1   2  11 2955.76 1074.17
  -1   2  11 2492.49  363.19
  -1  -2  11 3886.65  780.40
  -1   2  11 4443.33  555.41
  -1  -2  1019529.82  872.78
  -1   2  1019778.59  884.01
  -1   2  1016237.73  970.72
  -1  -2  1017698.21 1129.66
  -1   2  1018602.89 1190.28
  -1  -2   9  126.88  203.93
  -1   2   9  749.56  224.25
  -1   2   9  262.47   85.71
  -1  -2   9  272.70  162.90
  -1   2   9  428.00  210.18
  -1  -2   820269.26 1199.08
  -1   2   822176.34 1234.71
  -1   2   820866.29 1117.99
  -1  -2   819892.00 1104.94
   1   2  -820808.12 1143.99
  -1   2   822253.00 1181.23
  -1  -2   7 3379.97  360.03
  -1   2   7 3438.95  783.56
  -1   2   7 3054.68  395.29
  -1  -2   7 3798.21  505.36
   1   2  -7 2692.47  266.16
  -1   2   7 2882.69  321.38
  -1  -2   619943.96 1110.45
  -1   2   619334.45 1066.54
  -1   2   618490.67  998.72
  -1  -2   619523.65 1083.32
   1   2  -619905.76 1075.95
  -1   2   619230.66 1036.16
   1  -2  -5 2781.06  336.27
  -1  -2   5 2322.35  202.73
  -1   2   5 3006.48  549.99
  -1  -2   5 2787.30  288.39
  -1   2   5 2947.92  246.23
  -1  -2   5 2598.50  191.68
   1   2  -5 2523.30  158.51
  -1   2   5 2534.20  189.04
  -1  -2   489394.48 2052.29
   1  -2  -490665.07 2072.14
  -1   2   486833.32 1990.07
  -1  -2   487408.96 2025.49
  -1   2   492010.41 2072.18
  -1  -2   489357.14 2138.73
   1   2  -491411.06 2076.62
  -1   2   486813.13 1959.53
  -1  -2   3   82.41  152.03
   1  -2  -3  205.24  150.82
  -1   2   3   50.52   51.43
  -1  -2   3   86.30   94.57
   1  -2  -3  137.52   75.03
  -1   2   3  181.10   68.14
  -1  -2   3  -15.75  156.89
   1   2  -3   78.41  129.39
  -1  -2   216202.44  843.07
   1  -2  -216104.13  845.03
  -1   2   215625.66  851.38
  -1  -2   215830.79  832.02
   1  -2  -216236.47  314.96
  -1   2   217121.75  496.65
  -1  -2   217052.49  501.20
   1   2  -215101.89  851.58
   1  -2  -1  567.09  111.64
  -1   2   1  180.33   66.46
  -1  -2   1  267.43   78.24
   1  -2  -1  182.41  141.74
  -1   2   1  243.82  152.08
  -1  -2   1  323.71  178.80
   1   2  -1   19.38  128.67
   1   2   0 5387.07  272.93
   1  -2   0 4903.31  298.82
  -1   2   0 4740.90  274.90
   1  -2   0 6102.02  361.78
  -1   2   0 5658.73  343.00
  -1  -2   0 5853.45  352.88
   1   2   0 5550.12  328.99
   1  -2   135115.20  829.62
  -1   2  -131820.61  758.66
   1   2   133319.59  746.26
   1  -2   133568.17  966.58
  -1   2  -132699.53  797.83
  -1  -2  -134498.37  825.05
   1   2   130846.88  801.40
   1  -2   238374.82  964.21
  -1   2  -238436.20  926.75
   1   2   238211.48  876.99
  -1  -2  -241751.67  966.85
   1  -2   240224.97  973.57
  -1   2  -237493.15  911.46
   1   2   241455.30  961.61
   1  -2   3  210.86  114.92
  -1   2  -3  251.82  197.97
   1   2   3  201.02   81.22
  -1  -2  -3  404.03  175.93
  -1  -2  -3  342.42  119.58
   1   2   3  412.01  111.47
   1  -2   3   26.75  131.91
  -1   2  -3   36.70  119.29
   1  -2   417422.79  535.44
  -1   2  -418349.54  533.85
   1   2   418440.82  539.18
  -1  -2  -418288.87  514.58
  -1  -2  -418433.19  477.14
   1   2   418119.34  452.99
   1  -2   418608.84  543.83
  -1   2  -418975.84  548.05
   1  -2   5 9617.20  656.17
   1   2   5 9632.96  565.95
  -1   2  -5 7881.33  500.91
  -1  -2  -5 8759.16  506.00
   1   2   5 9459.54  498.25
   1  -2   510475.73  715.42
  -1   2  -5 9480.16  522.05
   1   2   5 9569.73  503.28
   1  -2   616483.80  933.52
   1   2   617029.93 1062.50
  -1  -2  -616556.57  911.24
   1   2   616723.29  900.68
   1  -2   614012.28  787.31
  -1   2  -616986.15 1093.24
   1   2   616155.52  854.42
   1  -2   7 8330.15  688.80
   1   2   7 9011.07  344.08
   1   2   710590.40  611.47
   1  -2   710146.69  599.11
  -1   2  -710770.45  611.53
   1   2   710221.32  556.90
   1  -2   838249.74 1317.63
   1   2   833094.18 1133.86
   1   2   837132.45 1124.70
   1  -2   833376.99 1164.37
  -1   2  -833909.13 1114.56
   1   2   835918.17 1069.69
   1  -2   9  508.38  185.63
   1   2   9  122.07  144.83
   1   2   9   18.51   43.77
   1  -2   9   43.25   92.69
   1   2   9   13.33   64.04
  -1   2  -9   13.35   57.31
   1  -2  10 8488.35  646.71
   1   2  1010538.05 1246.85
   1   2  10 8792.60  569.54
   1  -2  10 9187.32  629.41
   1   2  10 8734.09  569.99
   1  -2  11   52.75  304.85
   1   2  11  112.64  161.16
   1   2  11   67.99   44.14
   1  -2  11  150.35  128.91
   1   2  11  102.85   63.87
   1  -2  1220928.25 1283.53
   1   2  1220363.95 1187.50
   1  -2  1220164.16 1087.66
   1   2  1222245.19 1136.73
   1  -2  13 1897.68 1020.69
   1   2  13  974.95  636.77
   1  -2  13 1585.39  468.10
   1  -2  14  965.16  332.91
   1   2  14  940.71  245.49
   1  -2  15  893.06  501.27
   1   2  15  515.96  292.34
   1   2  16 6021.76 1185.94
   1  -2  16 7429.79  825.56
   1  -2  17 1267.55  538.72
   1   2  17  937.66  639.28
   1  -2  18 1403.11  641.29
   1   2  18 1296.58  558.68
   1   2  19  266.14  169.12
   1  -2  19  550.25  343.12
   1   2  20 2307.13  918.80
  -1   3  20  402.53  617.29
  -1  -3  19 4838.82  800.81
  -1   3  19 6072.46 1041.64
  -1  -3  18 1262.26  933.43
  -1   3  18 1189.37  697.46
  -1  -3  17  624.28  232.55
  -1   3  17  274.94  239.47
  -1  -3  16  261.88  228.18
  -1   3  16  503.97  214.05
  -1  -3  15 7187.22  915.97
  -1   3  15 5154.29  532.91
  -1  -3  15 5381.11  694.04
  -1  -3  14  821.35  316.71
  -1   3  14 2330.09  518.85
  -1  -3  14  908.85  457.40
  -1   3  14 1340.39  358.17
  -1  -3  13  408.12  335.40
  -1   3  13  199.82  193.66
  -1  -3  13  569.48  331.80
  -1   3  13  177.55  180.69
  -1   3  12 2347.90  743.30
  -1  -3  12 1577.82  668.27
  -1   3  12 2341.26  281.45
  -1   3  1132838.33 2225.24
  -1  -3  1133503.84 1910.40
  -1   3  1134095.38 1849.29
  -1   3  10 1988.63  257.95
  -1   3  10 2037.16  464.37
  -1  -3  10 2668.23  307.60
  -1   3  10 2363.20  243.54
  -1  -3   9 3724.59  455.76
  -1   3   9 4534.26  604.08
  -1   3   9 2912.18  588.36
  -1  -3   9 4680.17  492.95
  -1   3   9 4278.88  492.56
  -1  -3   8 1219.82  284.54
  -1   3   8 1021.71  234.77
  -1   3   8 1011.88  253.85
  -1  -3   8 1692.66  508.65
  -1   3   8 1406.78  303.48
  -1  -3   736248.96 1256.13
  -1   3   738252.53 1292.77
  -1   3   734172.73 1164.40
  -1  -3   734966.20 1255.40
  -1   3   736221.93 1196.20
   1  -3  -612698.46  761.63
  -1   3   610989.23  684.83
  -1   3   610527.57  628.66
  -1  -3   611509.65  737.07
   1   3  -611095.44  643.46
  -1   3   610802.94  615.98
   1  -3  -5 2259.70  689.06
  -1   3   5 2111.19  443.70
  -1  -3   5 1986.36  531.57
   1   3  -5 1652.63  438.08
  -1   3   5 1889.18  357.16
  -1  -3   5 3002.08  602.88
   1   3  -5 1433.44  367.50
  -1   3   5 1846.91  270.05
   1  -3  -4 4938.03  366.07
  -1   3   4 4345.20  290.53
  -1  -3   4 4938.20  336.06
   1   3  -4 3664.61  249.22
   1  -3  -4 4650.79  321.62
  -1   3   4 3886.56  318.25
  -1  -3   4 4693.80  464.54
   1   3  -4 4388.03  328.72
   1  -3  -324926.84  649.39
  -1   3   326765.72  669.21
  -1  -3   326828.83  714.97
   1   3  -326910.32  677.44
   1  -3  -325546.53  844.06
  -1   3   326566.08  709.32
  -1  -3   324429.00  790.85
   1   3  -324837.56  683.29
   1  -3  -2 8473.39  501.28
  -1   3   2 7927.36  428.44
  -1  -3   2 8702.32  469.92
   1   3  -2 8484.14  544.14
   1  -3  -2 8585.46  556.38
  -1   3   2 8367.60  568.13
  -1  -3   2 9209.94  559.70
   1   3  -2 8664.46  530.13
   1  -3  -112877.24  674.45
  -1   3   113276.58  688.08
  -1  -3   114371.92  733.24
   1  -3  -114183.64  772.70
  -1   3   115036.37  859.62
  -1  -3   112161.62  687.86
   1   3  -113182.84  728.54
   1  -3   023205.43  583.75
  -1   3   022388.66  573.87
   1  -3   023110.40  653.12
  -1   3   020908.89  623.02
  -1  -3   020948.60  635.31
   1   3   023074.09  629.12
   1  -3   193603.16 2083.66
  -1   3  -193480.16 2085.60
   1  -3   193138.39 2190.33
  -1   3  -192174.91 2099.57
  -1  -3  -193448.22 2120.95
   1   3   191730.20 2068.84
   1   3   229286.50  682.80
   1  -3   228733.38  760.47
  -1   3  -226933.90  741.38
  -1  -3  -228061.00  719.59
   1  -3   228660.20  763.22
  -1   3  -229289.32  802.51
   1   3   229261.68  726.03
   1   3   3 1309.82  329.29
   1  -3   3  982.64  347.95
  -1   3  -3 1159.77  318.13
   1   3   3  868.26  220.48
  -1  -3  -3 1059.94  262.40
   1  -3   3 1133.12  370.84
   1   3   3 1263.24  280.45
  -1   3  -3  934.52  450.34
   1   3   4 7305.94  413.40
   1  -3   4 7517.66  521.08
  -1   3  -4 7730.65  480.30
   1   3   4 8595.64  476.58
  -1  -3  -4 8497.45  491.22
   1   3   4 9772.63  551.94
   1  -3   4 8027.57  495.63
  -1   3  -4 8478.12  505.32
   1   3   574502.86 2261.53
   1  -3   575414.58 2331.23
   1   3   568626.37 2091.72
  -1  -3  -578269.27 2338.30
   1   3   573204.77 2202.38
   1  -3   573100.68 2264.45
  -1   3  -571576.93 2198.21
   1   3   6  293.01  159.12
   1  -3   6  339.58  224.78
   1   3   6   62.26  110.01
   1   3   6    6.28   73.79
   1  -3   6  156.41  107.32
  -1   3  -6  107.62   54.31
   1   3   6   55.62   83.77
   1   3   713692.88  802.25
   1   3   714906.22  846.12
   1  -3   714021.00 1216.96
  -1   3  -713449.62  750.54
   1   3   712775.27  689.17
   1   3   8 3347.11  259.31
   1   3   8 3395.73  204.14
   1  -3   8 4021.77  483.51
  -1   3  -8 3791.47  345.84
   1   3   8 3975.79  321.84
   1   3   938121.32 1445.47
   1   3   939261.71 1362.80
   1  -3   935467.92 1431.04
  -1   3  -939406.78 1437.04
   1   3   937227.14 1303.85
   1  -3  10 7554.05  738.35
   1   3  10 8510.97  802.21
   1   3  10 7596.91  538.52
   1  -3  10 8064.01  589.01
   1   3  10 7261.07  485.13
   1  -3  11 1224.89  341.59
   1   3  11  616.42  171.78
   1   3  11  610.74  195.17
   1  -3  11  511.76  254.49
   1   3  11  487.20  176.96
   1  -3  12  -51.09  200.92
   1   3  12  544.02  242.77
   1  -3  12  104.97  123.59
   1   3  12   52.84   61.06
   1  -3  1310120.09 1410.90
   1   3  13 9401.55  808.35
   1  -3  13 7677.04  563.05
   1  -3  14 2000.97  627.03
   1   3  14 1858.85  729.67
   1  -3  14 1412.63  338.02
   1  -3  15 1852.78  269.72
   1   3  15 1383.18  264.07
   1  -3  16  615.77  507.32
   1   3  16  518.52  274.06
   1  -3  17 2509.92  830.34
   1   3  17 4877.14 1159.56
   1  -3  18 2580.84  639.77
   1   3  18 1498.45  531.10
   1   3  19  180.90  329.19
   1  -3  19  787.61  441.71
   1   3  20  552.51  344.29
  -1   4  20  347.06  260.02
  -1  -4  19  647.99  200.54
  -1   4  19 1395.27  262.07
  -1  -4  18 1075.69  553.82
  -1   4  18  380.70  390.97
  -1   4  17 4976.88  877.40
  -1   4  16 2192.16  785.57
  -1  -4  15  888.73  548.32
  -1   4  15  514.24  303.77
  -1  -4  15  469.62  280.95
  -1  -4  14 2861.13 1143.56
  -1   4  14 2662.54  372.82
  -1  -4  14 2429.34  436.65
  -1  -4  13 8063.58  936.76
  -1   4  1310238.62  953.56
  -1  -4  13 8249.54  621.22
  -1   4  13 8153.22  609.85
  -1  -4  12 3050.98  834.04
  -1   4  12 2421.90  486.38
  -1  -4  12 2435.02  733.13
  -1   4  12 2695.55  398.05
  -1  -4  11 4689.00  456.63
  -1   4  11 3900.80  604.01
  -1  -4  11 4656.76  629.17
  -1   4  11 4169.64  419.47
  -1  -4  10 1952.21  460.98
  -1   4  10 1202.45  576.66
  -1  -4  10 1326.34  553.71
  -1   4  10 1701.90  235.16
  -1  -4   918582.89 1304.63
  -1   4   919949.26  827.29
  -1   4   919116.63  786.43
  -1  -4   918916.17  704.58
  -1   4   922232.19  862.70
  -1  -4   8  497.56  216.59
  -1   4   8  727.07  246.79
  -1   4   8  336.93  112.34
  -1  -4   8  863.05  188.85
  -1   4   8  799.91  467.19
  -1  -4   7 5736.86  541.54
  -1   4   7 6025.56  448.96
  -1   4   7 4979.48  370.87
  -1  -4   7 6448.40  849.43
  -1   4   7 7039.47  515.70
   1  -4  -6 5646.85  475.93
  -1   4   6 4728.77  368.59
  -1  -4   6 5973.56  475.68
  -1   4   6 7039.41  512.97
  -1  -4   6 6184.23  772.21
  -1   4   6 6018.34  479.90
   1  -4  -549483.29 1667.98
  -1   4   544756.38 1446.76
  -1  -4   547812.07 1537.22
   1   4  -548235.76 1520.91
   1  -4  -550694.83 1630.07
  -1   4   546777.42 1528.94
  -1  -4   547179.86 1566.74
   1  -4  -4 6091.40  392.15
  -1   4   4 4608.54  294.17
  -1  -4   4 5433.70  431.53
   1   4  -4 5491.65  512.20
   1  -4  -4 4992.60  578.19
  -1   4   4 4885.01  331.28
  -1  -4   4 5736.01  521.95
   1   4  -4 5065.91  367.29
   1  -4  -3   16.08  145.56
  -1   4   3   -0.97   93.62
  -1  -4   3  119.82   78.70
   1   4  -3  151.72  157.24
   1  -4  -3  227.08  150.52
  -1  -4   3  175.40  142.90
   1   4  -3  328.92  167.67
   1  -4  -2 5376.96  325.32
  -1   4   2 5779.79  418.25
  -1  -4   2 4954.36  300.98
   1   4  -2 5209.75  411.15
   1  -4  -2 5813.09  445.97
  -1   4   2 5180.99  392.21
  -1  -4   2 5463.45  403.59
   1   4  -2 4585.64  594.42
   1  -4  -125501.43  690.94
  -1   4   125863.65  657.52
  -1  -4   125863.68  629.21
   1   4  -126509.95  620.80
   1  -4  -127452.33  768.68
  -1   4   124900.81  727.83
   1   4  -125435.26  758.76
   1  -4   018265.29  485.43
  -1  -4   018193.44  414.64
  -1   4   018650.71  491.57
  -1   4   017063.39  523.41
  -1  -4   018807.69  657.28
   1   4   017042.80  582.68
   1  -4   115461.52  844.93
  -1   4  -115068.68  790.17
   1  -4   116702.25  577.61
  -1   4  -115834.48  881.07
  -1  -4  -115215.80 1035.07
   1   4   114568.97  807.22
   1   4   212849.20  646.56
   1  -4   212747.60  699.22
  -1   4  -213398.34  727.33
   1   4   214259.11  736.67
  -1  -4  -213598.84  747.93
   1  -4   213337.81  791.44
  -1   4  -215038.50 1146.68
   1   4   214425.19  786.84
   1   4   342280.70  992.34
   1  -4   345528.74 1114.28
  -1   4  -345384.69 1135.02
   1   4   346019.08 1085.08
   1  -4   345083.37 1219.49
   1   4   346318.79 1163.80
  -1   4  -343990.38 1107.12
   1   4   4 5910.89  427.89
   1  -4   4 5616.10  504.91
  -1   4  -4 6021.33  457.73
   1   4   4 6623.68  468.67
  -1  -4  -4 4639.31  352.09
   1  -4   4 6259.71  597.06
   1   4   4 5339.28  495.28
  -1   4  -4 5798.71  653.96
   1   4   5 3848.84  313.42
   1  -4   5 4904.28  440.93
   1   4   5 4684.25  391.01
  -1  -4  -5 4597.16  370.35
   1   4   5 3615.91  403.41
   1  -4   5 5103.51  435.43
  -1   4  -5 3346.82  404.81
   1   4   610484.40  684.95
   1  -4   613894.31  820.10
   1   4   612943.37  735.70
  -1  -4  -611877.18  328.15
   1   4   612006.41  287.32
   1  -4   611735.29  415.82
  -1   4  -611797.01  703.22
   1  -4   723088.86  868.27
   1   4   725511.02  862.01
   1   4   724320.08  763.45
   1  -4   724999.25  896.49
   1   4   725146.63  785.43
   1  -4   814979.34  956.82
   1   4   817017.10 1345.56
   1   4   813425.57  808.12
   1  -4   814380.14 1025.90
   1   4   816026.17  974.70
   1  -4   9 4333.41  984.24
   1   4   9 2795.43  290.09
   1   4   9 2945.96  434.84
   1  -4   9 3707.43  445.91
   1   4   9 3556.70  357.48
   1  -4  10 1824.03  360.75
   1   4  10 2212.09  470.38
   1   4  10 1241.81  293.18
   1  -4  10 1816.79  468.27
   1   4  10 1513.28  303.42
   1   4  1125273.54 1391.41
   1  -4  1121332.11 1204.52
   1   4  1121631.05 1120.87
   1   4  12  272.45  281.76
   1  -4  12   46.89  106.62
   1   4  12  304.91  127.13
   1   4  13 1801.58  204.37
   1  -4  13 1723.92  488.44
   1  -4  14  270.56  386.95
   1   4  14  257.87  137.71
   1  -4  14  165.98  146.94
   1  -4  15 5642.67  725.43
   1   4  15 6861.85  818.58
   1  -4  16 2405.41  649.69
   1   4  16 2327.14  473.65
   1  -4  17 1541.09  838.59
   1   4  17 1525.89  317.00
   1  -4  18  462.74  361.16
   1   4  18  331.44  280.89
   1  -4  19 4316.66 1323.98
   1   4  19 2430.54  575.16
   1   4  20  644.88  470.52
  -1   5  20 1208.41  467.58
  -1  -5  19   52.80  343.42
  -1  -5  18 7477.44 1495.59
  -1   5  18 7058.07 1348.93
  -1  -5  17  684.32  519.36
  -1   5  17  810.57  476.12
  -1  -5  16 6386.65  862.02
  -1   5  16 5862.75  711.08
  -1  -5  15  477.51  117.00
  -1   5  15 1226.59  333.14
  -1  -5  15  735.66  394.12
  -1  -5  14 7086.95  925.95
  -1   5  1410055.65  539.11
  -1  -5  14 8624.14  511.72
  -1  -5  13  688.86  492.60
  -1   5  13  319.26  152.67
  -1  -5  13  577.62  222.03
  -1   5  13  520.41  238.32
  -1  -5  12 1587.83  803.02
  -1   5  12 2287.03  507.01
  -1  -5  12 1583.34  619.53
  -1   5  12 2001.91  262.14
  -1  -5  11 2515.63  578.02
  -1   5  11 1356.30  434.20
  -1  -5  11 1152.30  768.06
  -1   5  11 1992.55  542.90
  -1  -5  1020795.08 1462.37
  -1   5  1024132.87 1368.28
  -1  -5  1022738.29 1367.29
  -1   5  1025501.99 1490.20
  -1  -5   9 2377.53  968.03
  -1   5   9 2392.51  554.21
  -1  -5   9 2542.25  608.54
  -1   5   9 2658.27  474.73
  -1  -5   827379.21 1151.13
  -1   5   823243.51 1091.62
  -1  -5   825807.84 1077.86
  -1   5   826858.79 1124.46
  -1  -5   7  528.04  246.42
  -1  -5   7  566.76  360.28
   1  -5  -671909.51 2196.53
  -1   5   667628.68 2035.20
  -1  -5   670760.90 2149.48
   1  -5  -668973.01 2095.05
  -1  -5   666496.61 2078.94
   1  -5  -5 3020.43  356.50
  -1   5   5 3334.37  263.75
  -1  -5   5 3718.56  383.88
   1  -5  -5 3997.07  705.96
  -1   5   5 3144.13  404.95
  -1  -5   5 3749.85  432.48
   1  -5  -420270.23 1096.53
  -1   5   419305.96 1037.24
  -1  -5   419363.10 1069.84
   1   5  -421300.96 1143.66
   1  -5  -420176.37 1119.60
  -1   5   421005.12 1161.84
  -1  -5   421547.30 1212.23
   1  -5  -3 3567.58  426.76
  -1   5   3 3552.12  278.56
  -1  -5   3 4394.44  531.38
   1   5  -3 4102.29  324.58
   1  -5  -3 3593.47  332.80
  -1   5   3 3768.70  353.25
  -1  -5   3 5493.97  535.20
   1  -5  -266517.79 1516.95
  -1   5   268150.53 1556.10
  -1  -5   265791.05 1532.44
   1   5  -265757.12 1496.72
   1  -5  -269883.77 1692.98
  -1  -5   271186.48 1768.02
   1   5  -268394.46 1681.03
   1  -5  -1 1778.11  151.39
  -1   5   1 1908.75  134.54
  -1  -5   1 1786.16  149.53
   1   5  -1 1950.77  119.83
   1  -5  -1 1543.74  627.62
  -1   5   1 2220.39  489.28
  -1  -5   1 1735.83  664.61
   1   5  -1 1935.40  554.45
   1  -5   0  160.18   90.85
  -1  -5   0   96.37   85.25
  -1   5   0   94.41  100.75
   1   5   0  153.29   31.92
   1  -5   0  190.20  263.47
  -1  -5   0  276.56  186.52
  -1   5   0  282.15  192.89
   1   5   0  226.54  133.05
   1  -5   1  189.02  120.46
  -1   5  -1  -12.60  117.83
   1  -5   1   -6.97  245.26
  -1  -5  -1  221.99  217.51
  -1   5  -1  145.45  177.76
   1   5   1  122.85  106.02
   1   5   232015.08  952.46
   1  -5   233379.73 1081.56
  -1   5  -231462.94 1010.15
   1   5   232002.75  957.07
  -1  -5  -232105.77 1077.75
   1  -5   229809.34 1225.05
   1   5   235606.59 1166.41
  -1   5  -231098.74 1088.86
   1   5   365842.14 1957.87
   1  -5   364196.91 1999.97
  -1   5  -365405.01 2023.72
   1   5   366864.90 1989.66
   1  -5   366097.67 2124.92
   1   5   4 4194.49  345.17
   1  -5   4 4438.28  415.46
  -1   5  -4 3912.67  334.32
   1   5   4 3721.44  291.44
  -1  -5  -4 4315.90  360.49
   1  -5   4 4013.67  554.68
   1   5   4 3723.29  315.65
   1   5   5   39.96   97.03
   1  -5   5  164.28  207.43
   1   5   5  159.53  163.67
  -1  -5  -5   49.26  111.98
   1  -5   5  279.41  234.27
   1   5   5  328.03   91.91
   1   5   626672.19  867.83
  -1  -5  -626468.83  850.64
   1   5   626879.47  874.83
   1  -5   625978.00  953.34
   1  -5   7  353.41  250.98
   1   5   7   74.20  179.29
  -1  -5  -7   45.22  132.70
   1   5   7  293.46  103.90
   1  -5   7  456.10  166.96
   1  -5   8 1975.13  582.81
   1   5   8 2384.09  347.24
   1   5   8 1638.99  232.28
   1  -5   8 2410.47  296.02
   1   5   8 2322.07  387.22
   1  -5   9 5440.79  638.56
   1   5   9 5651.24  733.62
   1   5   9 5085.72  489.85
   1  -5   9 5362.07  736.74
   1   5   9 5748.45  424.80
   1  -5  1028269.67 1714.69
   1   5  1023567.96 1355.93
   1   5  1023833.99 1315.13
   1  -5  1026357.76 1507.15
   1   5  1027915.35 1511.49
   1  -5  11  548.02  279.50
   1   5  11  328.05  236.03
   1  -5  11  138.71   99.05
   1   5  11   13.98   64.57
   1  -5  12 4877.17  468.89
   1   5  12 6736.66  622.09
   1  -5  12 4850.99  367.44
   1  -5  13  175.70  287.72
   1   5  13  174.05  126.44
   1  -5  13  250.59  189.60
   1  -5  1413081.38 1445.71
   1   5  1413871.56 1541.03
   1  -5  1411710.52  835.45
   1  -5  15 1646.98  322.33
   1   5  15  991.42  266.24
   1   5  16 1643.59  515.36
   1   5  17  361.01  136.39
   1   5  18 3166.95 1029.28
   1  -5  19  605.22  440.28
   1   5  19  600.17  182.72
   1   5  20  178.84  282.66
  -1   6  20  649.11  267.28
  -1  -6  19  732.89  783.85
  -1   6  19  433.50  139.89
  -1  -6  18 1549.29  958.27
  -1   6  18 1527.32  790.80
  -1  -6  17 5353.47 1101.17
  -1   6  17 5617.01  496.23
  -1  -6  16 4971.21  667.16
  -1   6  16 5479.75 1028.31
  -1  -6  16 4482.98  924.27
  -1  -6  15  542.90  245.21
  -1  -6  15  221.19  124.21
  -1   6  14 5779.42  484.26
  -1  -6  14 4722.57  431.40
  -1  -6  1314167.21 1297.31
  -1   6  1311149.73  524.72
  -1  -6  1312828.76 1450.17
  -1   6  1313960.79  860.29
  -1  -6  1213216.15  864.13
  -1   6  1213659.10 1506.33
  -1  -6  1211169.22 1100.75
  -1   6  12 9141.36  684.17
  -1  -6  11  688.04  774.56
  -1   6  11 1191.26  238.98
  -1  -6  11 1237.06  589.49
  -1   6  11 1611.53  415.16
  -1  -6  1014680.61 1148.87
  -1   6  1015259.71 1081.38
  -1  -6  1013775.57  975.87
  -1   6  1016013.08  701.12
  -1  -6   9 3721.94  631.42
  -1   6   9 4241.27  493.17
  -1  -6   9 4695.35 1098.53
  -1   6   9 4105.01  346.24
  -1  -6   8 9727.22  943.73
  -1   6   810183.51  717.74
  -1  -6   810127.74  774.00
  -1   6   810595.05  934.75
  -1  -6   7  190.87  153.68
   1  -6  -7  462.29  150.29
  -1  -6   7  431.48  174.81
   1  -6  -6  169.88  104.20
  -1   6   6  136.73   55.29
  -1  -6   6  173.76  161.74
   1  -6  -6  344.29  201.78
  -1  -6   6  449.48  351.65
   1  -6  -519842.18 1075.22
  -1   6   517563.58  960.42
  -1  -6   518558.32 1042.14
   1  -6  -521615.84 1216.59
  -1  -6   518377.58 1096.00
   1  -6  -414236.91  810.50
  -1   6   415343.70  830.57
  -1  -6   414789.95  841.56
   1   6  -413915.76  772.43
   1  -6  -416038.28  938.96
  -1  -6   415726.35  968.97
   1  -6  -316755.35  915.22
  -1   6   315617.23  832.48
  -1  -6   316023.81  877.09
   1   6  -317066.28  944.19
   1  -6  -316607.32  958.30
  -1  -6   317294.84 1032.15
   1  -6  -2  740.84  320.72
  -1   6   2  768.97  178.21
  -1  -6   2  852.18  174.05
   1   6  -2  552.00  241.57
   1  -6  -2 1107.28  565.07
  -1  -6   2  470.94  501.42
   1  -6  -136758.01 1159.80
  -1   6   138794.50 1194.60
  -1  -6   136997.50 1150.78
   1   6  -138372.28 1171.33
  -1  -6   141743.75 1426.49
  -1  -6   052579.84 1559.69
   1  -6   053147.73 1638.06
  -1   6   053475.85 1629.28
   1   6   053350.59 1581.80
   1  -6   055241.19 1940.01
  -1  -6   054595.61 1776.50
   1  -6   1 4520.22  506.93
  -1   6  -1 4126.24  344.23
   1  -6   1 4060.63  384.12
  -1  -6  -1 3810.43  486.88
   1   6   2 2524.46  188.87
   1  -6   2 2481.40  257.38
  -1   6  -2 2614.27  283.49
   1   6   2 2349.00  182.40
   1  -6   2 3324.68  486.29
  -1  -6  -2 2385.54  357.50
   1   6   2 2812.39  644.61
   1   6   340394.33 1227.27
   1  -6   339572.75 1277.06
  -1   6  -338845.12 1235.04
   1   6   340634.10 1229.30
  -1  -6  -339734.10 1340.60
   1  -6   340925.27 1390.75
   1   6   341228.02 1361.31
   1   6   421779.47 1132.45
   1  -6   420444.31 1131.31
   1   6   420827.38 1097.66
  -1  -6  -419414.32 1252.17
   1  -6   420909.38 1275.47
   1   6   423096.38  822.67
   1   6   516457.29  881.28
   1  -6   515252.46  957.44
   1   6   517002.87  921.22
  -1  -6  -517371.49  959.01
   1  -6   516073.18 1074.19
   1   6   516356.50  907.27
   1   6   6 8509.41  313.96
   1  -6   6 8724.26  642.64
   1   6   610001.67  677.95
  -1  -6  -6 9765.30  661.09
   1   6   6 8422.15  593.11
   1  -6   6 9367.17  873.46
   1  -6   714236.57  912.73
   1   6   714108.59  853.09
  -1  -6  -714763.94  961.06
   1   6   714068.35  854.54
   1  -6   714481.77  957.82
   1  -6   810409.65  911.09
   1   6   810523.08  718.46
  -1  -6  -810182.56  769.83
   1   6   810842.93  729.91
   1  -6   810620.62  798.06
   1  -6   9  239.85  199.55
   1   6   9  140.00  205.10
   1  -6   9  845.64  248.21
   1   6   9  245.18  168.69
   1   6   9  425.76  177.53
   1  -6  10  696.04  962.34
   1   6  10 1502.44  630.23
   1  -6  10 1559.84  488.46
   1   6  10 1203.47  235.32
   1   6  10 1801.24  374.03
   1  -6  11 2355.53  696.17
   1   6  11 2634.84  763.34
   1  -6  11 2211.51  754.11
   1   6  11 1581.17  247.14
   1  -6  12  280.86  312.97
   1   6  12  144.11  112.36
   1  -6  12  155.26   88.48
   1  -6  13  202.85  234.92
   1   6  13  146.01  152.05
   1  -6  13  920.88  486.67
   1  -6  14 2319.44  449.43
   1   6  14 2449.88  489.18
   1  -6  14 1315.28  763.07
   1  -6  15 5648.08 1825.11
   1   6  15 5946.84  752.94
   1  -6  16 4400.48  748.03
   1   6  16 4309.84  492.01
   1  -6  17  444.72  756.71
   1   6  17  923.78  519.04
   1  -6  18  380.61  423.67
   1   6  18  406.08  250.78
   1   6  19 3532.61  570.41
  -1   7  19  924.93  750.78
  -1  -7  18  422.30  269.18
  -1   7  18  688.04  201.29
  -1  -7  17  325.65  267.58
  -1  -7  16 1570.47  436.16
  -1   7  16  602.25  170.76
  -1  -7  16  515.12  204.82
  -1  -7  1513182.80 1085.86
  -1   7  1513545.34 1099.33
  -1  -7  15 8884.54 1228.12
  -1  -7  14  374.86  396.48
  -1   7  14  432.72  210.40
  -1  -7  14  -33.98  117.72
  -1  -7  13  275.29  398.20
  -1   7  13   84.10  144.22
  -1  -7  13  356.72  192.37
  -1   7  13   23.04  121.89
  -1  -7  12  704.99  642.21
  -1   7  12  255.86   94.53
  -1  -7  12  242.82  253.98
  -1   7  12   54.18   83.94
  -1  -7  1110802.14  898.46
  -1   7  11 9784.62  943.31
  -1  -7  1110416.71  955.29
  -1   7  11 9447.69  722.37
  -1  -7  10  394.13  364.36
  -1   7  10  306.18  127.21
  -1  -7  10  209.26  219.39
  -1   7  10   31.87  172.32
  -1  -7   9 1131.82  238.72
  -1   7   9  558.81  191.10
  -1  -7   9  541.87  269.33
  -1   7   9  306.11  249.45
  -1  -7   8 1887.43  271.32
  -1   7   8 2636.20  583.78
   1  -7  -8 1480.76  358.39
  -1  -7   8 1039.05  556.87
  -1  -7   728280.77 1228.08
   1  -7  -727008.16 1188.96
  -1  -7   728612.40 1311.11
   1  -7  -6  388.65  404.05
  -1   7   6  622.66  105.06
  -1  -7   6  523.00  218.29
   1  -7  -6  914.99  238.82
  -1  -7   6  957.98  306.14
   1  -7  -5  362.44   98.73
  -1   7   5  386.35  176.69
  -1  -7   5  356.51  321.35
   1  -7  -5  428.97  181.64
  -1  -7   5  456.98  286.77
   1  -7  -4 5010.72  401.24
  -1   7   4 4674.15  352.03
  -1  -7   4 5744.99  423.24
   1   7  -4 4695.56  345.50
   1  -7  -4 4167.95  711.95
  -1  -7   4 5578.85  733.14
   1  -7  -316568.42  927.12
  -1   7   314934.90  809.43
  -1  -7   316094.97  879.50
   1   7  -316654.92  891.15
   1  -7  -317928.16 1052.47
  -1  -7   317296.64 1210.43
   1  -7  -217267.23  924.07
  -1   7   216606.25  905.54
  -1  -7   216580.49  890.34
   1   7  -216438.09  871.45
   1  -7  -215505.31  955.64
  -1  -7   215609.74  996.13
   1  -7  -110629.52  736.92
  -1  -7   1 8782.95  561.70
  -1   7   1 9408.12  607.70
   1   7  -1 8990.51  577.83
   1  -7  -1 8508.44  708.85
  -1  -7   012275.46  644.43
   1  -7   012775.78  737.15
  -1   7   012463.08  699.33
   1   7   012216.75  641.18
   1  -7   011504.61  844.46
  -1  -7   010837.33  678.73
   1  -7   165925.41 1942.86
  -1   7  -164756.34 1901.39
   1  -7   161139.61 2143.64
  -1  -7  -162874.26 2020.96
   1  -7   2  816.31  268.84
  -1   7  -2  503.97  167.67
  -1  -7  -2  547.58  427.35
   1  -7   2  538.05  352.75
   1   7   3 1373.76  118.86
   1  -7   3 1883.52  246.69
  -1   7  -3  754.31  270.70
   1   7   3 1061.30  173.61
  -1  -7  -3 1037.36  314.91
   1  -7   3  971.96  513.29
   1   7   4  830.99  167.83
   1  -7   4 1279.52  372.36
   1   7   4  925.02  130.79
  -1  -7  -4  697.78  169.27
   1  -7   4 1510.11  603.42
   1   7   528082.75  997.08
   1  -7   528250.14 1167.42
   1   7   530486.77 1114.13
  -1  -7  -529499.87 1157.33
   1  -7   528854.34 1232.28
   1   7   6  206.16  116.05
   1  -7   6  557.12  248.47
   1   7   6   81.26  181.77
  -1  -7  -6  147.07  132.53
   1  -7   6  112.55  190.13
   1   7   7 2322.92  279.72
   1  -7   7 3075.49  941.83
   1   7   7 2947.37  192.28
  -1  -7  -7 2643.85  627.06
   1  -7   7 2802.13  305.45
   1  -7   8  341.76  367.52
   1   7   8  119.93  209.97
  -1  -7  -8  516.09  219.87
   1  -7   8  213.56  122.20
   1  -7   925150.56 1423.07
   1   7   922504.26 1214.46
   1  -7   924397.11 1418.91
   1  -7  10 2038.71  593.04
   1   7  10 1270.48  174.23
   1   7  10  968.44  227.07
   1  -7  11 7504.22  635.83
   1   7  11 8222.68  754.04
   1  -7  11 8445.20 1175.91
   1   7  11 8984.23  988.40
   1  -7  12  574.19  311.54
   1   7  12  176.86  154.46
   1  -7  12  310.30  243.89
   1  -7  1320648.29 1329.36
   1   7  1322447.24 1473.98
   1  -7  1324172.32 1474.97
   1  -7  14  215.49  252.32
   1   7  14  328.67  144.12
   1  -7  14  162.97   78.66
   1  -7  15 2712.77 1049.93
   1   7  15 2392.73  582.92
   1  -7  16  179.28  370.88
   1   7  16  272.67  253.93
   1  -7  17 8032.28 1082.94
   1   7  17 6147.03  983.68
   1  -7  18  242.99  332.90
   1   7  18  260.31  304.92
  -1  -8  18  586.64  392.29
  -1   8  18  400.28  357.08
  -1  -8  17 2171.41  367.95
  -1   8  17 1089.46  652.00
  -1  -8  16 3036.68 1208.37
  -1   8  16 4537.60  668.49
  -1  -8  16 1869.84  829.72
  -1  -8  15  159.31  244.22
  -1   8  15  265.85  202.35
  -1  -8  15  290.81  401.39
  -1  -8  14 4650.48 1289.28
  -1   8  14 5289.68  551.55
  -1  -8  14 4470.73  584.86
  -1  -8  13 3599.34  449.93
  -1   8  13 5513.71  617.00
  -1  -8  13 6746.40 1471.84
  -1  -8  12 9808.32  892.38
  -1   8  12 9053.59  894.85
  -1  -8  12 9430.52  867.00
  -1   8  12 8958.99  645.04
  -1  -8  11 1616.53  489.04
  -1   8  11 1525.65  255.94
  -1  -8  11 1243.74  627.23
  -1   8  11 1947.12  223.10
  -1  -8  10 1207.78  446.48
  -1   8  10  589.49  129.91
  -1  -8  10  601.97  430.95
  -1   8  10 1163.24  417.99
  -1  -8   9  616.29  345.32
  -1   8   9  249.41  192.47
   1  -8  -9  537.49  245.59
  -1  -8   9  404.14  144.18
  -1  -8   813457.02  856.47
  -1   8   815194.33  950.20
   1  -8  -815313.59  994.92
  -1  -8   814681.79 1000.61
  -1  -8   7   -1.13   95.59
   1  -8  -7 -172.83  131.74
  -1  -8   7  247.48  294.03
   1  -8  -6 4665.37  591.27
  -1   8   6 3799.54  442.30
  -1  -8   6 3925.96  407.91
   1  -8  -6 4804.23  538.24
  -1  -8   6 4339.12  486.98
   1  -8  -511419.49  706.55
  -1   8   510717.75  672.76
  -1  -8   511662.33  756.38
   1  -8  -511864.68  827.05
  -1  -8   511896.97 1127.81
   1  -8  -414630.53  881.60
  -1   8   415332.57  893.50
  -1  -8   414700.23  905.21
   1   8  -414824.03  889.00
   1  -8  -414798.90 1031.99
  -1  -8   416427.88 1162.17
   1  -8  -3 3075.15  379.41
  -1   8   3 2314.52  177.32
  -1  -8   3 3390.09  232.37
   1   8  -3 2852.73  168.29
   1  -8  -3 3583.21  401.76
  -1  -8   3 3515.49  553.01
   1  -8  -210935.15  706.97
  -1   8   210514.45  665.82
  -1  -8   210466.35  693.94
   1   8  -210071.48  640.96
   1  -8  -211155.31  833.20
  -1  -8   211175.26  868.62
   1  -8  -112797.42  762.14
  -1  -8   112856.47  685.89
  -1   8   112373.00  676.61
   1   8  -112361.08  660.76
   1  -8  -114605.22  940.96
  -1  -8   012914.55  680.24
   1  -8   014093.57  809.60
  -1   8   012340.96  698.65
   1   8   012331.64  639.99
  -1  -8   012814.64  816.83
   1  -8   1 1774.83  495.96
  -1   8  -1 1156.00   92.83
   1  -8   1 1537.06  401.47
  -1  -8  -1  949.10  837.80
   1  -8   2 2033.80  321.92
  -1   8  -2 1667.60  241.07
  -1  -8  -2 2719.28  540.00
   1  -8   2 1731.14  867.93
   1   8   3 6850.98  570.82
   1  -8   3 6714.20  733.31
   1   8   3 6662.90  553.77
  -1  -8  -3 6626.13 1042.87
   1  -8   3 8980.23 1319.94
   1   8   4 9224.71  549.82
   1  -8   410052.69  737.84
   1   8   4 8877.95  533.13
  -1  -8  -4 9075.68  690.48
   1  -8   4 9671.15  716.29
   1   8   5    7.87   52.53
   1  -8   5  133.06  202.64
   1   8   5  147.74  122.18
  -1  -8  -5  125.74  203.63
   1  -8   5   52.32  140.81
   1   8   6 8515.11  609.55
   1  -8   6 9333.85  696.15
   1   8   6 8540.84  583.88
  -1  -8  -6 8216.25  675.19
   1  -8   6 8173.13  810.90
   1   8   711599.39  714.58
   1  -8   710216.17  667.90
   1   8   713281.00  772.90
  -1  -8  -710923.32  745.98
   1  -8   710311.13  811.24
   1  -8   813921.36 1065.39
   1   8   816960.29  948.53
  -1  -8  -812817.85  893.54
   1  -8   816189.45 1302.64
   1  -8   9  515.30  341.98
   1   8   9  255.01  114.32
  -1  -8  -9  118.52  179.06
   1  -8   9  354.65  312.46
   1  -8  10  857.98  348.00
   1   8  10  680.30  184.86
   1  -8  10  602.66  273.37
   1   8  10  290.66  162.82
   1  -8  11 4072.98 1191.54
   1   8  11 4523.23  502.48
   1  -8  11 2776.54  643.32
   1   8  11 3207.10  473.82
   1  -8  12 2110.01  920.34
   1   8  12 3158.83  301.57
   1  -8  12 2245.08  967.92
   1  -8  13 3249.38  975.47
   1   8  13 3560.19  811.78
   1  -8  13 2828.68  824.33
   1  -8  14 4058.21  637.21
   1   8  14 3820.60  497.91
   1  -8  14 4414.89  750.97
   1  -8  15 4135.63  562.08
   1   8  15 3621.26  500.64
   1  -8  16 4382.18 1977.59
   1   8  16 6385.85  885.88
   1  -8  17  794.89  737.62
   1  -8  18 1772.52  484.10
  -1  -9  18 3479.12 1841.52
  -1  -9  17  431.35  397.73
  -1  -9  16  621.40  724.46
  -1  -9  16  979.82  429.43
  -1  -9  15  271.67  315.47
  -1   9  15  751.91  314.55
  -1  -9  15  747.46  386.02
  -1  -9  14 8939.58  781.44
  -1   9  14 8075.17  703.88
  -1  -9  14 7863.86 1425.74
  -1  -9  13  161.37  424.28
  -1   9  13  124.71  163.49
  -1  -9  13  952.59  434.16
  -1  -9  12 1928.22  832.58
  -1   9  12 2291.69  271.12
  -1  -9  12 2231.35  733.67
  -1   9  12 3192.63  654.61
  -1  -9  11  714.92  581.38
  -1   9  11  309.00  149.80
  -1  -9  11  986.59  380.51
  -1   9  11  325.50  223.45
  -1  -9  1017517.87 1012.16
  -1   9  1018025.35 1008.01
  -1  -9  1018536.80 1123.26
  -1   9  1017950.85 1126.91
  -1  -9   9  322.84  156.24
  -1   9   9  568.77  267.36
   1  -9  -9  836.37  353.62
  -1  -9   9  -91.05  190.29
  -1  -9   8 7341.86  653.64
  -1   9   8 7290.50  635.64
   1  -9  -8 6376.88  449.19
  -1  -9   8 7633.83  802.62
  -1  -9   7 3525.59  913.59
   1  -9  -7 2610.73  759.17
  -1  -9   7 3218.07  847.05
   1  -9  -624461.63 1351.65
  -1   9   621236.73 1177.59
  -1  -9   623457.26 1392.56
   1  -9  -621798.80 1278.83
  -1  -9   623194.76 1390.71
   1  -9  -5  717.41  201.91
  -1   9   5 1332.50  186.40
  -1  -9   5 1528.30  342.18
   1  -9  -5 1172.54  349.64
  -1  -9   5  740.86  487.74
   1  -9  -419332.97  882.89
  -1   9   419085.12  811.03
  -1  -9   418971.51  900.56
   1  -9  -419227.62  978.40
  -1  -9   418764.25 1262.59
   1  -9  -3  718.00  256.95
  -1   9   3  660.65  193.40
  -1  -9   3 1242.36  285.54
   1   9  -3  904.96  152.77
   1  -9  -3 1385.36  479.55
  -1  -9   3  681.19  474.94
   1  -9  -248545.63 1733.88
  -1  -9   248138.20 1662.00
  -1   9   247796.39 1658.81
   1   9  -247692.95 1642.96
   1  -9  -248198.28 2075.37
  -1  -9   248838.91 1888.89
   1  -9  -1  272.78  172.47
  -1  -9   1  509.95   70.60
  -1   9   1  222.04  102.80
   1   9  -1  188.94   86.39
   1  -9  -1  231.80   98.42
  -1  -9   1  324.53  362.25
  -1  -9   015658.94  884.97
   1  -9   016658.21 1012.90
  -1   9   015638.01  911.99
   1   9   015396.24  870.91
  -1  -9   015441.01 1234.64
   1  -9   1 1703.87  274.96
  -1   9  -1 1058.15  213.74
   1  -9   1 1926.30  453.83
  -1  -9  -1 1071.42  480.02
   1  -9   211762.14  733.83
  -1   9  -211768.21  705.82
  -1  -9  -212577.69  856.83
   1  -9   213937.72  951.87
   1  -9   3   15.54  111.64
  -1  -9  -3  293.53  219.63
   1  -9   3  230.74  111.50
   1   9   4 8018.85  504.66
   1  -9   4 8114.26  612.35
   1   9   4 7759.73  484.76
  -1  -9  -4 7976.73  757.72
   1  -9   4 7732.13  857.50
   1   9   5 4914.33  365.64
   1  -9   5 5359.94  804.05
   1   9   5 5201.92  323.43
  -1  -9  -5 4324.10  466.79
   1  -9   5 4863.93 1317.02
   1   9   623796.16 1288.07
   1  -9   627806.13 1593.01
   1   9   624054.00 1285.50
  -1  -9  -624088.78 1684.38
   1  -9   623463.10 1412.64
   1   9   7  397.23  135.08
   1  -9   7  839.73  182.99
   1   9   7  568.61  289.80
  -1  -9  -7  530.07  192.49
   1  -9   7  653.57  322.65
   1  -9   8  297.87  303.60
   1   9   8  453.53  156.31
  -1  -9  -8  636.95  242.18
   1  -9   8  377.97  210.50
   1  -9   9 1668.63  452.78
   1   9   9 1199.68  391.89
  -1  -9  -9 1192.93  359.67
   1  -9   9 1449.08  312.75
   1  -9  10 7126.20  605.94
   1   9  10 7734.81  517.39
  -1  -9 -10 9065.32  730.22
   1  -9  10 9820.35  839.96
   1  -9  11  154.21  245.76
   1   9  11    8.37   73.70
   1  -9  11  381.07  202.42
   1   9  11  157.76  134.51
   1  -9  12 3664.01 1136.19
   1   9  12 3923.80  528.15
   1  -9  12 4772.03  811.52
   1  -9  13 2468.69  587.54
   1   9  13 1017.02  351.57
   1  -9  13 1053.13  398.07
   1  -9  1416817.23 1306.87
   1  -9  1413564.06 1438.42
   1  -9  15   43.36  446.21
   1  -9  16  860.77  515.16
   1  -9  17  533.60  244.48
  -1 -10  17 1320.37 1042.26
  -1 -10  16 1095.54  476.78
  -1 -10  16  341.94  635.97
  -1 -10  15  940.03  566.24
  -1 -10  15  414.39  394.23
  -1 -10  14 1764.73  790.46
  -1 -10  14 2115.77  788.27
  -1 -10  1312740.04 1074.03
  -1 -10  1311047.61  920.06
  -1 -10  12  318.71  288.05
  -1  10  12  615.93  372.17
  -1 -10  12  822.75  444.28
  -1  10  12  541.15  444.66
  -1 -10  11 3544.15  964.71
  -1  10  11 3772.81  337.48
  -1 -10  11 3806.08  730.91
  -1  10  11 2009.30  541.99
  -1 -10  10 2123.13  699.96
  -1  10  10 1396.29  225.33
   1 -10 -10 2395.29  606.57
  -1 -10  10 1158.96  594.24
  -1 -10   913121.05  848.23
  -1  10   911085.49  706.39
   1 -10  -912212.87  808.80
  -1 -10   911411.23  759.65
  -1 -10   8  211.03  173.48
  -1  10   8  227.30  133.91
   1 -10  -8  454.13  206.62
  -1 -10   8  756.46  500.01
  -1 -10   7   91.30  201.14
  -1  10   7  154.75   98.53
   1 -10  -7  200.58  174.78
  -1 -10   7  372.03  267.97
   1 -10  -6  444.87  225.34
  -1  10   6  268.17  104.03
  -1 -10   6  578.94  385.18
   1 -10  -6  211.33  208.07
  -1 -10   6  481.48  209.18
   1 -10  -545843.95 2459.22
  -1  10   543882.57 2319.79
  -1 -10   547014.13  810.20
   1 -10  -543050.64 2394.40
  -1 -10   549605.11 1152.56
   1 -10  -4 1291.90  343.80
  -1  10   4 1615.82  282.78
  -1 -10   4 2023.84  409.27
   1 -10  -4 1971.77  960.72
  -1 -10   4 1193.20  303.15
   1 -10  -3   97.17  104.75
  -1 -10   3  425.80  187.40
  -1  10   3  322.02  143.86
   1  10  -3  179.72  153.51
   1 -10  -3  753.51  414.18
  -1 -10   3  232.95  197.54
   1 -10  -2  626.19  203.31
  -1 -10   2  307.25  109.93
  -1  10   2  303.92  185.99
   1  10  -2  310.10  133.99
   1 -10  -2  657.07  342.27
   1 -10  -123264.42 1023.59
  -1 -10   123727.75  973.37
  -1  10   122694.89  959.57
   1  10  -123267.01  937.75
   1 -10  -126752.27 1363.15
  -1 -10   123211.59 1207.51
  -1 -10   0 3979.75  254.66
   1 -10   0 3641.00  280.95
  -1  10   0 3143.90  285.93
  -1 -10   0 4578.26  764.80
   1 -10   1  608.41  341.34
  -1  10  -1  260.83  136.22
   1 -10   1  905.93  679.77
  -1 -10  -1  927.64  376.56
   1 -10   2  641.03  197.39
  -1 -10  -2  952.14  298.71
   1 -10   2  849.83  352.81
   1 -10   319441.21 1112.51
  -1 -10  -317790.75 1166.18
   1 -10   316080.58  740.70
   1 -10   4 4669.54  627.77
  -1 -10  -4 5273.90  481.73
   1 -10   4 4973.02  526.99
   1  10   5 9153.96  683.30
   1 -10   5 9013.34  838.50
   1  10   5 9147.23  681.30
  -1 -10  -5 8934.21  776.77
   1 -10   5 9474.29 1214.74
   1 -10   6 1314.26  445.02
   1  10   6 1072.83  223.84
  -1 -10  -6 1529.27  359.75
   1 -10   6 2276.14  530.79
   1 -10   717353.00 1062.86
   1  10   714852.31  841.42
  -1 -10  -715310.68 1000.52
   1 -10   715050.45  988.87
   1 -10   8 1984.47  536.49
   1  10   8 1786.14  304.59
  -1 -10  -8 2605.69  359.57
   1 -10   8 2206.12  547.35
   1 -10   9 1964.74 1011.98
   1  10   9 1684.71  295.12
  -1 -10  -9 1921.19  612.61
   1 -10   9 1768.85  704.72
   1 -10  10  627.81  586.31
  -1 -10 -10  825.71  337.45
   1 -10  10 1380.31  414.27
   1 -10  11 8065.11  800.70
   1 -10  11 8153.51 1410.37
   1 -10  12   72.66  239.84
   1 -10  12  207.36  174.97
   1 -10  13   54.06  494.91
   1 -10  13  443.73  424.56
   1 -10  14   19.49  200.99
   1 -10  14   87.16  178.17
   1 -10  15 4870.47  611.10
   1 -10  16  630.14  296.44
   1 -10  17 1786.48  693.44
  -1 -11  17  294.97  365.35
  -1 -11  16  431.57  229.19
  -1 -11  16  336.36  264.64
  -1 -11  15 1973.09  691.98
  -1 -11  15  674.60  347.65
  -1 -11  14 1306.33  668.64
  -1 -11  14  590.47  180.33
  -1 -11  13  209.73  224.54
  -1 -11  13  100.68  209.53
  -1 -11  12 1979.42  762.83
  -1 -11  12 2803.17  697.32
  -1 -11  1115013.45  772.29
  -1 -11  1114854.65  974.63
  -1  11  1115362.30  737.80
  -1 -11  10 3137.11 1143.72
   1 -11 -10 3879.24  538.48
  -1 -11  10 5252.88  497.23
  -1 -11   9  109.03  212.61
  -1  11   9   64.01   77.76
   1 -11  -9  421.88  194.35
  -1 -11   9   43.11  231.21
  -1 -11   8  354.75  240.94
  -1  11   8  156.75  138.26
   1 -11  -8   95.09  236.00
  -1 -11   8  527.30  258.45
  -1 -11   717828.10 1033.70
  -1  11   718661.99  993.29
   1 -11  -719854.93 1112.11
  -1 -11   716386.68 1143.82
  -1 -11   6  215.98  152.05
   1 -11  -6   16.35  116.92
  -1 -11   6  378.01  356.07
   1 -11  -5 6546.91  449.60
  -1 -11   5 6366.76  468.57
   1 -11  -5 6107.68 1024.85
  -1 -11   5 6405.24 1074.79
  -1 -11   4 3803.81  342.32
   1 -11  -4 4403.72  412.73
  -1 -11   4 3744.59 1029.07
   1 -11  -310121.64  817.99
  -1 -11   3 9560.72  794.64
   1 -11  -3 9630.68 1404.80
  -1 -11   3 9559.11  858.82
   1 -11  -210144.07  824.40
  -1 -11   2 9391.25  728.35
  -1  11   2 8883.32  683.49
   1 -11  -210429.76  915.12
   1 -11  -1 1434.23  354.77
  -1 -11   1 1340.71  217.47
  -1  11   1 1035.71  149.72
   1 -11  -1 1538.36  697.58
  -1 -11   1 1786.48  335.91
  -1 -11   0  383.33   47.93
   1 -11   0  427.11  219.46
  -1  11   0  225.33   95.25
   1 -11   0  435.60  537.93
  -1 -11   0  626.61  275.76
   1 -11   1 7485.65  629.49
   1 -11   1 7834.77  739.47
  -1 -11  -1 7576.64  835.09
   1 -11   214257.42  813.62
  -1 -11  -212116.15  608.16
   1 -11   214646.43 1116.05
   1 -11   3 2807.47  224.27
  -1 -11  -3 2093.74  827.72
   1 -11   3 2479.20  636.73
   1 -11   4 3372.34  515.54
  -1 -11  -4 1973.83  647.01
   1 -11   4 2933.49  532.74
   1 -11   522637.34 1305.04
  -1 -11  -519894.04 1196.57
   1 -11   519761.88 1313.02
   1 -11   6 3350.90  734.74
  -1 -11  -6 3271.92  308.38
   1 -11   6 3813.03  577.90
   1 -11   7  178.28  153.46
  -1 -11  -7  701.64  301.71
   1 -11   7  504.05  370.24
   1 -11   8  944.70  441.23
  -1 -11  -8  346.70  313.21
   1 -11   8  409.37  424.21
   1 -11   9 9227.09  728.86
  -1 -11  -9 8919.49  514.89
   1 -11   9 9009.81  874.28
   1 -11  10 1434.06  601.46
  -1 -11 -10 1566.60  557.35
   1 -11  10 1058.09  477.55
   1 -11  11 1002.23  657.18
   1 -11  11  529.92  302.54
   1 -11  12  -26.87  197.96
   1 -11  12  243.95  261.21
   1 -11  13 7647.14  797.80
   1 -11  13 9184.61  918.55
   1 -11  14  996.54  496.24
   1 -11  14  919.46  626.18
   1 -11  15  421.96  215.27
   1 -11  15  130.59  131.01
   1 -11  16  163.63  199.17
  -1 -12  16  262.66  244.96
  -1 -12  16  186.86  297.33
  -1 -12  15  574.45  339.93
  -1 -12  15  440.86  258.03
  -1 -12  14 1744.98 1002.35
  -1 -12  14 2293.11  364.23
  -1 -12  13  203.58  204.37
  -1 -12  13  701.36  352.24
  -1 -12  12 4991.28 1199.57
  -1 -12  12 5576.44 1161.80
  -1 -12  11 4698.26  557.47
  -1 -12  11 3688.83 1188.57
  -1 -12  10 1252.50  758.90
   1 -12 -10 2739.95  634.02
  -1 -12  10 1536.25  572.61
  -1 -12   9  323.56  299.04
   1 -12  -9  225.55  168.75
  -1 -12   9  680.98  229.66
  -1 -12   8 5776.49  871.88
   1 -12  -8 5933.81  612.65
  -1 -12   8 4267.98 1355.30
  -1 -12   7  555.39  392.75
   1 -12  -7  276.17  183.12
  -1 -12   7  596.54  233.02
  -1 -12   6 2980.12  439.26
   1 -12  -6 3828.77 1203.69
  -1 -12   6 4640.99 1045.92
   1 -12  -5 2726.52  187.94
  -1 -12   5 2582.10  641.23
   1 -12  -5 3145.53 1167.85
  -1 -12   5 4646.71  734.39
   1 -12  -414153.36  740.14
  -1 -12   414527.42  790.71
   1 -12  -415501.01 1058.10
  -1 -12   414935.39 1059.80
   1 -12  -3  188.83   86.79
  -1 -12   3  254.22  147.89
   1 -12  -3  476.45  578.75
  -1 -12   3  317.83  128.73
   1 -12  -2 6699.66  504.72
  -1 -12   2 6282.52  459.13
   1 -12  -2 7648.99 1126.01
  -1 -12   2 5760.29  616.00
   1 -12  -1  683.81  164.05
  -1 -12   1  376.83  141.00
   1 -12  -1  443.48  581.18
  -1 -12   1 1102.15  645.71
   1 -12   0 2628.88  409.86
   1 -12   0 3144.26  736.89
  -1 -12   0 3062.57 1119.87
   1 -12   1  194.16  107.28
  -1 -12  -1   24.37  223.50
   1 -12   1  355.33  171.38
   1 -12   2  712.52  262.15
   1 -12   2  260.81  219.76
  -1 -12  -2  458.47  431.32
   1 -12   3  168.88  154.12
  -1 -12  -3  229.81  424.52
   1 -12   3  252.59  172.62
   1 -12   413195.57  742.91
  -1 -12  -411728.58  780.68
   1 -12   411421.24  786.56
   1 -12   5  194.48  118.84
  -1 -12  -5  285.34  213.54
   1 -12   5  624.04  250.39
   1 -12   6 5074.36  532.65
  -1 -12  -6 3821.10  917.45
   1 -12   6 4275.75  997.65
   1 -12   7  238.03  318.12
  -1 -12  -7  257.89  164.03
   1 -12   820001.56 1237.95
  -1 -12  -818141.83 1203.65
   1 -12   818906.99 1262.10
   1 -12   9  763.69  321.99
  -1 -12  -9  941.43  326.62
   1 -12   9  739.86  415.39
   1 -12  10 2052.47  830.02
  -1 -12 -10 1645.91  658.01
   1 -12  10 1460.26  852.78
   1 -12  11   56.58  166.11
   1 -12  11  207.62  252.31
   1 -12  1215662.36 1452.56
   1 -12  1211690.74 1320.23
   1 -12  13  309.00  170.00
   1 -12  13  292.61  396.89
   1 -12  14  221.14  273.59
   1 -12  14  916.12  328.06
   1 -12  15  172.64  348.86
   1 -12  16  465.08  564.44
  -1 -13  16  633.20  276.02
  -1 -13  15 1982.45  915.11
  -1 -13  15  323.24  931.11
  -1 -13  14 3724.21 1424.60
  -1 -13  14 2742.16 1405.95
  -1 -13  13 1080.09  385.42
  -1 -13  13  843.10  487.67
  -1 -13  12  485.36  337.69
  -1 -13  12 1216.82  575.44
  -1 -13  11 5605.66  574.97
   1 -13 -11 7193.19  702.52
  -1 -13  11 7567.04  847.25
  -1 -13  10 1338.09  490.03
   1 -13 -10 1615.12  524.37
  -1 -13  10 1752.15  713.51
  -1 -13   9 1781.78  513.16
   1 -13  -9 1957.16  683.66
  -1 -13   9 1290.23 1236.50
  -1 -13   8 4911.14  357.76
   1 -13  -8 4733.38 1208.28
  -1 -13   8 6117.18 1752.40
  -1 -13   7 9305.20  546.19
   1 -13  -7 8465.58  677.53
  -1 -13   7 9800.22  807.41
  -1 -13   611799.06  836.05
   1 -13  -611626.60 1390.25
  -1 -13   611793.61 1499.17
  -1 -13   5 4093.45  278.49
   1 -13  -5 1248.03 1676.67
  -1 -13   5 3159.77  948.35
  -1 -13   4 3324.52  245.02
   1 -13  -4 3381.13  538.01
  -1 -13   4 2545.63  860.78
   1 -13  -3 1656.89  239.78
  -1 -13   3 2294.92 1192.65
   1 -13  -2 4240.62 1374.22
  -1 -13   2 3681.18 1720.48
   1 -13  -1  520.05  295.02
  -1 -13   1  479.45  242.87
   1 -13   0 5803.86 1194.71
  -1 -13   0 7834.32  831.02
   1 -13   1 9841.48  666.23
  -1 -13  -1 9523.02 1592.01
   1 -13   215056.89  850.96
   1 -13   214428.88 1065.52
  -1 -13  -214896.05 1080.48
   1 -13   3  438.97  145.99
  -1 -13  -3  716.73  449.21
   1 -13   3  356.87  447.47
   1 -13   4 3097.89  220.84
  -1 -13  -4 2481.38 1182.84
   1 -13   4 2271.09  826.97
   1 -13   5 8148.75  452.37
  -1 -13  -5 6240.18 1702.02
   1 -13   5 7509.18 1909.27
   1 -13   6 5357.23  446.10
  -1 -13  -6 5241.71 1218.23
   1 -13   6 4966.45  763.80
   1 -13   7  369.23  273.45
  -1 -13  -7  723.56  458.03
   1 -13   7  287.82  212.81
   1 -13   8 2763.19  873.12
  -1 -13  -8 3616.84  905.57
   1 -13   8 3969.04 1019.53
   1 -13   9 2279.37  728.42
  -1 -13  -9 2264.78  791.19
   1 -13   9 2100.62  637.20
   1 -13  10 5454.48  953.27
  -1 -13 -10 5089.13 1250.84
   1 -13  10 3587.16 1018.50
   1 -13  11  321.50  158.70
   1 -13  11  164.61  199.15
   1 -13  12 2398.42  373.68
   1 -13  12  530.65  509.81
   1 -13  13 2233.29 1338.07
   1 -13  13 2014.37 1136.32
   1 -13  14 2183.74  541.44
   1 -13  14 2841.92 1064.80
   1 -13  15   50.55  306.53
  -1 -14  15 1814.34  416.28
  -1 -14  14  307.68  229.43
  -1 -14  13 8421.45  723.55
  -1 -14  12 1595.83  328.24
   1 -14 -11  224.72  207.93
  -1 -14  11  284.45  243.89
  -1 -14  10  159.34  191.27
   1 -14 -10  414.37  182.92
  -1 -14  10  160.00  449.52
   1 -14  -912749.83 1790.89
  -1 -14   915446.84 1618.47
   1 -14  -8  264.36  209.81
  -1 -14   8  439.13  303.66
   1 -14  -7 3844.53  837.75
  -1 -14   7 4339.16 1067.33
   1 -14  -6   32.60   70.81
  -1 -14   6 1083.79  568.39
   1 -14  -513704.55 1375.34
  -1 -14   514195.30 1383.70
   1 -14  -4  381.17  305.10
  -1 -14   4  377.14  343.07
   1 -14  -3 1488.05  550.90
   1 -14  -2  163.53  603.35
  -1 -14   2  446.57  273.83
   1 -14  -121287.13 1420.00
  -1 -14   121191.62 1432.83
   1 -14   0  231.29  398.90
  -1 -14   0  304.17  488.17
  -1 -14  -1 4593.59 1547.38
  -1 -14  -2  279.71  291.92
  -1 -14  -312144.96 1166.28
   1 -14   311398.33 1233.66
   1 -14   4    4.59   54.20
  -1 -14  -4  165.52  170.67
   1 -14   4  458.33  495.94
   1 -14   5  160.07  318.32
  -1 -14  -5   56.94  291.49
   1 -14   5  737.47  302.16
   1 -14   6  441.59  218.76
  -1 -14  -6  689.42  353.26
   1 -14   6  104.62  505.37
   1 -14   7 7486.27  684.24
  -1 -14  -7 6870.54  513.20
   1 -14   7 6235.38  673.06
   1 -14   8  274.51  282.71
  -1 -14  -8  392.45  279.97
   1 -14   8  557.33  479.19
   1 -14   9  851.81  638.98
  -1 -14  -9  971.83  353.35
   1 -14   9  596.94  481.19
   1 -14  11  975.83  444.97
   1 -14  11  453.11  682.49
   1 -14  12  913.48  330.17
   1 -14  12  374.35  619.86
   1 -14  13 1713.47  751.12
   1 -14  13  993.67  747.20
   1 -14  14  260.61  223.25
   1 -14  14  410.93  318.22
  -1 -15  13  157.61  225.66
  -1 -15  12  827.60  461.74
  -1 -15  11 2152.38 1150.14
   1 -15 -10  631.08  455.88
  -1 -15  10 2722.37 1182.29
   1 -15  -9  660.97  298.90
  -1 -15   9  673.01  475.54
   1 -15  -8 2102.67  631.47
  -1 -15   8 1508.11  912.18
   1 -15  -7 1323.21  509.40
  -1 -15   7 1366.42  458.49
   1 -15  -6 2635.52  778.71
  -1 -15   6 2191.22  782.45
   1 -15  -5 1596.39  483.12
  -1 -15   5  175.27  277.66
   1 -15  -4 3235.69  837.38
  -1 -15   4 2145.43  820.41
   1 -15  -3 2489.12  596.41
   1 -15  -2 6175.90  864.61
  -1 -15   2 7801.44  796.29
   1 -15  -1  962.54  665.63
  -1 -15   1 -104.67  333.32
   1 -15   0 8258.92  681.48
  -1 -15   010484.34 1510.20
  -1 -15  -1 4280.02  875.03
   1 -15   1 5621.52 1633.25
   1 -15   218056.03  967.31
  -1 -15  -220252.50  849.54
  -1 -15  -3 1312.00  550.94
   1 -15   3  236.76  224.64
  -1 -15  -4  639.10  292.96
   1 -15   4  216.89  571.19
  -1 -15  -5 3660.40 1060.03
   1 -15   5 3477.14 1384.29
  -1 -15  -6 4251.47  403.00
   1 -15   6 4257.36 1517.82
  -1 -15  -7   11.26  271.63
   1 -15   7 1264.11  464.22
  -1 -15  -8 2810.70  694.79
   1 -15   8 2413.62  770.10
  -1 -15  -9 1470.06  614.64
   1 -15   9 1694.65  888.58
   1 -15  10 5678.33 1131.99
   1 -15  11   40.14  218.22
   1 -15  12  424.27  352.73
   1 -15  13 2154.26  721.75
  -1 -16  11  102.86  228.07
   1 -16 -10  707.99  448.00
  -1 -16  10  138.32  311.88
   1 -16  -9 1130.92  652.12
  -1 -16   9 1323.24  687.78
   1 -16  -8 2549.94  830.74
  -1 -16   8 1472.78 1229.77
   1 -16  -7  512.08  447.89
  -1 -16   7  569.85  466.45
   1 -16  -6 2116.61  789.05
  -1 -16   6 1796.69  812.17
   1 -16  -5  180.10  211.98
  -1 -16   5 1286.85  595.88
   1 -16  -4 5667.59  683.22
  -1 -16   4 3797.61 1610.14
   1 -16  -3  243.25  190.25
   1 -16  -2 3011.77  886.47
  -1 -16   2 2046.24  707.97
   1 -16  -1 3412.56  828.29
  -1 -16   1 2629.79  885.30
   1 -16   0 6720.82 1792.14
  -1 -16   0 6349.09 1360.42
  -1 -16  -1  413.56  290.33
   1 -16   1  683.47  322.45
  -1 -16  -2 2617.68  667.98
  -1 -16  -3 1790.66  689.99
   1 -16   3 1265.96  330.19
  -1 -16  -4 7696.68 1885.38
   1 -16   4 9461.73 1709.92
  -1 -16  -5  491.53  364.78
   1 -16   5  296.46  305.98
  -1 -16  -6  513.70  592.05
   1 -16   6 1944.31  436.47
  -1 -16  -7 1103.85  481.35
   1 -16   7  724.87  594.24
  -1 -16  -8 3155.76  650.49
   1 -16   8 3983.29  949.58
   1 -16   9 1219.54  693.06
   1 -16  10 2308.66 1020.33
   1 -16  11  588.09  304.20
   1 -17  -9  856.69  232.14
   1 -17  -8  -29.65  181.44
  -1 -17   8  167.66  245.52
   1 -17  -7 6876.47 1740.62
  -1 -17   7 6527.23  529.16
   1 -17  -6  736.96  409.66
   1 -17  -5  222.87  171.59
  -1 -17   5  576.87  295.65
   1 -17  -4  451.43  346.95
  -1 -17   4  590.87  383.72
   1 -17  -3 7257.53  652.59
  -1 -17   3 9223.43 2337.22
   1 -17  -2 2123.78  782.24
  -1 -17   2 2499.43  662.19
   1 -17  -1  561.77  393.12
  -1 -17   1  656.43  234.67
   1 -17   0  247.72  522.34
  -1 -17   0  600.44  348.19
   1 -17   1 3101.86  778.23
  -1 -17  -1 2749.71 1006.71
  -1 -17  -2 1397.20  434.96
  -1 -17  -3 2257.04  564.12
   1 -17   3 1482.50  810.56
  -1 -17  -4  404.93  273.63
   1 -17   4  316.07  521.87
  -1 -17  -5 5877.97  909.55
   1 -17   5 7085.28  912.53
  -1 -17  -6 1266.06  400.76
   1 -17   6  899.04  546.12
  -1 -17  -7  875.20  325.22
   1 -17   7 1358.30  491.83
  -1 -17  -8  558.31  268.44
   1 -17   8  886.46  423.18
   1 -18  -8  572.02  460.61
   1 -18  -7  104.78  217.49
   1 -18  -6  184.10  279.39
   1 -18  -5 3497.98  717.78
  -1 -18   5 3418.29 1500.71
   1 -18  -4 2642.15  869.88
   1 -18  -3 1470.98  378.91
  -1 -18   3 1158.88  717.04
   1 -18  -2 1743.31  568.33
  -1 -18   2 1919.91  554.29
   1 -18  -1 6691.97 1363.59
  -1 -18   1 8609.66 1116.07
   1 -18   0 1103.77  425.57
  -1 -18   0  756.33  705.97
   1 -18   1 1643.05  596.57
  -1 -18  -1 1713.56  781.59
  -1 -18  -2  160.08  339.71
  -1 -18  -3 5671.13 1433.28
   1 -18   3 8717.34  971.22
  -1 -18  -4 4705.81 1311.93
   1 -18   4 3926.82 1121.32
  -1 -18  -5  490.91  371.53
   1 -18   5  216.99  177.04
  -1 -18  -6  265.92  238.31
  -1 -18  -7 3285.10 1166.69
  -1 -19  -1  628.15  327.28
  -1 -19  -2 5128.25 1442.83
  -1 -19  -3  -99.16  234.76
  -1 -19  -4   77.25  178.74
  -2   0  20 1265.82  292.25
  -2   0  19  244.60  325.41
  -2   0  1811072.14 1945.84
  -2   0  17  575.13  462.96
  -2   0  1612365.80 1257.55
  -2   0  15  243.16  207.14
  -2   0  15  229.93  172.25
  -2   0  1424369.92 1391.68
  -2   0  1422597.43 1330.95
  -2   0  13  642.68  302.14
  -2   0  13  252.80  166.90
  -2   0  12 9622.97  695.85
  -2   0  12 8892.15  676.59
  -2   0  11  -18.84  425.52
  -2   0  11  369.71  192.13
  -2   0  1041582.10 1608.43
  -2   0  1044111.75 1636.86
  -2   0   9  100.24  318.93
  -2   0   9  -21.08  137.33
  -2   0   8  155.67  276.25
  -2   0   8  555.60  127.57
   2   0  -8  684.97  209.27
  -2   0   7  222.39  154.42
  -2   0   7   80.02  142.39
   2   0  -7  118.80   70.48
   2   0  -661740.32 1954.13
  -2   0   659259.35 1841.84
   2   0  -657389.72 1773.61
   2   0  -5  -25.45  132.23
  -2   0   5   29.00  191.39
  -2   0   5   46.37   93.05
   2   0  -5  -39.32  115.29
   2   0  -4 1357.40  334.57
  -2   0   4  878.62  331.69
  -2   0   4 1577.50  417.58
   2   0  -4 1273.43  294.12
   2   0  -3  424.53  268.36
  -2   0   3  -49.33  163.66
  -2   0   3  206.68  146.62
   2   0  -3  294.29  145.06
   2   0  -216017.53  842.85
  -2   0   216700.60  456.85
  -2   0   216167.27  838.42
   2   0  -216035.03  832.63
  -2   0   1   33.42  115.59
  -2   0   1   27.43   50.47
   2   0  -1  150.26  116.40
   2   0   016320.14  415.18
  -2   0   015100.08  780.10
  -2   0   016868.80  421.41
   2   0   017199.55  426.13
   2   0   1   62.98   89.05
  -2   0  -1  183.54  139.06
  -2   0  -1  104.11   81.60
   2   0   1   83.56   52.93
   2   0   2114465.9 2548.27
  -2   0  -2116308.0 2572.13
   2   0   3   67.37  131.73
  -2   0  -3    3.96  157.81
   2   0   3   61.05   35.17
  -2   0  -3   87.06   54.46
   2   0   4 4039.34  368.81
  -2   0  -4 3503.69  295.68
   2   0   4 3563.65  229.33
  -2   0  -4 3965.60  219.48
   2   0   5  332.50  188.45
  -2   0  -5  176.59   52.45
   2   0   5   -7.95   29.95
  -2   0  -5    2.04   22.73
   2   0   623190.09 1149.31
   2   0   620945.43 1080.88
  -2   0  -622221.88  233.38
   2   0   7  437.54  206.04
   2   0   7    8.83   49.37
  -2   0  -7   -1.97   21.74
   2   0   8 3953.20  747.90
   2   0   8 2911.11  206.54
  -2   0  -8 2240.45  105.86
   2   0   9  232.40  189.35
   2   0   9   14.85   54.76
  -2   0  -9   87.19   45.77
   2   0  10 7623.27  672.43
   2   0  10 6117.11  400.92
  -2   0 -10 5730.73  343.14
   2   0  11 -118.63  204.87
   2   0  11  128.44   76.31
  -2   0 -11    6.89   31.82
   2   0  12 2940.88  652.25
   2   0  12 2977.85  215.91
   2   0  13   28.48  208.99
   2   0  1413074.63 1000.62
   2   0  15  107.10  123.59
   2   0  16 4214.49  411.50
   2   0  17   53.87  205.71
   2   0  18 5123.11  621.20
   2   0  19  -22.95  255.77
  -2   1  20 1396.82  705.77
  -2  -1  20 1005.57  763.83
  -2  -1  19 3587.48 1215.77
  -2   1  19 4843.42  948.62
  -2  -1  18 1613.37  555.56
  -2   1  18  293.30  733.34
  -2   1  17  324.85  189.26
  -2  -1  17  405.93  175.19
  -2  -1  16 5062.06  648.06
  -2   1  16 4566.09  747.69
  -2  -1  1512443.00 1718.93
  -2   1  1513776.16 1298.11
  -2  -1  1512718.77  810.80
  -2   1  1512672.31  794.09
  -2  -1  14  328.93  315.65
  -2   1  14  224.07  114.44
  -2  -1  14   42.42  159.60
  -2   1  14    9.47   78.68
  -2  -1  13  307.93  221.59
  -2   1  13   87.83  183.37
  -2  -1  13  228.74  198.52
  -2   1  13  139.00  131.51
  -2  -1  12 2626.39  846.95
  -2   1  12 2454.99  452.53
  -2  -1  12 2240.52  475.44
  -2   1  12 2361.92  289.12
  -2  -1  1115421.25  590.92
  -2   1  1114709.39 1056.30
  -2  -1  1115378.66  511.95
  -2   1  1117010.76  820.04
  -2  -1  10  509.45  209.21
  -2   1  10  703.07  348.27
  -2  -1  10  457.85  437.50
  -2   1  10  481.83  422.64
  -2  -1   9 2011.27  304.46
  -2   1   9 3456.21  980.93
  -2  -1   9 2103.85  597.23
  -2   1   9 2531.89  349.95
  -2   1   8 1998.28  520.11
  -2  -1   8 1918.40  446.33
  -2   1   8 2343.86  623.38
   2   1  -8 1794.32  505.73
   2  -1  -8 1529.11  144.09
   2  -1  -733907.54 1212.23
  -2  -1   736363.27 1254.00
  -2  -1   735504.84 1217.11
  -2   1   736896.32 1339.14
   2   1  -736271.09 1293.50
   2  -1  -737098.73 1202.85
   2  -1  -616662.00 1167.48
  -2  -1   614286.10  842.05
  -2  -1   614931.46  861.52
  -2   1   615009.12  851.31
   2   1  -613156.46  731.00
   2  -1  -613843.25  759.22
   2   1  -5 3912.45  498.88
   2  -1  -5 3326.84  488.48
  -2  -1   5 2877.53  348.00
  -2   1   5 2471.52  288.65
  -2  -1   5 3030.54  684.00
   2   1  -5 2480.31  252.61
  -2   1   5 3197.90  345.14
   2  -1  -5 2839.61  574.70
   2   1  -4 4521.61  468.91
   2  -1  -4 4268.66  306.61
  -2  -1   4 5292.76  366.62
  -2   1   4 4644.24  373.58
  -2  -1   4 4802.22  391.48
   2   1  -4 4646.09  317.23
  -2   1   4 5303.44  621.79
   2  -1  -4 4514.33  322.51
   2   1  -343101.90 1041.71
   2  -1  -347953.63 1288.49
  -2  -1   345582.16 1085.62
  -2   1   346125.76 1135.63
  -2  -1   346289.92 1118.48
   2   1  -344287.78 1053.40
  -2   1   343569.32 1036.31
   2  -1  -345203.46 1067.62
   2   1  -212683.93  680.49
  -2  -1   212113.89  655.94
   2  -1  -212921.86  709.31
  -2   1   213351.23  720.85
  -2  -1   212956.33  696.36
   2   1  -210471.37  576.77
  -2   1   212786.98  679.45
   2  -1  -210924.85  603.96
   2   1  -1    5.18   93.03
  -2  -1   1   44.87  109.34
   2  -1  -1  114.10   75.37
  -2   1   1  148.96  118.93
  -2   1   1  -33.31  144.89
  -2  -1   1  130.40  149.43
   2   1  -1  137.17  108.71
  -2   1   1   16.76   78.94
  -2  -1   074653.86 1666.52
  -2   1   077575.06 1741.42
   2  -1   080326.37 1812.12
  -2   1   078105.67 1751.59
  -2   1  -1111820.1 2474.93
  -2   1  -1120499.4 2646.19
   2  -1   211815.30  678.08
   2   1   210784.56  578.40
  -2   1  -2 9318.86  859.85
  -2  -1  -210563.26  565.70
   2  -1   210982.60  583.77
  -2   1  -211635.20  616.70
  -2  -1  -210768.84  561.79
   2   1   211284.79  573.98
   2  -1   386871.68 1993.27
   2   1   380602.23 1873.01
  -2   1  -380435.85 1849.34
   2  -1   384162.41 1873.67
   2  -1   4   78.67  146.67
   2   1   4   50.70   99.43
  -2   1  -4  495.62  238.08
  -2  -1  -4   34.11  111.11
   2  -1   4  139.47  112.67
   2  -1   5 1870.71  365.69
   2   1   5 1505.77  274.93
  -2   1  -5 1728.43  164.85
  -2  -1  -5 1967.98  193.77
   2  -1   5 1899.08  288.31
   2  -1   6 6509.63  554.02
   2   1   6 7274.73  930.41
   2  -1   6 7103.67  557.62
   2  -1   7  548.49  338.64
   2   1   7 1127.32  297.54
   2  -1   7  508.36  132.77
  -2   1  -7  486.44   99.73
   2  -1   815124.89  909.62
   2   1   814056.65  867.37
   2   1   815795.04  806.41
   2  -1   813259.65  744.82
  -2   1  -813309.74  706.70
   2  -1   913422.30  923.12
   2   1   914160.27  923.77
   2   1   913302.80  755.38
   2  -1   912331.61  741.72
  -2   1  -913848.68  804.46
   2  -1  10 4398.32  715.75
   2   1  10 6033.22  955.55
   2   1  10 3842.88  240.38
   2  -1  10 3394.34  324.08
  -2   1 -10 3485.52  278.37
   2  -1  11 2074.31 1053.41
   2   1  11 2157.27  537.76
   2   1  11 1754.49   74.02
   2  -1  11 2121.75  198.44
   2  -1  12 5156.79  501.36
   2   1  12 7713.72 1482.08
   2  -1  12 3870.22  231.73
   2  -1  1318051.69 1118.74
   2   1  1318979.98 1915.01
   2  -1  14 4189.34 1249.64
   2   1  14 3360.66  941.55
   2   1  15  853.79  310.04
   2  -1  15 1319.57  252.54
   2  -1  16 3014.98  383.50
   2   1  16 1807.60  329.11
   2  -1  17 7525.35 1021.12
   2   1  17 6810.50 1773.86
   2  -1  18   70.41  233.40
   2   1  18  527.82  372.39
   2  -1  19  190.68  167.71
   2   1  19  109.34  248.67
  -2   2  20  358.29  353.36
  -2  -2  20  861.93  414.06
  -2  -2  19  852.32  430.35
  -2   2  19  600.95  221.05
  -2  -2  18  847.79  296.58
  -2   2  18 2111.61  470.18
  -2  -2  17 7811.51 1246.72
  -2   2  17 7220.36  892.78
  -2  -2  16  132.24  381.43
  -2   2  16  229.52  148.02
  -2  -2  16   98.31  100.45
  -2  -2  15 5942.99 1510.34
  -2   2  15 5378.48  587.02
  -2  -2  15 5660.87  299.44
  -2   2  15 5216.46  698.34
  -2  -2  14 1276.63  610.09
  -2   2  14 1528.27  522.22
  -2  -2  14  875.43  248.46
  -2   2  14  461.74  179.56
  -2  -2  13 6849.83  670.14
  -2   2  13 5689.56  622.04
  -2  -2  13 7298.84  586.23
  -2   2  13 6235.33  469.82
  -2  -2  12 2028.66  907.40
  -2   2  12 2684.66  990.29
  -2  -2  12 1712.46  333.74
  -2   2  12 2682.55  359.40
  -2  -2  11 5905.33  712.61
  -2   2  11 4894.36  588.90
  -2  -2  11 5353.88  695.92
  -2   2  11 4990.55  582.46
  -2  -2  10  864.76  202.60
  -2   2  10 2599.79  866.39
  -2  -2  10 1812.33  586.30
  -2   2  10 1930.54  500.44
  -2   2   945106.56 1715.56
  -2  -2   949394.44 1867.37
  -2   2   949959.90 1824.07
  -2   2   8  327.54  264.53
  -2  -2   8  131.14  152.15
  -2   2   8  176.74  130.58
   2  -2  -710293.63  649.45
  -2  -2   7 9287.73  660.76
  -2  -2   7 9101.92  583.61
   2   2  -7 8155.76  654.63
  -2   2   7 9454.03  615.35
   2  -2  -636257.42 1346.47
  -2  -2   639362.58 1294.04
  -2  -2   638873.02 1286.09
   2   2  -635215.11 1152.26
  -2   2   636418.99 1177.31
  -2  -2   549886.27 1224.75
   2  -2  -552341.08 1437.90
  -2   2   547180.76 1162.34
  -2  -2   549645.81 1247.48
  -2   2   551348.96 1240.92
  -2  -2   551049.95 1279.35
   2   2  -549952.43 1266.10
  -2   2   552628.06 1280.58
   2   2  -4 2181.20  368.35
  -2  -2   4 1974.73  279.11
   2  -2  -4 1899.45  191.86
  -2   2   4 1628.82  459.95
  -2   2   4 2297.01  539.77
  -2  -2   4 2151.98  608.76
   2   2  -4 2168.43  565.06
  -2   2   4 2236.29  383.08
   2   2  -3 2256.35  254.84
  -2  -2   3 1630.35  419.95
   2  -2  -3 1882.11  235.85
  -2   2   3 1374.90  196.93
  -2   2   3 1884.90  611.69
  -2  -2   3 2532.22  709.98
   2   2  -3 1897.97  587.57
  -2   2   3 1786.67  184.80
   2   2  -2 7771.15  447.51
  -2  -2   2 8459.44  463.12
   2  -2  -2 8776.39  540.34
  -2   2   2 8816.86  517.40
   2  -2  -2 8907.45  516.49
  -2   2   2 8324.07  511.87
  -2  -2   2 9067.47  543.87
   2   2  -2 9422.12  824.42
   2  -2  -188133.79 1988.51
   2  -2  -192030.40 2072.71
  -2   2   194255.13 2126.64
  -2  -2   195087.51 2149.46
   2   2  -188805.12 2009.10
   2   2   041024.78  930.57
   2  -2   044432.33 1068.84
  -2   2   043666.83 1022.87
   2  -2   041884.82 1149.77
  -2   2   039503.92  971.33
  -2  -2   042843.85 1023.21
   2   2   044683.25 1071.45
   2  -2   1105645.3 2371.63
  -2   2  -1115361.0 2568.48
   2  -2   1108738.7 2432.30
  -2   2  -1107412.6 2405.00
  -2  -2  -1109135.9 2410.19
   2   2   1107934.3 2374.85
   2  -2   2 5342.64  350.24
   2   2   2 6895.18  390.27
  -2   2  -2 6098.28  383.76
  -2  -2  -2 6073.33  341.98
   2  -2   2 6525.47  426.24
  -2   2  -2 5817.80  354.03
  -2  -2  -2 5792.14  333.69
   2   2   2 5443.52  336.07
  -2   2  -3269897.0 1313.00
   2  -2   4  500.87  218.93
   2   2   4  339.63  168.74
  -2  -2  -4   58.19  122.70
  -2  -2  -4   61.65   27.87
   2  -2   4  161.90  123.53
  -2   2  -4  135.22  133.02
   2   2   4   47.10   37.45
   2  -2   5  803.05  267.69
   2   2   5 1176.49  377.66
  -2  -2  -5  672.30  317.31
   2  -2   5 1301.74  412.59
  -2   2  -5  967.92  215.47
   2   2   5  999.33   83.40
   2   2   5  729.42   78.28
   2  -2   6  344.64  291.40
   2   2   6  511.90  244.07
   2  -2   6  394.39  221.10
  -2   2  -6  221.75   82.55
   2  -2   750316.89 1620.43
   2   2   748706.81 1726.06
   2  -2   749280.90 1497.06
   2  -2   8  373.81  297.12
   2   2   8  187.63  114.95
   2  -2   8   30.00  120.99
   2  -2   9 5626.50  692.48
   2   2   9 4243.92  499.45
   2  -2   9 4802.18  633.80
   2  -2  10 2095.75  845.10
   2   2  10 2904.73  811.44
   2  -2  10 1881.27  313.69
   2  -2  1144425.62 2445.33
   2   2  1140368.55 2335.99
   2  -2  1140638.97 2197.59
   2  -2  12  516.31  136.65
   2   2  12  215.26  215.41
   2  -2  12  120.19   93.13
   2  -2  13 1349.80  608.00
   2   2  13 1503.36  467.88
   2  -2  13 1272.15  220.46
   2  -2  14  440.12  497.65
   2   2  14 1161.36  562.94
   2  -2  1510139.61 1187.66
   2   2  15 8226.32  551.77
   2  -2  16  931.02  607.12
   2   2  16 2306.75  502.18
   2  -2  17  598.05  316.15
   2   2  17 1493.37  557.34
   2  -2  18  886.63  292.20
   2   2  18  581.38  187.19
   2  -2  19 3923.47  592.84
   2   2  19 3011.03  477.26
   2   2  20   95.87  210.33
  -2  -3  20 2547.29  904.28
  -2   3  20 3702.15  475.90
  -2  -3  19 2013.45  948.54
  -2   3  19 1898.11  805.13
  -2  -3  18  494.24  220.25
  -2   3  18  399.24  172.93
  -2  -3  17 1986.34  399.96
  -2   3  17  785.90  457.96
  -2  -3  16 6926.17  838.83
  -2   3  16 5913.09  607.35
  -2  -3  16 5788.33  579.72
  -2  -3  15  848.20  347.82
  -2   3  15  554.58  364.86
  -2  -3  15   85.63  202.82
  -2   3  15   94.43  120.45
  -2   3  14   94.11  221.51
  -2  -3  14  426.66  173.08
  -2   3  14   -2.60   70.97
  -2   3  13  296.75  329.40
  -2  -3  13  334.58  279.85
  -2   3  13  435.53  319.95
  -2   3  1211556.56 1487.12
  -2  -3  1210676.18  910.07
  -2   3  1210845.99  957.34
  -2  -3  11 5601.00  691.43
  -2   3  11 4697.71  607.99
  -2  -3  11 5547.56  510.28
  -2   3  11 7429.66  659.17
  -2  -3  1014407.22 1000.95
  -2   3  1015526.98  530.37
  -2  -3  1012224.09 1000.00
  -2   3  1013766.26 1025.19
  -2  -3   9 3411.66  675.87
  -2   3   9 2445.74  277.20
  -2  -3   9 3522.40  661.24
  -2   3   9 2923.20  234.35
   2  -3  -825506.98  947.53
  -2  -3   821753.22 1464.21
  -2  -3   823111.60  997.29
  -2   3   824039.83  884.71
   2  -3  -718527.17 1148.29
  -2  -3   718868.40 1061.36
  -2   3   719233.32 1060.40
  -2  -3   720704.02 1154.56
  -2   3   720636.22 1143.56
   2  -3  -6 3701.84  545.78
  -2  -3   6 4007.36  797.97
  -2   3   6 3207.69  286.08
  -2  -3   6 2820.08  325.15
  -2   3   6 3432.21  407.34
  -2  -3   5   85.54   76.13
   2  -3  -5  273.41  160.04
  -2   3   5  169.37  155.68
  -2  -3   5  215.05   91.54
  -2   3   5   29.21  133.61
  -2  -3   5  399.36  390.18
   2   3  -5   96.05   95.51
  -2   3   5  362.77  228.30
  -2  -3   419605.86  576.22
   2  -3  -416125.89  927.63
  -2   3   416639.08  499.30
  -2  -3   419145.98  559.91
   2  -3  -418123.54  556.26
  -2   3   418014.76  727.44
  -2  -3   418009.44  599.46
   2   3  -417633.45  534.44
  -2  -3   310789.24  610.00
   2  -3  -311190.89  629.16
  -2   3   310256.23  564.40
  -2  -3   310433.59  583.60
   2  -3  -311576.75  671.60
  -2   3   311185.81  685.96
  -2  -3   310245.25  942.21
   2   3  -312181.84  704.88
   2   3  -211464.48  622.76
  -2  -3   210954.23  585.48
   2  -3  -210044.36  563.14
  -2   3   211647.05  630.04
   2  -3  -212248.48  697.87
  -2   3   210803.55  671.04
  -2  -3   210945.52  648.01
   2   3  -211363.32  640.08
   2   3  -1 5677.13  336.60
   2  -3  -1 5204.12  349.24
  -2   3   1 5144.72  336.75
  -2   3   1 4433.04  321.15
  -2  -3   1 5074.62  383.57
   2   3  -1 4392.86  340.11
   2   3   066497.55 1460.00
   2  -3   064274.34 1514.70
  -2   3   061584.55 1410.98
   2  -3   068938.20 1642.45
  -2   3   061223.41 1453.03
  -2  -3   063821.29 1498.56
   2   3   065190.44 1514.99
   2   3   117271.32  415.91
   2  -3   115240.02  823.71
  -2   3  -115465.45  824.12
   2  -3   117277.80  559.39
  -2   3  -116277.50  382.47
  -2  -3  -117360.36  519.58
   2   3   115112.64  791.13
   2  -3   2 6892.55  432.06
   2   3   2 5717.59  333.27
  -2   3  -2 5794.02  496.15
   2  -3   2 6992.81  507.93
  -2   3  -2 6451.17  419.16
  -2  -3  -2 6600.16  435.40
   2   3   2 6141.81  354.17
   2  -3   3 7230.93  465.56
   2   3   3 8078.04  442.30
  -2   3  -3 8822.08  507.61
  -2  -3  -3 7227.28  395.98
   2  -3   3 8500.94  528.92
  -2  -3  -3 7801.72  435.59
  -2   3  -3 7825.88  490.59
   2   3   3 8151.61  501.20
   2  -3   490558.53 2862.24
   2   3   497250.81 2908.34
  -2   3  -488413.68 2679.39
  -2  -3  -497009.76 2888.80
   2  -3   491551.02 2779.88
  -2   3  -498600.36 2969.91
   2   3   491863.34 2721.82
   2  -3   511251.17  721.53
   2   3   511333.86  665.20
  -2  -3  -510265.15  598.61
  -2  -3  -511392.59  651.08
   2  -3   511927.00  729.83
  -2   3  -511841.60  692.15
   2   3   510738.01  588.81
   2   3   618847.05 1037.88
  -2  -3  -615312.01  866.62
   2  -3   615904.21  917.57
   2   3   616079.74  842.26
  -2   3  -616229.00  899.88
   2   3   617695.43  921.90
   2   3   7 2937.47  506.48
   2  -3   7 3085.66  566.62
   2   3   7 2885.39  120.45
  -2   3  -7 3185.85  226.80
   2   3   7 3016.32  135.94
   2  -3   828641.70 1131.17
   2   3   824518.10 1088.05
   2  -3   827314.76 1123.75
   2   3   827603.52  945.56
  -2   3  -826258.09 1029.76
   2   3   827914.10  950.70
   2  -3   9 6386.66  580.09
   2   3   9 8287.20  938.39
   2  -3   9 6752.45  537.50
   2   3   9 5791.28  338.23
   2   3   9 5903.42  339.04
  -2   3  -9 7260.79  832.41
   2   3  1017170.82 1275.97
   2  -3  1014615.35  883.51
  -2   3 -1014477.24  894.68
   2  -3  11  657.62  311.43
   2   3  11  807.35  340.88
   2  -3  11  487.64  272.95
   2  -3  1211598.40  880.81
   2   3  1216077.76 1460.72
   2  -3  1211289.26  743.98
   2  -3  13 2707.50  717.52
   2   3  13 1732.54  362.49
   2  -3  13 2745.59  494.89
   2  -3  14 1310.26  372.66
   2   3  14  709.63  275.85
   2  -3  15  346.57  196.15
   2   3  15  205.84  205.87
   2  -3  16  714.90  514.04
   2   3  16 1225.24  480.87
   2  -3  17 2057.80  652.56
   2   3  17 1932.33  615.48
   2  -3  18 1592.04  862.92
   2   3  18 1058.89  701.75
   2  -3  19  337.07  394.99
   2   3  19  249.85  241.71
   2   3  20 1730.40 1237.33
  -2   4  20  198.78   91.36
  -2   4  19  868.60  446.41
  -2   4  18 5820.75 1234.02
  -2  -4  17 2371.31  328.68
  -2   4  17 1262.97  562.72
  -2  -4  16 2767.91  398.20
  -2   4  16 2288.36  471.84
  -2  -4  16 2451.60  343.66
  -2  -4  15  515.51  154.99
  -2   4  15  777.35  295.30
  -2  -4  15  900.76  531.87
  -2  -4  14 7856.69  889.49
  -2   4  14 8511.90 1653.69
  -2  -4  14 7740.38  835.86
  -2   4  14 8680.24  689.78
  -2  -4  13  383.42  234.10
  -2   4  13  279.01  386.03
  -2  -4  13  335.51  353.69
  -2   4  13  107.87  129.68
  -2  -4  12 4330.58  696.02
  -2   4  12 4540.00  356.10
  -2  -4  12 4554.51  527.77
  -2   4  12 4601.74  470.91
  -2  -4  11  319.87  335.48
  -2   4  11  255.20  180.48
  -2  -4  11  246.96  214.25
  -2   4  11  174.33  305.36
  -2  -4  1033490.69 1523.68
  -2   4  1034948.72 1536.83
  -2  -4  1030916.34 1395.43
  -2   4  1032089.97 1495.12
  -2  -4   911421.62  781.93
  -2   4   9 8716.45  343.92
  -2  -4   910224.05  752.06
  -2   4   910248.46  667.02
   2  -4  -8 6129.82  795.30
  -2  -4   8 5894.04  536.44
  -2  -4   8 5452.74  468.95
  -2   4   8 6348.82  455.47
   2  -4  -7 1298.58  379.91
  -2  -4   7 1550.95  516.01
  -2  -4   7 1658.73  274.19
  -2   4   7 1382.78  239.83
   2  -4  -642522.51 1423.74
  -2  -4   644879.52 1478.44
  -2   4   641315.05 1351.41
  -2  -4   644230.13 1507.53
  -2   4   641636.10 1376.52
  -2  -4   546048.36 1544.98
   2  -4  -547799.31 1701.46
  -2   4   547222.36 1482.98
  -2  -4   549871.74 1593.19
   2  -4  -551591.88 1652.58
  -2   4   549378.96 1589.78
  -2  -4   551110.14 1674.29
  -2  -4   4 5599.54  455.18
   2  -4  -4 6125.94  472.31
  -2   4   4 5713.45  421.16
  -2  -4   4 6444.28  521.21
   2  -4  -4 5852.57  690.39
  -2   4   4 5896.12  692.99
  -2  -4   4 6213.43  548.89
   2   4  -4 5169.08  424.66
  -2  -4   3 1230.14  361.76
   2  -4  -3 1300.80  138.23
  -2   4   3 1199.89  275.31
  -2  -4   3 1396.97  295.44
   2  -4  -3 1055.16  333.14
  -2   4   3 1266.84  263.09
  -2  -4   3  696.46  192.51
   2   4  -3 1339.77  532.63
  -2  -4   223146.51  588.62
   2  -4  -223324.46  661.20
  -2   4   222667.92  602.63
  -2  -4   222160.39  571.95
   2  -4  -222359.71  674.11
  -2   4   221317.16  638.30
  -2  -4   222178.37  755.58
   2  -4  -121100.70  575.60
  -2   4   120636.87  552.36
  -2  -4   120116.19  497.09
   2  -4  -120825.52  629.79
  -2  -4   118930.99  636.76
   2   4  -120587.91  593.99
  -2  -4   010733.56  542.58
   2  -4   011912.19  658.57
  -2   4   0 9934.64  572.96
   2  -4   011075.86  647.52
  -2   4   0 9859.60  572.64
  -2  -4   0 9910.17  625.32
   2   4   010183.36  627.19
   2   4   1 2384.93   87.11
   2  -4   1 2364.96  383.41
  -2   4  -1 2243.11  137.67
  -2  -4  -1 2142.59   64.54
   2  -4   1 2231.23  229.93
  -2   4  -1 2453.70  312.23
   2   4   1 2577.22  504.57
   2  -4   2 2665.21  215.27
   2   4   2 3369.15  230.98
  -2   4  -2 3401.98  252.33
  -2  -4  -2 3283.36  209.81
   2  -4   2 3456.23  621.71
  -2   4  -2 3809.47  360.63
  -2  -4  -2 3108.66  279.33
   2   4   2 3501.65  279.38
   2  -4   317744.06  988.33
   2   4   320766.03 1105.01
  -2   4  -319868.06 1073.52
   2  -4   318780.52 1066.09
  -2  -4  -319935.51 1067.44
  -2   4  -318674.22 1022.49
   2   4   319999.85 1062.51
   2  -4   439279.46 1300.34
   2   4   445348.34 1434.50
  -2  -4  -441720.09 1364.30
   2  -4   440513.07 1425.95
  -2   4  -439351.26 1293.87
   2   4   441295.72 1279.25
   2  -4   511695.18  713.68
   2   4   511217.68  726.28
  -2  -4  -512114.27  710.69
  -2  -4  -511134.61  623.80
   2  -4   511180.27  714.40
   2   4   510806.82  629.60
  -2   4  -510304.85  670.81
   2  -4   624432.55  994.10
   2   4   624727.01  827.06
  -2  -4  -626166.04  809.06
   2  -4   624627.42  890.10
   2   4   627742.15  896.03
  -2   4  -624564.69  924.15
   2  -4   7 2963.09  833.87
   2   4   7 4351.60  572.53
   2  -4   7 3861.24  443.13
   2   4   7 3455.67  172.57
  -2   4  -7 4518.33  600.17
   2   4   7 3097.35  166.34
   2  -4   8 7526.72  767.61
   2   4   8 8001.26  794.91
   2  -4   8 6729.57  829.37
   2   4   8 6742.02  602.11
   2   4   8 6701.89  571.82
   2   4   9 1118.30  288.24
   2  -4   9  974.96  452.04
   2   4   9  654.48  133.34
   2   4   9  833.09  135.24
   2   4  10 7435.08  563.42
   2  -4  10 6081.88  538.50
   2   4  10 7530.23  479.64
   2   4  10 7727.95  432.13
   2   4  11 3424.88  379.97
   2  -4  11 3725.66  411.14
   2  -4  12 7427.67  659.84
   2   4  12 8984.13  992.09
   2  -4  12 6105.26  606.33
   2  -4  13  337.36  258.25
   2   4  13  733.60  219.41
   2  -4  13  526.68  232.66
   2  -4  14 2789.07  846.48
   2   4  14 1470.52  930.03
   2  -4  15 1006.12  259.80
   2   4  15  860.26  323.95
   2  -4  16 3225.68  694.67
   2   4  16 4464.76  542.41
   2  -4  17  118.47  378.91
   2   4  17   43.83  258.79
   2  -4  18 3098.80  772.11
   2   4  18 4373.09  678.00
   2  -4  19 1202.16  593.82
   2   4  19 1496.28  293.10
   2   4  20  485.33  205.82
  -2   5  20   21.44  262.03
  -2  -5  19 6434.57 1275.19
  -2   5  19 7890.07  556.77
  -2  -5  18  242.96  223.10
  -2   5  18  230.39  132.24
  -2  -5  17  675.22  615.71
  -2   5  17  723.01  239.16
  -2  -5  16 2078.58  757.39
  -2   5  16  860.90  732.50
  -2  -5  16  862.43  309.45
  -2  -5  1515689.12 1533.59
  -2   5  1512686.44 1517.51
  -2  -5  1513104.26 1163.95
  -2  -5  14  220.69  109.78
  -2   5  14  228.94  164.39
  -2  -5  14   59.12  155.29
  -2   5  14   49.82   93.21
  -2  -5  13  809.83  544.87
  -2   5  13 1004.40  282.61
  -2  -5  13  857.19  299.08
  -2   5  13  629.44  313.67
  -2  -5  12  407.60  469.27
  -2   5  12  822.32  385.75
  -2  -5  12  835.14  650.09
  -2   5  12  729.78  339.28
  -2  -5  1130854.13 1709.91
  -2   5  1131064.43 1686.18
  -2  -5  1128398.40 1680.92
  -2   5  1130172.43 1697.22
  -2  -5  10  658.18  370.60
  -2   5  10  372.60  351.24
  -2  -5  10  317.44  147.75
  -2   5  10  360.82  108.22
  -2  -5   9 4256.55  436.38
  -2   5   9 4776.43  745.94
  -2  -5   9 4189.44  598.29
  -2   5   9 4223.97  439.22
   2  -5  -8 3478.43  424.96
  -2  -5   8 5488.41  567.94
  -2  -5   8 5087.92  590.90
  -2   5   8 5529.93  761.27
   2  -5  -732582.55 1163.41
  -2  -5   730711.67 1071.62
  -2  -5   730381.00 1345.91
  -2   5   733297.71 1092.30
   2  -5  -6 2859.07  553.34
  -2  -5   6 3020.29  806.29
   2  -5  -6 3218.12  661.67
  -2  -5   6 3613.51  942.82
  -2  -5   5  159.99   96.32
   2  -5  -5   47.74  192.08
  -2   5   5  364.21  114.34
  -2  -5   5  363.90  342.09
   2  -5  -5  456.12  250.03
  -2  -5   5  545.77  230.77
  -2  -5   4 7535.03  545.53
   2  -5  -4 6580.54  489.69
  -2   5   4 6260.00  488.54
  -2  -5   4 7191.55  584.23
   2  -5  -4 7557.14  597.57
  -2  -5   4 7414.13  635.67
  -2  -5   351150.48 1709.94
   2  -5  -355660.30 1716.23
  -2  -5   349512.54 1535.06
   2  -5  -352802.64 1701.75
  -2  -5   353240.63 1733.00
   2  -5  -2 4483.63  376.27
  -2   5   2 5021.60  374.43
  -2  -5   2 5272.00  392.04
   2  -5  -2 4154.92  419.79
  -2   5   2 5160.16  474.59
  -2  -5   2 4555.71  469.08
  -2  -5   1 1302.15   96.06
   2  -5  -1 1504.70  181.32
  -2   5   1 1223.47  162.98
  -2  -5   1 1583.64  142.09
   2  -5  -1 1711.13  386.24
  -2   5   1 1476.91  497.90
  -2  -5   1 1870.75  599.11
   2   5  -1 2040.19  587.66
   2  -5   0 1639.59  493.69
  -2   5   0 1420.66  390.23
   2  -5   0 1453.74  484.39
  -2   5   0 1901.72  459.27
  -2  -5   0 1279.91  341.78
   2   5   0 1603.82  420.05
   2  -5   116603.21  901.04
  -2   5  -115304.77  838.60
   2  -5   119323.40 1123.25
  -2   5  -115887.57  905.66
  -2  -5  -116032.91  932.11
   2   5   115634.60 1016.61
   2   5   2  123.43   33.43
   2   5   2  132.68   40.62
   2  -5   2  295.75  149.66
  -2   5  -2  411.79  112.27
   2  -5   2  276.89  320.12
  -2  -5  -2  226.39  175.56
  -2   5  -2  181.22  107.18
   2   5   2   59.06  132.94
   2   5   3  853.92  199.01
   2  -5   3 1389.85  406.42
   2   5   3 1037.82  225.98
  -2   5  -3  675.49  175.85
   2  -5   3  658.55  337.30
  -2  -5  -3 1058.55  305.55
   2   5   3  874.24  265.70
   2   5   410716.28  594.31
   2  -5   410654.52  654.40
   2   5   4 9648.15  537.42
  -2  -5  -410489.09  847.01
   2  -5   4 9698.31  613.69
   2   5   411086.87  630.95
   2  -5   526541.42  978.95
   2   5   526972.18  862.49
  -2  -5  -525324.89  928.43
   2  -5   527070.06  952.75
   2   5   524563.83  828.57
   2   5   6 2483.03  332.19
   2  -5   6 2807.72  267.70
   2   5   6 2320.49  165.95
   2  -5   6 3148.98  274.03
   2   5   6 3037.33  313.91
   2  -5   7 1269.78  284.11
   2   5   7 1128.20  427.23
  -2  -5  -7 1077.28  295.46
   2  -5   7 1019.26  389.41
   2   5   7  641.47  224.93
   2  -5   8 1808.69  733.78
   2   5   8 1823.91  426.42
   2  -5   8 1235.26  384.81
   2   5   8 1169.54  181.13
   2   5   8 1399.35  190.58
   2  -5   921722.31 1137.57
   2   5   922178.78 1147.32
   2  -5   920187.71 1006.23
   2   5   920190.01  842.44
   2   5   921646.53  908.25
   2  -5  10  418.37  264.19
   2   5  10  405.07  241.73
   2  -5  10  753.05  341.80
   2   5  10  211.26  116.30
   2   5  10   76.14   79.49
   2  -5  11 1355.12  576.69
   2   5  11  981.30  362.33
   2  -5  11 1240.82  425.01
   2   5  11  621.18  140.53
   2  -5  12 1524.68  404.28
   2   5  12 1761.11  489.61
   2  -5  12  819.94  302.79
   2  -5  13 9347.42  839.20
   2   5  13 9360.65  816.27
   2  -5  13 7335.17  678.27
   2   5  14  170.17  159.71
   2   5  15  117.72  133.57
   2   5  16  172.67  290.62
   2  -5  1710071.79 1754.53
   2   5  1712972.30  844.04
   2  -5  18  736.42  259.07
   2   5  18  213.66  247.09
   2   5  19  296.44  273.45
   2   5  20  384.17  214.15
  -2   6  20  731.55  497.15
  -2  -6  19  990.57  593.78
  -2   6  19 1191.25  568.32
  -2  -6  18 2550.20  680.73
  -2   6  18 4993.27  422.75
  -2  -6  17 2392.94  704.36
  -2   6  17 1458.88  603.03
  -2  -6  16  739.86  396.11
  -2   6  16  576.11  441.39
  -2  -6  16  515.25  159.51
  -2  -6  15 2487.57 1060.63
  -2   6  15 1222.69  626.14
  -2  -6  15 1550.16  451.63
  -2  -6  14 9914.47  626.65
  -2   6  1410406.62  735.87
  -2  -6  1410298.93  823.23
  -2   6  14 9395.48  429.53
  -2  -6  13 5171.13  914.90
  -2   6  13 4573.31  391.76
  -2  -6  13 6030.47  895.21
  -2   6  13 5472.64  369.36
  -2  -6  12  680.26  296.40
  -2   6  12  426.82  209.29
  -2  -6  12  434.86  346.84
  -2   6  12  514.82  259.68
  -2  -6  11  427.94  184.17
  -2   6  11 1002.09  316.98
  -2  -6  11  707.24  209.02
  -2   6  11  559.26  157.11
  -2  -6  10  704.88  329.20
  -2   6  10 1321.81  435.96
  -2  -6  10 1108.49  456.53
  -2   6  10  280.83  454.71
  -2  -6   9 9860.25  780.25
  -2  -6   912675.76  944.49
  -2   6   910838.01  747.28
   2  -6  -8 3552.63  407.09
  -2  -6   8 5537.09  595.20
  -2  -6   8 5298.67 1040.79
  -2   6   8 3400.29  303.45
   2  -6  -7    0.14   88.10
  -2  -6   7   69.02  225.53
   2  -6  -7   87.90   66.27
  -2  -6   7   88.09  236.05
   2  -6  -628634.62 1013.53
  -2  -6   629294.01 1005.94
   2  -6  -630026.06 1045.31
  -2  -6   626947.05 1152.09
   2  -6  -521395.98 1250.01
  -2   6   519050.19 1042.70
  -2  -6   517730.20 1066.56
   2  -6  -522646.51 1256.25
  -2  -6   517180.17 1069.68
  -2  -6   4 7793.90  638.46
   2  -6  -4 6916.51  487.32
  -2   6   4 7555.20  521.96
  -2  -6   4 6784.20  512.74
   2  -6  -4 7637.65 1075.60
  -2  -6   4 8672.24 1231.57
  -2  -6   3 5778.96  494.82
   2  -6  -3 5806.19  441.69
  -2   6   3 5513.62  501.91
  -2  -6   3 5172.11  381.29
   2  -6  -3 6430.15 1013.86
  -2  -6   3 5636.73  489.84
   2  -6  -212466.99  691.96
  -2   6   212139.72  798.98
  -2  -6   212613.88  686.10
   2  -6  -211171.76 1156.47
  -2  -6   212005.07  796.00
  -2  -6   124615.33  768.15
   2  -6  -124159.05  812.13
  -2   6   123696.26  804.52
  -2  -6   126288.48  811.76
   2  -6  -123562.31  943.32
  -2  -6   126745.54 1045.49
   2  -6   0 5653.80  468.46
  -2   6   0 5811.38  431.74
   2  -6   0 6573.77  877.92
  -2  -6   0 6408.44  541.21
   2  -6   122551.34  785.44
  -2   6  -122273.64  408.19
   2  -6   125197.44 1069.16
  -2  -6  -125946.05  968.65
   2  -6   219785.10 1080.63
  -2   6  -217635.61  983.76
   2  -6   221491.67 1233.09
  -2  -6  -215732.78  921.03
   2   6   327548.87  809.97
   2  -6   326563.04  896.98
   2   6   327406.12  799.20
   2  -6   325301.81 1049.72
  -2  -6  -325187.16  985.33
   2   6   327440.18  915.80
   2   6   4  582.41  113.54
   2  -6   4  668.14  287.39
   2   6   4  309.97  147.68
  -2  -6  -4  674.32  137.20
   2  -6   4  269.18  222.26
   2   6   4  164.19   77.35
   2   6   510575.66  671.95
   2  -6   511655.12  473.69
   2   6   511643.59  282.55
  -2  -6  -512944.34  760.90
   2  -6   512348.93 1192.90
   2   6   511167.44  768.18
   2   6   6  110.71   68.66
   2  -6   6  417.16  205.68
   2   6   6   91.11  182.19
  -2  -6  -6  216.75  176.85
   2  -6   6  153.42  157.22
   2   6   6  174.67  101.85
   2  -6   7 9734.30  723.09
   2   6   7 8810.45  688.51
  -2  -6  -7 7443.91  714.74
   2  -6   710019.31  851.77
   2   6   7 9023.96  602.13
   2  -6   8 7469.19  722.12
   2   6   8 6849.90  490.23
  -2  -6  -8 7074.28  421.75
   2  -6   8 7393.98  564.42
   2   6   8 5972.15  471.67
   2  -6   9  227.57  169.31
   2   6   9  179.92   73.94
   2  -6   9  226.44  272.10
   2   6   9   64.75   74.27
   2   6   9   63.81   75.14
   2  -6  10 6163.92 1221.30
   2   6  10 5656.35  420.69
   2  -6  10 5796.44  538.39
   2   6  10 4386.45  241.41
   2  -6  1118315.55 1616.44
   2   6  1117380.27 1080.54
   2  -6  1115385.46 1294.93
   2  -6  12 9440.80 1452.87
   2   6  1210154.08 1112.35
   2  -6  1210126.35  769.23
   2  -6  13 3414.18 1145.56
   2   6  13 4448.40  480.58
   2  -6  13 3720.93  427.45
   2  -6  14 6537.34  624.37
   2   6  14 7000.74  780.62
   2  -6  1514992.62 1382.16
   2   6  1515212.02 1404.72
   2  -6  16 1743.07 1015.15
   2   6  16 2124.22  908.96
   2  -6  17  424.10  265.07
   2   6  17   77.96  213.91
   2  -6  18 1160.63  896.12
   2   6  18  712.76  215.48
   2   6  19 1104.11  804.03
  -2   7  20 2920.45  687.70
  -2  -7  19  239.30  357.71
  -2   7  19   57.26  168.38
  -2  -7  18  394.91  532.19
  -2   7  18  264.87  169.89
  -2  -7  17  544.04  527.04
  -2   7  17   94.31  248.75
  -2  -7  16 9792.90 1089.19
  -2   7  16 9462.18 1571.93
  -2  -7  16 7697.66  899.32
  -2  -7  15  387.96  240.12
  -2   7  15  107.35  272.25
  -2  -7  15  240.46  121.06
  -2  -7  14 4058.92 1412.46
  -2   7  14 3798.74  341.97
  -2  -7  14 2514.87  970.85
  -2  -7  13  139.77  218.59
  -2   7  13  169.41  341.68
  -2  -7  13  166.09  151.96
  -2   7  13   33.00  103.00
  -2  -7  1230168.52 1630.08
  -2   7  1229278.58 1625.32
  -2  -7  1232003.53 1777.63
  -2   7  1230912.02 1678.07
  -2  -7  11  761.32  274.90
  -2   7  11  309.92  319.27
  -2  -7  11 1200.67  566.62
  -2   7  11 1225.67  489.54
  -2  -7  10 3658.13  868.08
  -2   7  10 3488.95  412.90
  -2  -7  10 2415.36  397.88
  -2   7  10 2257.43  227.40
  -2  -7   9 1930.15  476.87
  -2  -7   9 1433.74  841.87
  -2   7   9 1849.43  634.47
   2  -7  -821085.65 1033.09
  -2  -7   820188.25  931.62
   2  -7  -821148.45 1000.17
  -2  -7   820115.38 1469.62
   2  -7  -7  737.61  103.68
  -2  -7   7  985.59  248.35
   2  -7  -7  666.13  172.65
  -2  -7   7 1116.50  362.30
   2  -7  -6 7047.45  641.95
  -2  -7   6 6670.27  620.24
   2  -7  -6 7737.94  772.96
  -2  -7   6 6298.22  625.13
   2  -7  -5  844.79  362.34
  -2   7   5  926.34  234.41
  -2  -7   5 1088.36  332.34
   2  -7  -5  885.26  613.45
  -2  -7   5 1545.35  501.65
  -2  -7   415253.27 1043.68
   2  -7  -416337.88  913.12
  -2   7   414990.81  818.92
  -2  -7   414786.02  811.05
   2  -7  -414146.80 1016.24
  -2  -7   417615.43 1053.15
  -2  -7   3  166.58  130.07
   2  -7  -3  120.73  135.46
  -2   7   3   58.64   56.79
  -2  -7   3  202.16  100.98
   2  -7  -3  239.28  172.04
  -2  -7   3  -70.40  240.39
   2  -7  -218205.82  979.07
  -2   7   216705.17  939.63
  -2  -7   217820.30  949.55
   2  -7  -217297.10 1021.51
  -2  -7   1   50.81   37.15
   2  -7  -1   94.29   68.85
  -2   7   1   32.68   61.78
  -2  -7   1   68.62   56.66
  -2  -7   1  276.93  187.46
   2  -7   055566.92 1721.85
  -2   7   055926.25 1663.24
  -2  -7   056164.74 1896.99
   2  -7   1  723.76  179.25
  -2   7  -1   55.60  115.71
   2  -7   1   31.22  219.32
  -2  -7  -1   52.23  193.00
   2  -7   215620.36  899.28
   2  -7   214762.54 1040.80
  -2  -7  -216997.82 1057.60
   2  -7   317175.76  983.53
   2  -7   319028.08 1274.52
  -2  -7  -318124.77 1033.13
   2   7   452148.35 1512.73
   2  -7   449774.37 1656.64
   2   7   449710.63 1443.36
  -2  -7  -455137.85 1755.72
   2  -7   449790.24 1836.34
   2   7   5 7296.47  628.97
   2  -7   5 8842.36  662.19
   2   7   5 7397.69  657.99
  -2  -7  -5 7905.73  721.48
   2  -7   5 8917.77  665.23
   2   7   6 3329.76  222.93
   2  -7   6 2787.67  335.72
   2   7   6 3241.06  158.83
  -2  -7  -6 4819.94  502.99
   2  -7   6 4708.51 1066.11
   2   7   7  126.43   61.26
   2  -7   7  230.58  173.20
   2   7   7   92.63   94.04
  -2  -7  -7  229.79  178.53
   2  -7   7  586.49  267.91
   2  -7   822486.86 1523.71
   2   7   822717.16 1265.30
  -2  -7  -821075.17 1209.12
   2  -7   820520.36 1231.70
   2  -7   9  745.14 1085.97
   2   7   9  885.32  331.48
  -2  -7  -9 1310.20  310.64
   2  -7   9  857.03  388.03
   2  -7  1012998.28 1537.34
   2   7  1010620.43  851.20
   2  -7  1011139.82 1259.17
   2   7  1010237.26  702.06
   2  -7  11 1002.15  343.66
   2   7  11  145.08   80.06
   2  -7  11  171.49  137.03
   2  -7  12 1961.38  419.97
   2   7  12 2778.53  534.04
   2  -7  12 1018.50  512.47
   2  -7  13  304.72  236.24
   2   7  13  156.33   99.60
   2  -7  13   -4.28  113.21
   2  -7  14 1472.47  464.55
   2   7  14 1058.17  350.39
   2  -7  14 1213.11  517.52
   2  -7  15  838.07  530.40
   2   7  15  457.07  285.69
   2  -7  16 4990.04 1679.98
   2   7  16 6369.72  746.92
   2  -7  17  327.46  459.49
   2   7  17  418.68  208.03
   2  -7  18 2493.43 1510.52
  -2  -8  18 3166.37  587.63
  -2   8  18 1446.66  666.60
  -2  -8  17 2749.99 1330.98
  -2   8  17 1874.07  638.90
  -2  -8  16  -35.53  201.46
  -2   8  16  210.85  136.06
  -2  -8  16  453.33  272.15
  -2  -8  15 1271.13  669.37
  -2   8  15 1400.50  604.63
  -2  -8  15  349.95  597.75
  -2  -8  14 3861.15 1498.80
  -2   8  14 5187.51  469.22
  -2  -8  14 5735.52  659.93
  -2  -8  1311376.36 1211.99
  -2   8  1311393.71 1019.56
  -2  -8  1310153.42 1271.37
  -2   8  1311840.83 1066.83
  -2  -8  12   76.24  323.20
  -2   8  12  212.21  109.85
  -2  -8  12  167.67  162.20
  -2   8  12  193.19  126.08
  -2  -8  11  221.23  115.74
  -2   8  11  196.56  154.49
  -2  -8  11  123.28  236.13
  -2   8  11  205.15  309.72
  -2  -8  10  776.97  226.04
  -2   8  10  601.80  491.11
  -2  -8  10 1903.92  314.30
  -2   8  10 1788.31  274.36
  -2  -8   9 4316.02  936.42
  -2  -8   9 3831.28  874.57
  -2   8   9 4803.88  463.94
   2  -8  -8  512.86  252.54
  -2  -8   8  540.78  234.36
   2  -8  -8  304.92  206.40
  -2  -8   8  956.66  459.30
   2  -8  -7 2247.51  736.31
  -2  -8   7 2219.30  657.73
   2  -8  -7 1592.18  259.29
  -2  -8   7 2619.17  572.32
   2  -8  -622006.91 1010.52
  -2  -8   623320.43 1016.56
   2  -8  -624316.68 1168.73
  -2  -8   621023.93 1373.61
   2  -8  -522331.06  931.13
  -2   8   520243.56  795.65
  -2  -8   519239.70  768.84
   2  -8  -521088.37  948.17
  -2  -8   519392.26 1078.37
  -2  -8   417958.45 1078.24
   2  -8  -418000.58 1146.23
  -2   8   417653.89 1028.71
  -2  -8   417757.28 1046.88
   2  -8  -419023.11  855.78
  -2  -8   420286.44  946.87
   2  -8  -3 3311.67  417.90
  -2   8   3 2243.27  207.04
  -2  -8   3 2419.38  224.91
   2  -8  -3 4031.28  569.78
  -2  -8   3 4774.49 1058.71
  -2  -8   224266.28  866.05
   2  -8  -222621.78  953.34
  -2   8   223504.67  876.26
  -2  -8   223842.40  851.14
   2  -8  -224886.60 1080.95
  -2  -8   114239.74  749.50
   2  -8  -114946.08  839.39
  -2  -8   115358.27  799.54
  -2   8   115181.81  832.54
  -2  -8   115795.53  973.63
   2  -8   0 1586.17  264.17
  -2   8   0  969.77  138.78
   2  -8   0  875.15  301.41
  -2  -8   0 1417.15  709.88
   2  -8   1  588.22  110.81
  -2   8  -1  529.60  154.08
   2  -8   1   70.56  225.86
  -2  -8  -1  328.15  299.03
   2  -8   2 8821.10  577.39
   2  -8   2 9966.96  901.55
  -2  -8  -2 9369.62  673.40
   2  -8   325058.88 1014.53
  -2  -8  -325435.49 1053.67
   2  -8   325754.28 1104.54
   2   8   4 3845.48  326.96
   2  -8   4 4008.10  461.89
  -2  -8  -4 3791.66  427.84
   2  -8   4 3330.19  340.03
   2   8   5 4972.58  339.81
   2  -8   5 5351.22  417.46
   2   8   5 4863.11  310.60
  -2  -8  -5 4240.34  372.91
   2  -8   5 4260.01  403.04
   2   8   6 4417.76  410.73
   2  -8   6 4994.28  584.75
   2   8   6 4836.88  313.40
  -2  -8  -6 4232.69  534.31
   2  -8   6 5028.67  638.76
   2   8   720292.20 1152.83
   2  -8   721589.01 1272.59
   2   8   722730.34 1264.97
  -2  -8  -722529.78 1284.01
   2  -8   721766.16 1354.01
   2  -8   8 4592.00  951.52
   2   8   8 3673.01  503.96
  -2  -8  -8 2556.72  509.26
   2  -8   8 2638.38  282.96
   2  -8   9 1581.22  527.66
   2   8   9 2616.98  314.24
  -2  -8  -9 2203.27  328.57
   2  -8   9 1501.58  583.91
   2  -8  10  625.73  244.78
   2   8  10  114.58  158.79
   2  -8  10  320.83  344.54
   2   8  10   93.37   98.82
   2  -8  11 6429.50 1143.68
   2   8  11 5469.56  351.14
   2  -8  11 5972.27  590.82
   2  -8  12 2950.91  972.85
   2   8  12 3238.81  950.10
   2  -8  12 4037.92  461.26
   2  -8  13 1544.48  607.54
   2   8  13  262.18  368.47
   2  -8  13  513.55  387.40
   2  -8  14 2167.28 1095.75
   2   8  14 3167.48  577.00
   2  -8  14 2982.87  455.45
   2  -8  1510070.99 1104.13
   2   8  15 9739.70 1084.39
   2  -8  16  328.05  318.74
   2  -8  17  -25.25  241.59
  -2  -9  18  290.87  287.90
  -2  -9  17  673.30  477.49
  -2  -9  16 2042.56  926.99
  -2   9  16  821.80  411.27
  -2  -9  16  639.79  498.42
  -2  -9  15 9345.56 1036.79
  -2   9  1511543.41 1177.89
  -2  -9  15 9737.27 1154.81
  -2  -9  14 1652.15  824.07
  -2   9  14  599.29  448.89
  -2  -9  14  628.20  501.63
  -2  -9  13 1014.14  220.66
  -2   9  13 1729.61  383.13
  -2  -9  13 1558.93  699.59
  -2   9  13 1414.01  318.77
  -2  -9  12 1008.79  392.58
  -2   9  12 1355.88  293.56
  -2  -9  12  386.72  429.22
  -2   9  12  843.77  317.38
  -2  -9  1124411.84 1475.97
  -2   9  1120220.69 1146.40
  -2  -9  1121665.34 2010.21
  -2   9  1120343.38 1380.30
  -2  -9  10 2664.61  554.35
  -2   9  10 2456.24  364.46
  -2  -9  10 2525.46  839.71
  -2   9  10 2464.14  703.49
  -2  -9   9  252.89  126.94
  -2   9   9  165.85  160.91
   2  -9  -9  310.25  173.48
  -2  -9   9  329.63  314.44
   2  -9  -8 6148.09  304.66
  -2  -9   8 6535.05  628.71
   2  -9  -8 5723.46  475.48
  -2  -9   8 7185.58  714.93
   2  -9  -7 4056.45  398.39
  -2  -9   7 4273.78  305.81
   2  -9  -7 4811.54  604.83
  -2  -9   7 5019.26 1088.57
   2  -9  -6 5712.40  704.71
  -2  -9   6 3871.25  356.31
   2  -9  -6 5279.08  647.11
  -2  -9   6 5567.14  558.41
   2  -9  -5 3502.00  539.28
  -2  -9   5 3329.33  532.84
   2  -9  -5 4702.90  750.36
  -2  -9   5 2935.63  426.61
  -2  -9   4  467.80  101.57
   2  -9  -4  682.35  243.76
  -2   9   4  419.43  150.41
  -2  -9   4  656.53  254.75
   2  -9  -4  102.95  367.55
  -2  -9   4  227.07  222.55
   2  -9  -340486.54 1685.16
  -2   9   339596.34 1596.08
  -2  -9   338823.07 1588.74
   2  -9  -338339.08 1896.31
  -2  -9   340731.22 1867.90
   2  -9  -2  106.74  117.65
  -2   9   2  162.00   64.46
  -2  -9   2  187.99  101.29
   2  -9  -2 -218.05  269.61
  -2  -9   2  397.36  210.41
  -2  -9   1  467.70  122.13
   2  -9  -1  552.50  201.22
  -2  -9   1  560.15  130.72
  -2   9   1  974.24  159.87
  -2  -9   1  934.48  301.65
   2  -9   0 5734.89  642.17
  -2   9   0 5640.47  501.80
   2  -9   0 7074.71  728.79
  -2  -9   0 7643.26 1001.29
   2  -9   122004.92  881.27
  -2  -9  -122697.90 1080.15
   2  -9   2 2763.21  513.96
   2  -9   2 2474.65  857.34
  -2  -9  -2 2259.51  430.62
   2  -9   3  514.87  135.73
   2  -9   3  484.98  605.64
  -2  -9  -3  461.51  277.53
   2  -9   4 3546.58  680.37
  -2  -9  -4 2034.76  248.25
   2  -9   4 3476.27  945.24
   2   9   527618.55 1455.74
   2  -9   528863.50 1619.08
   2   9   526270.09 1373.50
  -2  -9  -529178.73 1658.85
   2  -9   528141.61 1640.03
   2   9   6 5935.44  366.04
   2  -9   6 7457.82 1166.26
   2   9   6 5921.54  359.74
  -2  -9  -6 5285.31  602.17
   2  -9   6 6838.62  562.55
   2  -9   7 1522.33  572.20
   2   9   7  663.14  231.98
  -2  -9  -7 1439.90  422.54
   2  -9   7  543.33  486.26
   2  -9   8 1958.79  477.16
   2   9   8 1854.93  361.49
  -2  -9  -8 1345.54  489.91
   2  -9   8 1551.93 1018.84
   2  -9   912815.61  782.18
   2   9   911566.55  710.86
  -2  -9  -912802.14  716.98
   2  -9   912575.66 1697.28
   2  -9  10  158.71  163.73
   2   9  10  416.99  180.31
  -2  -9 -10   11.71  118.87
   2  -9  10  311.36  263.44
   2  -9  11  370.11  261.69
   2   9  11  229.93  126.75
   2  -9  11   92.30  114.87
   2  -9  12  174.97  340.46
   2   9  12  398.72  187.12
   2  -9  12  521.28  471.42
   2  -9  13 9866.14 1347.52
   2  -9  1311815.43  956.41
   2  -9  14  350.91  345.71
   2  -9  14  108.09  278.94
   2  -9  15  438.02  186.55
   2  -9  16  244.04  239.48
   2  -9  17 2033.79 1094.15
  -2 -10  18 2063.36 1282.90
  -2 -10  17  114.36  259.70
  -2 -10  16 1249.87  664.11
  -2 -10  16  777.97  601.59
  -2 -10  15  836.81  315.77
  -2 -10  15  -17.10  139.07
  -2 -10  14 4948.01 1250.88
  -2  10  14 5350.94  673.32
  -2 -10  14 3964.58  481.92
  -2 -10  13 2283.16  835.63
  -2  10  13 1421.28  674.15
  -2 -10  13 1786.35  651.02
  -2  10  13 1606.83  440.48
  -2 -10  12 3642.77  408.17
  -2  10  12 2450.00  865.09
  -2 -10  12 1161.37  563.10
  -2  10  12 2404.50  449.58
  -2 -10  11 1146.51  199.01
  -2  10  11 1375.40  310.84
  -2 -10  11 1575.41  568.05
  -2  10  11 1548.27  452.21
  -2 -10  1010359.61  752.38
  -2  10  10 9481.58  706.97
  -2 -10  1010026.18  830.47
  -2 -10   9 3953.22  935.60
  -2  10   9 3712.23  248.35
   2 -10  -9 3315.83  935.11
  -2 -10   9 4379.29  413.09
   2 -10  -8 1085.86  339.55
  -2 -10   8  899.20  224.74
   2 -10  -8 1381.67  477.16
  -2 -10   8 1822.77  285.95
   2 -10  -7   86.02  152.57
  -2 -10   7  158.98  219.32
   2 -10  -7  167.26  165.49
  -2 -10   7  502.10  423.75
   2 -10  -635090.90 1920.35
  -2 -10   631762.75 1689.59
   2 -10  -631980.61 1830.22
  -2 -10   634852.86 2015.10
   2 -10  -5 7765.50  545.85
  -2 -10   5 9621.12  608.28
   2 -10  -5 9571.50 1548.95
  -2 -10   510622.89  962.62
   2 -10  -4 4622.60  307.39
  -2  10   4 4364.41  180.38
  -2 -10   4 4467.33  443.06
   2 -10  -4 4905.14  575.98
  -2 -10   4 4691.05  498.92
  -2 -10   3  793.64  185.41
   2 -10  -3  831.17  275.72
  -2  10   3  764.20  138.91
  -2 -10   3 1267.00  350.15
   2 -10  -3 1366.04  637.89
  -2 -10   3 1656.94  478.71
  -2 -10   211199.36  650.07
   2 -10  -212661.04  813.48
  -2 -10   212355.43  788.04
  -2  10   210834.38  634.75
   2 -10  -212477.84 1230.20
  -2 -10   211602.02 1011.67
  -2 -10   1 2457.17   98.82
   2 -10  -1 2957.89  506.51
  -2 -10   1 2633.15  145.71
  -2  10   1 2432.45  157.89
   2 -10  -1 3172.77  504.85
  -2 -10   1 3117.32  959.28
   2 -10   0 7189.61  319.10
   2 -10   0 6122.47  895.45
  -2 -10   0 8133.62 1417.70
   2 -10   1 1812.23  401.96
   2 -10   1 1390.34  645.72
  -2 -10  -1 1987.76  725.18
   2 -10   210659.56  757.53
   2 -10   211035.42 1167.91
  -2 -10  -211480.15  810.47
   2 -10   3  103.22  148.12
   2 -10   3  260.24  600.59
  -2 -10  -3  267.94  144.10
   2 -10   417794.08 1038.67
  -2 -10  -418451.68 1135.89
   2 -10   417311.15 1310.88
   2 -10   5 4376.95  500.19
  -2 -10  -5 4491.50 1015.89
   2 -10   5 5481.18  424.60
   2 -10   6 8368.96  633.97
   2  10   6 7944.28  474.64
  -2 -10  -6 7649.45  766.50
   2 -10   610253.18 1412.46
   2 -10   7 6469.38  755.84
   2  10   7 5688.10  417.63
  -2 -10  -7 5238.32 1044.60
   2 -10   7 6158.59  556.39
   2 -10   8 5455.48  835.09
  -2 -10  -8 5629.31  388.44
   2 -10   8 5026.37  594.28
   2 -10   9  884.14  407.80
  -2 -10  -9  198.80  188.75
   2 -10   9  213.61  214.85
   2 -10  1011586.09 1239.34
  -2 -10 -1011503.03  762.12
   2 -10  1010291.93 1467.46
   2 -10  11  868.28  246.90
   2 -10  11  387.88  313.76
   2 -10  12 1811.79  568.42
   2 -10  12 1745.69  742.97
   2 -10  13  891.52  278.90
   2 -10  13   77.46  151.57
   2 -10  14 5005.42 1814.66
   2 -10  14 5228.68  391.60
   2 -10  15 2789.71 1253.64
   2 -10  16 2262.55  795.64
  -2 -11  17  121.68  335.47
  -2 -11  16 1338.66  780.68
  -2 -11  16 1162.32  600.27
  -2 -11  15  711.80  495.28
  -2 -11  15 1309.59  332.62
  -2 -11  14  994.05  466.53
  -2 -11  14 1008.18  374.62
  -2 -11  13  153.69  193.61
  -2 -11  13  358.02  281.00
  -2 -11  1212848.62 1024.34
  -2 -11  12 9924.75 1273.22
  -2  11  1212238.06 1029.14
  -2 -11  11 1005.66  361.34
  -2 -11  11  432.67  182.33
  -2  11  11 1348.74  311.41
  -2 -11  10 7175.06  918.88
  -2  11  10 6448.89  314.49
   2 -11 -10 6681.66  856.86
  -2 -11  10 5742.21 1156.41
  -2 -11   9 1447.96  390.68
  -2  11   9 1015.80  353.30
   2 -11  -9 1063.68  516.41
  -2 -11   9 1589.10  624.80
   2 -11  -8 5253.88  630.57
  -2 -11   8 4796.20  345.78
   2 -11  -8 4288.84  870.09
  -2 -11   8 5783.68  558.99
   2 -11  -7  946.19  335.48
  -2 -11   7 1236.29  553.86
   2 -11  -7 1612.88  445.76
  -2 -11   7 1619.69 1129.19
   2 -11  -6 1826.47  582.96
  -2 -11   6 2152.74  655.50
   2 -11  -6 1359.59  542.65
  -2 -11   6 2307.79  621.09
   2 -11  -5 4899.45  347.18
  -2 -11   5 5482.42  613.47
   2 -11  -5 4867.70 1239.54
  -2 -11   5 6435.69 1214.60
   2 -11  -412266.26  347.48
  -2 -11   411130.49  875.23
   2 -11  -412473.80  979.74
   2 -11  -315206.50  826.94
  -2 -11   314620.45  802.29
   2 -11  -315735.16 1321.96
  -2 -11   2 1884.55  112.32
   2 -11  -2 2323.51  369.52
  -2 -11   2 2562.28  137.59
   2 -11  -2 2011.84  602.73
  -2 -11   2 3240.70  896.29
   2 -11  -1 2582.07  354.40
   2 -11  -1 2982.97  985.97
  -2 -11   1 2732.52  730.25
   2 -11   0 4577.07  248.28
  -2 -11   0 5731.52 1017.92
   2 -11   1 2369.28  310.61
   2 -11   1 1855.06  781.24
  -2 -11  -1 2551.20  963.14
   2 -11   2 4150.63  283.68
   2 -11   2 5925.06 1572.55
  -2 -11  -2 5237.28  553.16
   2 -11   3  534.24  261.57
   2 -11   3 1032.75  393.74
  -2 -11  -3 1034.67  682.43
   2 -11   413841.95  848.62
  -2 -11  -414866.08 1026.02
   2 -11   414289.13  969.49
   2 -11   5 2734.92  814.08
  -2 -11  -5 3095.44  823.19
   2 -11   5 4154.14 1284.35
   2 -11   6 2359.71  567.63
  -2 -11  -6 2264.55  522.57
   2 -11   6 2573.62 1034.05
   2 -11   7  101.23  182.85
  -2 -11  -7  259.99  229.75
   2 -11   7  612.93  467.68
   2 -11   812326.03  940.56
  -2 -11  -812270.38  857.15
   2 -11   812947.52 1403.58
   2 -11   9 2700.68  902.05
  -2 -11  -9 1580.40  504.60
   2 -11   9 3341.33  920.94
   2 -11  10 4571.24 1341.75
  -2 -11 -10 3590.83  607.74
   2 -11  10 3491.04 1250.37
   2 -11  11  420.11  316.20
   2 -11  11  829.71  640.70
   2 -11  12 3710.84  785.95
   2 -11  12 2386.82  945.20
   2 -11  13 3989.75 1451.42
   2 -11  13 4251.34  575.63
   2 -11  14 2320.47  837.72
   2 -11  14  325.23  383.58
   2 -11  15  468.29  426.40
   2 -11  16 1839.49 1537.24
  -2 -12  17 2873.96  833.88
  -2 -12  16  474.71  265.19
  -2 -12  16   87.88  387.11
  -2 -12  15  992.72  669.17
  -2 -12  15  403.48  360.72
  -2 -12  14  324.03  333.59
  -2 -12  14  385.56  393.09
  -2 -12  1310944.57 1043.28
  -2 -12  13 8816.07 1102.63
  -2 -12  12  319.12  351.81
  -2 -12  12    9.80  175.52
  -2  12  12  282.76  172.92
  -2 -12  11 2619.20  879.09
  -2 -12  11 2920.89  756.73
  -2  12  11 2232.77  635.71
  -2 -12  10   90.32  228.47
   2 -12 -10  635.07  519.60
  -2 -12  10  217.93  318.48
  -2 -12   919939.06 1846.66
   2 -12  -918844.57 1701.22
  -2 -12   919595.78 1776.58
  -2 -12   8  845.79  316.53
   2 -12  -8 1417.14  471.19
  -2 -12   8  185.48  351.58
   2 -12  -7 4988.67  316.63
  -2 -12   7 5161.23  300.53
   2 -12  -7 7019.87  819.69
  -2 -12   7 4259.42  515.34
   2 -12  -6 1299.78  405.00
  -2 -12   6 1435.98  456.07
   2 -12  -6 2863.95  681.46
  -2 -12   6 1853.03  396.25
   2 -12  -523304.37 1226.00
  -2 -12   521839.64 1143.64
   2 -12  -519443.44 1411.62
  -2 -12   520468.74 1391.95
   2 -12  -4  262.30  148.07
  -2 -12   4   93.15   94.80
   2 -12  -4  213.74  311.99
  -2 -12   4  714.13  689.86
   2 -12  -3  429.87  150.08
  -2 -12   3  523.29  149.96
   2 -12  -3  871.05  455.44
   2 -12  -2  965.66  271.14
  -2 -12   2  967.26  142.63
   2 -12  -2 1692.92  664.63
  -2 -12   2 1284.56  358.84
   2 -12  -1 8124.22  534.75
   2 -12  -1 8720.17 1404.34
  -2 -12   1 9528.08  777.08
   2 -12   0   79.09  107.73
  -2 -12   0  234.40  297.25
   2 -12   1 1649.03  451.63
   2 -12   1 1911.53  492.94
  -2 -12  -1 1481.42  466.15
   2 -12   2 1493.44  458.78
   2 -12   2 2552.72  786.63
  -2 -12  -2 1419.46  935.60
   2 -12   323045.78 1242.56
  -2 -12  -324818.77 1455.04
   2 -12   326147.51 1616.92
   2 -12   4  306.87  311.23
  -2 -12  -4  365.40  296.25
   2 -12   4  735.56  674.61
   2 -12   5 4244.41  389.04
  -2 -12  -5 4556.70 1144.36
   2 -12   5 5239.20  664.80
   2 -12   6 2303.67  786.34
  -2 -12  -6 2325.43  557.53
   2 -12   6 2746.31  751.62
   2 -12   726168.01 1595.10
  -2 -12  -723991.91 1641.60
   2 -12   728601.63 1841.34
   2 -12   8  683.95  414.30
  -2 -12  -8  902.87  172.39
   2 -12   8  553.18  255.63
   2 -12   9   40.20  215.45
  -2 -12  -9  239.72  220.62
   2 -12   9  190.88  338.05
   2 -12  10  829.03  595.74
   2 -12  10  596.68  541.28
   2 -12  11 6659.63  684.84
   2 -12  11 4987.38  870.03
   2 -12  12 1004.46  567.05
   2 -12  12 1127.19  397.35
   2 -12  13  346.48  272.83
   2 -12  13   94.82  286.07
   2 -12  14  438.67  437.92
   2 -12  14  359.82  210.50
   2 -12  15 2449.20  542.47
  -2 -13  16  785.42  551.49
  -2 -13  16  862.77  639.10
  -2 -13  15  359.19  557.47
  -2 -13  15 1435.21  710.84
  -2 -13  14  540.12  234.01
  -2 -13  14  516.32  388.81
  -2 -13  13  110.52  178.70
  -2 -13  13   16.98  233.13
  -2 -13  12 2272.40 1016.25
  -2 -13  12 3996.58 1041.13
  -2 -13  11 5466.36  897.88
  -2 -13  11 4789.79  837.44
  -2 -13  10 1102.21  460.89
   2 -13 -10 1178.19  469.73
  -2 -13  10  257.58  189.00
  -2 -13   9  349.99  161.65
   2 -13  -9  324.00  279.88
  -2 -13   9  300.24  413.86
  -2 -13   8 1859.90  187.79
   2 -13  -8 2510.24 1068.64
  -2 -13   8 1639.95  612.23
  -2 -13   7 6127.69  371.15
   2 -13  -7 5335.53  763.33
  -2 -13   7 6125.70  681.88
  -2 -13   6 7548.03  348.38
   2 -13  -6 7160.51 1774.86
  -2 -13   6 7874.06 1423.82
   2 -13  -5  349.35  231.72
  -2 -13   5 -124.08  268.92
   2 -13  -4 1189.97  469.05
  -2 -13   4 1301.11  326.42
   2 -13  -311684.07 1529.10
  -2 -13   3 9060.35 1625.88
   2 -13  -2 2506.42  376.77
   2 -13  -2 2247.96  850.74
  -2 -13   2 2370.72  548.72
   2 -13  -1 1406.81  158.00
   2 -13  -1 1741.03  531.60
  -2 -13   1 2328.35  637.88
   2 -13   010069.50  719.79
  -2 -13   012254.48  899.02
   2 -13   1 9098.45  647.59
   2 -13   1 9210.22  792.40
  -2 -13  -1 9651.56 1038.94
   2 -13   2  522.19  255.81
   2 -13   2  645.54  270.70
  -2 -13  -2  983.67  651.55
   2 -13   3  835.44  213.46
   2 -13   3  613.51  170.33
  -2 -13  -3  548.90  462.48
   2 -13   4 2178.56  596.74
  -2 -13  -4 1134.65  685.63
   2 -13   4 3212.72 1145.12
   2 -13   5 6460.66  329.85
  -2 -13  -5 7167.32  478.10
   2 -13   5 7335.29  728.94
   2 -13   6 1665.66  541.84
  -2 -13  -6 2452.81  657.76
   2 -13   6 2491.82 1576.66
   2 -13   7  481.39  383.60
  -2 -13  -7  770.41  507.02
   2 -13   7  749.44  201.50
   2 -13   8 4531.39  707.60
  -2 -13  -8 5306.31 1414.40
   2 -13   9 9485.98  997.09
  -2 -13  -9 7241.18 1128.30
   2 -13   9 8956.05  981.48
   2 -13  10  554.82  326.18
   2 -13  10  563.22  381.23
   2 -13  11  788.04  479.92
   2 -13  11  770.07  615.80
   2 -13  12 3705.74  915.67
   2 -13  12 4223.73 1187.92
   2 -13  13  870.21  344.08
   2 -13  13 1400.83  668.62
   2 -13  14 1569.85  772.42
   2 -13  14 2557.37  737.37
  -2 -14  15  195.19  286.79
  -2 -14  14 1972.38  648.34
  -2 -14  13  335.76  545.08
  -2 -14  12  230.27  376.83
  -2 -14  11  528.57  822.09
   2 -14 -10 6110.41 1138.35
  -2 -14  10 5007.83 1627.90
   2 -14  -9  344.42  309.73
  -2 -14   9  426.03  378.32
   2 -14  -8 2824.16  953.87
  -2 -14   8 2777.57 1276.06
   2 -14  -7 2095.62  531.04
  -2 -14   7 1466.64  870.40
   2 -14  -6 4636.09 1411.31
  -2 -14   6 4419.46 1106.87
   2 -14  -5  852.31  189.78
  -2 -14   5  738.40  564.94
   2 -14  -4 1851.85 1012.17
  -2 -14   4 2749.57  447.91
   2 -14  -3  504.19  369.82
  -2 -14   3  407.67  449.73
   2 -14  -211780.93 1333.29
  -2 -14   211867.41  936.95
   2 -14  -1  924.43  484.18
  -2 -14   1  692.69  404.25
   2 -14   0 6365.34  536.93
  -2 -14   0 6375.24  552.51
   2 -14   1 1825.26  543.74
  -2 -14  -1 1060.43  762.33
   2 -14   2 9158.79 1135.99
  -2 -14  -211649.29 2154.13
   2 -14   3  170.31  188.34
  -2 -14  -3  561.84  461.48
   2 -14   3  162.24  283.30
   2 -14   4 2348.86  687.82
  -2 -14  -4 4003.03 1066.11
   2 -14   4 3736.69  854.72
   2 -14   5   51.57  181.36
  -2 -14  -5  495.83  422.08
   2 -14   5  444.12  264.65
   2 -14   6 8859.18  481.92
  -2 -14  -6 9192.07  726.46
   2 -14   7  147.50  233.22
  -2 -14  -7  506.50  464.77
   2 -14   7  350.67  333.70
   2 -14   8  673.18  623.95
  -2 -14  -8 2036.63  592.52
   2 -14   8 1667.51  746.51
   2 -14   9   -6.86  192.98
  -2 -14  -9  364.96  255.36
   2 -14   9  542.86  193.90
   2 -14  10 1768.23 1101.39
   2 -14  10 3622.84 1124.59
   2 -14  11  213.63  201.32
   2 -14  11  540.15  248.87
   2 -14  12 1996.54  772.59
   2 -14  12 3310.68  878.17
   2 -14  13  458.20  781.98
   2 -14  13 1599.87  553.39
   2 -14  14 4229.31 2096.37
   2 -14  14 5038.11 1109.55
  -2 -15  13  168.93  451.86
  -2 -15  12 1213.32  600.84
   2 -15 -11  960.89  576.57
  -2 -15  11 2356.96 1001.70
   2 -15 -10 2091.10  694.92
  -2 -15  10  820.87  457.06
   2 -15  -9 2104.63  638.87
  -2 -15   9 2413.16  932.02
   2 -15  -8 1582.13  583.67
  -2 -15   8 1594.14  922.82
   2 -15  -7 5711.99 1412.61
  -2 -15   7 6526.71 1109.05
   2 -15  -6  233.61  345.58
  -2 -15   6  417.74  227.23
   2 -15  -5  966.64  366.45
  -2 -15   5  213.85  324.36
   2 -15  -4 4837.45 1227.63
   2 -15  -3 9554.61  762.52
  -2 -15   3 9607.79  691.61
   2 -15  -2 4838.29  637.14
  -2 -15   2 3587.52 1299.64
   2 -15  -1 1958.49  821.18
  -2 -15   1  434.63  452.55
   2 -15   0 6243.12 1192.15
  -2 -15   0 5817.81  891.08
  -2 -15  -118388.11 1113.75
  -2 -15  -2  392.03  281.55
   2 -15   2  164.58  378.42
  -2 -15  -3  405.32  275.16
   2 -15   3  471.89  363.66
  -2 -15  -4 1733.36  593.16
   2 -15   4 1806.82  476.26
  -2 -15  -5 3380.65  955.03
   2 -15   5 2854.06  966.92
  -2 -15  -6  705.47  598.99
   2 -15   6  571.33  606.03
  -2 -15  -7  847.26  420.21
   2 -15   7  836.53  497.91
  -2 -15  -8   62.14  150.73
   2 -15   8  528.74  290.03
   2 -15   9 7758.83 1399.87
   2 -15  10  347.23  162.78
   2 -15  11  499.00  286.47
   2 -15  12 1864.62  688.85
   2 -15  13 4249.80 1023.13
  -2 -16  11  587.65  278.33
   2 -16 -10  195.85  222.15
  -2 -16  10  498.26  664.71
   2 -16  -9 3304.69 1208.75
  -2 -16   9 3884.01  449.36
   2 -16  -8  121.54  265.01
  -2 -16   8 1049.84  361.40
   2 -16  -7  799.89  590.91
  -2 -16   7  593.10  225.86
   2 -16  -6 1481.30  730.93
  -2 -16   6  795.45  641.17
   2 -16  -5 7655.20 1038.58
  -2 -16   5 8370.48 1047.60
   2 -16  -4  573.61  221.15
   2 -16  -3  607.44  393.55
  -2 -16   3  267.71  430.24
   2 -16  -2 4075.67  789.04
  -2 -16   2 4279.63 1013.50
   2 -16  -110987.79 1228.34
  -2 -16   111438.67 1274.21
   2 -16   0 1475.52  573.41
  -2 -16   0 1310.46  587.08
  -2 -16  -1 3235.55 1264.29
   2 -16   2 2111.98  589.50
  -2 -16  -2  613.73  527.10
  -2 -16  -310828.34 1654.40
   2 -16   311503.44 1147.78
  -2 -16  -4  712.44  338.89
   2 -16   4 1223.39  532.26
  -2 -16  -5  574.27  273.23
   2 -16   5  825.67  370.85
  -2 -16  -6  926.32  455.72
   2 -16   6 1028.57  454.97
  -2 -16  -7 6739.16 1268.28
   2 -16   711702.27 2138.09
  -2 -16  -8  897.49  328.89
   2 -16   8  -74.79  162.47
   2 -16   9  744.19  429.44
   2 -16  10 1419.86  623.54
   2 -17 -10  289.74  344.75
   2 -17  -9  589.03  233.16
   2 -17  -8 2989.62 1366.48
  -2 -17   8 2389.57 1390.62
   2 -17  -7 1767.19  720.62
  -2 -17   7  912.83  681.03
   2 -17  -6 1600.96  613.29
  -2 -17   6 1485.25  844.11
   2 -17  -5  461.60  245.25
  -2 -17   5  562.30  398.40
   2 -17  -4 9183.98 1150.67
  -2 -17   4 9897.15 1805.77
   2 -17  -3  310.70  156.54
  -2 -17   3  486.86  363.62
   2 -17  -2 1437.09  559.52
  -2 -17   2  923.07  813.32
   2 -17  -1  334.12  217.64
  -2 -17   1  233.53  579.60
   2 -17   0 4976.62 1416.18
  -2 -17   0 5370.59 1292.82
   2 -17   1 2560.22 1153.92
  -2 -17  -1 2359.87  790.87
   2 -17   2 3272.46  809.79
  -2 -17  -2 5426.37 1150.58
  -2 -17  -3 1938.10  528.91
   2 -17   3 4772.73 1332.41
   2 -17   4 5338.14  696.91
  -2 -17  -4 5684.59 1191.46
  -2 -17  -5  228.48  289.71
   2 -17   5  805.30  417.08
  -2 -17  -6 5106.08 1174.23
   2 -17   6 4061.10 1215.53
  -2 -17  -7  354.84  287.44
   2 -17   7  469.46  274.03
   2 -18  -8 2859.01 1124.73
   2 -18  -7  748.90  462.44
   2 -18  -6 1640.62  656.44
   2 -18  -5  538.93  594.79
  -2 -18   5  573.69  520.94
   2 -18  -4  615.67  595.96
  -2 -18   4  226.96  415.94
   2 -18  -3 1193.41  523.38
  -2 -18   3 2273.46 1133.76
   2 -18  -2 2743.71  903.50
  -2 -18   2 2747.79 1107.05
   2 -18  -1  735.88  453.34
  -2 -18   1 1087.18  512.92
   2 -18   0 1975.63 1072.97
  -2 -18   0 2600.51  881.05
   2 -18   1  388.23  288.34
  -2 -18  -1  640.06  365.89
  -2 -18  -2 6814.50 1589.84
   2 -18   2 5595.55 1759.33
  -2 -18  -3 2086.23  658.21
   2 -18   3 1221.87  599.51
  -2 -18  -4 2099.31  674.99
   2 -18   4 2239.75  519.74
  -2 -18  -5  454.81  392.46
  -2 -18  -6 1112.70  500.36
  -2 -19  -2 1370.79  321.87
  -2 -19  -3  317.65  269.92
  -2 -19  -4  255.52  278.66
  -2 -19  -5 3491.91 1337.00
  -3   0  20  388.91  173.46
  -3   0  19 6397.05  926.61
  -3   0  18  707.55  385.38
  -3   0  17 7562.11  956.77
  -3   0  16  347.26  113.98
  -3   0  16  120.65  121.56
  -3   0  15 1113.35  498.24
  -3   0  15 2451.60  370.67
  -3   0  14   48.67  201.43
  -3   0  14  258.84  160.59
  -3   0  13 1994.25  517.88
  -3   0  13 1398.69  563.63
  -3   0  12  107.89  186.14
  -3   0  12  344.45  274.55
  -3   0  11 8278.52 1083.03
  -3   0  11 7713.96  664.38
  -3   0  10   -7.50  213.19
  -3   0  10  168.52   67.29
  -3   0   9 2987.94  328.28
  -3   0   9 3850.22  457.13
   3   0  -8  -33.00  201.91
  -3   0   8  422.37  140.25
   3   0  -7 8958.64  420.19
  -3   0   7 9621.99  649.78
   3   0  -6 -187.42  227.17
  -3   0   6  366.09  179.29
   3   0  -6  153.03  100.10
   3   0  -515546.16  961.21
  -3   0   512680.06  947.64
  -3   0   516040.50  873.85
   3   0  -515793.06  845.69
   3   0  -4  -33.48  184.59
  -3   0   4  123.92  131.73
  -3   0   4   75.88  154.56
   3   0  -4   25.50   74.57
   3   0  -3 1505.55  245.96
  -3   0   3 1860.84  515.18
  -3   0   3 1740.55  236.72
   3   0  -3 2002.85  490.15
   3   0  -2  -50.82  159.79
  -3   0   2   78.69  180.02
  -3   0   2  163.43  115.57
   3   0  -2  171.21   84.96
   3   0   0  237.08  114.75
  -3   0   0  166.67  173.28
  -3   0   0  102.11  101.28
   3   0   0   55.37  137.73
   3   0   2  -97.88  162.75
  -3   0  -2   35.85  159.97
  -3   0  -2   52.46   51.95
   3   0   361805.00 1520.48
  -3   0  -366266.52 1558.91
  -3   0  -367778.68 1498.21
   3   0   4  254.66  288.36
  -3   0  -4  191.53   48.64
  -3   0  -4   32.53   72.61
  -3   0  -4   53.01   42.98
   3   0   520418.65 1145.11
  -3   0  -517649.79  909.88
  -3   0  -520415.40 1041.49
   3   0   6  225.26  230.88
   3   0   7 2453.96  617.28
   3   0   8  504.97  249.15
   3   0   915334.36  577.62
   3   0  10  345.73  278.63
   3   0  1124596.45 1471.78
   3   0  12  462.23  379.74
   3   0  13 8829.12  690.93
   3   0  14  885.11  327.46
   3   0  1516573.19 1212.70
   3   0  16  424.61  138.96
   3   0  17  779.17  510.11
   3   0  18  266.28  346.77
   3   0  19 5044.63 1384.10
  -3  -1  20 2290.66 1118.36
  -3   1  20 3861.80  962.34
  -3  -1  19 1601.65  356.47
  -3   1  19 1730.29  313.23
  -3  -1  18  590.74  248.41
  -3   1  18   50.66  275.29
  -3  -1  17 1234.81  664.19
  -3   1  17 1009.14  206.31
  -3  -1  1610368.70 1611.58
  -3   1  1610176.45 1378.11
  -3  -1  1611368.19 1183.00
  -3   1  1610989.98 1447.07
  -3  -1  15 6586.19  639.25
  -3   1  15 9304.33 1087.28
  -3  -1  15 7679.20  887.89
  -3   1  15 7715.09  477.09
  -3  -1  14  129.80  290.05
  -3   1  14  299.67  171.39
  -3  -1  14  305.23  198.37
  -3   1  14  572.81  275.55
  -3  -1  1315534.51 1162.31
  -3   1  1313776.19  925.79
  -3  -1  1315958.94 1041.13
  -3   1  1315171.42 1046.44
  -3  -1  12 3316.37  755.82
  -3   1  12 3328.22  338.33
  -3  -1  12 2950.45  421.82
  -3   1  12 3329.00  396.27
  -3  -1  11  111.59  178.76
  -3   1  11 1204.79  350.05
  -3  -1  11  468.09  253.60
  -3   1  11  552.45  421.07
  -3  -1  10  339.70  252.30
  -3   1  10  419.39  389.90
  -3  -1  10  258.68  191.39
  -3   1  10  188.44  123.23
  -3  -1   9 7215.23  711.33
  -3  -1   9 9210.15  647.52
  -3   1   9 7903.54  745.83
  -3  -1   816659.49 1011.18
  -3  -1   812754.68  782.28
  -3   1   812733.05  799.70
   3   1  -752225.16 1727.87
  -3  -1   749323.81 1618.15
  -3   1   747453.98 1569.17
   3   1  -6 3109.37  651.97
   3  -1  -6 3143.93  490.83
  -3  -1   6 2331.92  331.26
   3   1  -6 3070.02  326.09
  -3   1   6 2536.60  270.12
   3  -1  -6 2467.17  222.96
   3   1  -525300.16  829.17
   3  -1  -524865.05 1041.32
  -3  -1   525430.37  790.38
  -3   1   526179.67  740.18
  -3  -1   524616.29  957.94
   3   1  -523325.50  669.36
  -3   1   522798.78  658.99
   3  -1  -522082.00  634.27
   3   1  -418683.91  640.04
   3  -1  -419097.40  615.18
  -3  -1   419312.09  560.11
  -3   1   417463.81  539.51
  -3  -1   418663.19  645.12
   3   1  -417908.96  587.94
  -3   1   416885.97  502.10
   3  -1  -417806.34  521.71
   3   1  -3 3381.84  296.16
  -3  -1   3 3894.49  351.88
   3  -1  -3 3945.07  530.83
  -3   1   3 3851.55  305.33
  -3  -1   3 3969.25  368.42
   3   1  -3 3881.68  297.95
  -3   1   3 3098.00  248.17
   3  -1  -3 3779.23  278.45
   3   1  -212116.38  659.87
  -3  -1   212584.02  729.01
   3  -1  -2 9899.97  572.88
  -3   1   212961.40  705.74
  -3  -1   211909.32  658.78
   3   1  -212647.56  690.92
  -3   1   211105.24  769.34
   3  -1  -210859.22  599.94
   3   1  -112083.99  662.80
   3  -1  -112785.92  716.50
  -3  -1   111631.35  661.67
  -3   1   111251.11  687.84
  -3  -1   111284.38  622.11
   3   1  -110841.04  599.99
  -3   1   110954.50  636.92
   3  -1  -112784.63  700.34
   3   1   084372.18 1888.16
  -3   1   083229.07 1894.28
   3  -1   1  172.61   91.39
   3   1   1  255.42  121.36
  -3  -1  -1  129.43  122.94
  -3   1  -1  171.89  238.66
  -3   1  -1  -69.43  113.36
  -3  -1  -1   67.44   77.51
   3   1   1  -23.64   94.49
   3  -1   216313.53  533.64
   3   1   216778.88  495.13
  -3  -1  -215214.13  836.07
  -3   1  -215590.74  831.37
   3  -1   217323.02  468.46
  -3   1  -216353.66  445.35
  -3  -1  -216232.36  307.63
   3   1   216597.08  419.72
   3   1   345331.07 1108.12
   3  -1   341825.30 1131.10
  -3   1  -341701.40 1037.61
  -3  -1  -341397.23 1002.52
   3  -1   344425.15 1043.24
  -3  -1  -347125.20 1053.46
   3   1   346697.11 1046.98
   3  -1   4 7319.28  994.60
   3   1   4 5774.38  468.57
  -3   1  -4 5514.12  365.80
  -3  -1  -4 5433.90  348.03
   3  -1   4 5837.95  425.26
   3  -1   521350.65 1197.19
   3   1   520396.07 1200.48
   3  -1   520905.08 1107.82
   3   1   6 4942.07  586.48
   3  -1   6 6440.12 1060.71
   3  -1   6 4626.88  400.04
  -3   1  -6 4821.45  399.00
   3  -1   715877.40  948.37
   3   1   712564.44  753.35
   3  -1   715716.03  860.46
  -3   1  -714738.83  782.33
   3  -1   825909.16 1115.55
   3   1   826626.63 1079.21
   3  -1   826320.48  929.22
  -3   1  -825230.89  890.38
   3  -1   9 7557.00 1058.94
   3   1   9 5478.36  467.15
   3  -1   9 6065.16  397.39
  -3   1  -9 5968.85  379.15
   3  -1  10  264.86  189.84
   3   1  10  452.04  269.80
   3  -1  10   -8.62   40.28
  -3   1 -10    5.62   27.46
   3  -1  11 3298.04  611.64
   3   1  11 3272.04  394.98
   3  -1  11 2410.22  260.87
  -3   1 -11 2480.85  114.31
   3  -1  12 8618.80  710.99
   3   1  12 9786.37  806.88
   3  -1  13 4202.14 1223.80
   3   1  13 5299.71  501.83
   3  -1  14  283.31  245.74
   3   1  14 1600.70  339.21
   3  -1  15 2110.73  843.49
   3   1  15 2771.27  752.59
   3  -1  16 6598.59 1774.35
   3   1  16 7948.03  997.11
   3  -1  17  620.80  372.09
   3   1  17  526.89  235.94
   3  -1  18  451.79  456.94
   3   1  18  596.64  581.38
   3  -1  19  620.94  643.98
   3   1  19  637.56  477.97
  -3  -2  20  524.30  319.10
  -3   2  20  423.86  207.19
  -3  -2  19  648.77  604.70
  -3   2  19  260.97  301.94
  -3  -2  1813278.79 1705.12
  -3   2  1810118.82 1250.70
  -3  -2  17  230.55  141.19
  -3   2  17  651.15  317.86
  -3  -2  16   68.31  244.65
  -3   2  16  447.29  417.47
  -3  -2  16  188.71  170.95
  -3   2  16   87.89  191.25
  -3  -2  15  517.66  153.72
  -3   2  15 1411.86  402.18
  -3  -2  15  894.74  209.81
  -3   2  15  776.46  307.61
  -3  -2  1421641.43 1603.86
  -3   2  1422650.65 1650.02
  -3  -2  1420565.74 1266.15
  -3   2  1423398.88 1264.96
  -3  -2  13 2104.53  425.84
  -3   2  13 2094.08  509.87
  -3  -2  13 1917.74  454.38
  -3   2  13 1682.81  243.24
  -3   2  12 1203.20  355.23
  -3  -2  12  924.74  244.40
  -3   2  12  640.26  215.38
  -3  -2  11  184.62  213.11
  -3   2  11  145.46  315.64
  -3  -2  11  161.87  115.14
  -3   2  11  208.64  236.02
  -3   2  1039675.76 1714.42
  -3  -2  1040220.14 1722.72
  -3   2  1040209.63 1804.26
   3  -2  -9 2952.80  343.14
  -3  -2   9 4245.46  492.50
  -3  -2   9 3460.13  452.10
  -3   2   9 3623.93  391.46
   3  -2  -8 7229.51 1045.45
  -3  -2   8 6995.03  532.49
  -3  -2   8 7464.27  622.20
  -3   2   8 7853.28  592.93
   3  -2  -7 8863.34  389.31
  -3  -2   7 9942.44  728.86
  -3  -2   7 8287.09  684.67
  -3   2   7 8075.13  599.10
   3   2  -652467.45 2011.06
  -3  -2   651450.98 1655.97
  -3   2   652992.69 1666.16
   3  -2  -650314.13 1579.05
   3   2  -5 6592.03  546.43
   3  -2  -5 6589.13  525.82
  -3  -2   5 5722.09  443.40
  -3   2   5 5769.73  448.16
  -3  -2   5 6340.63  555.41
   3   2  -5 7286.23  540.42
  -3   2   5 6308.89  663.71
   3  -2  -5 6225.56  466.85
   3   2  -4 3248.04  327.99
  -3  -2   4 2974.20  283.59
   3  -2  -4 3590.60  572.63
  -3   2   4 3056.60  253.61
  -3   2   4 3723.53  414.09
  -3  -2   4 3105.84  268.46
   3   2  -4 3347.79  279.34
  -3   2   4 3331.27  306.68
   3   2  -3 2449.18  652.89
  -3  -2   3 1920.43  213.82
   3  -2  -3 2883.39  754.94
  -3   2   3 1804.82  148.69
  -3   2   3 2615.33  296.22
  -3  -2   3 2865.91  486.74
   3   2  -3 1699.90  230.30
  -3   2   3 2113.75  245.90
   3   2  -261549.01 1452.99
  -3  -2   261145.16 1411.76
   3  -2  -256984.13 1481.85
  -3   2   262351.88 1462.67
  -3   2   262452.63 1561.01
  -3  -2   263434.85 1632.34
   3   2  -261121.94 1438.32
  -3   2   262107.93 1470.84
   3   2  -1 5490.94  331.56
  -3  -2   1 5497.58  341.14
   3  -2  -1 6456.07  499.30
  -3   2   1 6064.96  393.19
   3  -2  -1 5682.16  356.88
  -3   2   1 6319.84  405.92
  -3  -2   1 5444.25  531.27
   3   2  -1 5588.97  361.54
   3   2   0 7643.62  557.74
   3  -2   0 7924.50  749.17
  -3  -2   0 8009.19  439.35
  -3   2   0 7311.33  439.69
   3  -2   0 8675.27  529.45
  -3   2   0 7568.99  534.25
  -3  -2   0 9114.81  532.29
   3   2   0 9497.25  526.48
   3   2   1   77.76   70.90
   3  -2   1  140.65  127.46
  -3  -2  -1   -8.97  100.96
  -3   2  -1  173.37   83.99
   3  -2   1  154.75  156.31
  -3   2  -1  246.58  126.26
  -3  -2  -1 -123.49  120.84
   3   2   1  205.99  103.30
   3   2   2177164.8  923.68
  -3   2  -2170585.9 3781.26
  -3  -2  -2176667.4  796.93
   3  -2   2171592.6 3798.43
  -3   2  -2174452.7 3853.73
   3   2   332629.48  814.14
  -3   2  -334042.09 1091.81
  -3  -2  -333860.54  900.10
   3  -2   336572.78 1071.06
  -3   2  -335453.90  880.79
  -3  -2  -335639.57  833.60
   3   2   336183.62  829.67
   3  -2   415601.19 1099.78
   3   2   416141.90 1001.85
  -3  -2  -413367.96  739.70
   3  -2   414414.70  791.76
  -3  -2  -415521.63  812.43
  -3   2  -414079.30  766.96
   3   2   415142.54  777.80
   3  -2   5 2260.24  598.01
   3   2   5 1699.96  198.85
  -3  -2  -5 2160.20  297.95
   3  -2   5 1839.90  291.25
  -3   2  -5 2056.81  351.56
   3  -2   6 2530.80  609.36
   3   2   6 1721.00  220.14
   3  -2   6 1857.83  432.90
   3  -2   7 7811.43  597.10
   3   2   7 8623.53  639.94
   3  -2   7 9941.95  727.14
   3  -2   8 2002.08  684.63
   3   2   8 1418.02  265.71
   3  -2   8 1435.08  275.97
   3  -2   9 5759.73  777.75
   3   2   9 4925.95  673.09
   3  -2   9 5804.45  411.86
  -3   2  -9 6802.30  487.22
   3  -2  1024148.83 1440.56
   3   2  1025949.57 1947.07
   3  -2  1021735.93 1203.56
  -3   2 -1022061.54 1223.46
   3  -2  11 1379.81  366.06
   3   2  11 2544.69  886.25
   3  -2  11 2164.74  485.20
  -3   2 -11 1809.81  203.70
   3  -2  12 1644.66  417.88
   3   2  12 1162.48  661.49
   3  -2  12 1172.51  315.68
   3  -2  13  735.11  177.10
   3   2  13  366.45  429.10
   3  -2  14 7875.42 1123.80
   3   2  14 7934.73  889.24
   3  -2  15  152.41  411.36
   3   2  15  464.59  215.47
   3   2  16  549.26  347.41
   3  -2  16  137.86  282.46
   3  -2  17  159.39  215.46
   3   2  18 6836.96 1038.07
   3  -2  18 6878.45 1178.04
   3  -2  19  129.08  225.07
   3   2  19  416.60  520.23
  -3  -3  20  492.24  473.09
  -3   3  20  428.85  231.00
  -3  -3  19 1620.19  424.44
  -3   3  19  906.31  671.01
  -3  -3  18  669.44  434.16
  -3   3  18  359.35  349.09
  -3  -3  1711687.03 1034.05
  -3   3  17 9134.84 1120.81
  -3   3  16  200.68  231.60
  -3  -3  16   60.20  155.54
  -3   3  15 2280.88 1001.20
  -3  -3  15 2156.23  588.29
  -3   3  15 1751.70  416.14
  -3   3  14 1905.24  603.75
  -3  -3  14 1648.76  523.71
  -3   3  14 2359.71  374.01
  -3  -3  1312956.81 1131.50
  -3   3  1312862.34  598.83
  -3  -3  1312325.90  887.28
  -3   3  1314193.58  910.19
  -3  -3  12 5126.63  479.33
  -3   3  12 5715.57  462.77
  -3  -3  12 4830.87  471.16
  -3   3  12 5852.90  434.59
  -3  -3  1123805.41 1525.58
  -3   3  1124213.45 1538.61
  -3  -3  1124398.59 1447.10
  -3   3  1122752.06 1453.48
  -3  -3  10 1307.07  380.45
  -3  -3  10  819.21  181.39
  -3   3  10 1133.46  271.05
   3  -3  -932372.05 1388.28
  -3  -3   936553.57 1444.62
  -3  -3   931513.94 1510.59
  -3   3   936138.14 1442.49
   3  -3  -810125.18  730.18
  -3  -3   810252.12  784.45
  -3  -3   8 7985.57  603.08
  -3   3   8 9003.89  623.97
   3  -3  -736428.64 1314.64
  -3  -3   737753.34 1290.40
  -3  -3   736596.01 1276.30
  -3   3   736456.55 1178.38
   3  -3  -6  587.52  406.02
  -3  -3   6 1569.34  369.51
  -3  -3   6 2377.53  885.50
  -3   3   6 1251.74  373.71
   3   3  -573677.41 2293.56
  -3  -3   574062.39 2278.76
  -3   3   571607.60 2208.06
  -3   3   573590.83 2287.40
  -3  -3   576103.02 2389.58
  -3   3   572110.62 2246.23
   3   3  -4 1577.49  600.75
  -3  -3   4 2020.37  517.88
   3  -3  -4 1321.61  416.13
  -3   3   4 1759.85  407.94
  -3   3   4 1252.56  245.49
  -3  -3   4 1956.66  400.91
   3   3  -4 1616.26  455.03
  -3   3   4 2369.31  650.15
   3   3  -313127.05  716.75
  -3  -3   312862.46  696.56
   3  -3  -311923.90  696.60
  -3   3   314164.78  766.87
   3  -3  -314059.19  843.38
  -3   3   313526.41  780.79
  -3  -3   313972.14  800.43
   3   3  -313291.45  747.26
   3   3  -2  -46.61  108.49
  -3  -3   2  202.34   75.26
   3  -3  -2  108.99  114.53
  -3   3   2  -18.35  124.99
   3  -3  -2  331.13  142.86
  -3   3   2  196.95  148.49
  -3  -3   2  273.76   92.16
   3   3  -2  102.22   75.67
   3   3  -111118.73  595.96
  -3  -3   111045.86  642.69
   3  -3  -112151.89  735.95
  -3   3   112173.28  667.07
   3  -3  -112270.66  711.06
  -3   3   111798.66  707.93
  -3  -3   110769.00  631.25
   3   3  -110703.73  612.54
   3   3   0 3802.21  284.16
   3  -3   0 3906.50  309.38
  -3   3   0 3636.85  295.67
   3  -3   0 4063.26  351.38
  -3   3   0 3363.19  438.16
  -3  -3   0 3235.03  257.48
   3   3   0 4051.53  281.04
   3   3   117406.76  452.45
   3  -3   117571.46  523.22
  -3   3  -116888.51  574.63
   3  -3   117263.25  551.38
  -3  -3  -115697.83  836.43
   3   3   117264.83  492.51
   3   3   2 1928.60  180.23
   3  -3   2 2535.18  257.62
  -3   3  -2 2043.68  511.98
  -3  -3  -2 2090.19  123.73
   3  -3   2 1541.95  497.49
  -3   3  -2 1938.18  412.18
  -3  -3  -2 1795.06  172.08
   3   3   2 1947.64  223.13
   3  -3   339079.43 1272.62
   3   3   338800.12 1282.63
  -3   3  -340044.98 1283.47
  -3  -3  -338008.08 1213.93
   3  -3   337159.08 1235.72
  -3   3  -337589.09 1206.79
  -3  -3  -341624.75 1288.35
   3   3   338606.47 1198.34
   3  -3   422806.17  846.92
   3   3   422576.90  789.95
  -3  -3  -420334.30 1073.84
   3  -3   421261.23 1342.77
  -3  -3  -418569.32 1003.28
  -3   3  -421191.48 1215.25
   3   3   421433.52 1112.70
   3  -3   522721.56  956.86
   3   3   523368.55  815.32
  -3  -3  -522303.41  847.27
  -3  -3  -523599.37  737.15
   3  -3   522859.19  852.54
  -3   3  -521692.35 1198.74
   3   3   520940.66 1078.38
   3  -3   6 4443.80  417.47
   3   3   6 4355.01  418.58
   3  -3   6 3932.76  576.84
  -3   3  -6 4423.15  355.11
   3   3   6 3955.71  261.03
   3  -3   713634.30  833.51
   3   3   713819.39  816.39
   3  -3   714108.00  874.87
  -3   3  -713204.28  768.38
   3  -3   8 4986.84  534.35
   3   3   8 6726.94  643.63
   3  -3   8 7719.19  778.53
  -3   3  -8 6833.55  833.16
   3  -3   929673.98 1362.03
   3   3   927360.53 1298.24
   3  -3   927127.50 1135.20
   3  -3  10  232.91  200.82
   3  -3  11 6435.92 1291.76
   3   3  11 6122.70  354.41
   3  -3  11 4615.27  429.17
   3  -3  12 3893.60 1003.58
   3   3  12 3340.91  693.52
   3  -3  12 3826.50  325.01
   3  -3  13 3148.80 1111.44
   3   3  13 1672.71  849.25
   3  -3  14  237.50  261.52
   3   3  14 1153.61  440.67
   3  -3  15  852.37  408.23
   3   3  15 1731.38  707.51
   3  -3  16  819.21  310.49
   3   3  16 1418.97  449.64
   3  -3  17 3474.89 1308.64
   3   3  17 2523.34 1210.87
   3  -3  18  998.39  606.59
   3   3  18  486.73  350.07
   3   3  19 3733.18 1110.45
  -3   4  20  386.14  198.84
  -3  -4  19 6689.49  814.80
  -3   4  19 5466.08 1190.17
  -3  -4  18 2032.31 1202.53
  -3   4  18 2431.82  860.52
  -3  -4  17 6253.75 1693.66
  -3   4  17 8068.34 1020.96
  -3  -4  17 6476.70  669.38
  -3  -4  16  900.93  379.54
  -3   4  16  167.30  224.25
  -3  -4  16   16.73  207.52
  -3  -4  15  843.24  342.88
  -3   4  15  724.31  406.95
  -3  -4  15  522.14  388.73
  -3   4  15  689.25  352.32
  -3  -4  14  214.48  335.90
  -3   4  14  450.43  260.46
  -3  -4  14  336.11  166.14
  -3   4  14  344.14  227.05
  -3  -4  13 3624.10  446.86
  -3   4  13 3320.58 1044.82
  -3  -4  13 4550.50  531.99
  -3   4  13 3438.49  302.57
  -3  -4  12  178.28  372.77
  -3   4  12  209.82  172.16
  -3  -4  12  504.80  305.52
  -3   4  12  342.19  118.71
  -3  -4  1116983.73 1098.01
  -3   4  1112122.85  830.54
  -3  -4  1114994.47 1151.45
  -3   4  1115048.66  971.00
   3  -4 -1027746.95 1257.10
  -3  -4  1031181.59 1481.50
  -3  -4  1029998.27 1357.70
  -3   4  1029196.46 1315.23
   3  -4  -9 9607.92  714.33
  -3  -4   910852.64  766.30
  -3  -4   912150.53  988.84
  -3   4   9 8985.58  634.69
   3  -4  -8  704.16  195.64
  -3  -4   8 1050.91  458.90
  -3  -4   8 1294.96  305.25
  -3   4   8 1196.12  268.88
   3  -4  -721032.72 1212.22
  -3  -4   720987.70 1174.82
  -3  -4   720410.28 1266.48
  -3   4   720791.81 1147.28
   3  -4  -6 1119.06  657.83
  -3  -4   6 1552.04  228.95
  -3  -4   6 2111.90  842.12
  -3   4   6 2185.82  532.21
  -3  -4   521090.61 1227.40
   3  -4  -523709.09  855.92
  -3  -4   521947.66 1188.53
  -3  -4   522216.06  572.87
  -3   4   521083.09 1164.62
  -3  -4   412643.22  711.61
   3  -4  -410092.51  784.83
  -3   4   4 9991.32  738.05
   3  -4  -4 9708.16  643.38
  -3  -4   410641.68  679.56
   3   4  -319008.51 1019.99
  -3  -4   316605.66  935.34
   3  -4  -317740.97 1033.06
  -3   4   317789.36  958.76
   3  -4  -317984.90 1155.20
  -3  -4   318352.48 1049.64
   3   4  -2 8183.21  461.71
  -3  -4   2 8083.18  446.78
   3  -4  -2 8187.58  508.52
  -3   4   2 8295.04  610.64
   3  -4  -2 8111.75  513.38
  -3   4   2 9557.03  573.40
  -3  -4   2 8008.09  513.71
   3   4  -2 7995.49  691.46
   3   4  -121738.59  623.28
   3  -4  -121038.53  630.07
  -3   4   120789.74  586.26
   3  -4  -121460.69  670.61
  -3   4   119870.52  633.20
   3   4  -120176.64  597.91
   3   4   0 1726.55  140.81
   3  -4   0 1961.31  526.21
  -3   4   0 1223.17  430.49
   3  -4   0 1801.53  477.21
  -3   4   0 1877.25  410.32
  -3  -4   0 1743.13  660.31
   3   4   0 2184.00  552.20
   3   4   1 4321.86  256.97
   3  -4   1 3895.86  308.15
  -3   4  -1 3588.77  268.50
   3  -4   1 4752.68  359.73
  -3   4  -1 3654.58  297.82
  -3  -4  -1 3488.61  313.37
   3   4   1 3615.05  265.06
   3   4   2  -78.45   66.08
   3  -4   2  259.84  237.33
  -3   4  -2  229.86  161.86
   3  -4   2  164.51  197.77
  -3   4  -2   -8.59  145.73
  -3  -4  -2  170.64   86.57
   3   4   2  192.57  169.33
   3  -4   310437.16  640.07
   3   4   311014.91  614.62
   3  -4   311283.13  690.34
  -3   4  -310544.25  636.08
  -3  -4  -310020.67  578.15
   3   4   312010.01  668.19
   3  -4   4  752.86  425.84
   3   4   4  822.96  216.65
  -3  -4  -4  794.83  190.05
   3  -4   4  497.13  282.36
  -3  -4  -4  256.69  178.13
  -3   4  -4  980.27  263.95
   3   4   4  832.45  184.84
   3  -4   519747.36 1119.51
   3   4   522915.07  582.17
  -3  -4  -521044.85 1115.00
  -3  -4  -522740.65 1270.59
   3  -4   521374.64 1361.71
  -3   4  -520349.04 1213.88
   3   4   519984.39 1061.38
   3  -4   618547.12 1104.75
   3   4   618653.65 1075.02
  -3  -4  -617586.43 1057.65
  -3  -4  -618731.18  986.34
   3  -4   619675.02 1510.85
  -3   4  -617698.57 1167.70
   3   4   616962.93  891.81
   3   4   715505.47  968.96
   3  -4   717807.99 1102.65
   3   4   715226.84  862.20
   3   4   8 4904.73  466.97
   3  -4   8 4553.59  615.55
   3   4   8 4455.94  259.85
   3   4   8 5032.62  290.65
   3   4   911860.67  911.47
   3  -4   910883.78  751.88
   3  -4  10 7317.39  695.69
   3   4  10 6485.29  573.59
   3  -4  10 6469.43  611.75
   3  -4  11 8671.73  737.94
   3   4  11 7566.99  602.00
   3  -4  11 7294.24  703.65
   3  -4  12  171.10  710.70
   3   4  12 1335.67  365.18
   3  -4  12 1197.90  391.37
   3  -4  13 2919.87  956.26
   3   4  13 2999.08  315.97
   3  -4  14 1584.65  565.44
   3   4  14 1478.88  464.24
   3  -4  15 6432.21  826.85
   3   4  15 5806.09  711.22
   3   4  16  156.27  146.72
   3  -4  17 2176.47  653.82
   3   4  17  858.05  594.35
   3  -4  18 2995.70 1283.89
   3   4  18 4165.09  615.61
   3   4  19  540.44  681.74
  -3   5  20 1382.93  802.05
  -3  -5  19  319.05  211.04
  -3   5  19  273.71  209.16
  -3  -5  18 1611.94  351.13
  -3   5  18 1306.63  423.52
  -3  -5  17  571.65  356.43
  -3   5  17  410.93  232.09
  -3  -5  17  211.19  302.77
  -3  -5  16 7101.22 1665.94
  -3   5  16 5621.39  683.27
  -3  -5  16 5371.64  831.28
  -3  -5  15  688.13  444.69
  -3   5  15 1139.68  228.96
  -3  -5  15  424.04  298.90
  -3   5  15  776.72  339.93
  -3  -5  14 1209.10  639.81
  -3   5  14 1040.55  230.02
  -3  -5  14 1431.94  768.78
  -3   5  14 1693.86  541.31
  -3  -5  13 1399.16  782.56
  -3   5  13 1492.54  269.20
  -3  -5  13 1772.36  479.47
  -3   5  13  580.12  273.49
  -3  -5  1210072.25  825.91
  -3   5  12 9992.81  723.98
  -3  -5  12 9428.70  836.57
  -3   5  1212950.36 1464.95
  -3  -5  11 2653.62 1116.53
  -3   5  11 2661.81  607.40
  -3  -5  11 1067.11  357.03
  -3   5  11 1749.44  469.97
   3  -5 -10    6.63  165.97
  -3  -5  10  664.02  340.24
  -3  -5  10  -38.21  157.38
  -3   5  10  126.08  167.04
   3  -5  -9 1849.35  339.01
  -3  -5   9 1648.62  724.48
  -3  -5   9 1546.14  503.20
  -3   5   9 1845.02  537.03
   3  -5  -8 7086.97  828.19
  -3  -5   8 6900.28  681.87
  -3  -5   8 6523.55  728.19
  -3   5   8 7110.44  678.93
   3  -5  -7 5585.83  561.69
  -3  -5   7 5906.99  496.40
  -3  -5   7 6834.34  618.49
  -3   5   7 6046.89  488.70
   3  -5  -6  598.53  266.19
  -3  -5   6 1172.08  301.79
  -3  -5   6 1336.24  764.09
  -3   5   6 1316.69  476.09
  -3  -5   5 1038.75  270.62
   3  -5  -5 1231.43  376.72
  -3  -5   5 1183.07  455.80
   3  -5  -5 1023.39  312.59
  -3  -5   5 1253.79  733.14
  -3  -5   454243.43 1707.86
   3  -5  -459906.69 1904.41
  -3   5   458618.52 1825.61
  -3  -5   458703.37 1820.28
   3  -5  -458067.00 1894.03
  -3  -5   456978.93 1911.19
  -3  -5   3  612.60  316.61
   3  -5  -3  818.35  200.63
  -3   5   3  776.08  228.08
  -3  -5   3  986.33  215.54
   3  -5  -3 1109.46  411.36
  -3  -5   3 1224.33  446.29
   3  -5  -2  150.82  107.09
  -3   5   2   98.36   69.29
  -3  -5   2   31.43   67.81
   3  -5  -2  411.21  271.18
  -3  -5   2  118.96  204.43
   3   5  -1 3823.42  284.50
   3  -5  -1 4623.31  424.15
  -3   5   1 3623.44  288.05
   3  -5  -1 3912.98 1083.78
  -3  -5   1 3145.05  353.60
   3  -5   053062.92 1677.01
  -3  -5   056542.33 1668.98
  -3   5   048637.51 1545.29
   3  -5   055457.80 1814.92
  -3  -5   053538.63 1722.72
   3   5   052604.90 1672.71
   3   5   1   76.68   36.98
   3  -5   1  211.26  291.88
  -3   5  -1   86.60  136.31
  -3  -5  -1  111.76   51.56
   3  -5   1  114.74  225.68
  -3  -5  -1  269.88  182.06
   3   5   1  255.02   96.02
   3   5   2  434.61   80.23
   3  -5   2  668.25  258.10
  -3  -5  -2  529.35  103.43
   3  -5   2  358.50  402.45
  -3  -5  -2  554.86  197.03
   3   5   2  647.70  143.09
   3  -5   3 1741.17  968.51
   3   5   3 1936.05  298.58
  -3  -5  -3 1320.19  170.40
   3  -5   3 1241.85  196.33
  -3  -5  -3 2650.54  590.84
   3   5   3 2172.06  384.77
   3  -5   442687.25 1369.58
   3   5   442934.10 1303.42
   3   5   440676.33 1245.34
   3  -5   5 4350.87  384.08
   3   5   5 5433.64  416.13
  -3  -5  -5 5457.21  408.73
   3  -5   5 5024.42  494.34
  -3  -5  -5 6136.94  457.59
   3   5   5 4681.53  367.46
   3  -5   6  251.71  222.80
   3   5   6   52.75  128.21
  -3  -5  -6   85.09   83.74
  -3  -5  -6  113.79   75.86
   3  -5   6  155.53  154.24
   3   5   6   56.87   80.51
   3  -5   7 3301.13  706.83
   3   5   7 1862.15  204.71
   3  -5   7 1862.12  425.42
   3   5   7 1942.42  111.01
   3  -5   825186.25 1227.20
   3   5   827042.93 1170.06
   3  -5   825255.82 1323.83
   3   5   824759.94  994.95
   3   5   826680.38 1074.51
   3  -5   9  986.14  315.37
   3   5   9  529.04  300.31
   3  -5   9 1070.21  312.45
   3   5   9  645.03   93.34
   3   5   9 1010.15  150.34
   3  -5  10  635.86  419.46
   3   5  10  821.53  220.38
   3  -5  10  464.39  237.36
   3  -5  11 5899.92  627.56
   3   5  11 6380.67 1038.73
   3  -5  11 5318.12  600.91
   3   5  1217117.67 1072.09
   3  -5  1216525.84 1012.50
   3   5  13  572.09  247.65
   3  -5  13  225.12  100.51
   3  -5  14  745.92  446.26
   3   5  14  539.03  359.15
   3  -5  15  279.84  230.48
   3   5  15  933.70  440.58
   3  -5  1615303.75 1415.54
   3   5  1616704.51 1525.77
   3  -5  17  523.60  493.62
   3   5  17  158.22  158.87
   3  -5  18  150.23  250.30
   3   5  18  824.09  308.49
   3   5  19 1001.23  272.87
  -3   6  20  343.51  357.76
  -3  -6  19  767.07  612.52
  -3   6  19  278.06  153.35
  -3  -6  18 2933.87  413.98
  -3   6  18 2147.71  362.64
  -3  -6  17  896.04  594.07
  -3   6  17 1442.84  444.44
  -3  -6  17 1425.58  766.84
  -3  -6  16  664.39  271.61
  -3   6  16  487.92  276.83
  -3  -6  16  -20.30  230.70
  -3  -6  15 5836.40  563.80
  -3   6  15 4154.18  636.62
  -3  -6  15 4039.73 1231.27
  -3  -6  14 7576.82 1770.32
  -3  -6  14 8418.76  528.07
  -3  -6  13 2971.56 1126.76
  -3   6  13 1698.88  390.25
  -3  -6  13 1948.56  437.56
  -3   6  13 1582.06  459.35
  -3  -6  12 3915.62  811.13
  -3   6  12 4598.39 1000.71
  -3  -6  12 3016.10  614.97
  -3   6  12 3178.24  318.20
  -3  -6  11 3983.35  522.58
  -3   6  11 4175.68  499.83
  -3  -6  11 4938.52  742.46
  -3   6  11 3515.63  296.29
   3  -6 -1026642.08 1590.96
  -3  -6  1025004.41 1549.37
  -3  -6  1023351.63 1623.41
  -3   6  1026691.01 1557.34
   3  -6  -9 9301.90  833.62
  -3  -6   9 7880.01  624.77
  -3  -6   9 9522.90  770.98
  -3   6   9 9970.92  778.04
   3  -6  -8  677.81  165.89
  -3  -6   8  268.35  130.58
  -3  -6   8   70.56  292.19
  -3   6   8  125.81  154.08
   3  -6  -711005.46  765.00
  -3  -6   711172.36  726.14
  -3  -6   710153.64  792.32
  -3   6   710853.63  863.14
   3  -6  -624926.95 1047.64
  -3  -6   627657.75 1054.12
   3  -6  -622616.51 1182.35
  -3  -6   627530.09 1385.20
  -3  -6   5 6045.93  436.98
   3  -6  -5 6706.44  555.09
  -3  -6   5 8303.64  588.67
   3  -6  -5 8679.30  654.73
  -3  -6   5 7869.59  714.47
  -3  -6   4 1894.14  129.07
   3  -6  -4 2324.39  475.48
  -3   6   4 2104.39  212.08
  -3  -6   4 2395.16  495.09
   3  -6  -4 2494.76  864.52
  -3  -6   4 2699.17  745.65
  -3  -6   3 2181.94  171.82
   3  -6  -3 2216.16  638.34
  -3   6   3 2182.92  351.14
  -3  -6   3 2666.97  313.77
   3  -6  -3 2701.43  951.71
  -3  -6   3 2857.32  742.62
   3  -6  -213447.52  772.64
  -3   6   212839.41  807.91
  -3  -6   213673.95  764.02
  -3  -6   215535.83 1411.91
  -3  -6   136053.72 1085.68
   3  -6  -138988.72 1311.54
  -3   6   135105.35 1137.52
  -3  -6   136478.51 1108.66
   3  -6  -135241.34 1272.94
  -3  -6   135327.18 1256.89
   3  -6   0 1533.82  391.39
  -3   6   0  720.71   97.99
   3  -6   0 1032.62  331.69
  -3  -6   0 1161.78  464.27
   3  -6   1 4522.48  409.03
   3  -6   1 4861.35  645.31
  -3  -6  -1 5314.29  521.05
   3   6   227804.86  791.04
   3  -6   226899.52  964.85
   3  -6   227894.82 1506.01
  -3  -6  -225759.23  897.25
   3   6   3 1417.70  203.60
   3   6   3 1633.17  163.82
   3  -6   3 2398.96  469.92
   3  -6   3 1139.74 1020.16
  -3  -6  -3 1809.26  499.44
   3   6   3 1538.89  408.01
   3   6   4 7310.83  519.60
   3  -6   4 7357.89  577.64
   3   6   4 7292.05  486.01
   3  -6   4 8693.64 1041.00
  -3  -6  -4 6274.16  579.35
   3   6   4 6342.38  621.39
   3   6   5 5453.60  537.66
   3  -6   5 5929.28  593.94
   3   6   5 5965.13  523.95
   3  -6   5 5866.45 1169.29
  -3  -6  -5 5869.66  543.93
   3   6   5 4778.21  448.55
   3   6   614046.48  875.10
   3  -6   614235.15 1077.01
   3   6   615882.72  970.73
  -3  -6  -615886.58  973.22
   3  -6   712391.11  894.21
   3   6   713839.32 1007.07
  -3  -6  -714086.23  934.32
   3  -6   712987.53  919.87
   3   6   711854.91  758.11
   3  -6   8  549.48  582.21
   3   6   8  669.41  184.62
  -3  -6  -8  480.35  181.13
   3  -6   8  207.45  192.16
   3   6   8  331.31  113.15
   3  -6   9 4578.88  426.42
   3   6   9 5040.04  381.80
   3  -6   9 4780.30  760.87
   3   6   9 4373.42  155.65
   3   6   9 4784.49  178.11
   3  -6  1020047.96 1484.45
   3   6  1019951.91 1157.92
   3  -6  1019767.23 1189.47
   3   6  1018053.69  994.81
   3  -6  11 8382.01  791.34
   3   6  11 9900.77  860.47
   3  -6  11 8090.58  651.25
   3  -6  12  695.90  496.50
   3   6  12  739.91  278.25
   3  -6  12  422.01  256.02
   3  -6  13 1787.31  436.47
   3  -6  13 1521.96  598.06
   3  -6  14 5992.65  634.46
   3   6  14 4270.30  681.56
   3   6  15  234.61  122.90
   3  -6  16  481.88  507.83
   3   6  16  284.72  391.11
   3  -6  17  669.28  396.82
   3   6  17  445.69  355.63
   3   6  18  950.68  516.17
  -3   7  20  632.90  344.94
  -3  -7  19 1529.32 1248.64
  -3   7  19  772.14  628.30
  -3  -7  18  647.20  426.76
  -3   7  18  615.30  351.65
  -3  -7  17 7373.22  842.75
  -3   7  17 7044.56  551.16
  -3  -7  17 6059.18  781.61
  -3  -7  16  332.37  183.55
  -3   7  16   53.84  130.19
  -3  -7  16  633.59  199.20
  -3  -7  15 6527.59  642.73
  -3   7  15 5689.16  390.80
  -3  -7  15 6319.91  898.10
  -3  -7  14  291.74  308.04
  -3   7  14  470.97  211.86
  -3  -7  14  440.41  396.72
  -3   7  14   99.68   76.65
  -3  -7  1315723.49 1210.69
  -3   7  1313355.07  995.68
  -3  -7  1312049.56 1138.19
  -3   7  1314685.92 1103.75
  -3  -7  12  252.10  179.24
  -3   7  12  203.15  251.95
  -3  -7  12  126.94  222.66
  -3   7  12  104.52  157.76
  -3  -7  1113986.47  955.10
  -3   7  1112737.99  995.81
  -3  -7  1114125.59  937.95
  -3   7  1112172.27  887.26
   3  -7 -10 1394.94  487.54
  -3  -7  10  681.64  219.90
  -3  -7  10  512.21  461.21
  -3   7  10 1270.33  437.92
   3  -7  -9 5580.48  675.82
  -3  -7   9 3896.09  966.42
  -3  -7   9 5561.16 1278.50
  -3   7   9 5206.80  428.45
   3  -7  -8 1541.47  540.52
  -3  -7   8 1673.07  313.11
  -3  -7   8 1568.28  482.62
  -3   7   8 1220.15  617.09
  -3  -7   717158.64 1002.53
   3  -7  -716862.45 1037.12
  -3  -7   716841.80  880.92
   3  -7  -6  286.32  196.32
  -3  -7   6  449.25  225.01
   3  -7  -6  306.44  327.56
  -3  -7   6  443.78  282.84
   3  -7  -517636.09 1073.44
  -3  -7   517197.99 1021.45
   3  -7  -516226.19 1041.45
  -3  -7   518270.72 1167.01
  -3  -7   4  233.22   99.49
   3  -7  -4  163.29  161.37
  -3  -7   4  377.68  184.18
   3  -7  -4   61.94  169.04
  -3  -7   4  376.01  389.09
   3  -7  -329060.16  996.81
  -3   7   325877.34  949.72
  -3  -7   327981.18  903.24
   3  -7  -324764.82 1087.54
  -3  -7   325141.24 1228.82
  -3  -7   2 1491.96  276.19
   3  -7  -2 1526.44  200.31
  -3   7   2 1239.07  288.09
  -3  -7   2 1331.72  182.21
  -3  -7   2 1477.48  574.95
  -3  -7   144238.00 1272.99
   3  -7  -142911.74 1424.28
  -3   7   140879.70 1265.74
  -3  -7   142727.92 1228.14
   3  -7  -144897.51 1596.91
  -3  -7   138820.84 1380.76
   3  -7   0 2508.21  208.99
   3  -7   0 3639.66  491.29
  -3  -7   0 3320.92  876.40
   3  -7   143289.24 1384.72
   3  -7   137687.24 1600.96
  -3  -7  -139264.08 1396.64
   3  -7   2  247.78  200.89
   3  -7   2   92.41  283.93
  -3  -7  -2  683.63  230.05
   3   7   319910.74 1005.97
   3   7   319855.49 1003.26
   3  -7   318891.09 1068.10
   3  -7   319042.40 1406.84
  -3  -7  -318301.35 1105.32
   3   7   4 2190.79  216.69
   3   7   4 2297.51  153.65
   3  -7   4 2662.14  766.77
   3  -7   4 3241.06  428.09
  -3  -7  -4 3046.97  637.96
   3   7   510966.29  655.57
   3  -7   511410.53  793.90
   3   7   512041.94  702.23
  -3  -7  -512687.20  876.26
   3  -7   511134.01  814.10
   3   7   6  221.77   97.75
   3  -7   6  325.85  163.68
   3   7   6   49.36   80.58
  -3  -7  -6  280.25  190.39
   3  -7   6  472.62  386.66
   3   7   6  250.59   92.74
   3   7   723124.71 1263.40
   3  -7   726003.59 1522.61
   3   7   721030.80 1262.56
  -3  -7  -721987.76 1353.48
   3  -7   724309.60 1434.70
   3   7   721449.99 1219.10
   3  -7   8  149.65  220.39
   3   7   8   -7.26   97.60
  -3  -7  -8   46.49   97.22
   3  -7   8   37.69  143.54
   3   7   8  106.86   75.37
   3  -7   9 9471.99 1401.02
   3   7   9 7929.44  737.29
  -3  -7  -9 7936.95  688.66
   3  -7   9 8645.16  780.98
   3  -7  10  195.65  230.12
   3   7  10  760.26  201.02
   3  -7  10  318.93  286.65
   3   7  10  321.95  152.65
   3  -7  11  257.58  279.22
   3   7  11  368.59  193.75
   3  -7  11  191.75  293.44
   3  -7  12  239.20  266.48
   3   7  12  605.43  180.66
   3  -7  12  130.20  193.14
   3  -7  13 6767.32  944.87
   3   7  13 6517.15  402.85
   3  -7  13 4878.32  681.00
   3  -7  14 2108.97  981.57
   3   7  14  808.76  605.69
   3  -7  1512867.61 1470.56
   3   7  1514333.71 1295.00
   3  -7  16  466.93  313.09
   3   7  16   16.58  135.76
   3  -7  17 7159.19 1542.50
  -3   8  19  823.87  393.23
  -3  -8  18 4415.75 1299.95
  -3   8  18 3879.65  550.84
  -3  -8  17 1391.72  503.84
  -3   8  17 1005.44  663.72
  -3  -8  17 1067.79  603.58
  -3  -8  16 1190.40  451.37
  -3   8  16  760.08  262.32
  -3  -8  16  301.44  238.46
  -3  -8  15 1770.34  884.87
  -3   8  15 1926.59  467.37
  -3  -8  15 2046.94  822.63
  -3  -8  1411009.64 1114.49
  -3   8  1412348.01  658.93
  -3  -8  1411820.36  753.61
  -3   8  1412762.81  807.08
  -3  -8  13 2330.12 1049.13
  -3   8  13 2416.68  381.17
  -3  -8  13 2553.96  659.95
  -3   8  13 2648.74  886.74
  -3  -8  12  665.01  329.67
  -3   8  12  188.38  132.75
  -3  -8  12  152.82  282.95
  -3   8  12  106.92   88.06
  -3  -8  11 8526.10  741.41
  -3   8  11 6283.68  395.71
  -3  -8  11 5522.95  513.02
  -3   8  11 6202.44  553.86
   3  -8 -1015434.40  951.76
  -3  -8  1013232.13  947.56
  -3  -8  1012769.61  971.53
  -3   8  1014842.74 1463.48
   3  -8  -9  934.95  639.81
  -3  -8   9 1304.63  466.10
  -3  -8   9 1264.21  383.26
  -3   8   9 1698.79  702.44
   3  -8  -8  387.35  260.46
  -3  -8   8  599.69  208.34
   3  -8  -8  172.32  191.11
  -3  -8   8  279.03  354.12
   3  -8  -7 5313.73  784.36
  -3  -8   7 6238.92  845.95
   3  -8  -7 5420.74  592.94
  -3  -8   7 8467.40  967.76
   3  -8  -619541.09  926.98
  -3  -8   618781.01  859.65
   3  -8  -618022.65 1129.41
  -3  -8   621412.26 1057.17
   3  -8  -5 9024.32  772.82
  -3  -8   5 9089.58  634.83
   3  -8  -5 8084.60  898.46
  -3  -8   510012.36 1108.74
  -3  -8   4  705.92  275.90
   3  -8  -4  929.68  272.61
  -3  -8   4  943.62  337.89
   3  -8  -4 1146.22  428.65
  -3  -8   4 1391.19  479.85
   3  -8  -3  329.36  315.87
  -3  -8   3  711.65  237.33
   3  -8  -3  763.10  517.33
  -3  -8   237292.56 1293.52
   3  -8  -239412.60 1446.72
  -3  -8   238242.16 1331.86
  -3  -8   237713.79 1750.78
  -3  -8   114812.94  830.81
   3  -8  -115407.34  928.64
  -3  -8   114121.03  791.69
   3  -8  -114511.38 1049.53
  -3  -8   115316.71 1072.78
   3  -8   0 1727.41  465.17
   3  -8   0 1309.08  783.12
  -3  -8   0 2173.71  668.14
   3  -8   110189.74  657.25
   3  -8   112273.80 1359.70
  -3  -8  -1 9766.18  765.63
   3  -8   223382.21  926.25
   3  -8   226584.68 1105.98
  -3  -8  -224092.93 1046.69
   3  -8   3 9179.13  628.13
   3  -8   3 8819.72  825.96
  -3  -8  -3 6915.18  665.26
   3   8   4  311.29   83.35
   3   8   4  455.39   77.86
   3  -8   4  520.84  177.89
   3  -8   4  769.03  550.25
  -3  -8  -4  500.23  165.05
   3   8   5 1055.32  141.35
   3  -8   5 1596.14  591.19
   3   8   5 1015.35  257.69
  -3  -8  -5 1484.56  567.96
   3  -8   5 1754.53  827.57
   3   8   630215.91 1637.62
   3  -8   632985.59 1913.32
   3   8   631801.46 1703.38
  -3  -8  -631433.09 1863.48
   3  -8   631866.98 1864.04
   3   8   7 8496.81  682.49
   3  -8   7 8489.99  760.38
   3   8   7 9248.95  722.31
  -3  -8  -7 7701.66  664.38
   3  -8   7 8629.32  809.16
   3  -8   8  760.95  305.70
   3   8   8  430.49  182.96
  -3  -8  -8  483.17  199.60
   3  -8   8  562.32  218.51
   3  -8   9 1818.25  874.06
   3   8   9 1997.15  272.36
  -3  -8  -9 1597.73  293.28
   3  -8   9 1484.94  736.34
   3  -8  10 6835.17  896.37
   3   8  10 7390.77  558.71
   3  -8  10 6549.29  529.09
   3  -8  11 2950.07  932.24
   3   8  11 2617.51  489.26
   3  -8  11 2236.58  832.07
   3  -8  12 1124.82  417.02
   3   8  12  899.51  456.53
   3  -8  12  321.87  332.64
   3  -8  13 1390.25  467.34
   3  -8  13  909.19  436.84
   3  -8  14 2340.73  991.66
   3   8  14 3946.59  540.07
   3  -8  15 3012.63  428.41
   3  -8  16  533.10  370.44
   3  -8  17 2404.04  570.55
  -3  -9  18  379.72  466.88
  -3  -9  17   72.58   81.98
  -3   9  17  244.86  286.75
  -3  -9  17   43.84  172.25
  -3  -9  16 9892.04  790.40
  -3   9  16 9575.31  688.87
  -3  -9  16 6424.69 1295.97
  -3  -9  15  149.50  118.47
  -3   9  15   75.75  186.33
  -3  -9  15  198.40  268.85
  -3  -9  14  838.80  257.83
  -3   9  14  268.20  223.41
  -3  -9  14  173.40  251.84
  -3   9  14  157.10  134.02
  -3  -9  13  996.28  351.05
  -3   9  13   54.17  135.66
  -3  -9  13 1104.73  539.35
  -3   9  13  145.69  179.27
  -3  -9  12 9898.93  679.17
  -3   9  1210441.07 1024.74
  -3  -9  12 9502.54  785.20
  -3   9  12 9460.12  816.32
  -3  -9  11 1077.54  272.91
  -3   9  11 1643.46  512.80
  -3  -9  11 1183.10  593.86
  -3   9  11 1523.24  411.54
   3  -9 -10  677.11  466.81
  -3  -9  10  724.16  251.95
  -3  -9  10  666.67  780.92
  -3   9  10  599.22  345.35
   3  -9  -9  624.46  163.14
  -3  -9   9  321.37  156.17
  -3  -9   9  861.77  340.17
   3  -9  -8 4826.38  295.51
  -3  -9   8 4560.51  338.79
   3  -9  -8 4033.86  330.11
  -3  -9   8 4437.08 1266.78
   3  -9  -7 1391.86  391.15
  -3  -9   7 1154.97  397.87
   3  -9  -7 1172.01  552.15
  -3  -9   7 1987.91  600.58
   3  -9  -6 3542.29  695.70
  -3  -9   6 3223.54  383.85
   3  -9  -6 3361.02  592.39
  -3  -9   6 2870.38  520.15
   3  -9  -5  278.16  263.37
  -3  -9   5  341.95  136.61
   3  -9  -5  230.08  306.83
  -3  -9   5  436.23  262.33
   3  -9  -432883.56 1466.35
  -3  -9   428711.76 1175.79
   3  -9  -428830.43 1572.36
  -3  -9   428971.96 1382.38
  -3  -9   3 2274.23  230.67
   3  -9  -3 1957.12  258.10
  -3  -9   3 2330.56  166.11
   3  -9  -3 2393.34  625.68
  -3  -9   210377.02  673.25
   3  -9  -2 9249.68  665.67
  -3  -9   2 9386.98  597.25
   3  -9  -212037.54 1078.70
  -3  -9   2 9364.82 1013.33
   3  -9  -1 1276.37  394.96
   3  -9  -1 1070.26  422.05
  -3  -9   1 1430.10  787.49
   3  -9   029971.33 1293.42
   3  -9   035870.30 1719.06
  -3  -9   033371.68 1526.05
   3  -9   1 5258.36  544.07
   3  -9   1 4506.43  431.66
  -3  -9  -1 6259.44 1001.32
   3  -9   2  327.58  306.93
   3  -9   2  519.12  465.08
  -3  -9  -2 1040.07  426.34
   3  -9   3  205.15  115.70
   3  -9   3  641.87  488.59
  -3  -9  -3  768.58  258.89
   3  -9   410837.90  953.43
   3  -9   412993.90  919.34
  -3  -9  -411277.55  933.06
   3   9   5  813.65  108.22
   3   9   5  920.94  118.29
   3  -9   5 1102.77  209.91
   3  -9   5  445.32  222.82
  -3  -9  -5 1074.83  251.37
   3  -9   6  367.66  152.42
   3   9   6  144.08   64.02
  -3  -9  -6  -21.41  125.35
   3  -9   6  416.76  262.33
   3  -9   7  923.79  293.99
   3   9   7  207.06  224.35
  -3  -9  -7 1211.05  412.06
   3  -9   7  886.07  376.40
   3  -9   810555.69  778.75
   3   9   810483.77  667.01
  -3  -9  -8 8092.87  627.87
   3  -9   810217.23  750.77
   3  -9   9 2172.05  799.51
   3   9   9 2806.91  176.46
  -3  -9  -9 1995.53  390.26
   3  -9   9 1956.14  570.66
   3  -9  10  436.63  386.39
   3   9  10  140.74   99.32
  -3  -9 -10  176.28  169.56
   3  -9  10  114.18  220.74
   3  -9  11 2330.70  741.86
   3  -9  11 1637.88  538.44
   3  -9  1212116.20 1140.26
   3  -9  1213546.04 1027.74
   3  -9  13  425.43  346.63
   3  -9  13   93.34  367.07
   3  -9  14  923.40  408.27
   3  -9  15  312.40  299.00
   3  -9  16 4329.40 1547.74
  -3 -10  18  974.97  229.75
  -3 -10  17  800.56  464.13
  -3 -10  17 1455.33  624.09
  -3 -10  16  431.45  381.57
  -3 -10  16   92.51  119.23
  -3 -10  15 2902.90  511.23
  -3  10  15 1564.47  499.81
  -3 -10  15 3978.55 1030.51
  -3 -10  14  658.41  260.97
  -3  10  14  311.60  270.96
  -3 -10  14  714.67  498.27
  -3 -10  13 1999.41  624.42
  -3  10  13 4451.85  345.98
  -3 -10  13 3606.11  999.62
  -3  10  13 3251.64  415.04
  -3 -10  12   72.27  177.50
  -3  10  12   62.62  194.14
  -3 -10  12  283.43  237.91
  -3  10  12  286.53  245.52
  -3 -10  11 7234.32  495.62
  -3  10  11 6079.27  375.15
  -3 -10  11 8037.01  608.81
  -3  10  11 6301.99  634.98
   3 -10 -10 4296.23  326.84
  -3 -10  10 4592.85  439.88
  -3 -10  10 3553.28  718.17
  -3  10  10 5339.79  865.16
   3 -10  -9 8248.26  623.14
  -3 -10   9 8363.41  672.33
   3 -10  -9 7952.72  836.97
  -3 -10   9 8215.64  794.86
   3 -10  -8 5432.05  369.47
  -3 -10   8 4407.92  566.06
   3 -10  -8 5656.27 1309.65
  -3 -10   8 5364.84  763.09
   3 -10  -7 3531.00  579.59
  -3 -10   7 4387.21  518.23
   3 -10  -7 4272.07  799.51
  -3 -10   7 4410.35  594.17
   3 -10  -6 1544.87  501.29
  -3 -10   6 2161.58  236.90
   3 -10  -6 1678.79  751.87
  -3 -10   6 1768.31  585.62
   3 -10  -510878.22  941.80
  -3 -10   511651.71  909.85
   3 -10  -511109.35 1099.02
  -3 -10   511772.52 1022.37
   3 -10  -4  129.62   96.01
  -3 -10   4   25.78   61.55
   3 -10  -4  184.17  127.87
  -3 -10   4  252.28  143.55
  -3 -10   3 8891.02  522.99
   3 -10  -3 9622.55  690.68
  -3 -10   3 9508.57  587.70
   3 -10  -311227.66  841.72
  -3 -10   310420.20  831.13
  -3 -10   2 1587.66  221.85
   3 -10  -2 2042.10  556.51
  -3 -10   2 1375.40  182.78
   3 -10  -2 1414.43  348.23
  -3 -10   2 1493.94  358.73
   3 -10  -113790.67  899.04
  -3 -10   112395.49  923.68
   3 -10   0  145.53  121.30
   3 -10   0   50.30  188.50
  -3 -10   0  -15.55  369.77
   3 -10   1 2284.36  350.59
   3 -10   1 2079.56  281.35
  -3 -10  -1 3097.12  977.28
   3 -10   2  102.63  194.12
   3 -10   2  174.01  303.20
  -3 -10  -2   73.04  351.93
   3 -10   316960.13 1070.49
   3 -10   320368.47 1730.09
  -3 -10  -317829.08 1095.55
   3 -10   4  605.44  333.39
   3 -10   4  331.44  420.07
  -3 -10  -4  171.18  224.37
   3 -10   5 2809.39  411.74
   3 -10   5 2428.19  881.72
  -3 -10  -5 2679.61 1008.83
   3 -10   617512.89 1058.60
  -3 -10  -616343.94 1174.45
   3 -10   617376.33 1293.64
   3 -10   7 4355.57  754.30
  -3 -10  -7 6539.85  691.67
   3 -10   7 5987.82 1165.12
   3 -10   8  937.76  284.84
  -3 -10  -8  581.10  337.45
   3 -10   8  761.75  522.14
   3 -10   9 7255.14  436.08
  -3 -10  -9 6034.86  352.69
   3 -10   9 8183.34  646.18
   3 -10  10  615.65  401.01
   3 -10  10  664.78  303.84
   3 -10  11 4906.08 1430.02
   3 -10  11 6050.06 1269.55
   3 -10  12  150.11  208.53
   3 -10  12   24.32   77.91
   3 -10  13 2714.09  353.56
   3 -10  13 3537.32 1051.87
   3 -10  14 1627.97  731.26
   3 -10  15 1704.11 1183.89
   3 -10  16   12.31  217.40
  -3 -11  17 1343.61  733.54
  -3 -11  17 1521.91  612.09
  -3 -11  16 1991.66  788.04
  -3 -11  16 1934.05 1141.13
  -3 -11  15 2331.98  356.34
  -3 -11  15  912.10  698.42
  -3 -11  14  539.24  182.09
  -3 -11  14  317.98  471.15
  -3 -11  13 2771.43  510.63
  -3 -11  13 3949.92 1015.95
  -3  11  13 2000.66  441.68
  -3 -11  12 2835.51  309.13
  -3  11  12 2214.17  633.31
  -3 -11  12 3087.48  936.24
  -3  11  12 2185.32  607.34
  -3 -11  1110186.88 1186.66
  -3  11  11 8766.83 1075.83
  -3 -11  11 6684.55 1677.86
  -3  11  11 8482.83  514.15
  -3 -11  10 1104.82  369.82
  -3 -11  10 -167.38  261.26
  -3  11  10  203.45  180.81
   3 -11  -9 9171.38  422.11
  -3 -11   9 6860.96  761.25
   3 -11  -9 9244.78  536.55
  -3 -11   9 8377.85 1107.27
   3 -11  -812722.31  966.33
  -3 -11   814138.79  856.57
   3 -11  -812800.41  903.28
  -3 -11   812643.71  900.85
   3 -11  -7 1861.86  511.69
  -3 -11   7 2453.97  398.99
   3 -11  -7 1818.51  614.76
  -3 -11   7 2157.85  601.96
  -3 -11   6  206.67  121.38
   3 -11  -6  234.59  203.31
  -3 -11   6  362.80  510.89
   3 -11  -526047.36 1494.40
  -3 -11   524547.22 1402.18
   3 -11  -524813.08 1529.06
  -3 -11   526761.07 1686.95
   3 -11  -416524.98 1053.64
  -3 -11   415897.67  912.11
   3 -11  -415119.08 1223.34
  -3 -11   417192.07 1135.12
   3 -11  -312505.79  732.78
  -3 -11   311553.59  884.98
   3 -11  -312229.09  554.13
  -3 -11   311226.44 1382.48
   3 -11  -2 1610.20  421.71
  -3 -11   2 1262.39  125.95
  -3 -11   2 1373.81  132.39
   3 -11  -2 1397.01  421.40
  -3 -11   2 2236.81  760.86
   3 -11  -112486.97  739.45
  -3 -11   111581.35 1143.24
   3 -11   0  402.89  207.13
   3 -11   0  328.96  332.77
  -3 -11   0  277.40  494.02
   3 -11   1 6518.98  614.60
   3 -11   1 6564.35 1555.82
  -3 -11  -1 5615.24  442.57
   3 -11   2 8820.77  762.02
   3 -11   2 8326.55  754.81
  -3 -11  -210358.64  899.63
   3 -11   313729.69  935.16
   3 -11   312011.24  916.06
  -3 -11  -314219.07 1145.30
   3 -11   412580.62  499.28
   3 -11   410620.04  971.01
  -3 -11  -412191.26  968.68
   3 -11   510990.96 1098.89
  -3 -11  -514954.90  936.22
   3 -11   511041.62  802.62
   3 -11   6  157.98  238.07
  -3 -11  -6  103.10  158.79
   3 -11   6  293.11  153.53
   3 -11   715009.27 1149.18
  -3 -11  -716836.34 1007.09
   3 -11   714351.43 1098.92
   3 -11   8 3204.74  733.63
  -3 -11  -8 3618.37  687.12
   3 -11   8 2586.19  867.48
   3 -11   9 6216.45  466.78
  -3 -11  -9 5718.39  422.49
   3 -11   9 6427.32 1215.90
   3 -11  10   63.03  204.04
   3 -11  10  294.18  211.71
   3 -11  11 1081.11  449.81
   3 -11  11 2124.55  440.06
   3 -11  12 1491.26  595.15
   3 -11  12 1872.24  709.39
   3 -11  13 2118.05 1346.22
   3 -11  13 1703.90  541.30
   3 -11  14  221.48  395.62
   3 -11  15  356.52  773.36
   3 -11  16  644.45  473.89
  -3 -12  17  128.90  139.90
  -3 -12  17  689.29  260.30
  -3 -12  16  374.91  228.46
  -3 -12  16  558.21  193.61
  -3 -12  15  430.81  480.18
  -3 -12  15 1175.24  686.63
  -3 -12  14 4461.87  339.41
  -3 -12  14 5822.13  708.01
  -3 -12  13   60.07  243.27
  -3 -12  13  449.97  391.27
  -3  12  13  338.78  227.89
  -3 -12  12  375.91  260.52
  -3 -12  12  369.68  287.49
  -3  12  12   60.07  211.86
  -3 -12  11   -4.06  189.37
  -3 -12  11  228.96  320.97
  -3 -12  1020673.39  672.01
   3 -12 -1017590.71 1533.98
  -3 -12  1018131.72 1016.53
   3 -12  -9  111.10  137.79
  -3 -12   9  144.98  182.43
   3 -12  -9  183.80   71.45
  -3 -12   9  114.37  232.36
   3 -12  -8  438.39  201.35
  -3 -12   8    1.16  158.81
   3 -12  -8  302.83  152.08
  -3 -12   8  520.60  479.83
   3 -12  -7  211.71  177.20
  -3 -12   7  163.34  196.83
   3 -12  -7  758.43  327.30
  -3 -12   7 1065.74  456.53
   3 -12  -613888.79  854.17
  -3 -12   615359.69  878.24
   3 -12  -616428.58 1525.94
  -3 -12   615104.49 1597.34
   3 -12  -5 2386.13  628.48
  -3 -12   5 1889.77  348.55
   3 -12  -5 2826.90  946.54
  -3 -12   5 3443.31  893.76
   3 -12  -4 2644.43  539.38
  -3 -12   4 3102.90  270.39
   3 -12  -4 2754.83  892.96
   3 -12  -3  271.98  142.95
  -3 -12   3   57.21   48.32
   3 -12  -3  122.04  240.54
  -3 -12   3  661.15  380.34
   3 -12  -221564.41 1246.90
   3 -12  -221882.01 1473.91
  -3 -12   222587.99 1536.87
   3 -12  -1  168.25  130.12
  -3 -12   1  353.61  245.37
   3 -12   0 2120.31  468.43
   3 -12   0 2085.44  775.25
  -3 -12   0 3091.89 1178.35
   3 -12   1  129.44  156.44
   3 -12   1  595.88  395.25
  -3 -12  -1  231.45  295.70
   3 -12   230081.32 1629.26
   3 -12   234645.14 1899.38
  -3 -12  -230595.49 1662.38
   3 -12   3  364.26  216.51
   3 -12   3  544.09  350.42
  -3 -12  -3  648.79  192.75
   3 -12   4 1750.89  742.12
   3 -12   4  748.64  379.11
  -3 -12  -4 2024.64  585.16
   3 -12   5   59.07  126.90
  -3 -12  -5 1013.88  393.50
   3 -12   5  731.48  294.28
   3 -12   621405.14 1306.56
  -3 -12  -619878.05 1301.19
   3 -12   620859.92 2327.55
   3 -12   7 2252.58  630.79
  -3 -12  -7 1645.40  477.75
   3 -12   7 1536.17  648.91
   3 -12   8 1316.01  681.00
  -3 -12  -8 1164.19  512.98
   3 -12   8 2409.13  803.70
   3 -12   9  396.35  204.72
   3 -12   9  142.71  256.30
   3 -12  1010438.35 1487.47
   3 -12  1013693.09 2107.77
   3 -12  11  199.80  351.00
   3 -12  11  357.17  222.32
   3 -12  12   94.21  244.02
   3 -12  12  474.20  247.87
   3 -12  13  792.81  322.89
   3 -12  13  427.76  306.79
   3 -12  14 4718.13  886.36
   3 -12  15  315.94  236.19
  -3 -13  16 1003.89  607.57
  -3 -13  16  261.87  503.85
  -3 -13  15 1203.25  351.52
  -3 -13  15 1240.55  447.94
  -3 -13  14  660.72  480.36
  -3 -13  13 2660.90  490.61
  -3 -13  13 4094.24 1289.97
  -3 -13  12 8791.64  640.05
  -3 -13  12 8271.62  706.30
  -3  13  12 7908.21  644.35
  -3 -13  11  512.64  327.79
  -3 -13  11  764.68  512.19
  -3  13  11   50.29  172.01
  -3 -13  10  182.27  113.18
   3 -13 -10  182.50  222.46
  -3 -13  10 1106.68  538.88
  -3 -13   9 2400.92  877.15
   3 -13  -9 3584.11 1089.56
  -3 -13   9 2122.46 1291.56
  -3 -13   8 2945.24  338.03
   3 -13  -8 2837.24  749.95
  -3 -13   8 3567.24  504.43
   3 -13  -7 4708.46 1568.16
  -3 -13   7 4009.47  578.45
   3 -13  -6  182.09  318.04
  -3 -13   6  126.74  272.22
   3 -13  -5 2861.96 1076.17
  -3 -13   5 2675.38  614.34
   3 -13  -4 9251.43  440.87
   3 -13  -410865.61  834.64
   3 -13  -3 2169.84  436.06
   3 -13  -3 3486.39 1009.67
  -3 -13   3 2130.86  922.26
   3 -13  -2  144.37  190.47
   3 -13  -2  176.81  227.22
  -3 -13   2  474.34  443.96
   3 -13  -1 9912.93  648.92
   3 -13  -110411.44 1460.91
  -3 -13   110853.98  738.86
   3 -13   0  548.94  239.09
   3 -13   0  551.95  291.93
  -3 -13   0 1106.50  582.25
   3 -13   1 1408.39  295.42
   3 -13   1 1897.91  596.49
  -3 -13  -1 1555.11  699.07
   3 -13   2 1700.07  574.44
   3 -13   2 1882.72  503.92
  -3 -13  -2  909.30  348.42
   3 -13   3 6325.39  551.09
   3 -13   3 6458.02 1562.34
  -3 -13  -3 7621.20 1122.75
   3 -13   4 6923.99  421.10
   3 -13   4 8164.76  986.20
  -3 -13  -4 6214.92 1278.16
   3 -13   5 2876.01 1007.28
   3 -13   5 3732.60  912.66
  -3 -13  -5 4379.13  394.13
   3 -13   6  111.58   65.70
  -3 -13  -6  371.21  241.60
   3 -13   7 3710.23  528.47
  -3 -13  -7 2784.93  940.13
   3 -13   7 2770.53  920.75
   3 -13   8 6418.60  817.91
  -3 -13  -8 6997.44  969.60
   3 -13   8 5065.25  671.95
   3 -13   9 5501.63 1088.23
   3 -13   9 8226.24 2094.06
   3 -13  10  600.58  146.15
   3 -13  10  251.41  382.71
   3 -13  11  242.46  333.10
   3 -13  11 1283.90  557.72
   3 -13  12 1683.16  569.89
   3 -13  12 2044.79  605.72
   3 -13  13 5490.71 1045.82
   3 -13  13 4957.92 1328.94
   3 -13  14  260.64  343.33
  -3 -14  14  689.94  540.92
  -3 -14  13 1737.35 1279.01
  -3 -14  12  240.11  192.39
  -3  14  12   43.80  120.85
  -3 -14  11 4090.76 1470.62
  -3  14  11 4090.55  645.00
   3 -14 -10  244.31  152.33
  -3 -14  10  583.08  329.61
   3 -14  -9 1116.42  710.86
  -3 -14   9 1896.87  973.55
   3 -14  -8  277.70  206.02
  -3 -14   8  196.35  343.51
   3 -14  -7 4508.38 1173.00
  -3 -14   7 2566.98 1030.42
   3 -14  -6  259.42  210.30
  -3 -14   6  509.93  586.18
   3 -14  -5 7103.76  658.25
  -3 -14   5 8576.79  684.00
   3 -14  -4  195.69  417.96
   3 -14  -3 7656.42 1302.38
  -3 -14   3 9138.39 1986.64
   3 -14  -2  554.22  467.59
  -3 -14   2  443.60  227.36
   3 -14  -1 7070.02  610.56
  -3 -14   1 8063.36  634.20
   3 -14   0 1668.25  762.00
  -3 -14   0 1381.82  927.65
   3 -14   1 1703.13  481.74
   3 -14   1 2104.82  608.41
  -3 -14  -1 1413.14  816.00
   3 -14   2  704.96  306.96
   3 -14   2  678.25  250.04
  -3 -14  -2  804.19  427.00
   3 -14   311409.39  998.20
   3 -14   3 9934.17  791.16
  -3 -14  -313017.35 1228.33
   3 -14   4  444.04  344.61
  -3 -14  -4  373.45  184.89
   3 -14   5  860.73  409.14
  -3 -14  -5 2885.78  733.67
   3 -14   5 1408.17  504.36
   3 -14   6   27.51  269.85
  -3 -14  -6  199.53  287.70
   3 -14   6 1772.06  545.38
   3 -14   7 2498.61  475.33
  -3 -14  -7 3569.84  967.94
   3 -14   7 4057.95  739.48
   3 -14   8  381.77  178.92
  -3 -14  -8  470.60  187.79
   3 -14   8 1074.12  488.85
   3 -14   9 1708.83  480.98
   3 -14   9 2391.57  573.92
   3 -14  10  287.09  284.08
   3 -14  10  186.58  213.85
   3 -14  11 2923.42  646.76
   3 -14  11 3838.32  727.39
   3 -14  12  189.43  336.06
   3 -14  12  604.20  284.05
   3 -14  13 1789.95 1152.34
   3 -14  13 2836.69  931.26
   3 -14  14  384.66  152.09
  -3 -15  13  401.37  277.97
  -3 -15  12 3052.53 1090.33
  -3 -15  11  664.91  226.22
  -3  15  11  816.94  552.75
   3 -15 -10  561.95  329.98
  -3 -15  10  710.63  526.35
   3 -15  -9  230.10  267.01
  -3 -15   9  828.94  388.63
   3 -15  -815100.40 1401.11
  -3 -15   8 9026.57 1326.88
   3 -15  -7  371.95  292.49
  -3 -15   7  208.88  162.07
   3 -15  -6  976.51  403.93
  -3 -15   6  543.22  395.69
   3 -15  -5 1869.01  724.20
   3 -15  -4 7960.21 1742.89
  -3 -15   4 7698.19 1952.60
   3 -15  -3 3518.79  841.97
  -3 -15   3 2059.68 1201.71
   3 -15  -2  298.44  220.30
  -3 -15   2  -50.83  279.88
   3 -15  -1 3021.18  853.36
  -3 -15   1 4013.16 1282.33
  -3 -15   0 3992.00 1361.88
   3 -15   1 1774.50  421.85
  -3 -15  -1 2140.83  636.53
   3 -15   2  684.45  507.47
  -3 -15  -2 1361.81  505.97
   3 -15   3 5011.52  436.42
  -3 -15  -3 4786.21 1278.30
   3 -15   4 4613.94  683.88
  -3 -15  -4 6498.27 1549.18
   3 -15   5 1387.31  535.87
  -3 -15  -5 2155.84  625.13
  -3 -15  -6  155.95  145.36
   3 -15   6  139.93  158.67
  -3 -15  -7  746.77  368.99
   3 -15   7  510.75  173.51
   3 -15   8 7674.49 1334.57
   3 -15   9  -20.17  143.49
   3 -15   9 1044.44  751.29
   3 -15  10  408.00  292.29
   3 -15  10  408.17  329.07
   3 -15  11 5311.46  795.04
   3 -15  12 2526.70  860.71
   3 -16 -10 5360.92  793.36
  -3 -16  10 5535.03  651.32
   3 -16  -9  120.34   85.18
  -3 -16   9  693.37  297.09
   3 -16  -8  676.71  327.69
  -3 -16   8  417.92  866.93
   3 -16  -7 2333.83  613.52
  -3 -16   7 2507.59 1356.00
   3 -16  -612550.44 1009.37
  -3 -16   616391.77  937.71
   3 -16  -5  188.15  209.48
  -3 -16   5  732.23  508.49
   3 -16  -4  362.94  210.71
  -3 -16   4 1552.23  576.83
   3 -16  -3  711.20  277.51
  -3 -16   3  444.62  562.01
   3 -16  -215170.33 1624.16
  -3 -16   215007.34 1590.49
   3 -16  -1 2523.31  925.99
  -3 -16   1 3346.06  598.69
  -3 -16   0  959.04  608.69
   3 -16   1  305.55  281.83
  -3 -16  -1 1004.94  490.75
   3 -16   218219.48 1707.80
  -3 -16  -216753.74 1564.62
   3 -16   3 1457.11  663.81
  -3 -16  -3 1918.61  610.31
  -3 -16  -4  165.37  207.62
   3 -16   4  279.96  265.89
   3 -16   5  203.60  208.39
  -3 -16  -5  407.67  216.11
  -3 -16  -6 7075.24 1016.29
   3 -16   6 4680.41 1488.23
  -3 -16  -7  993.70  496.86
   3 -16   7 1615.74  647.05
   3 -16   8  415.73  373.02
   3 -16   9 1262.73  663.89
   3 -16  10 4081.24 1168.92
   3 -17 -10  194.38  200.26
   3 -17  -9 1137.06  567.85
   3 -17  -8  517.19  280.04
  -3 -17   8 1899.21  414.22
   3 -17  -7 4236.37  886.58
  -3 -17   7 2613.32 1010.23
   3 -17  -6  417.02  243.69
  -3 -17   6  241.40  469.51
   3 -17  -5 2065.25  483.13
   3 -17  -4  992.52  712.34
  -3 -17   4  165.24  443.35
   3 -17  -3 4878.99  950.37
  -3 -17   3 5579.06 1019.06
   3 -17  -2  787.61  694.23
  -3 -17   2  485.89  377.64
   3 -17  -1 7271.76 1483.70
  -3 -17   1 8137.29  866.36
   3 -17   0 1390.33  489.90
  -3 -17   0  488.51  385.43
   3 -17   1 3928.21 1410.55
  -3 -17  -1 5005.78 1776.54
   3 -17   2  458.65  632.59
  -3 -17  -2  522.69  351.59
   3 -17   3 4685.74 1293.73
  -3 -17  -3 5165.89 1293.33
  -3 -17  -4   47.37  222.75
   3 -17   4 1450.95  780.07
   3 -17   5 9335.12  715.59
  -3 -17  -5 8717.46  578.28
  -3 -17  -6  773.51  520.12
   3 -17   6  105.82  260.04
   3 -17   7 2092.13  664.52
   3 -18  -8  791.05  436.98
   3 -18  -7 3481.44 1014.39
   3 -18  -6  480.15  310.46
   3 -18  -5  607.32  528.30
   3 -18  -4 1854.25  330.61
  -3 -18   4  905.35  653.53
   3 -18  -3  982.34  624.98
  -3 -18   3 1988.13  842.70
   3 -18  -2 3405.54 1049.99
  -3 -18   2 4857.11 1639.22
   3 -18  -1  115.43  212.83
  -3 -18   1  832.17  380.63
   3 -18   0  653.05  510.71
  -3 -18   0  566.57  405.59
   3 -18   1  331.75  320.98
  -3 -18  -1 1267.95 1062.33
   3 -18   2  331.68  570.64
  -3 -18  -2 2511.41  783.10
   3 -18   3 3547.81 1079.74
  -3 -18  -3 6379.94 1435.98
  -3 -18  -4  974.08  468.37
  -3 -18  -5  169.34  193.96
  -3 -18  -6 2789.82 1158.99
  -3 -19  -1  931.42  445.69
  -3 -19  -3  292.26  287.44
  -3 -19  -4 6248.88 1325.37
  -4   0  20 1335.58  645.52
  -4   0  19  326.12  180.11
  -4   0  18 4441.36  781.31
  -4   0  17  292.55  308.88
  -4   0  17   83.43  161.15
  -4   0  16 3999.98  453.44
  -4   0  16 3909.22  423.73
  -4   0  15  162.48  185.11
  -4   0  15  -93.93  133.82
  -4   0  14  927.27  365.46
  -4   0  14 1607.93  369.86
  -4   0  13  337.26  217.89
  -4   0  13  -15.50  114.39
  -4   0  12 3942.22 1347.92
  -4   0  12 3418.49  338.42
  -4   0  11   86.61  102.60
  -4   0  11  160.11  116.20
  -4   0  1017183.18 1063.23
   4   0  -9  119.20  340.98
  -4   0   9  453.63  224.94
   4   0  -813068.73 1246.28
  -4   0   812356.32  738.17
   4   0  -7  331.86  149.86
  -4   0   7  523.68  238.77
   4   0  -671246.82 2287.39
  -4   0   671141.56 2231.10
   4   0  -5   97.87  209.68
  -4   0   5  147.52  148.34
   4   0  -5  188.09  120.15
   4   0  -415646.90  909.82
  -4   0   415133.18  851.69
  -4   0   415147.11  842.95
   4   0  -414300.42  817.53
   4   0  -3   65.90  263.63
  -4   0   3  127.98  134.88
   4   0  -3  270.08  189.24
   4   0  -269731.99 1658.78
  -4   0   262670.33 1491.22
   4   0  -1  123.09  126.96
  -4   0   1  -30.71  135.95
  -4   0   1  189.84  102.46
   4   0  -1  187.19  183.20
   4   0   0 5219.38  366.29
  -4   0   0 4772.70  319.61
  -4   0   0 5051.83  326.94
   4   0   0 5022.42  314.50
   4   0   1   -3.79  182.72
  -4   0  -1  193.22  116.66
  -4   0  -1  120.34  165.31
   4   0   1   68.57   74.87
   4   0   219581.93  630.89
  -4   0  -218090.50  542.48
  -4   0  -219328.76  522.69
  -4   0  -219467.45  619.23
   4   0   3 -109.77  198.81
  -4   0  -3   91.36  184.53
  -4   0  -3  -30.56   69.68
   4   0   4  688.93  252.27
  -4   0  -4  196.25   69.44
  -4   0  -4  256.63   90.65
   4   0   5  293.40  194.85
  -4   0  -5   45.50   26.85
  -4   0  -5  115.98   70.62
   4   0   6 7258.96  579.90
  -4   0  -6 9004.00  551.46
  -4   0  -6 9648.22  594.06
   4   0   7  375.03  343.38
   4   0   8 4759.37  574.35
   4   0   9  321.71  189.73
   4   0  1035242.37 1981.02
   4   0  11  486.94  183.91
   4   0  12 4962.16  663.09
   4   0  13  535.10  208.31
   4   0  1419588.87 1702.54
   4   0  15  440.07  334.94
   4   0  16  503.79  299.08
   4   0  18 1588.07  471.24
   4   0  19  158.17  337.48
  -4   1  20  678.94  497.00
  -4  -1  20  937.75  578.28
  -4  -1  19  356.13  253.87
  -4   1  19  237.31  224.73
  -4  -1  18 1015.31  867.46
  -4   1  18  525.87  602.87
  -4  -1  17 9653.12 1753.01
  -4   1  1711863.52 1003.21
  -4  -1  17 8740.72  775.54
  -4   1  16 9836.74  517.08
  -4  -1  1610750.23 1387.34
  -4  -1  1610898.52  974.28
  -4   1  1612013.73 1203.60
  -4  -1  15  677.05  240.25
  -4   1  15  484.56  371.20
  -4  -1  15  226.80  222.20
  -4   1  15  142.33  250.66
  -4   1  14 4620.55  475.21
  -4  -1  14 3499.08 1142.84
  -4  -1  14 3361.82  779.67
  -4   1  14 4122.67  520.75
  -4  -1  13 2267.64  608.70
  -4   1  13 2417.78  616.63
  -4  -1  13 2593.40  544.42
  -4   1  13 2187.63  537.21
  -4  -1  12 3175.65  682.81
  -4   1  12 3483.92  617.85
  -4  -1  12 4019.70  408.01
  -4   1  12 4158.31  853.41
  -4  -1  11 1614.17  588.81
  -4   1  11 1036.05  235.25
  -4  -1  11 1000.68  322.93
  -4   1  11  707.87  340.80
  -4  -1  10 7783.52  670.64
  -4  -1  10 6353.22  548.53
  -4   1  10 8046.70  744.91
   4   1  -912343.67  884.61
  -4  -1   913269.11  876.58
  -4   1   913456.24  868.41
   4   1  -8 8855.76  893.73
  -4  -1   8 9004.90  660.09
  -4   1   8 8566.55  621.28
   4   1  -7 1443.22  381.46
   4  -1  -7 1119.77  293.41
  -4  -1   7 1330.19  321.82
  -4   1   7 1103.49  576.50
   4   1  -6  170.13  288.17
   4  -1  -6   99.81  150.59
  -4  -1   6   65.39  221.42
  -4   1   6  256.70  223.99
   4   1  -539290.79 1349.31
   4  -1  -540546.56 1370.38
  -4  -1   540131.81 1334.31
  -4   1   540541.50 1422.55
   4   1  -438267.89 1119.66
  -4  -1   435995.78 1175.48
  -4   1   437643.88 1001.62
  -4  -1   439196.86 1312.57
   4   1  -435625.19  942.05
  -4   1   437138.30 1095.36
   4  -1  -437685.13  959.01
   4   1  -3 3306.07  356.98
   4  -1  -3 3352.79  402.83
  -4  -1   3 3707.14  312.98
  -4   1   3 2538.96  214.11
  -4  -1   3 2832.90  298.09
   4   1  -3 3131.35  511.75
  -4   1   3 3206.80  308.87
   4  -1  -3 3432.52  275.63
   4   1  -2 4270.01  359.50
   4  -1  -2 3670.08  361.58
  -4  -1   2 3236.91  254.19
  -4   1   2 2538.03  715.06
  -4  -1   2 3782.13  673.89
   4   1  -2 3822.03  313.34
  -4   1   2 3207.00  299.24
   4  -1  -2 3385.45  268.16
   4   1  -144187.09 1092.84
   4  -1  -142443.33 1076.71
  -4  -1   139717.71  980.86
  -4   1   139833.12 1053.91
   4   1  -143907.63 1064.37
  -4   1   143294.07 1060.13
   4  -1  -141457.58 1144.00
   4   1   038601.45  961.68
   4  -1   042189.94 1083.24
  -4  -1   037094.40  922.95
  -4   1   040930.39 1016.44
  -4  -1   039924.88  993.33
   4   1   037250.60  907.37
  -4   1   038516.50  992.17
   4  -1   121759.38  668.54
  -4   1  -122084.44  647.47
  -4   1  -123211.13  622.98
  -4  -1  -122032.93  580.41
   4   1   122869.91  601.89
   4  -1   268268.89 1663.86
   4   1   262723.33 1539.51
  -4  -1  -261709.04 1462.23
  -4   1  -261851.80 1526.43
  -4   1  -260461.69 1434.28
  -4  -1  -263157.33 1440.90
   4   1   266208.54 1503.73
  -4   1  -263927.84 1469.47
   4   1   354000.69 1698.33
   4  -1   355138.71 1744.06
  -4  -1  -352332.44 1582.05
   4   1   352507.02 1574.39
  -4   1  -352522.40 1617.55
   4  -1   448180.21 1608.00
  -4  -1  -445288.02 1441.39
   4  -1   448863.07 1529.80
  -4  -1  -448291.23 1456.85
   4   1   5 2384.70  339.00
   4  -1   5 2772.79  995.54
   4  -1   5 2987.83  313.37
   4  -1   6  452.24  210.55
   4   1   6  519.52  200.17
   4  -1   6  411.63   75.69
  -4   1  -6   66.66   88.65
   4   1   718962.29  612.89
   4  -1   717965.87 1138.57
   4  -1   719760.24  711.36
  -4   1  -718023.39 1024.00
   4   1   8 3542.06  466.59
   4  -1   8 2590.23  995.08
   4  -1   8 2774.74  154.72
  -4   1  -8 3749.08  360.92
   4  -1   9 4922.16 1055.27
   4   1   9 4867.94  932.43
   4  -1   9 4579.91  275.45
  -4   1  -9 4349.26  263.09
   4  -1  10   43.05  228.74
   4   1  10  276.06  228.96
  -4   1 -10    8.01   16.63
   4  -1  1110032.52 1039.97
   4   1  1114756.44 1110.20
   4  -1  13   64.35  200.10
   4   1  13  318.18  272.72
   4  -1  14  -30.98  183.56
   4   1  14  314.45  240.75
   4  -1  15 8097.65 1010.51
   4   1  15 9477.88  915.18
   4   1  16 6009.52  639.03
   4  -1  16 8756.00  982.46
   4   1  17  711.13  636.82
   4  -1  17 1003.07  602.61
   4   1  18  134.97  355.98
   4  -1  18  730.21  209.67
   4   1  19  519.83  418.28
  -4   2  20  242.36  400.23
  -4  -2  19 4391.27  593.77
  -4   2  19 2991.44  770.60
  -4  -2  18  522.10  343.95
  -4   2  18  142.55  307.18
  -4   2  17  148.18  210.47
  -4  -2  17  410.11  225.68
  -4  -2  16 1604.93  612.19
  -4   2  16 2225.69  502.54
  -4  -2  16 1248.81  476.89
  -4   2  16 2290.22  289.42
  -4  -2  1523099.83 1614.25
  -4   2  1518588.16 1634.14
  -4  -2  1520593.54 1380.93
  -4   2  1520845.31 1252.97
  -4  -2  14 2332.79  891.00
  -4   2  14 5446.60  925.07
  -4  -2  14 3015.48  340.01
  -4   2  14 3258.90  835.37
  -4   2  13 1031.96  750.71
  -4  -2  13 2297.02  502.24
  -4   2  13 1821.66  703.67
  -4   2  12  347.42  207.67
  -4  -2  12  800.06  366.56
  -4   2  12  525.17  349.92
  -4  -2  1137139.92 2126.24
  -4   2  1137940.06 2169.10
   4  -2 -10  -10.21  226.33
  -4  -2  10   32.50  112.90
  -4  -2  10  507.57  244.88
  -4   2  10  500.95  176.71
   4  -2  -9  585.44  445.55
  -4  -2   9  419.27  192.96
  -4  -2   9  828.68  314.50
  -4   2   9  629.41  376.23
   4   2  -8  471.66  264.82
   4  -2  -8  278.86  248.72
  -4  -2   8   20.46   91.52
  -4   2   8  451.08  280.52
   4   2  -728671.03 1068.28
   4  -2  -730426.56 1092.25
  -4  -2   731543.36 1087.69
  -4   2   731203.62 1283.09
   4   2  -6  281.72  241.36
   4  -2  -6  230.08  206.88
  -4  -2   6  415.57  247.23
  -4   2   6  243.35  177.42
   4   2  -5  384.40  290.15
   4  -2  -5  329.38  270.15
  -4  -2   5   42.46  109.97
  -4  -2   5  345.52  275.74
  -4   2   5  283.37  222.68
   4   2  -4 5781.61  516.98
   4  -2  -4 5684.41  477.20
  -4  -2   4 5264.28  484.90
  -4   2   4 6070.73  564.31
  -4  -2   4 5325.41  471.35
   4   2  -4 6110.63  474.92
  -4   2   4 6175.86  551.36
   4   2  -379818.16 1907.20
  -4  -2   375327.93 1747.73
   4  -2  -377125.21 1827.15
  -4   2   379416.45 1856.72
  -4   2   379480.92 1882.47
  -4  -2   382307.45 1970.04
   4   2  -379098.59 1850.94
   4   2  -2  246.08  170.03
  -4  -2   2   80.68   72.56
   4  -2  -2   98.42  121.16
  -4   2   2   74.62   93.45
  -4   2   2  209.16  201.17
  -4  -2   2  377.18  275.16
   4   2  -2  183.23  117.54
  -4   2   2  217.06  174.81
   4   2  -1 2806.86  362.73
   4  -2  -1 3628.29  969.87
  -4  -2   1 2517.23  250.51
  -4   2   1 1911.23  158.12
  -4   2   1 2626.39  432.77
  -4  -2   1 2282.45  177.97
   4   2  -1 2297.29  191.36
  -4   2   1 2301.16  208.01
   4   2   010631.14  592.22
   4  -2   010038.85  703.25
  -4  -2   0 9422.40  619.80
  -4   2   0 9389.33  535.45
  -4   2   0 9504.09  825.27
  -4  -2   0 9866.46  650.57
   4   2   0 9588.58  540.28
  -4  -2  -155096.79 1278.65
  -4   2  -157163.52 1378.39
  -4   2  -157041.21 1375.47
  -4  -2  -155382.29 1312.85
   4   2   224986.67  804.40
   4  -2   223986.24  729.79
  -4  -2  -225312.74  658.73
  -4   2  -224013.23  740.09
   4   2   224123.16  632.08
   4  -2   3  276.77  218.15
   4   2   3  638.08  188.46
  -4  -2  -3  397.82   96.44
   4  -2   3  161.46   61.86
  -4   2  -3  519.27  129.71
  -4  -2  -3  586.71  164.31
   4   2   3  123.71  145.03
   4  -2   4 5023.59  517.13
   4   2   4 4844.82  446.78
  -4  -2  -4 3417.94  312.76
   4  -2   4 4839.37  403.58
  -4   2  -4 4174.60  330.02
  -4  -2  -4 3679.00  286.93
   4   2   4 4324.58  319.54
   4  -2   525973.62  968.82
   4   2   530764.22 1020.46
   4  -2   530046.42  959.18
   4   2   6  745.98  262.60
   4  -2   6  608.35  448.95
   4  -2   6  324.67  227.29
   4  -2   7 2631.94  528.62
   4   2   7 2302.53  327.57
   4  -2   7 2083.92  304.10
   4   2   8 4234.35  548.02
   4  -2   8 5278.41  864.48
   4  -2   8 4026.03  447.47
  -4   2  -8 4556.16  491.81
   4  -2   916700.15  929.98
   4   2   916232.22  809.35
   4  -2   915775.98  688.14
  -4   2  -916053.18  688.27
   4  -2  10 2031.55  568.99
   4   2  10 1314.83  293.54
   4  -2  10  912.89  235.48
  -4   2 -10  970.11  229.17
   4  -2  11 7165.54  794.27
   4   2  11 7943.16 1177.35
   4  -2  11 6864.18  432.23
   4  -2  12  233.55  263.15
   4   2  12  357.76  245.12
   4  -2  13 9944.86  799.08
   4   2  13 8928.69  820.35
   4  -2  14  224.46  354.00
   4   2  14  164.39  161.09
   4  -2  15 1835.97  329.31
   4   2  15 4025.76  969.17
   4   2  16  252.72  329.44
   4  -2  16  324.72  458.33
   4   2  17 8688.61  670.61
   4  -2  1710342.23  772.24
   4   2  18  198.98  333.20
   4  -2  18  193.06  465.90
   4   2  19  606.46  332.49
  -4  -3  20 4759.76 1385.76
  -4   3  20 2926.17  759.40
  -4  -3  19  780.26  313.36
  -4   3  19   -6.20  219.02
  -4   3  18 2133.84  763.10
  -4   3  17 9049.88 1026.97
  -4  -3  17 8356.10  752.80
  -4   3  1611001.08  651.84
  -4  -3  1610439.84 1278.51
  -4   3  1610770.90 1301.28
  -4  -3  15  790.24  254.92
  -4   3  15  411.80  223.04
  -4  -3  15  231.86  188.26
  -4   3  15  124.69  161.65
  -4  -3  14 1475.82  607.77
  -4   3  14 2141.11  563.50
  -4  -3  14 1515.42  457.97
  -4   3  14 1735.59  652.50
  -4  -3  13 2190.35  678.41
  -4   3  13 2583.87  633.21
  -4  -3  13 1908.11  551.11
  -4   3  13 2065.73  715.75
  -4  -3  1225931.62 1526.44
  -4   3  1225746.53 1462.00
  -4  -3  1227322.61 1660.17
  -4   3  1228459.11 1614.22
   4  -3 -11 3811.80  899.57
  -4  -3  11 4462.00  717.67
  -4  -3  11 2134.56 1129.23
  -4   3  11 2726.29  290.00
   4  -3 -10 6817.32  619.66
  -4  -3  10 7173.83  494.82
  -4  -3  10 6011.62  614.31
  -4   3  10 5517.54  437.03
   4  -3  -9 5858.29  752.72
  -4  -3   9 5283.84  907.75
  -4  -3   9 6316.47  733.27
  -4   3   9 6677.20  641.29
   4  -3  -859845.40 2288.86
  -4  -3   862814.05  952.84
  -4  -3   861918.10 1024.42
  -4   3   859916.28 2234.11
   4   3  -7 2726.93  359.20
   4  -3  -7 4657.07  613.80
  -4  -3   7 5081.48 1321.31
  -4   3   7 3671.87  387.68
   4   3  -612358.24  780.31
   4  -3  -613078.07 1102.30
  -4  -3   611609.01  762.42
  -4   3   613263.28  793.74
   4   3  -5 6563.02  667.15
   4  -3  -5 5485.29  499.78
  -4  -3   5 5500.84  515.13
  -4   3   5 6732.22  938.97
   4   3  -438527.12 1296.06
  -4  -3   438624.63 1249.28
   4  -3  -434791.63 1183.01
  -4  -3   438718.56 1325.33
  -4   3   436123.22 1247.64
   4   3  -3 5018.74  418.97
  -4  -3   3 5436.17  415.91
   4  -3  -3 5458.27  470.89
  -4   3   3 5132.45  425.20
  -4   3   3 4496.18  383.36
  -4  -3   3 5626.88  708.46
   4   3  -3 5283.83  539.99
  -4   3   3 4856.50  423.86
   4   3  -2  209.53  187.59
  -4  -3   2  142.81   62.26
   4  -3  -2  160.29  231.74
  -4   3   2  268.02  154.02
   4  -3  -2  297.60  153.26
  -4   3   2  264.76  205.00
  -4  -3   2   82.01  111.04
   4   3  -2  151.09  230.19
   4   3  -1 2329.02  196.34
  -4  -3   1 2426.65  391.95
   4  -3  -1 2219.33  262.75
  -4   3   1 2421.86  239.28
   4  -3  -1 3631.36 1186.52
  -4   3   1 1807.96  332.00
  -4  -3   1 2619.76  796.63
   4   3  -1 1913.39  156.72
   4   3   019009.84  544.83
   4  -3   018925.38  622.07
  -4  -3   020879.82  550.94
  -4   3   018560.08  551.62
   4  -3   018804.19  689.76
  -4   3   019499.51  619.06
  -4  -3   020190.86  624.60
   4   3   019026.17  552.40
   4   3   1 2696.17  307.17
   4  -3   1 2316.66  270.28
  -4   3  -1 2459.85  173.04
  -4  -3  -1 2868.68  195.31
   4  -3   1 2557.64  238.41
  -4   3  -1 2384.65  233.62
  -4  -3  -1 3406.86  646.79
   4   3   1 2579.36  177.93
   4   3   211017.12  653.70
  -4  -3  -211003.81  603.41
   4  -3   211153.91  678.80
  -4   3  -210942.92  666.61
  -4  -3  -211731.43  648.70
   4   3   212159.92  723.98
   4   3   3   79.07   86.32
   4  -3   3  267.28  157.17
  -4  -3  -3  312.44  101.89
   4  -3   3   99.84  126.35
  -4   3  -3  135.33   57.32
  -4  -3  -3  326.20  132.61
   4   3   3  -27.83   81.05
   4  -3   456637.12 2076.77
   4   3   462182.25 1930.14
  -4  -3  -456253.19 1743.53
   4  -3   457316.15 1798.14
  -4   3  -463092.84 1971.60
  -4  -3  -460801.74 1883.49
   4   3   462145.72 1859.43
   4  -3   5 3354.13  837.53
   4   3   5 2256.29  226.88
  -4  -3  -5 2291.10  211.93
   4  -3   5 2383.33  278.63
  -4  -3  -5 2532.42  151.98
  -4   3  -5 2647.42  403.65
   4   3   5 2601.18  179.05
   4  -3   6  880.79  237.75
   4   3   6 1308.61  493.17
   4  -3   6 1503.23  540.66
  -4   3  -6 1345.29  290.78
   4  -3   7  150.34  209.29
   4   3   7  302.15  234.78
   4  -3   7   11.21  141.03
  -4   3  -7    1.68   60.29
   4  -3   826258.63 1222.43
   4   3   822213.00 1082.26
   4  -3   822713.01 1039.35
   4  -3   9 2817.31  375.22
   4   3   9 2338.49  630.78
   4  -3   9 1454.97  372.63
   4  -3  10 1722.27  736.90
   4   3  10 2250.34  285.27
   4  -3  10 1587.85  419.70
  -4   3 -10 1433.54  347.89
   4  -3  11 3279.34 1133.45
   4   3  11 2651.28  777.41
   4  -3  11 2292.41  347.16
   4  -3  1212000.77  835.98
   4   3  1211743.48 1190.50
   4  -3  13  821.11  566.26
   4   3  13  184.34  173.71
   4  -3  14  823.44  677.01
   4   3  14 1522.66  710.96
   4  -3  15   43.85  149.35
   4   3  15  329.57  215.40
   4   3  16 6760.63  555.19
   4  -3  16 7033.12 1879.86
   4  -3  17  629.35  342.60
   4   3  17  863.16  245.32
   4   3  18  117.67  309.86
   4  -3  18  132.87  166.95
   4   3  19  856.84  419.70
  -4  -4  20 1829.34  328.26
  -4   4  20  534.78  293.47
  -4  -4  19 1169.71  501.20
  -4   4  19  960.62  424.09
  -4  -4  18 3792.23 1255.86
  -4   4  18 3633.36  661.99
  -4  -4  17  149.83  249.13
  -4   4  17  557.47  171.46
  -4  -4  17  559.75  371.23
  -4  -4  16  531.15  491.13
  -4   4  16  443.31  206.27
  -4  -4  16  382.53  172.22
  -4   4  16  264.10  211.47
  -4  -4  15 4676.61 1573.27
  -4   4  15 4667.85  375.04
  -4  -4  15 4434.08  548.75
  -4   4  15 4720.99  653.39
  -4  -4  14  271.96  161.60
  -4   4  14  480.53  237.11
  -4  -4  14  666.79  486.86
  -4   4  14  654.41  280.79
  -4  -4  13  159.87  354.75
  -4   4  13  362.98  396.72
  -4  -4  13  491.95  354.25
  -4   4  13  141.47  115.85
  -4  -4  12 2862.34 1178.97
  -4   4  12 2193.95  541.10
  -4  -4  12 2189.76  794.54
  -4   4  12 2204.56  273.99
   4  -4 -11 7523.69 1236.00
  -4  -4  11 9188.32  784.77
  -4  -4  11 8397.80  741.99
  -4   4  1110137.82 1303.53
   4  -4 -1018055.68 1235.10
  -4  -4  1018141.21 1252.21
  -4  -4  1017813.66  995.85
  -4   4  1020504.70 1040.18
   4  -4  -9 7796.52  756.94
  -4  -4   9 7659.63  848.34
  -4  -4   9 9370.27  814.22
  -4   4   9 7331.20  640.89
   4  -4  -8 7438.63  745.77
  -4  -4   8 6890.06  958.69
  -4  -4   8 8200.98  806.61
  -4   4   8 8609.65  631.73
   4  -4  -7  361.55  221.17
  -4  -4   7  331.48  218.89
  -4  -4   7  526.25  224.35
  -4   4   7  -26.66  178.60
   4   4  -639377.58 1572.01
   4  -4  -642132.76 1430.58
  -4  -4   645116.01 1491.88
  -4   4   643375.15 1407.26
   4   4  -512679.06  765.33
   4  -4  -513167.80  785.83
  -4  -4   514330.89  885.53
  -4   4   511773.37  747.96
   4   4  -4 4023.51  627.26
  -4  -4   4 3890.84  361.24
   4  -4  -4 4704.37  706.21
  -4  -4   4 4489.45  466.37
  -4   4   4 4436.98  444.62
   4   4  -331359.33 1026.24
  -4  -4   331726.87 1023.88
   4  -4  -332036.01 1107.15
   4  -4  -333852.91 1174.97
  -4  -4   332473.23 1205.64
   4   4  -211916.83  680.63
  -4  -4   212047.44  798.06
   4  -4  -212064.47  728.01
  -4   4   211815.65  674.41
   4  -4  -212388.42  756.96
  -4  -4   212200.18  787.07
   4   4  -1 1329.90  157.73
   4  -4  -1 1629.34  416.01
  -4  -4   1 1252.29  261.96
  -4   4   1 1583.34  184.16
   4  -4  -1 1718.04  749.15
  -4  -4   1 1197.20  409.08
   4   4  -1 1072.09  596.29
   4   4   0  998.30  143.26
   4  -4   0  923.97  321.84
  -4   4   0  745.02  273.95
   4  -4   0 1117.60  513.94
  -4  -4   0 1536.07  472.84
   4   4   0  888.88  161.80
   4   4   1 4313.40  344.19
   4  -4   1 3915.99  393.42
   4  -4   1 3874.11  361.80
  -4   4  -1 3365.45  296.30
  -4  -4  -1 4154.97  375.27
   4   4   1 4246.72  332.02
   4   4   221869.66 1177.44
   4  -4   220236.04 1134.70
   4  -4   221028.10 1219.72
  -4  -4  -220393.95 1127.44
   4   4   221050.54 1129.16
   4   4   3   70.40   58.43
   4  -4   3   47.53  196.13
  -4  -4  -3  122.80   54.23
   4  -4   3  101.50  201.70
  -4   4  -3   85.19   71.30
  -4  -4  -3  150.46   77.75
   4   4   3  211.57   44.52
   4   4   417093.70  955.61
   4  -4   416906.10  970.58
  -4  -4  -416029.70 1006.90
   4  -4   416377.49  965.92
  -4   4  -415624.40  978.12
  -4  -4  -417120.93  968.45
   4   4   415874.22  871.60
   4   4   530223.95  998.67
   4  -4   530758.08 1359.00
  -4  -4  -529470.85  920.61
   4   4   529183.22  885.63
   4   4   645196.81 1748.53
   4  -4   647872.51 1781.44
  -4  -4  -646080.96 1602.29
   4   4   644437.74 1530.34
   4   4   7 5422.75  517.71
   4  -4   7 5283.32  732.41
   4   4   7 5789.22  482.07
   4  -4   8 8341.27  651.80
   4   4   8 7508.27  704.49
   4  -4   8 8270.83  734.05
   4  -4   9 2224.44  536.93
   4   4   9 2452.87  661.25
   4  -4   9 2126.61  365.01
   4  -4  1015057.24 1045.28
   4   4  1013724.18  849.60
   4  -4  1012945.06  742.12
   4  -4  11  130.33  156.62
   4   4  11   26.95  212.28
   4  -4  11  142.30   97.12
   4  -4  12 8807.43  845.83
   4   4  12 6855.51  706.67
   4  -4  13 1101.44  588.46
   4   4  13  645.88  296.12
   4  -4  14 5950.18 1335.08
   4   4  14 5163.30  573.40
   4  -4  15  534.05  429.76
   4   4  15  485.02  475.41
   4   4  16  673.99  284.94
   4  -4  16 1002.82  536.72
   4   4  17  383.48  529.74
   4  -4  17  265.47  521.81
   4  -4  18 4308.87 1437.20
   4   4  18 3421.73  508.03
   4   4  19  399.77  170.97
  -4   5  20  231.42  151.52
  -4  -5  19  453.04  225.96
  -4   5  19  644.68  220.24
  -4  -5  18  185.08  249.03
  -4   5  18  209.11  265.55
  -4  -5  17 6287.90  756.84
  -4   5  17 4919.75  802.81
  -4  -5  17 6546.08  964.94
  -4  -5  16  526.29  385.39
  -4   5  16  282.09  195.44
  -4  -5  16  143.99  207.30
  -4  -5  15  619.86  316.47
  -4   5  15  137.20  204.65
  -4  -5  15  297.56  268.55
  -4   5  15  336.21  121.55
  -4  -5  14 1098.18  432.96
  -4   5  14  221.75  163.17
  -4  -5  14  289.24  360.93
  -4   5  14  188.62  101.80
  -4  -5  1319021.15 1166.16
  -4   5  1314278.23  881.95
  -4  -5  1314852.08 1484.36
  -4   5  1314798.39  863.73
  -4  -5  12  822.28  334.31
  -4  -5  12  434.35  183.79
  -4   5  12  294.03  341.93
   4  -5 -11 1957.06  550.20
  -4  -5  11 1028.87  282.98
  -4  -5  11 1366.54  359.72
  -4   5  11 1306.56  516.36
   4  -5 -10 5535.23  873.52
  -4  -5  10 5004.50 1289.61
  -4  -5  10 4902.32  323.99
  -4   5  10 5116.27  609.08
   4  -5  -921914.01 1454.09
  -4  -5   924065.04 1115.94
  -4  -5   923253.78 1142.51
  -4   5   924462.82 1113.84
   4  -5  -8 1956.40  554.62
  -4  -5   8 1610.46  513.80
  -4  -5   8 1575.90  333.15
  -4   5   8 1304.26  204.19
   4  -5  -7  470.96  237.65
  -4  -5   7  783.17  252.67
  -4  -5   7  360.22  204.11
  -4   5   7   86.47  164.59
   4  -5  -6  292.31  271.75
  -4  -5   6  340.57  251.25
  -4  -5   6  537.16  141.67
  -4   5   6  317.72  145.66
   4  -5  -568906.82 2184.96
  -4  -5   569446.98 2153.54
  -4  -5   570787.22 2450.45
   4   5  -4  607.45  330.14
  -4  -5   4  440.51  161.07
   4  -5  -4  645.67  295.61
   4  -5  -4  805.88  245.19
  -4  -5   4  570.84  302.50
   4   5  -3 5740.98  527.65
  -4  -5   3 5523.65  452.71
   4  -5  -3 5060.21  454.05
   4  -5  -3 5777.55 1037.30
  -4  -5   3 5422.19  495.93
   4   5  -2 7166.86  534.12
   4  -5  -2 8012.54  600.36
   4  -5  -2 6987.79  602.76
  -4  -5   2 9356.59  643.12
   4   5  -1 9672.21  597.50
   4  -5  -1 9715.44  644.74
   4  -5  -1 9354.27  630.60
  -4  -5   110601.88 1143.27
   4   5   0 4257.87  314.12
   4  -5   0 3388.40  378.14
  -4  -5   0 2921.36  234.18
   4  -5   0 3713.88  948.09
  -4  -5   0 3630.99  592.14
   4   5   111107.56  620.22
   4  -5   1 9761.60  628.99
  -4  -5  -110014.38  539.68
   4  -5   111019.24  718.74
  -4  -5  -110190.72  629.12
   4   5   110749.77  617.78
   4   5   2  717.47  192.67
   4  -5   2  397.42  146.21
   4  -5   2  577.99  125.66
  -4  -5  -2  579.11  138.26
   4   5   2  430.81   65.09
   4   5   347391.54 1425.14
   4  -5   345210.78 1548.12
   4  -5   350264.06 1604.51
  -4  -5  -351907.14 1601.40
   4   5   345894.08 1401.21
   4   5   432026.36 1031.43
   4  -5   432338.75 1164.75
   4  -5   432963.73 1194.06
  -4  -5  -430884.28 1069.36
   4   5   428433.88  922.83
   4  -5   5 2557.93  422.13
   4   5   5 1911.60  293.62
  -4  -5  -5 1202.27  332.02
   4  -5   5 1606.30  179.22
  -4  -5  -5 1614.26  322.93
   4   5   5 1528.74  172.70
   4  -5   6 1355.07  306.25
   4   5   6 1286.48  353.21
  -4  -5  -6  657.17  230.97
   4  -5   6  729.56  199.86
  -4  -5  -6  844.56  239.80
   4   5   6 1316.73  273.12
   4  -5   715092.71 1069.75
   4   5   711889.89  803.62
  -4  -5  -713154.39  849.98
   4  -5   714289.10 1007.82
   4   5   714103.38  879.91
   4  -5   8 1775.07  552.87
   4   5   8 1596.35  471.65
   4  -5   8 1043.41  458.98
   4   5   8 1132.03  138.23
   4  -5   9 6866.56 1297.74
   4   5   9 3723.92  445.48
   4  -5   9 5640.00  802.09
   4   5  10  776.79  294.24
   4  -5  10  325.86  315.19
   4   5  1123834.73 1302.87
   4  -5  1124109.34 1253.99
   4  -5  12  900.63  389.08
   4   5  12  972.14  371.00
   4  -5  12  914.80  401.58
   4  -5  13 2205.95  313.70
   4   5  13 1163.42  329.46
   4  -5  14  644.32  509.53
   4   5  14  759.00  328.82
   4  -5  15 3464.95 1081.83
   4   5  15 3847.75  527.36
   4  -5  16 1093.46  840.81
   4   5  16 1852.27  786.74
   4  -5  17  327.09  170.17
   4   5  17   30.17  252.28
   4   5  18  735.01  304.83
   4   5  19 1400.01  529.73
  -4   6  20   25.15  227.09
  -4  -6  19 1547.73  623.35
  -4   6  19 1877.94  750.29
  -4  -6  18 1538.53  404.21
  -4   6  18  753.89  326.74
  -4  -6  17  703.22  234.18
  -4   6  17  160.31  269.92
  -4  -6  17  -74.00  117.14
  -4  -6  16 1238.64  271.81
  -4   6  16 1411.13  387.49
  -4  -6  16  474.31  181.45
  -4  -6  15 9127.39  666.47
  -4   6  15 9572.04  874.81
  -4  -6  15 9393.59  901.49
  -4   6  15 8011.48  515.38
  -4  -6  14 6836.10 1202.68
  -4   6  14 4704.95 1158.68
  -4  -6  14 5183.60  471.29
  -4   6  14 4208.41  566.45
  -4  -6  13  220.08  181.72
  -4   6  13  741.55  265.89
  -4  -6  13  721.80  305.91
  -4   6  13  502.44  391.14
  -4  -6  12 9003.51 1261.92
  -4  -6  12 9013.97  802.35
  -4   6  12 8682.84  828.97
   4  -6 -1118017.13 1152.09
  -4  -6  1119449.17 1224.86
  -4  -6  1120122.83 1555.70
  -4   6  1119945.57 1513.72
   4  -6 -10  197.84  189.40
  -4  -6  10  288.98  258.51
  -4   6  10  285.94  166.21
   4  -6  -9  728.83  205.51
  -4  -6   9 1093.55  283.65
  -4  -6   9 1436.51  465.91
  -4   6   9  933.65  218.01
   4  -6  -8  886.79  274.97
  -4  -6   8  527.51  295.74
  -4  -6   8  899.50  465.21
  -4   6   8 1304.65  345.50
   4  -6  -710484.39  738.28
  -4  -6   7 9243.28  701.53
  -4  -6   7 9997.04  718.34
  -4   6   7 9932.20  725.58
   4  -6  -6 8069.68  753.92
  -4  -6   6 8790.19  708.63
  -4  -6   6 9290.72  770.79
   4  -6  -5  737.70  361.08
  -4  -6   5 1399.69  219.01
   4  -6  -5 1474.31  358.06
  -4  -6   5 1145.12  330.09
  -4  -6   4  816.95  190.89
   4  -6  -4  865.04  360.66
  -4  -6   4  798.91  423.24
   4  -6  -4  977.86  309.82
  -4  -6   4 2001.47  644.23
  -4  -6   330043.52  956.11
   4  -6  -330711.67 1015.25
  -4  -6   333534.39 1097.58
   4  -6  -242537.88 1347.53
   4  -6  -241947.81 1438.10
  -4  -6   241484.09 1444.61
   4   6  -1 4208.69  332.41
  -4  -6   1 4089.80  325.84
   4  -6  -1 4889.68  461.06
   4  -6  -1 4383.10 1294.65
  -4  -6   1 4051.77  405.05
   4  -6   0  999.38  278.10
  -4  -6   0  663.32  140.09
   4  -6   0  413.27   76.08
   4   6   135569.86 1045.24
   4  -6   137464.96 1226.35
  -4  -6  -135015.44 1019.13
   4  -6   135983.38 1253.47
  -4  -6  -134659.41 1200.21
   4   6   212624.72  687.12
   4  -6   214181.79  858.69
  -4  -6  -211680.03  206.59
   4  -6   212631.47  813.87
   4   6   311005.36  710.97
   4  -6   311410.28  490.00
  -4  -6  -311673.80  209.82
   4  -6   310958.35 1056.98
  -4  -6  -311559.59  388.40
   4   6   415551.99  914.29
   4  -6   415877.74 1016.18
   4  -6   414829.69 1035.17
  -4  -6  -415965.39 1000.43
   4   6   416465.67  967.40
   4   6   522866.27  874.19
   4  -6   521402.00  933.57
  -4  -6  -520850.68  859.86
   4   6   519115.77  730.31
   4  -6   6 9411.01 1091.00
   4   6   6 8627.57  840.52
  -4  -6  -6 9733.21  975.10
  -4  -6  -6 8782.01  631.68
   4  -6   6 8109.45  735.26
   4   6   6 8170.67  545.89
   4  -6   7  487.69  283.62
   4   6   7  534.52  244.47
  -4  -6  -7  288.99  112.70
   4  -6   7  393.61  198.30
   4   6   7  140.67   61.21
   4  -6   8 3228.68  959.04
   4   6   8 2302.81  296.07
  -4  -6  -8 2497.50  323.01
   4  -6   8 3011.19  362.14
   4   6   8 2017.29  163.49
   4  -6   917706.50 1124.97
   4   6   915208.79  876.63
   4  -6   915350.42 1447.64
   4   6   916162.39  826.49
   4  -6  10 7917.24  739.24
   4   6  10 9095.65  823.39
   4  -6  10 6988.81 1082.82
   4  -6  11 2283.58 1382.64
   4   6  11 1658.55  491.13
   4  -6  11 1492.96  589.36
   4  -6  12  308.49  228.65
   4   6  12  903.51  437.77
   4  -6  12  903.36  174.11
   4  -6  13  681.74  375.00
   4   6  13  849.99  397.82
   4  -6  14 4172.60  705.99
   4   6  14 3612.53 1066.48
   4   6  15 1209.22  263.22
   4   6  16  348.48  242.86
   4   6  17 3445.98  790.70
  -4   7  20 3184.15  797.25
  -4  -7  19   57.34  284.34
  -4   7  19  657.93  346.53
  -4  -7  18 1152.77  831.38
  -4   7  18 1590.57  987.11
  -4  -7  17  486.82  294.33
  -4   7  17  830.37  312.72
  -4  -7  17  254.08  421.58
  -4  -7  16 5715.28 1609.51
  -4   7  16 8766.25  974.34
  -4  -7  16 6480.12  562.00
  -4  -7  15   89.04  256.35
  -4   7  15  897.60  480.80
  -4  -7  15  284.68  374.40
  -4   7  15  410.17  302.13
  -4  -7  14 6251.44 1214.33
  -4   7  14 5063.34  400.16
  -4  -7  14 3315.65 1249.24
  -4   7  14 4067.50  427.70
  -4  -7  13  942.65  541.36
  -4   7  13  654.24  383.68
  -4  -7  13  597.82  233.21
  -4   7  13  314.96  264.64
  -4  -7  1218683.51 1255.04
  -4  -7  1219607.53 1259.12
  -4   7  1219471.95 1154.44
   4  -7 -11  150.99   94.47
  -4  -7  11  554.48  176.40
  -4  -7  11  240.61  248.74
  -4   7  11  248.41  143.34
   4  -7 -10 3241.59  729.03
  -4  -7  10 2825.25  409.85
  -4  -7  10 1587.43  574.39
  -4   7  10 3553.16  338.25
   4  -7  -9  359.34  222.81
  -4  -7   9  171.28  232.23
  -4  -7   9  520.41  448.61
  -4   7   9  501.13  149.18
   4  -7  -824604.95 1430.67
  -4  -7   824310.87 1419.75
  -4  -7   824933.91 1606.80
  -4   7   826548.15 1564.59
   4  -7  -7 1513.93  370.91
  -4  -7   7 1245.60  194.64
  -4  -7   7 3254.83  689.61
   4  -7  -613127.76  887.32
  -4  -7   612871.69  890.34
   4  -7  -612282.18  968.07
  -4  -7   610777.56  994.94
   4  -7  -5  172.76  101.61
  -4  -7   5  100.49  125.36
   4  -7  -5  134.91  187.98
  -4  -7   5  275.38  230.88
  -4  -7   422663.01  868.23
   4  -7  -423612.88 1063.82
  -4  -7   422528.63  853.12
   4  -7  -422915.20 1038.86
  -4  -7   424560.89 1111.96
   4  -7  -3 3135.48  230.89
  -4  -7   3 3408.80  207.59
  -4  -7   3 3073.78  593.75
  -4  -7   213869.18  745.55
   4  -7  -214517.20  844.18
  -4  -7   213185.75  736.10
   4  -7  -214785.45  940.99
  -4  -7   213586.64  876.26
   4  -7  -1  350.75  202.16
  -4  -7   1  265.96  104.64
  -4  -7   1  382.43   94.27
   4  -7  -1  308.99  300.17
  -4  -7   1  489.50  252.63
   4  -7   044523.92 1440.54
   4  -7   041584.66 1546.24
  -4  -7   046802.36 1601.61
   4  -7   1  233.46  190.32
   4  -7   1  273.68  307.85
  -4  -7  -1  487.16  143.93
   4  -7   2 4136.70  428.86
   4  -7   2 4844.78  626.92
  -4  -7  -2 6888.22  988.82
   4   7   3 4357.70  370.16
   4   7   3 4721.28  409.10
   4  -7   3 5948.61  591.26
   4  -7   3 3770.35  417.57
  -4  -7  -3 3816.31  546.96
   4   7   417597.75 1007.20
   4   7   416804.87  975.37
   4  -7   417318.89 1174.58
   4  -7   416680.01 1266.21
  -4  -7  -419864.42  847.20
   4   7   5  -11.60   35.93
   4  -7   5   97.85  125.37
   4   7   5  206.24   78.82
   4  -7   5  218.21  186.29
  -4  -7  -5  160.12  110.19
   4   7   6 1429.89  433.13
   4  -7   6 2364.03  921.94
   4   7   6 3274.14  371.11
  -4  -7  -6 2501.19  408.98
   4  -7   6 2093.60  414.50
   4   7   6 2757.01  418.87
   4  -7   7  190.84  200.35
   4   7   7   63.18  114.62
  -4  -7  -7   73.09  131.05
   4  -7   7   65.39  207.83
   4   7   7   36.80   54.07
   4  -7   831633.75 1849.44
   4   7   825634.09 1447.10
  -4  -7  -825217.46 1359.43
   4  -7   827319.24 1591.56
   4  -7   9 1565.22  401.39
   4   7   9 1630.76  452.59
  -4  -7  -9  983.87  255.37
   4  -7   9  864.60  386.01
   4  -7  10  218.95  315.67
   4   7  10   69.99   56.13
   4  -7  10  154.09  142.91
   4  -7  11  620.62  387.34
   4   7  11  157.39  206.56
   4  -7  11  126.02  190.13
   4  -7  1212252.97 1622.95
   4   7  1213913.92 1237.33
   4  -7  1212595.00 1144.58
   4  -7  13  139.28  365.55
   4   7  13  102.19  181.67
   4  -7  14 2390.71  716.33
   4   7  14 1691.54  953.81
   4  -7  15  642.90  450.57
   4   7  15  164.06  141.85
   4  -7  1612364.14 1344.07
   4  -7  17 1817.39  650.42
  -4   8  19 2334.08 1120.04
  -4  -8  18 1911.56  625.89
  -4   8  18  704.79  891.62
  -4  -8  17  368.06  384.92
  -4   8  17 1164.82  222.65
  -4  -8  17 1038.18  363.48
  -4  -8  16 1213.82  561.17
  -4   8  16  916.89  338.83
  -4  -8  16  452.58  344.17
  -4  -8  1513419.36 1399.72
  -4   8  1512729.80 1322.77
  -4  -8  1510118.19 1512.61
  -4  -8  14 4255.64 1234.17
  -4   8  14 6083.50  493.05
  -4  -8  14 4770.83 1282.41
  -4   8  14 5209.20  746.18
  -4  -8  13  813.49  449.09
  -4   8  13 1342.81  372.55
  -4  -8  13 2086.96  702.62
  -4   8  13 1180.05  454.45
  -4  -8  12 2929.90 1001.18
  -4  -8  12 3514.92  899.10
  -4   8  12 2696.16  588.71
   4  -8 -1110035.77  878.37
  -4  -8  1111419.90  780.74
  -4  -8  1111195.73 1345.85
  -4   8  1111320.42 1263.83
   4  -8 -10 3555.94  533.26
  -4  -8  10 2854.29  925.77
  -4  -8  10 3048.65  669.31
  -4   8  10 2698.66  690.09
   4  -8  -910635.97  931.44
  -4  -8   9 8778.84  942.87
  -4  -8   9 9220.51 1005.33
  -4   8   912478.15 1137.83
   4  -8  -8 1829.61  653.96
  -4  -8   8 1790.73  586.29
  -4  -8   8 1135.77  306.62
  -4   8   8 1368.56  399.98
   4  -8  -711314.25  962.85
  -4  -8   713111.07 1055.31
   4  -8  -712448.45  892.42
  -4  -8   711847.13  860.17
   4  -8  -6 1005.39  271.88
  -4  -8   6 1445.88  360.25
   4  -8  -6 1641.23  673.93
  -4  -8   6 1504.05  744.81
   4  -8  -5 1620.87  383.95
  -4  -8   5 2556.53  328.04
   4  -8  -5 2444.21  978.73
  -4  -8   5 3299.31 1228.63
  -4  -8   4  655.95  197.84
   4  -8  -4  922.69  300.32
  -4  -8   4 1292.59  282.31
   4  -8  -4 1001.84  414.25
  -4  -8   4 1078.73  298.15
   4  -8  -340010.46 1520.69
  -4  -8   340884.50 1442.76
   4  -8  -337270.01 1516.81
  -4  -8   339194.31 1598.05
  -4  -8   212872.77  760.09
   4  -8  -213902.00  863.91
  -4  -8   212335.55  714.16
   4  -8  -214457.60  959.57
  -4  -8   213419.10 1003.26
   4  -8  -1  142.53  120.67
  -4  -8   1  140.93   38.13
  -4  -8   1   34.97   27.73
   4  -8  -1  353.84  409.55
  -4  -8   1  520.00  244.39
   4  -8   0 2143.52  270.49
   4  -8   0 2766.23  851.76
  -4  -8   0 2662.90 1063.64
   4  -8   116637.86 1027.46
   4  -8   114477.07 1044.55
  -4  -8  -116635.34 1072.40
   4  -8   2 6824.44  655.01
   4  -8   2 8424.63  508.57
  -4  -8  -2 7151.58  742.95
   4  -8   3 4276.08  623.10
   4  -8   3 4357.42  605.17
  -4  -8  -3 3633.07  396.22
   4   8   4 2152.59  153.71
   4   8   4 2422.69  111.66
   4  -8   4 2239.20  263.18
   4  -8   4 3798.24  651.32
  -4  -8  -4 2280.28  279.09
   4   8   512200.50  699.38
   4   8   511553.72  666.44
   4  -8   511338.99 1032.24
   4  -8   5 9956.97  723.45
  -4  -8  -512512.55  829.25
   4  -8   6  309.06  302.82
   4   8   6   52.03   59.71
  -4  -8  -6  244.79  212.97
   4  -8   6  396.45  205.50
   4  -8   710346.84  919.44
   4   8   7 8446.74  764.43
  -4  -8  -7 8536.22  711.21
   4  -8   7 8584.74  827.44
   4  -8   8 2705.55 1073.79
   4   8   8 2205.46  291.49
  -4  -8  -8 2340.28  493.95
   4  -8   8 2288.00  590.23
   4  -8   9 6544.68  786.07
   4   8   9 5559.29  659.74
  -4  -8  -9 4766.30  344.21
   4  -8   9 6160.25 1029.59
   4  -8  10 2217.85  608.45
   4   8  10 1334.65  301.58
   4  -8  10 1966.96  503.27
   4  -8  11 2261.23  657.13
   4   8  11 1408.28  352.12
   4  -8  11  998.46  448.25
   4  -8  12  359.53  377.45
   4   8  12  659.59  292.46
   4  -8  12  760.55  400.25
   4  -8  13 5330.24  989.53
   4  -8  14  636.79  401.42
   4  -8  15  582.82  334.60
   4  -8  16 1616.51  876.92
  -4  -9  18   51.12  193.65
  -4   9  18  300.89  213.77
  -4  -9  17 4372.78  831.22
  -4   9  17 3774.49  779.27
  -4  -9  17 3342.26  392.04
  -4  -9  16  112.55  293.12
  -4   9  16  112.99  164.38
  -4  -9  16  189.55  131.70
  -4  -9  15  951.38  405.64
  -4   9  15  327.56  285.33
  -4  -9  15 1747.97  523.07
  -4  -9  14  839.15  361.73
  -4   9  14  766.39  288.78
  -4  -9  14  645.58  406.51
  -4   9  14  286.79  332.49
  -4  -9  13 8464.39  559.36
  -4   9  13 8234.39  886.24
  -4  -9  13 7028.39 1004.54
  -4   9  13 7363.69  863.67
  -4  -9  12 2454.87  835.69
  -4  -9  12 2833.74  681.00
  -4   9  12 1869.12  675.50
   4  -9 -11  486.41  347.74
  -4  -9  11  107.82  138.56
  -4  -9  11    6.36  194.40
  -4   9  11   44.18  152.17
   4  -9 -10  187.15  308.05
  -4  -9  10  354.17  253.77
  -4  -9  10  312.04  274.78
  -4   9  10  332.17  163.03
   4  -9  -922205.88 1354.29
  -4  -9   921956.82 1442.74
  -4  -9   920534.70 1651.65
  -4   9   921091.64 1512.23
   4  -9  -8  960.91  312.09
  -4  -9   8  389.01  254.39
   4  -9  -8  759.52  336.77
  -4  -9   8  679.39  309.03
   4  -9  -7 1922.05  311.26
  -4  -9   7 1575.33  274.67
   4  -9  -7 2533.27  585.68
  -4  -9   7 2132.44  773.05
   4  -9  -6 7437.02  645.52
  -4  -9   6 8336.78  572.73
   4  -9  -6 6970.11  771.14
  -4  -9   6 7477.47  976.93
   4  -9  -524399.25 1618.38
  -4  -9   522047.20 1238.48
   4  -9  -520359.41 1341.57
  -4  -9   523655.63 1471.55
   4  -9  -4  131.10  137.08
  -4  -9   4  222.35   94.77
   4  -9  -4  403.28  280.18
  -4  -9   3 8260.33  579.90
   4  -9  -3 9967.67  710.24
  -4  -9   3 8386.30  606.40
   4  -9  -3 8300.24  760.11
  -4  -9   3 9103.57  834.41
   4  -9  -2 2434.44  370.38
  -4  -9   2 3147.84  232.58
  -4  -9   2 3660.05  273.40
  -4  -9   2 4579.55  501.49
   4  -9  -121059.82  940.37
   4  -9  -122339.21 1122.46
  -4  -9   120512.91 1113.70
   4  -9   0 2275.44  535.39
   4  -9   0 2358.91  658.72
  -4  -9   0 2920.77  766.85
   4  -9   1 3031.30  288.98
   4  -9   1 2917.19  384.83
  -4  -9  -1 2747.90  816.28
   4  -9   2  197.35  152.32
   4  -9   2   94.53  285.46
  -4  -9  -2 1076.46  347.27
   4  -9   321035.29 1250.30
   4  -9   320100.65 1238.08
  -4  -9  -319129.98 1122.00
   4  -9   4  100.93  132.23
   4  -9   4  256.84  376.41
  -4  -9  -4  723.82  319.26
   4   9   5  150.79   34.71
   4   9   5  239.78   48.42
   4  -9   5  594.59  134.79
   4  -9   5   59.40  180.76
  -4  -9  -5  116.22  204.09
   4   9   6  885.72  271.36
   4  -9   6 1812.31  763.42
  -4  -9  -6 1268.63  411.13
   4  -9   6 1854.08  463.15
   4   9   712584.90  320.12
   4  -9   712811.38  523.54
  -4  -9  -710875.55  758.75
   4  -9   712893.86 1249.32
   4  -9   8  667.40  248.16
   4   9   8  408.49  187.88
  -4  -9  -8  202.12  139.56
   4  -9   8  537.70  374.59
   4  -9   9 2283.48  354.41
  -4  -9  -9 1682.33  392.34
   4  -9   9 1677.96  715.17
   4  -9  10  633.63  240.24
   4  -9  10  257.29  164.79
   4  -9  1112955.08 1354.75
   4  -9  1112340.48 1184.93
   4  -9  12  596.75  534.24
   4  -9  12 1252.33  440.86
   4  -9  13 2551.13  861.08
   4  -9  14  148.13  316.83
   4  -9  15 7289.29 1981.56
   4  -9  16  938.55  284.31
  -4 -10  18  565.54  473.14
  -4 -10  17  165.21  250.95
  -4 -10  17   76.99  210.36
  -4 -10  16  627.78  293.33
  -4 -10  16 2141.48  340.92
  -4 -10  15 1505.34  507.34
  -4  10  15  755.93  156.82
  -4 -10  15 1390.90  519.74
  -4 -10  14 3619.34  425.22
  -4  10  14 3796.98  627.11
  -4 -10  14 2748.21  878.74
  -4  10  14 2221.41  520.15
  -4 -10  13 1088.86  912.70
  -4  10  13 2236.70  816.64
  -4 -10  13 1549.27  912.85
  -4  10  13 1739.80  473.33
  -4 -10  12 1849.94  841.60
  -4  10  12 2266.01  725.03
  -4 -10  12 2387.86  339.28
  -4  10  12 3364.52  762.35
   4 -10 -11 4374.69  658.74
  -4 -10  11 4068.26  679.55
  -4 -10  11 5300.12  642.54
  -4  10  11 4000.60 1163.48
   4 -10 -10 9788.90  526.14
  -4 -10  1011440.47  791.23
  -4 -10  1011158.85  895.64
  -4  10  1012071.50  801.59
   4 -10  -9  159.97  214.89
  -4 -10   9  534.83  280.88
  -4 -10   9  177.50  211.80
  -4  10   9  771.33  377.44
   4 -10  -8 2481.10  737.97
  -4 -10   8 2079.47  654.74
   4 -10  -8 2796.42 1007.72
  -4 -10   8 2754.29  863.40
   4 -10  -7  433.36  232.50
  -4 -10   7  129.38  105.29
   4 -10  -7  393.28  155.52
  -4 -10   7   36.73  230.11
   4 -10  -6 4515.90  384.84
  -4 -10   6 4771.58  276.41
   4 -10  -6 4698.17  809.75
  -4 -10   6 5571.21 1032.73
   4 -10  -5 2272.80  311.77
  -4 -10   5 2042.64  183.83
   4 -10  -5 2835.00 1348.21
  -4 -10   5 2778.85  761.50
   4 -10  -421394.31 1222.17
  -4 -10   421914.76 1157.35
   4 -10  -423009.17 1552.16
  -4 -10   314593.22  827.05
   4 -10  -314598.06 1004.00
  -4 -10   316142.03  268.66
   4 -10  -315274.98 1065.02
  -4 -10   316133.12  707.81
   4 -10  -225733.87 1508.86
  -4 -10   226762.46 1395.50
  -4 -10   226819.09 1395.41
  -4 -10   225664.31 1683.14
   4 -10  -1  674.45  192.23
   4 -10  -1  654.74  305.00
  -4 -10   1  479.53  365.14
   4 -10   0 3633.82  318.81
   4 -10   0 2750.92  668.10
  -4 -10   0 2667.21 1320.09
   4 -10   1 2393.05  221.64
   4 -10   1 2869.13  613.45
  -4 -10  -1 2611.23  468.94
   4 -10   2 6393.37  352.00
   4 -10   2 6662.73  701.99
  -4 -10  -2 7794.07  979.27
   4 -10   3   72.81  236.92
   4 -10   3  103.90  138.57
  -4 -10  -3   99.77  198.88
   4 -10   4 1919.85  512.01
   4 -10   4 2525.14  753.28
  -4 -10  -4 1351.36  583.03
   4 -10   5 5154.60  535.47
   4 -10   5 4831.70  556.30
  -4 -10  -5 6017.93  656.50
   4 -10   614644.50  907.36
  -4 -10  -612331.96  732.91
   4 -10   610550.09 1107.93
   4 -10   7  646.36  353.97
  -4 -10  -7  280.80  162.95
   4 -10   7  107.45  255.20
   4 -10   8 7929.07  634.26
  -4 -10  -8 6116.34  445.77
   4 -10   8 8938.54 1098.20
   4 -10   9 5711.35  575.23
   4 -10   9 5392.58  672.56
   4 -10  10 8827.31  570.54
   4 -10  1010866.09 1460.33
   4 -10  11  808.82  922.67
   4 -10  11 1156.28  470.39
   4 -10  12 1167.14  661.84
   4 -10  12 2036.16  735.86
   4 -10  13  141.98  427.91
   4 -10  14 4952.97  727.83
   4 -10  15  321.88  256.84
  -4 -11  17  950.69  990.20
  -4 -11  17 1294.66  859.35
  -4 -11  16  902.89  860.35
  -4 -11  16 1321.72  500.05
  -4 -11  15  197.99  176.43
  -4 -11  15  106.25  219.40
  -4 -11  14  670.93  384.78
  -4 -11  14  335.63  214.06
  -4 -11  13  621.80  306.91
  -4  11  13  542.14  246.19
  -4 -11  13  498.05  233.32
  -4  11  13  312.90  249.57
  -4 -11  12 8744.03 1058.33
  -4  11  1210121.13  824.06
  -4 -11  12 9615.55 1013.58
  -4  11  1211521.11  980.35
   4 -11 -11  107.72  208.00
  -4 -11  11  108.42  160.85
  -4 -11  11   -9.48  357.81
  -4  11  11  151.05  220.14
   4 -11 -10 4313.33  700.64
  -4 -11  10 4918.73  897.48
  -4 -11  10 2678.67  972.77
  -4  11  10 4172.88 1149.86
   4 -11  -9 6009.65  861.72
  -4 -11   9 5481.99  330.00
   4 -11  -9 5720.13 1417.57
  -4 -11   9 4533.64 1227.04
   4 -11  -814463.74 1049.22
  -4 -11   816389.95 1139.51
   4 -11  -815413.15 1303.62
  -4 -11   815782.92 1972.53
   4 -11  -7  955.76  402.54
  -4 -11   7  910.44  292.13
   4 -11  -7 1095.81  349.26
  -4 -11   7 2458.62  461.22
   4 -11  -6  995.77  556.20
  -4 -11   6  785.73  367.19
   4 -11  -6 1258.39  892.58
  -4 -11   6 1249.93  559.43
   4 -11  -5  562.68  126.19
  -4 -11   5  835.29  241.49
   4 -11  -5  825.01  526.51
  -4 -11   5  855.71  343.16
   4 -11  -417369.36 1066.06
  -4 -11   418141.72 1060.93
   4 -11  -420059.60 1296.65
  -4 -11   421356.01 1378.17
   4 -11  -3 2666.94  725.39
  -4 -11   3 2018.40  126.56
   4 -11  -3 2479.75  855.72
  -4 -11   3 2210.70  511.73
   4 -11  -2 1469.63  491.15
  -4 -11   2 2202.91  915.07
   4 -11  -1 3392.05  400.27
   4 -11  -1 3651.47  779.67
  -4 -11   1 2589.94  501.19
   4 -11   012110.49  473.54
   4 -11   010412.97  965.27
  -4 -11   011462.01 1044.92
   4 -11   1 1853.72  766.46
   4 -11   1 1496.52 1047.99
  -4 -11  -1 3057.47  731.47
   4 -11   2  344.47  307.83
   4 -11   2  923.33  400.69
  -4 -11  -2 1068.86  306.41
   4 -11   3 4328.04  419.38
   4 -11   3 5371.88 1445.35
  -4 -11  -3 5021.72  416.42
   4 -11   425055.26 1388.54
   4 -11   421113.14 1513.04
  -4 -11  -423666.89 1861.34
   4 -11   5 1431.81  642.27
   4 -11   5  724.58  793.18
  -4 -11  -5  999.40  342.12
   4 -11   6 1881.33  406.67
   4 -11   6 3126.90  961.13
  -4 -11  -6 1186.19  562.09
   4 -11   7 7149.10  474.13
  -4 -11  -7 6873.11  862.74
   4 -11   7 7189.44  968.09
   4 -11   816073.12 1662.51
  -4 -11  -818060.95 1551.59
   4 -11   815791.09 1526.55
   4 -11   9  292.77  263.77
   4 -11   9  642.66  317.50
   4 -11  10   54.38  142.74
   4 -11  10  253.68  201.76
   4 -11  11  409.34  359.44
   4 -11  11 1236.31  394.89
   4 -11  12 2834.93 1061.60
   4 -11  12 3222.54  907.86
   4 -11  13   79.28  222.91
   4 -11  14  668.47  263.35
   4 -11  15 1227.45  858.70
  -4 -12  17  227.70  755.77
  -4 -12  17  117.76  274.93
  -4 -12  16  401.53  265.39
  -4 -12  16  219.62  355.60
  -4 -12  15 5301.12  419.47
  -4 -12  15 2208.00 1009.75
  -4 -12  14  114.51  185.62
  -4 -12  14  284.52  232.77
  -4 -12  13  585.00  195.35
  -4 -12  13 1206.17  483.81
  -4  12  13  857.19  565.13
  -4 -12  12  395.51  185.93
  -4 -12  12 1259.06  668.65
  -4  12  12  291.95  282.82
  -4 -12  1118153.07  632.59
  -4 -12  1116432.40 1322.57
  -4  12  1116520.60 1980.63
   4 -12 -10  745.84  357.50
  -4 -12  10  509.91  132.70
  -4 -12  10  659.42  540.97
  -4  12  10  644.39  425.44
   4 -12  -9 1387.84  590.36
  -4 -12   9 1647.60  470.15
   4 -12  -9 1595.37  528.32
  -4 -12   9 1837.68  583.84
   4 -12  -8  -47.98  105.25
  -4 -12   8  312.31  152.81
   4 -12  -8  103.75  214.68
  -4 -12   8  416.35  206.88
   4 -12  -714957.29 1045.02
  -4 -12   714523.73  882.23
   4 -12  -715047.84 1109.02
  -4 -12   717085.43 1193.54
   4 -12  -6  682.70  178.60
  -4 -12   6  486.95  281.11
   4 -12  -6 1309.87  596.86
  -4 -12   6  162.73  348.44
   4 -12  -5 1572.37  467.70
  -4 -12   5  546.84  184.98
   4 -12  -5 1736.57  508.30
  -4 -12   5  451.75 1079.19
   4 -12  -4  171.20  172.65
   4 -12  -4  293.85  241.10
  -4 -12   4  277.91  219.04
   4 -12  -318347.22 1013.62
   4 -12  -319378.35 1237.09
  -4 -12   316240.49 1056.88
   4 -12  -2  728.43  259.42
   4 -12  -2  570.19  385.94
  -4 -12   2 1204.38  428.36
   4 -12  -1  209.01  175.35
   4 -12  -1  203.53  204.78
  -4 -12   1  514.94  340.69
   4 -12   0 1174.65  474.02
   4 -12   0  420.49  273.59
  -4 -12   0 1080.79  473.24
   4 -12   110455.39  400.83
   4 -12   112093.80  826.82
  -4 -12  -110837.35 1017.51
   4 -12   2 1149.45  584.69
   4 -12   2  455.98  254.13
  -4 -12  -2  934.50  427.04
   4 -12   3 3038.58  360.43
   4 -12   3 4097.83 1084.57
  -4 -12  -3 3161.17 1070.30
   4 -12   4  458.72  281.40
   4 -12   4  385.78  265.79
  -4 -12  -4  202.03  173.89
   4 -12   5 8730.14  590.86
   4 -12   5 9478.80  762.15
  -4 -12  -510117.21  636.42
   4 -12   6  518.80  297.04
   4 -12   6  604.58  616.09
  -4 -12  -6  883.98  215.34
   4 -12   7 6048.53  403.74
  -4 -12  -7 4606.09 1158.68
   4 -12   7 5800.15 1045.54
   4 -12   8  358.76  322.91
  -4 -12  -8  239.42  262.06
   4 -12   8  759.79  306.52
   4 -12   912035.60 1030.01
   4 -12   912224.31 1872.58
   4 -12  10  870.85  216.56
   4 -12  10  223.67  209.34
   4 -12  11 3385.27 1081.35
   4 -12  11 2727.39  913.41
   4 -12  12  422.41  332.58
   4 -12  12  654.15  182.84
   4 -12  13 5906.44 1277.86
   4 -12  14  224.99  342.96
  -4 -13  15   39.09  189.86
  -4 -13  14  462.99  495.38
  -4 -13  13 1749.10  950.57
  -4  13  13 1686.16  724.93
  -4 -13  12 2420.52 1492.26
  -4  13  12 3183.37  758.56
  -4 -13  11   70.67  313.07
  -4  13  11   95.49   78.98
  -4 -13  10  357.25  512.49
   4 -13  -9 6459.50  782.18
  -4 -13   9 6108.03 1844.54
   4 -13  -8 2700.80  812.62
  -4 -13   8 5916.66  674.95
   4 -13  -7  262.61  245.32
  -4 -13   7  445.09  424.39
   4 -13  -6 1870.99  584.60
   4 -13  -6 1783.96  535.00
  -4 -13   6 1273.97  481.97
   4 -13  -5 6661.52  449.21
   4 -13  -5 9423.82  778.60
   4 -13  -4 4838.97  414.10
   4 -13  -4 4938.48  632.51
  -4 -13   4 5155.70  861.50
   4 -13  -3 3456.78  274.10
   4 -13  -3 3316.62 1282.19
  -4 -13   3 4116.48  468.20
   4 -13  -2  890.53  420.96
   4 -13  -2 1177.36  434.77
  -4 -13   2  964.09  483.21
   4 -13  -1 6144.59  489.46
   4 -13  -1 7273.53 1881.63
  -4 -13   1 7302.03  928.57
   4 -13   0 9807.67  743.58
   4 -13   0 7109.53  685.40
  -4 -13   0 9177.63 1528.96
   4 -13   1  477.06  217.29
   4 -13   1  492.77  286.22
  -4 -13  -1 1132.21  439.44
   4 -13   2 8741.97  532.13
   4 -13   2 7487.86 1057.98
  -4 -13  -2 8087.24  589.49
   4 -13   3 7370.83  471.49
   4 -13   3 6716.62  701.88
  -4 -13  -3 6796.00 1629.18
   4 -13   4 7779.46  436.27
   4 -13   4 6335.75  960.58
  -4 -13  -4 9968.76  695.91
   4 -13   5  441.50  559.60
   4 -13   5  448.77  275.03
  -4 -13  -5  810.73  333.18
   4 -13   6  209.76  224.14
  -4 -13  -6   88.49  167.82
   4 -13   7 7292.06  664.81
  -4 -13  -7 5482.41  936.51
   4 -13   7 7599.40 1368.48
   4 -13   8 4464.50 1102.06
   4 -13   8 7637.46 1496.15
   4 -13   9  487.17  310.40
   4 -13  10   90.31  228.17
   4 -13  11 2104.93  863.86
   4 -13  11 2342.84  461.04
   4 -13  12 3915.76  473.58
   4 -13  12 2368.22  908.49
   4 -13  13  976.66  411.87
   4 -13  14  542.18  385.59
  -4 -14  14 3074.99 1543.56
  -4 -14  13  657.71  232.72
  -4 -14  12 2289.18 1614.26
  -4  14  12  834.85  699.82
  -4 -14  11  430.86  293.13
  -4  14  11  281.57  256.63
   4 -14 -10 4575.21 1318.76
  -4 -14  10 3596.95 1350.39
   4 -14  -9  671.97  364.62
  -4 -14   9  920.17  586.16
   4 -14  -8 4928.80 1553.34
  -4 -14   8 4453.13  491.14
   4 -14  -7  292.40  313.82
  -4 -14   7  915.30  276.14
   4 -14  -6 8890.19 1264.50
  -4 -14   6 8251.50  779.90
   4 -14  -5 1601.50  408.26
   4 -14  -4 2037.25  629.01
  -4 -14   4 2125.86 1043.27
   4 -14  -3  224.44  462.13
  -4 -14   3  518.89  444.92
   4 -14  -215689.78 1461.99
  -4 -14   215025.33 1780.48
   4 -14  -1   56.64   76.38
  -4 -14   1 1045.13  800.21
   4 -14   0 7004.60  389.31
   4 -14   0 6145.25 1551.69
  -4 -14   010464.84 1047.94
   4 -14   1 1096.12  426.76
   4 -14   1 1009.55  347.17
  -4 -14  -1 1316.76  614.54
   4 -14   2 6134.84  735.00
   4 -14   2 6419.76  531.78
  -4 -14  -2 7333.59  492.04
   4 -14   3  264.68  189.65
   4 -14   3  318.61  358.35
  -4 -14  -3  409.54  276.52
   4 -14   4  776.58  262.58
   4 -14   4  363.05  318.40
  -4 -14  -4 1211.65  324.62
   4 -14   5  405.80  209.90
   4 -14   5  504.08  264.17
  -4 -14  -5 1343.11  494.61
   4 -14   6 8077.92  857.82
  -4 -14  -6 7827.20  937.19
   4 -14   6 8789.40  979.52
   4 -14   7  302.36  190.88
  -4 -14  -7  229.35  156.17
   4 -14   7  568.24  304.51
   4 -14   8 5337.41  567.80
   4 -14   8 6048.91 1081.00
   4 -14   9  195.67  124.99
   4 -14   9  333.21  259.47
   4 -14  10 2932.73  551.91
   4 -14  10 4149.02  507.80
   4 -14  11  889.94  481.96
   4 -14  11  585.48  341.27
   4 -14  12  440.69  143.02
   4 -14  12  663.26  446.27
   4 -14  13  125.27  179.72
  -4 -15  12  232.35  495.53
  -4  15  12  864.28  595.75
  -4 -15  11  312.00  189.29
  -4  15  11  144.93  171.57
   4 -15 -10  158.95  209.39
  -4 -15  10   87.02  288.20
   4 -15  -9 4265.03 1324.66
  -4 -15   9 5256.96 1024.74
   4 -15  -8  329.44  251.18
  -4 -15   8  630.51  503.60
   4 -15  -7  532.93  347.29
  -4 -15   7  449.16  241.67
   4 -15  -6  697.49  539.42
  -4 -15   6  259.71  388.09
   4 -15  -5 3898.82 1450.58
  -4 -15   5 6455.13 1431.10
   4 -15  -4 2375.68  904.74
  -4 -15   4 2026.40  870.43
   4 -15  -3 2274.29  909.44
  -4 -15   3 2845.46  746.33
   4 -15  -2  764.47  428.96
  -4 -15   2  504.13  388.16
  -4 -15   112303.93 1165.32
   4 -15   0 8034.13 1055.57
  -4 -15   0 7281.94 1654.63
   4 -15   1  302.02  201.57
   4 -15   2  880.51  592.18
  -4 -15  -2  640.33  789.50
   4 -15   3 8372.56 1279.61
  -4 -15  -3 7944.09 2008.37
   4 -15   4 4681.75 1097.42
  -4 -15  -4 3955.34 1084.74
   4 -15   5 1863.37  548.38
  -4 -15  -5 1603.21  351.33
   4 -15   6  411.96  274.17
  -4 -15  -6  526.17  243.91
   4 -15   7 4196.22 1585.47
  -4 -15  -7 6234.03  951.74
   4 -15   7 7515.51 1827.27
   4 -15   8   93.84  206.28
   4 -15   8 1163.53  521.10
   4 -15   9  336.37  264.42
   4 -15   9  335.39  161.15
   4 -15  10  247.31  343.72
   4 -15  10  421.02  391.30
   4 -15  11 2879.71 1182.10
   4 -15  11 4465.90  882.82
   4 -15  12 1888.17  728.64
   4 -15  12 3658.15  774.21
  -4  16  11 3330.54 1062.94
   4 -16 -10  121.56  294.32
  -4 -16  10  959.31  535.83
   4 -16  -9  408.68  296.25
  -4 -16   9  994.59  625.62
   4 -16  -8  953.08  339.72
  -4 -16   8  832.51  682.33
   4 -16  -7 6776.61  985.06
  -4 -16   7 8468.80 1147.28
   4 -16  -6 2122.28 1062.25
  -4 -16   6 1037.62  611.85
   4 -16  -5 3028.56  849.80
  -4 -16   5 2480.54 1031.38
   4 -16  -4  475.29  393.36
  -4 -16   4  843.16  382.60
   4 -16  -3 3768.60 1218.86
  -4 -16   3 2498.32 1341.18
   4 -16  -2  358.34  295.48
  -4 -16   2  166.57  579.34
   4 -16  -1 2813.08  782.03
  -4 -16   1 2083.92 1235.02
   4 -16   0  238.43  627.54
  -4 -16   0 -305.51  241.12
   4 -16   1 9791.82 1024.38
  -4 -16  -111298.31 1160.07
   4 -16   2  785.08  518.93
  -4 -16  -2  496.88  239.16
   4 -16   3  931.44  626.56
  -4 -16  -3  849.83  469.17
   4 -16   4  267.49  227.93
  -4 -16  -4  386.79  259.66
  -4 -16  -5 3849.13 1194.02
   4 -16   5 4609.67  854.06
   4 -16   6  327.75  462.73
  -4 -16  -6  582.05  261.86
   4 -16   7 1475.36  652.39
   4 -16   8  950.67  464.01
   4 -16   9 4784.53 1428.00
   4 -16  10  652.10  284.19
   4 -17 -10  501.97  415.30
   4 -17  -9  564.18  337.41
   4 -17  -8 2080.43 1258.20
   4 -17  -7  931.38  440.08
  -4 -17   7  324.93  734.04
   4 -17  -6 2631.87 1163.61
   4 -17  -5  770.09  398.98
  -4 -17   5   29.26  353.25
   4 -17  -4 2963.17 1439.39
  -4 -17   4 4344.95  700.17
   4 -17  -3  680.81  323.78
  -4 -17   3  944.99  311.39
   4 -17  -2 6310.45 1641.28
  -4 -17   2 5119.82  978.44
   4 -17  -1 1384.70  405.28
  -4 -17   1 1068.93  482.53
  -4 -17   0 4098.87 1674.52
   4 -17   1  174.04  321.81
  -4 -17  -1  136.88  323.01
   4 -17   2  708.11  590.18
  -4 -17  -2 1362.47  457.17
   4 -17   3  238.12  339.34
  -4 -17  -3 1574.39  415.35
   4 -17   4 4325.75  931.88
  -4 -17  -4 7265.97  577.24
   4 -17   5 1038.69  313.69
  -4 -17  -5  449.22  204.44
   4 -17   6  148.33  142.62
  -4 -17  -6  282.15  214.64
   4 -17   7  854.80  266.82
   4 -18  -6 2183.66  692.64
   4 -18  -5  287.55  184.30
   4 -18  -4 1279.76  604.76
   4 -18  -3 2780.61 1130.01
  -4 -18   3 3010.93 1449.99
   4 -18  -2 4501.99 1775.96
  -4 -18   2 2239.92 1297.04
   4 -18  -1  127.18  308.94
  -4 -18   1  571.88  502.83
  -4 -18   0 2224.16  694.71
   4 -18   1 1769.65  710.85
  -4 -18  -1 3174.43 1057.50
  -4 -18  -2 6368.71 1361.51
  -4 -18  -3 1124.73  352.72
  -4 -18  -4 2078.65  775.48
  -4 -18  -5 3078.66 1192.12
  -5   0  20   84.14  284.77
  -5   0  19 2000.71 1058.48
  -5   0  18   91.76  282.66
  -5   0  17  265.15  202.99
  -5   0  17  196.76  213.62
  -5   0  16  163.71  208.07
  -5   0  16  276.80  121.73
  -5   0  1529494.68 1819.00
  -5   0  1529812.97  772.67
  -5   0  14  251.99  275.87
  -5   0  14  158.78  178.30
  -5   0  13 7226.52  771.71
  -5   0  13 6666.70  832.73
  -5   0  12  126.22  172.85
  -5   0  12  237.35  122.13
   5   0 -1114931.97 1035.89
  -5   0  1119075.15 1370.68
   5   0 -10  255.62  161.14
  -5   0  10  500.36  375.47
   5   0  -9 6068.40  688.44
  -5   0   9 8795.43 1027.20
   5   0  -8  323.56  204.86
  -5   0   8  145.03  149.75
   5   0  -795534.21 1414.02
  -5   0   791372.42 2811.90
   5   0  -6  241.00  126.12
  -5   0   6   94.37  139.30
   5   0  -543147.53 1510.89
  -5   0   539951.20 1353.21
   5   0  -4   12.24  190.68
  -5   0   4  238.01  178.56
   5   0  -344341.85 1449.81
  -5   0   345066.83 1431.89
  -5   0   339541.70 1310.63
   5   0  -338303.83 1241.14
   5   0  -2   87.23  213.56
  -5   0   2   98.73  141.30
  -5   0   2  140.98  193.07
   5   0  -2  136.07  122.19
   5   0  -113115.28  758.56
  -5   0   110257.20  632.22
  -5   0   112506.56  778.94
   5   0  -110923.20  700.51
   5   0   0  294.74  119.52
  -5   0   0  -10.77   96.06
  -5   0   0   50.96  120.51
   5   0   0   73.62  122.10
   5   0   1108837.7 3284.12
  -5   0  -1109998.2 3303.82
  -5   0  -1114907.0  956.02
   5   0   1111056.9 3337.06
   5   0   2  331.44  212.79
  -5   0  -2  -18.13   61.13
  -5   0  -2   98.16   79.76
   5   0   3 3761.63  464.20
  -5   0  -3 3184.82  268.99
   5   0   4  422.04  295.35
  -5   0  -4   61.46   85.78
   5   0   541865.24 1384.49
  -5   0  -547972.15 1420.38
  -5   0  -547446.21 1406.89
   5   0   6  309.14  215.32
  -5   0  -6   43.77   36.94
  -5   0  -6   -1.53   27.47
   5   0   7 1654.02  500.74
   5   0   8  257.24  185.84
   5   0   912989.20  886.74
   5   0  10  140.45  173.11
   5   0  11  677.79  292.77
   5   0  12   53.88  391.04
   5   0  1319045.59 1269.00
   5   0  14  221.35  199.56
   5   0  15  135.52  127.20
   5   0  16  303.96  301.25
   5   0  17 2687.59  466.39
   5   0  18  303.04  318.25
  -5  -1  20  623.19  193.47
  -5   1  20  913.44  246.55
  -5  -1  19 1264.87  394.75
  -5   1  19  138.19  673.75
  -5   1  18 1558.05  645.94
  -5  -1  18 2008.02 1089.81
  -5   1  17 4015.43  659.12
  -5  -1  17 2636.91 1172.40
  -5  -1  17 2900.94  594.47
  -5   1  17 3779.67  883.82
  -5  -1  16  574.27  272.13
  -5   1  16  958.96  304.58
  -5  -1  16 1739.01  336.55
  -5   1  16 1180.78  404.41
  -5  -1  15  304.36  187.19
  -5   1  15  107.07  365.39
  -5  -1  15  359.03  240.82
  -5   1  15  281.79  180.20
  -5   1  1413037.87 1162.12
  -5  -1  1413462.04 1144.77
  -5  -1  1413983.41 1238.27
  -5   1  1415523.71 1278.10
  -5  -1  13 4496.35 1274.20
  -5   1  13 4245.81 1103.14
  -5  -1  13 3788.28  731.35
  -5   1  13 5761.65  766.20
  -5  -1  12 1083.04  547.22
  -5  -1  12  707.36  258.42
  -5   1  12  517.69  260.30
  -5  -1  11 3864.26  454.76
  -5  -1  11 3370.74  261.46
  -5   1  11 3134.73  315.41
   5   1 -1013071.88 1069.99
  -5  -1  1016409.91 1233.04
  -5   1  1013702.97 1068.95
   5   1  -9 3077.58  879.86
   5  -1  -9 3992.28 1162.68
  -5  -1   9 2767.25  231.16
  -5   1   9 3011.02  459.28
   5   1  -8 6633.30  782.41
   5  -1  -8 4518.94  411.02
  -5  -1   8 6956.56 1096.91
  -5   1   8 6001.60  528.82
   5   1  -7 4003.26 1073.30
   5  -1  -7 2079.64  486.04
  -5  -1   7 2803.40  802.08
  -5   1   7 2343.13  787.63
   5   1  -666064.45 2217.79
  -5  -1   665338.09 2107.31
  -5   1   666702.62 2165.26
   5   1  -522628.07 1014.71
   5  -1  -522425.49 1243.75
  -5  -1   526488.04  950.29
  -5   1   522326.05  903.05
   5   1  -4 9868.04  651.14
   5  -1  -4 9781.45  698.94
  -5   1   4 9768.09  834.74
   5   1  -3  221.44  237.56
   5  -1  -3  439.85  228.19
  -5  -1   3  385.47  112.60
  -5  -1   3  386.76  255.04
  -5   1   3  385.11  219.67
   5   1  -233398.60  889.16
   5  -1  -235804.87  997.58
  -5  -1   232921.09  848.14
  -5   1   233961.78  940.32
  -5  -1   233952.33  904.12
   5   1  -233433.09  877.24
  -5   1   233585.59  945.83
   5  -1  -234756.30  933.30
   5   1  -114219.61  802.94
   5  -1  -113502.99  773.96
  -5   1   113679.65  778.74
  -5  -1   115333.31  849.14
   5   1  -112690.08  690.30
  -5   1   113678.88  775.81
   5  -1  -113648.21  750.13
   5   1   0 2573.91  206.03
   5  -1   0 3188.37  447.92
  -5  -1   0 2902.36  429.30
  -5   1   0 3222.70  285.08
  -5   1   0 2689.27  369.29
  -5  -1   0 3084.86  268.01
   5   1   0 2768.71  544.78
  -5   1   0 3746.02  518.14
   5   1   118108.01 1069.32
   5  -1   117024.46  973.66
  -5   1  -115620.51  865.66
  -5  -1  -115255.11  853.92
  -5   1  -117281.54  965.10
  -5  -1  -117618.42  949.09
   5   1   115854.94  862.99
  -5   1  -117249.12  934.67
   5  -1   220906.29 1182.52
   5   1   222532.35  822.86
  -5  -1  -220000.79 1086.22
  -5   1  -221938.84 1176.23
  -5  -1  -222903.37  764.40
   5   1   223689.64  764.56
  -5   1  -223690.05  798.04
   5  -1   3 9795.33  686.56
   5   1   310125.36  615.34
  -5   1  -310019.13  685.41
  -5  -1  -3 8082.28  563.98
  -5   1  -3 9775.49  576.34
   5   1   3 9510.25  527.70
   5  -1   4 9255.73  732.43
   5   1   410440.82  984.89
  -5  -1  -4 9120.78  517.38
  -5  -1  -4 8336.75  597.29
  -5   1  -4 9231.39  623.29
   5   1   5 6516.72  541.00
   5  -1   5 7667.91  614.64
  -5  -1  -5 7214.10  465.90
  -5  -1  -5 7614.41  529.92
  -5   1  -5 7023.03  514.68
   5   1   6 4107.44  520.54
   5  -1   6 4129.80  477.25
  -5   1  -6 3313.89  133.23
  -5   1  -6 3669.67  390.05
   5  -1   7 2711.81  293.97
   5   1   7 2535.29  541.84
  -5   1  -7 1534.80  220.02
  -5   1  -7 1829.82  193.23
   5  -1   8 4164.56  477.37
   5   1   8 3682.95  412.53
  -5   1  -8 3814.18  253.86
  -5   1  -8 3466.07  253.46
   5   1   9  263.52  367.51
   5  -1   9  280.81  206.68
  -5   1  -9   74.18   21.85
  -5   1  -9  213.72   41.35
   5   1  10 9819.79 1066.84
   5  -1  10 8863.35  833.44
   5  -1  1114763.75  967.07
   5   1  1113957.59 1699.80
   5  -1  12 2989.52  503.43
   5   1  12 3959.46  640.18
   5   1  13  582.73  454.06
   5  -1  13  328.78  399.11
   5   1  14 1773.44  544.54
   5  -1  14 2962.72  731.67
   5  -1  15 3853.35 1295.51
   5   1  15 5334.68  710.80
   5  -1  16 4783.26 1207.26
   5   1  16 2641.08 1075.39
   5   1  17  484.62  714.39
   5  -1  17  385.45  282.36
   5   1  18  302.61  268.70
   5  -1  18  127.29  335.37
  -5  -2  20 2263.06  910.91
  -5   2  20 1381.80  716.68
  -5  -2  19  142.68  339.86
  -5   2  19  410.92  216.39
  -5  -2  18 1232.23  588.25
  -5   2  18 1125.99  686.20
  -5  -2  17  -13.60  348.88
  -5   2  17  -38.42  174.94
  -5  -2  17  183.60  193.53
  -5   2  17  199.21  183.32
  -5   2  1614921.13 1344.88
  -5  -2  1615585.68  784.86
  -5   2  1615204.12  720.20
  -5   2  15  485.30  228.80
  -5  -2  15 1009.93  326.13
  -5   2  15  698.50  284.46
  -5   2  1415937.92 1008.80
  -5  -2  1417788.79 1167.09
  -5   2  1414437.94 1297.39
  -5  -2  13 2048.19  542.05
  -5   2  13  550.72  600.88
  -5  -2  13 1600.89  842.25
  -5   2  13 1539.70  597.10
   5  -2 -12 7543.24  805.97
  -5  -2  12 7896.41  786.19
  -5  -2  12 6687.06  719.40
  -5   2  12 6819.88  705.70
   5  -2 -11  598.60  565.12
  -5  -2  11  348.50  215.14
  -5  -2  11  208.27  284.77
  -5   2  11  138.13  276.81
   5  -2 -10 9454.28  811.74
  -5  -2  10 7883.68  687.58
  -5   2  10 9249.55  689.88
   5   2  -9 1023.15  350.15
   5  -2  -9  228.43  141.32
  -5  -2   9  870.49  255.50
  -5   2   9  675.63  234.91
   5   2  -819941.78  908.29
   5  -2  -820078.94  896.65
  -5  -2   818289.42 1139.71
  -5   2   817587.29 1251.33
   5   2  -7 3614.83  383.17
  -5  -2   7 3808.05  395.60
  -5   2   7 4323.36  453.51
   5   2  -614215.50  914.76
  -5  -2   610391.10  744.36
  -5   2   614110.74  851.31
   5   2  -5 1936.96  357.85
   5  -2  -5 1574.40  642.06
  -5  -2   5 2549.69  962.93
  -5   2   5 1817.28  575.15
   5   2  -4 6261.66  506.31
   5  -2  -4 4596.22  535.98
  -5  -2   4 5149.37  537.45
  -5   2   4 4582.18  404.53
   5   2  -320110.55 1103.64
   5  -2  -318088.17 1027.70
  -5  -2   317897.89  974.60
  -5  -2   318764.30 1094.52
  -5   2   320060.87 1105.18
   5   2  -215841.66 1035.12
   5  -2  -214333.70  881.44
  -5  -2   214604.88  800.96
  -5  -2   218334.81 1051.31
   5   2  -215050.42  833.94
  -5   2   215069.02  899.95
   5   2  -1 1645.93  494.06
   5  -2  -1 1287.91  451.33
  -5  -2   1 1283.43  299.56
  -5   2   1 1281.45  355.46
  -5  -2   1 1519.53  504.00
   5   2  -1 1504.36  183.04
  -5   2   1 1325.56  307.09
   5   2   022595.38  790.32
   5  -2   024300.27  908.34
  -5  -2   021268.89 1129.22
  -5   2   022169.57  515.08
  -5  -2   021589.88 1174.43
   5   2   020048.54 1183.37
  -5   2   021669.90 1263.93
   5   2   1  320.54   97.83
   5  -2   1   83.97  109.57
  -5  -2  -1  109.08  132.81
  -5   2  -1  234.63  133.98
  -5  -2  -1   97.83   96.76
   5   2   1  182.53   84.18
  -5   2  -1  168.86  105.55
   5   2   235949.67 1251.13
   5  -2   232458.41 1147.43
  -5  -2  -230952.48 1012.27
  -5   2  -234851.34 1421.60
  -5  -2  -233220.51 1074.02
   5   2   231714.16 1013.76
  -5   2  -234229.27 1109.15
   5  -2   3  366.94  275.41
   5   2   3  156.90   83.40
  -5  -2  -3   79.55  120.49
   5  -2   3  484.15  160.37
  -5   2  -3  133.82  156.92
  -5  -2  -3  196.27  129.14
   5   2   3  281.99   83.40
   5  -2   493533.42 1128.75
   5   2   491486.74 2743.93
   5  -2   490912.19 2673.87
  -5   2  -489875.08 2635.72
  -5  -2  -488846.24 2555.74
   5   2   487674.96 2520.77
   5   2   5  159.52  130.43
   5  -2   5  178.43  169.91
  -5  -2  -5   98.57   75.29
   5  -2   5   82.78  134.98
  -5   2  -5   97.73  135.22
  -5  -2  -5  190.59   82.01
   5   2   625914.34 1169.43
   5  -2   629203.03 1181.78
   5  -2   627855.18 1047.16
   5  -2   7 7889.69  803.36
   5   2   7 5974.34  690.80
   5  -2   7 6052.95  615.51
   5  -2   810337.49 1141.00
   5   2   810774.35  805.76
   5  -2   810791.33  715.34
  -5   2  -810244.93  670.19
   5   2   9 3135.33  748.32
   5  -2   9 1754.26  481.92
   5  -2   9 2279.44  360.04
  -5   2  -9 2564.11  257.88
   5  -2  1014261.31  983.23
   5   2  1014090.25  938.64
   5  -2  1012772.79  667.92
   5  -2  11  606.64  347.93
   5   2  11  464.20  184.88
   5  -2  1215536.40 1011.59
   5   2  1214691.80 1409.13
   5  -2  13  874.13  504.93
   5   2  13  468.47  364.32
   5  -2  14 3371.51  382.41
   5  -2  15  361.45  207.99
   5   2  15  537.33  252.78
   5  -2  16 5687.31  897.36
   5   2  16 6692.50  670.04
   5  -2  17 2243.77  541.92
   5   2  17 2299.33  890.07
   5   2  18 1626.53  733.58
   5  -2  18 2427.78  550.31
  -5   3  20   89.88  337.80
  -5   3  19  579.66  421.82
  -5   3  18  772.07  603.65
  -5  -3  18 1454.43  473.03
  -5  -3  17 7780.35 1156.80
  -5   3  17 8854.83 1056.14
  -5  -3  17 3885.94 1361.14
  -5  -3  16 3703.43  932.78
  -5   3  16 1942.38  710.11
  -5  -3  16 3132.96  373.41
  -5   3  16 2588.24  405.37
  -5  -3  15  690.48  227.18
  -5   3  15 1317.49  347.97
  -5  -3  15  563.81  228.55
  -5   3  15  262.65  144.42
  -5  -3  14  110.40  180.22
  -5   3  14  448.90  230.17
  -5  -3  14  274.67  222.33
  -5   3  14  122.96  252.22
  -5  -3  13 4833.65  467.09
  -5   3  13 5487.08 1158.41
  -5  -3  13 3783.30  282.34
  -5   3  13 4392.84  800.76
   5  -3 -12  397.07  393.66
  -5  -3  12   47.52  361.24
  -5  -3  12  468.60  111.29
  -5   3  12  398.47  262.92
   5  -3 -11 1013.98  484.85
  -5  -3  11  344.07  315.73
  -5  -3  11 1373.44  403.83
  -5   3  11  383.93  262.63
   5  -3 -10 2244.09  599.40
  -5  -3  10 2464.78  566.12
  -5  -3  10  879.21  516.11
  -5   3  10 1930.86  554.57
   5  -3  -923343.84 1142.95
  -5  -3   921183.27 1024.31
  -5   3   921533.86 1052.42
   5   3  -8 4860.27 1039.81
   5  -3  -8 4493.24  616.46
  -5  -3   8 4394.81  531.20
  -5   3   8 4244.55  895.38
   5   3  -7  316.15  237.66
   5  -3  -7  252.74  285.90
  -5  -3   7  309.89  166.40
  -5   3   7   74.96  214.24
   5   3  -621033.43 1284.55
   5  -3  -621097.30 1476.30
  -5  -3   622547.95 1355.54
  -5   3   621542.76 1257.23
   5   3  -5 2928.98  702.11
   5  -3  -5 2015.23  344.79
  -5  -3   5 2324.28  357.44
  -5   3   5 2494.81  766.63
   5   3  -4 7039.15  545.55
  -5  -3   4 8742.18  837.70
   5  -3  -4 8441.10  664.82
  -5  -3   410063.35  674.69
  -5   3   4 8040.05  739.30
   5   3  -3 4472.95  703.60
   5  -3  -3 3739.56  463.82
  -5  -3   3 3664.84  289.24
  -5  -3   3 4691.49  599.09
  -5   3   3 4012.57  958.33
   5   3  -2 8009.56  869.24
   5  -3  -2 7835.33  616.08
  -5  -3   2 7764.56  563.86
  -5  -3   2 7209.36  599.48
  -5   3   2 8142.43  624.92
   5   3  -114159.46  797.31
   5  -3  -115252.86  882.72
  -5  -3   114200.00  770.75
  -5  -3   113913.49  946.81
   5   3  -114940.50  840.40
  -5   3   114613.20  869.19
   5   3   0 1395.50  391.64
   5  -3   0 1376.39  339.30
  -5  -3   0  787.17  194.15
   5  -3   0 1399.88  544.58
  -5  -3   0  933.01  242.08
   5   3   0  375.16  303.04
   5   3   1 1046.41  233.70
   5  -3   1 1445.07  375.75
  -5  -3  -1 1259.94  347.44
   5  -3   1 1272.68  352.62
  -5   3  -1  469.23  188.80
  -5  -3  -1 1107.69  284.55
   5   3   1 1017.12  281.48
   5   3   2 4905.62  397.94
   5  -3   2 5764.55  599.66
  -5  -3  -2 4382.77  330.76
   5  -3   2 5325.16  431.71
  -5   3  -2 4995.06  544.77
  -5  -3  -2 4406.58  524.34
   5   3   2 4915.29  512.84
   5   3   347291.14 1526.35
   5  -3   343800.40 1482.52
  -5  -3  -345068.16 1462.49
   5  -3   350347.61 1657.64
  -5  -3  -349799.46 1535.38
   5   3   349544.50 1505.01
   5  -3   4  194.93  128.79
   5   3   4  147.77  163.84
  -5  -3  -4  276.72  136.47
   5  -3   4   15.51  140.76
  -5   3  -4  240.16  105.37
  -5  -3  -4   52.10  107.51
   5   3   4  198.82   97.43
   5   3   5  211.53  105.16
   5  -3   5  399.12  379.95
   5  -3   5  -66.41  113.28
  -5   3  -5   96.31  111.99
  -5  -3  -5   76.98   68.30
   5   3   5    7.58   35.19
   5  -3   612559.89  862.46
   5   3   614022.13 1038.90
  -5  -3  -613702.86  766.46
   5  -3   613945.40  894.64
  -5  -3  -613628.53  761.34
  -5   3  -612521.73  968.58
   5   3   714223.18 1017.63
   5  -3   715833.04  961.01
   5  -3   713712.95  913.52
   5  -3   8 3340.19  399.43
   5   3   8 3431.51  788.91
   5  -3   8 2202.34  453.92
   5  -3   9 1408.86  602.08
   5   3   9 1240.65  342.62
   5  -3   9 1391.82  340.74
  -5   3  -9 1016.96  235.25
   5  -3  10 9368.29  842.02
   5   3  10 9475.26  826.45
   5  -3  1124510.25 1376.13
   5   3  1119307.91 1115.93
   5  -3  12 1852.46  462.37
   5   3  12 2511.56  444.85
   5  -3  13 1209.61  362.69
   5   3  13 1441.98  416.64
   5  -3  14  948.90  344.93
   5   3  14 1331.72  625.78
   5  -3  15 5632.12  691.52
   5   3  15 4825.24 1345.91
   5  -3  16  381.06  188.17
   5   3  16  175.04  344.96
   5  -3  17  461.57  262.71
   5   3  17  257.05  363.17
   5   3  18  388.88  355.02
   5   3  19 2179.85 1481.34
  -5   4  20  357.87  523.20
  -5  -4  19 1226.63  435.34
  -5   4  19 1343.22  576.35
  -5  -4  18 1221.69  424.01
  -5   4  18 1547.68  574.38
  -5  -4  17 2096.48  516.23
  -5   4  17 1455.72  302.36
  -5  -4  17 2157.89  373.89
  -5  -4  16 3441.79 1325.05
  -5   4  16 3811.92  399.34
  -5  -4  16 2679.76  788.61
  -5   4  16 3334.72 1041.23
  -5  -4  15 6750.46  631.55
  -5   4  15 7147.17  709.88
  -5  -4  15 6064.49  490.51
  -5   4  15 7064.93  396.17
  -5  -4  14  211.57  210.11
  -5   4  14   40.69  133.29
  -5  -4  14  986.63  431.17
  -5   4  14  312.84  327.20
  -5  -4  13 5726.99  631.39
  -5  -4  13 3605.96 1040.96
  -5   4  13 4968.96  714.39
   5  -4 -12 2140.51  562.09
  -5  -4  12 1544.18  531.19
  -5  -4  12 1453.72  420.87
  -5   4  12 1325.60  557.84
   5  -4 -1124530.17 1520.71
  -5  -4  1122247.51 1459.84
  -5  -4  1123011.12 1665.78
  -5   4  1123571.47 1565.70
   5  -4 -10 9556.02  831.77
  -5  -4  10 8817.77  697.18
  -5  -4  1010349.71  738.99
  -5   4  10 9764.77  959.56
   5  -4  -9 8749.45  895.01
  -5  -4   9 7423.64  623.57
  -5  -4   9 7368.36  728.15
  -5   4   9 7710.87  614.68
   5  -4  -8 1097.86  331.85
  -5  -4   8  912.77  232.09
  -5   4   8 1034.87  354.21
   5   4  -746729.82 2062.84
   5  -4  -746093.86 1867.92
  -5  -4   746370.71 1827.01
  -5   4   750552.23 1854.44
   5   4  -6 6243.83  760.47
   5  -4  -6 5874.11  534.77
  -5  -4   6 6505.25  527.77
  -5   4   6 7134.59  571.63
   5   4  -5 3310.50  250.49
   5  -4  -5 3194.88  239.38
  -5  -4   5 4019.12  447.67
  -5   4   5 4874.73 1196.84
   5   4  -430690.53 1209.61
  -5  -4   428879.34  956.78
  -5  -4   427033.77 1107.32
  -5   4   429165.27 1404.92
   5   4  -322477.89  828.76
   5  -4  -318994.26 1124.59
  -5  -4   321198.65 1180.45
  -5  -4   323663.20  908.68
  -5   4   322343.99  867.43
   5   4  -211441.10  656.93
  -5  -4   210330.76  606.77
   5  -4  -210985.73  735.86
   5  -4  -210297.08  680.88
  -5  -4   211039.84  701.72
   5   4  -1 6810.00  512.46
   5  -4  -1 5983.14  525.84
  -5  -4   1 5994.02  423.34
   5  -4  -1 6995.86  575.76
  -5  -4   1 6895.11  558.41
   5   4   0 8345.45  592.09
   5  -4   0 8034.84  617.44
  -5  -4   0 7184.81  500.49
   5  -4   0 8688.55  832.83
  -5  -4   0 8673.74  776.85
   5   4   0 7146.55  534.37
   5   4   119563.98 1062.73
  -5  -4  -117610.20  941.58
   5  -4   120112.31 1119.68
  -5  -4  -119794.62 1096.48
   5   4   119140.87 1055.88
   5   4   2 2260.68  522.81
   5  -4   2 3043.11  647.36
  -5  -4  -2 1918.37  163.30
   5  -4   2 1939.13  411.32
  -5  -4  -2 2143.19  359.45
   5   4   2 1384.45  107.13
   5   4   3  319.92  312.40
  -5  -4  -3  333.93  101.39
   5  -4   3  422.93  286.56
  -5  -4  -3  749.77  226.72
   5   4   3  311.01   98.71
   5   4   410937.49  773.81
  -5  -4  -410867.09  806.60
   5  -4   412880.30 1148.73
  -5  -4  -4 9806.68  727.82
   5   4   412221.02  679.52
   5   4   549590.31 1779.83
   5  -4   551422.03 1981.12
  -5  -4  -549186.89 1715.13
   5   4   550168.46 1738.89
   5   4   6 6924.81  674.26
   5  -4   6 7193.20  726.75
  -5  -4  -6 7377.60  637.79
   5   4   6 7019.12  597.68
   5   4   7  154.60  178.80
   5  -4   7  227.54  134.60
   5  -4   7  108.90  103.01
   5  -4   8 1169.78  308.71
   5   4   8 1633.00  435.09
   5  -4   8 1561.62  487.79
   5  -4   9 4635.11 1154.91
   5   4   9 8471.57  959.69
   5  -4   9 8352.07  700.94
   5  -4  10 7783.54  877.76
   5   4  10 5236.47  424.95
   5  -4  10 5422.68  271.60
   5  -4  11  456.21  289.12
   5   4  11  249.57  163.99
   5  -4  11  116.58   94.61
   5  -4  12 1971.73  571.65
   5   4  12 1859.27  503.70
   5  -4  13 7131.03  782.79
   5   4  13 5406.35  652.49
   5  -4  14 1670.36  620.60
   5   4  14  919.84  464.15
   5  -4  15  938.40  701.96
   5   4  15 1186.34  834.88
   5   4  16 1049.38  441.69
   5  -4  16  180.39  196.18
   5  -4  17 3436.35  905.63
   5   4  17 4749.74  698.60
   5   4  18  179.42  190.95
   5   4  19   87.82  107.23
  -5   5  20  210.26  256.52
  -5  -5  19  419.16  534.78
  -5   5  19  247.68  172.44
  -5  -5  18 3475.78  547.41
  -5   5  18 2958.90  690.11
  -5  -5  18 2223.73  518.53
  -5  -5  17   66.28  238.68
  -5   5  17  685.86  253.92
  -5  -5  17  178.53  141.50
  -5  -5  16 3065.57  788.84
  -5   5  16 4079.54  578.59
  -5  -5  16 3996.44  774.90
  -5   5  16 3505.39  397.43
  -5  -5  15   37.69  377.44
  -5   5  15  604.06  361.58
  -5  -5  15  840.62  267.95
  -5   5  15  315.41  125.34
  -5  -5  14 9702.22  772.94
  -5   5  14 8123.50 1084.15
  -5  -5  1410204.09  915.24
  -5   5  1410765.95 1364.39
   5  -5 -13   87.97  217.26
  -5  -5  13  931.33  312.37
  -5  -5  13  724.33  297.15
  -5   5  13  202.64  126.02
   5  -5 -12 4174.51 1323.95
  -5  -5  12 3883.54  977.11
  -5  -5  12 4276.23  601.70
  -5   5  12 4384.06  385.37
   5  -5 -11  -40.72  276.47
  -5  -5  11  224.70  246.33
  -5  -5  11  342.27  234.85
  -5   5  11  593.11  351.46
   5  -5 -1041285.23 2401.69
  -5  -5  1041981.33 2353.98
  -5  -5  1040342.78 2295.71
  -5   5  1047740.31  873.36
   5  -5  -9 2951.35  864.78
  -5  -5   9 2637.44  735.19
  -5  -5   9 3228.32  860.40
  -5   5   9 2329.31  591.21
   5  -5  -8 4618.96 1134.81
  -5  -5   8 4660.38  430.73
  -5  -5   8 5010.15  505.04
  -5   5   8 4355.52  355.66
   5  -5  -7 2176.67  653.79
  -5  -5   7 1728.25  685.12
  -5  -5   7 2188.74  591.44
  -5   5   7 1581.47  503.71
   5   5  -625761.08 1056.49
   5  -5  -622043.71 1091.35
  -5  -5   623168.72 1086.43
  -5   5   623604.82  980.83
   5   5  -5 6528.57  594.13
   5  -5  -5 4667.40  437.33
  -5  -5   5 5807.88  539.97
  -5   5   5 6526.16  518.22
   5   5  -422791.76 1256.81
   5  -5  -424139.36  862.31
  -5  -5   422295.76 1193.75
   5   5  -3  920.77  172.64
   5  -5  -3 1072.64  322.79
  -5  -5   3 1147.61  194.85
   5  -5  -3  558.39  683.31
  -5  -5   3 1184.02  454.04
   5   5  -227803.95  932.45
  -5  -5   225489.24  819.58
   5  -5  -227452.21  971.91
  -5  -5   229053.20 1068.29
   5   5  -1  343.79   72.41
   5  -5  -1  138.35  179.02
   5  -5  -1  118.84  108.63
  -5  -5   1  283.58  177.81
   5   5   0 7598.38  511.03
   5  -5   0 8199.59  665.04
   5  -5   0 7362.22  634.14
  -5  -5   0 7520.74  564.21
   5   5   1 1025.55  223.44
   5  -5   1 1161.08  425.88
   5  -5   1 1005.56  529.19
  -5  -5  -1  775.52  319.27
   5   5   230083.56 1002.66
   5  -5   231552.39 1074.30
   5  -5   230370.96 1294.54
  -5  -5  -229577.97 1026.33
   5   5   228752.35  933.75
   5   5   3 2152.56  400.93
   5  -5   3 1709.91  524.63
  -5  -5  -3 1451.26  321.83
   5  -5   3 1890.56  503.63
  -5  -5  -3 1925.49  436.55
   5   5   3 1341.33  449.74
   5  -5   411341.66  761.39
   5   5   411046.48  696.22
  -5  -5  -4 9921.00  667.61
   5  -5   411165.66  773.08
  -5  -5  -412660.89  828.27
   5   5   410526.93  668.28
   5  -5   5 4065.36 1065.41
   5   5   5 2611.82  178.51
  -5  -5  -5 2312.05  156.99
   5  -5   5 2783.20  725.60
  -5  -5  -5 2421.80  163.50
   5   5   5 2524.36  148.29
   5   5   635784.97 1508.18
   5  -5   632713.53 1716.69
   5  -5   636598.79 1706.43
  -5  -5  -636968.65 1479.79
   5   5   635467.99 1435.27
   5  -5   7 1269.45  678.38
   5   5   7 2000.52  546.78
  -5  -5  -7 1133.09  230.59
   5  -5   7 1155.08  508.63
   5   5   7  978.41  108.11
   5   5   8 3234.07  476.41
   5  -5   8 2337.21  627.23
   5   5   9   80.38  126.59
   5  -5   9  135.91  203.93
   5   5  1014893.92  904.35
   5  -5  1011646.77  732.74
   5  -5  11 1087.73  414.40
   5   5  11 1380.26  540.23
   5  -5  11  909.05  538.43
   5  -5  12 8329.35  588.51
   5   5  12 5152.03  744.93
   5  -5  13  459.10  367.08
   5   5  13  279.45  250.21
   5  -5  14  874.37  404.65
   5   5  14  742.81  421.94
   5  -5  15   71.33  213.16
   5   5  15  264.62  234.39
   5  -5  16 1072.67  450.22
   5   5  16  771.52  625.46
   5  -5  17   62.04  220.31
   5   5  17   81.92  156.67
   5   5  18 4447.31  553.99
  -5   6  20 3384.86 1082.28
  -5  -6  19 2139.51 1224.44
  -5   6  19 1456.04  401.63
  -5  -6  18  386.96  342.90
  -5   6  18  954.55  253.90
  -5  -6  18  952.52  443.73
  -5  -6  17 1788.24  561.13
  -5   6  17  965.33  365.89
  -5  -6  17  934.78  397.32
  -5  -6  1611639.20 1313.77
  -5   6  16 8562.89 1770.66
  -5  -6  16 9470.63 1050.68
  -5   6  16 8175.89 1127.36
  -5  -6  15 3969.78 1239.63
  -5   6  15 5382.64  982.36
  -5  -6  15 3459.24  874.28
  -5   6  15 3626.24  709.74
  -5  -6  14 2979.95  997.65
  -5   6  14 1428.42  302.64
  -5  -6  14 2261.39  693.74
  -5   6  14 1937.27  306.71
   5  -6 -13 2232.82  501.56
  -5  -6  13 1281.66  556.09
  -5  -6  13 1707.74  733.23
  -5   6  13 2349.55  486.36
   5  -6 -12 1881.39  642.16
  -5  -6  12 1261.66  350.72
  -5  -6  12 2571.55  654.27
  -5   6  12 2744.26  669.65
   5  -6 -11 3789.50 1012.38
  -5  -6  11 3657.15 1056.25
  -5  -6  11 3519.11  734.96
  -5   6  11 2764.79  812.73
   5  -6 -10 7040.59 1032.22
  -5  -6  10 8370.77 1265.57
  -5  -6  10 9375.40  863.70
  -5   6  10 9430.85  804.62
   5  -6  -9  889.67  337.65
  -5  -6   9 1657.29  592.96
  -5  -6   9 2478.58  810.36
  -5   6   9 1411.87  488.50
   5  -6  -810834.59  942.15
  -5  -6   811091.89 1160.58
  -5  -6   811488.56  902.46
  -5   6   811136.81  852.78
   5  -6  -727254.09 1310.59
  -5  -6   727596.24 1203.21
  -5  -6   728597.91 1413.34
  -5   6   730644.56 1356.26
   5  -6  -6 6100.89  953.77
  -5  -6   6 6694.14  620.29
  -5  -6   6 6128.50 1026.36
  -5   6   6 5797.84  608.52
   5  -6  -5  240.28  327.02
   5  -6  -5  306.91  268.79
  -5  -6   5  487.86  244.95
   5   6  -417172.55 1081.00
   5  -6  -417272.41 1139.76
  -5  -6   416220.05  978.24
   5   6  -319126.93 1085.61
  -5  -6   317440.43  951.12
   5  -6  -317291.44  993.84
   5  -6  -319224.90 1122.60
  -5  -6   317698.28 1110.55
   5   6  -216863.57  935.93
   5  -6  -219037.51 1105.41
   5  -6  -218641.19 1144.49
  -5  -6   218897.09 1105.38
   5   6  -1 1013.21  300.36
   5  -6  -1 1039.82  361.05
   5  -6  -1 1111.87  792.35
  -5  -6   1  925.81  205.83
   5   6   021141.01 1124.67
   5  -6   021442.64 1334.09
  -5  -6   019191.29 1023.62
   5  -6   021920.14 1376.63
  -5  -6   022930.23  580.79
   5   6   118778.22 1020.23
   5  -6   119636.18 1127.18
  -5  -6  -118580.23  995.83
   5  -6   117297.93 1052.99
  -5  -6  -120238.95 1160.60
   5   6   2 4296.19  437.38
   5  -6   2 4389.51  983.02
  -5  -6  -2 4452.38  440.06
   5  -6   2 4980.54  537.91
  -5  -6  -2 5529.90  555.67
   5   6   3 2788.48  344.70
   5  -6   3 3312.78  974.25
   5  -6   3 2765.53  482.40
  -5  -6  -3 3155.76  298.54
   5   6   4 5350.00  510.05
   5  -6   4 5874.47 1300.40
   5  -6   4 5234.41  579.86
  -5  -6  -4 4669.53  466.48
   5   6   4 4043.30  386.51
   5   6   5  150.37   76.37
   5  -6   5 -158.71  178.05
  -5  -6  -5   75.42   80.58
   5  -6   5  124.19   95.03
  -5  -6  -5  149.22  149.25
   5   6   5   14.26   79.78
   5   6   6 5449.78  421.60
   5  -6   6 5047.94  892.91
   5  -6   6 5120.63  444.03
  -5  -6  -6 4545.48  539.74
   5   6   6 4259.03  311.23
   5  -6   7 2996.84  686.81
   5   6   7 2241.68  393.87
   5  -6   7 2732.68  482.05
  -5  -6  -7 1835.97  203.37
   5   6   7 2230.01  176.74
   5  -6   8 4788.53  729.93
   5   6   8 4104.94  558.21
   5  -6   8 3231.00  418.66
   5  -6   9 7171.55  803.22
   5   6   9 7705.97  634.09
   5  -6   9 6234.28  722.93
   5  -6  10 7600.33 1009.02
   5   6  10 9219.93  774.99
   5  -6  10 6822.75  650.85
   5  -6  11  743.23  464.56
   5   6  11 1297.67  447.26
   5  -6  11  980.31  303.22
   5  -6  12 4532.26 1119.10
   5   6  12 3717.50  666.74
   5   6  13 7517.03  395.44
   5   6  14 1511.96  683.82
   5  -6  15  617.66  416.06
   5   6  15  504.30  294.84
   5  -6  16 7177.33 1298.16
   5   6  16 7755.49 1052.41
   5  -6  17 1545.23 1003.84
  -5  -7  19  219.39  251.01
  -5   7  19  132.95  311.03
  -5  -7  18 1097.34  416.06
  -5   7  18  357.96  274.04
  -5  -7  18   70.62  167.21
  -5  -7  17 7127.04  953.89
  -5   7  17 9143.07  786.09
  -5  -7  17 7134.11  746.58
  -5  -7  16  783.11  318.32
  -5   7  16   83.68  175.08
  -5  -7  16  156.76  252.69
  -5  -7  15 1490.53  604.85
  -5   7  15 1402.78  674.34
  -5  -7  15 1343.34  797.17
  -5   7  15  823.82  530.20
  -5  -7  14  222.79  229.32
  -5   7  14  533.73  280.32
  -5  -7  14  244.72  211.93
   5  -7 -1317194.72 1198.36
  -5  -7  1321078.68 1392.80
  -5  -7  1319376.95 2167.56
  -5   7  1318970.52 1249.30
   5  -7 -12  362.89  372.90
  -5  -7  12  270.48  237.41
  -5  -7  12  176.73  209.95
  -5   7  12  379.51  174.42
   5  -7 -11 1043.14  506.58
  -5  -7  11  481.20  313.65
  -5  -7  11  597.02  207.57
  -5   7  11  672.24  192.23
   5  -7 -10  182.31  205.21
  -5  -7  10  119.59   95.91
  -5  -7  10   11.70  160.63
  -5   7  10   76.54  241.17
   5  -7  -910349.47  943.31
  -5  -7   913352.69  868.84
  -5  -7   911360.04 1006.90
  -5   7   912839.71 1007.54
   5  -7  -8 1270.30  604.14
  -5  -7   8 1415.97  318.59
  -5  -7   8 1617.65  657.54
  -5   7   8 1415.16  430.54
   5  -7  -7  470.52  156.19
  -5  -7   7   74.88  309.06
  -5  -7   7  146.85  215.45
  -5   7   7  132.99  163.99
   5  -7  -6  333.63  301.14
  -5  -7   6  295.53  180.15
   5  -7  -6  304.85  327.60
  -5  -7   6  482.08  220.91
   5  -7  -511154.64  835.44
  -5  -7   511113.42  778.23
   5  -7  -510967.05  856.64
  -5  -7   511558.42  986.95
   5  -7  -4  553.53  243.23
  -5  -7   4   49.76   64.31
  -5  -7   4   33.91  112.53
   5  -7  -4  189.06  270.02
   5  -7  -3  736.40  291.62
  -5  -7   3  601.16  139.39
   5  -7  -3  116.95  167.09
  -5  -7   3  573.69  208.65
   5   7  -2 2281.03  159.86
   5  -7  -2 2204.90  725.95
   5  -7  -2 2997.29  836.71
  -5  -7   2 2756.27  608.01
   5   7  -162306.02  602.44
   5  -7  -160947.34 2291.04
  -5  -7   158496.21 2000.49
   5  -7  -163983.75 1016.57
  -5  -7   160904.67 2269.37
   5  -7   0   35.89  104.35
  -5  -7   0   31.35   29.95
   5  -7   0  153.81  275.22
  -5  -7   0  183.78  319.63
   5   7   1 1441.72  228.80
   5  -7   1 3756.84  881.94
  -5  -7  -1 1622.37  105.37
   5  -7   1 1999.64  676.13
  -5  -7  -1 2512.66  455.77
   5   7   2 1401.71  173.16
   5  -7   2 1514.13  670.34
  -5  -7  -2 1380.83   82.36
   5  -7   2  905.70  294.80
  -5  -7  -2 1671.01  516.12
   5   7   324808.64 1016.50
   5  -7   326486.28 1210.00
  -5  -7  -322921.59  933.56
   5  -7   322915.14 1277.04
  -5  -7  -326226.94 1169.31
   5   7   4 1366.71  299.21
   5  -7   4 1723.26  556.88
  -5  -7  -4 1111.12  214.59
   5  -7   4  920.23  483.03
  -5  -7  -4 1461.56  430.08
   5   7   5  299.27  185.14
   5  -7   5  237.78  243.86
   5  -7   5  936.59  324.98
  -5  -7  -5  736.19  296.96
   5  -7   6 2837.61 1067.48
   5   7   6 1921.27  259.98
   5  -7   6 1555.62  422.03
  -5  -7  -6 2158.74  505.71
   5   7   6 2116.09  318.08
   5   7   726930.02 1501.58
   5  -7   725294.54 1462.23
  -5  -7  -726498.60 1415.70
   5  -7   727192.82 1543.23
   5  -7   8   28.78  243.35
   5   7   8  360.21  141.47
  -5  -7  -8  328.36  148.51
   5  -7   8  517.66  240.54
   5  -7   9 1095.08  482.59
   5   7   9  838.81  254.81
   5  -7   9  331.33  137.33
   5  -7  10  218.47  158.13
   5   7  10   99.62  186.76
   5  -7  10  170.34  168.81
   5  -7  11 8055.74  635.32
   5   7  11 7608.95  359.01
   5  -7  11 7469.32  420.60
   5  -7  12   83.23  250.05
   5   7  12  365.46  299.81
   5  -7  13  571.11  408.39
   5   7  13  312.07  222.92
   5  -7  14  112.63  301.97
   5   7  14  119.43  167.35
   5  -7  15 9625.47 1761.57
   5  -7  16  308.38  179.46
  -5   8  19  776.38  384.98
  -5  -8  18 1005.01  905.86
  -5   8  18  887.81  353.59
  -5  -8  18  906.08  323.47
  -5  -8  17  541.44  407.04
  -5   8  17  342.06  217.94
  -5  -8  17  360.93  475.80
  -5  -8  16 3857.78  930.74
  -5   8  16 4770.79  966.66
  -5  -8  16 5768.68  637.23
  -5  -8  15 1868.68 1132.94
  -5   8  15 1542.91  674.40
  -5  -8  15 2006.97 1091.29
  -5   8  15  788.62  676.09
  -5  -8  14 2045.17  392.05
  -5   8  14 1447.42  257.40
  -5  -8  14  574.65  427.24
  -5   8  14  368.63  401.70
   5  -8 -13  519.80  355.88
  -5  -8  13  605.60  247.10
  -5  -8  13  298.00  213.55
  -5   8  13  310.01  237.79
   5  -8 -1211173.30  857.21
  -5  -8  1210529.79 1091.90
  -5  -8  12 9740.43 1142.08
  -5   8  1210756.95  746.90
   5  -8 -11 5212.51  943.22
  -5  -8  11 4497.69 1106.52
  -5  -8  11 4800.17 1076.04
  -5   8  11 4541.54  505.19
   5  -8 -10 3584.81  520.12
  -5  -8  10 3687.05  318.74
  -5  -8  10 3504.72 1091.43
  -5   8  10 3471.78  444.29
   5  -8  -9  274.74   80.32
  -5  -8   9  128.55  218.64
  -5  -8   9    4.78  156.22
  -5   8   9   42.69   93.47
   5  -8  -8 2993.77  900.05
  -5  -8   8 2518.19  358.38
  -5  -8   8 2757.31  437.14
  -5   8   8 3461.51  501.31
   5  -8  -7 1520.43  422.74
  -5  -8   7 2220.06  390.82
  -5  -8   7 1526.98  976.18
   5  -8  -6 3054.22  262.55
  -5  -8   6 2886.93  427.36
   5  -8  -6 2907.61  421.58
  -5  -8   6 3009.52  525.31
   5  -8  -5  853.68  218.37
  -5  -8   5  728.14  447.38
   5  -8  -5 1233.70  427.99
  -5  -8   5 1402.04  591.55
   5  -8  -417377.99  877.84
  -5  -8   415980.58  702.65
  -5  -8   416371.02  716.81
   5  -8  -414809.13 1071.29
  -5  -8   414869.08 1347.54
   5  -8  -327710.70 1221.57
  -5  -8   325763.91 1077.31
  -5  -8   331139.87 1441.41
   5  -8  -2 2191.13  465.36
  -5  -8   2 1894.22  170.53
  -5  -8   2 2153.74  281.69
   5  -8  -2 2399.62  643.09
  -5  -8   2 2051.41  714.82
   5  -8  -1 1897.63  576.83
  -5  -8   1 1538.23   78.56
  -5  -8   1 1891.62  184.41
   5  -8  -1 1465.95  755.47
  -5  -8   1 2286.62  672.77
   5  -8   015449.79  591.61
  -5  -8   015050.67  906.99
   5  -8   012555.93 1172.47
  -5  -8   015182.40 1146.57
   5  -8   1 7280.29  581.20
   5  -8   1 5441.23  713.13
  -5  -8  -1 7819.32  650.67
   5  -8   214825.58 1024.83
   5  -8   216190.66 1340.35
  -5  -8  -214872.22 1059.70
   5   8   3 5539.09  325.77
   5  -8   3 6724.73  589.91
   5  -8   3 5051.46  479.58
  -5  -8  -3 5930.40  462.17
   5   8   4 3578.05  218.66
   5   8   4 4077.94  156.72
   5  -8   4 3246.70  331.06
   5  -8   4 4099.24  452.37
  -5  -8  -4 3526.45  390.85
   5   8   5 9683.90  578.40
   5   8   511127.76  646.47
   5  -8   510130.81 1273.54
   5  -8   511508.49 1092.91
  -5  -8  -5 9750.15  698.12
   5   8   6 9165.21  711.42
   5  -8   612371.82  858.44
   5  -8   610260.16  981.89
  -5  -8  -6 9365.44  889.02
   5  -8   7 2073.97  689.11
   5   8   7 1232.17  347.34
   5  -8   7  538.09  185.25
  -5  -8  -7 1304.94  394.52
   5   8   8 9277.81  635.84
   5  -8   810713.59  727.29
  -5  -8  -8 8233.42  546.86
   5  -8   8 8821.93  740.87
   5  -8   9 3055.38  438.29
   5   8   9 2875.21  480.77
   5  -8   9 3378.88  334.95
   5  -8  10 3830.24  651.08
   5   8  10 3223.37  521.03
   5  -8  10 3764.28  280.45
   5  -8  11  222.98  185.57
   5   8  11  131.97  163.46
   5  -8  11  353.27  227.56
   5  -8  12 5603.68 1255.03
   5  -8  13 8224.36 1042.88
   5  -8  14 2318.25 1110.84
   5  -8  15  697.02  374.43
   5  -8  16 1613.35 1026.67
  -5  -9  18  839.55  678.28
  -5   9  18 1232.21  706.11
  -5  -9  18 1537.57  537.90
  -5  -9  17  230.13  260.69
  -5   9  17  270.48  229.19
  -5  -9  17  516.87  486.00
  -5  -9  16  768.34  408.79
  -5   9  16  315.48  386.47
  -5  -9  16  555.90  443.22
  -5  -9  15  906.02  405.58
  -5   9  15  118.70  190.12
  -5  -9  15   68.81  169.60
  -5   9  15  349.48  177.29
  -5  -9  14 4019.89 1302.26
  -5   9  14 5878.11  540.63
  -5  -9  14 4604.32 1115.14
  -5   9  14 5066.35  866.46
  -5  -9  13 4006.70  976.33
  -5  -9  13 4985.41  478.65
  -5   9  13 4601.15  467.30
   5  -9 -12 3349.81  527.82
  -5  -9  12 4386.27 1094.74
  -5  -9  12 3991.22  868.86
  -5   9  12 3325.36  998.64
   5  -9 -11  102.86  251.58
  -5  -9  11  485.39  278.74
  -5  -9  11 1086.29  431.03
  -5   9  11  367.53  309.40
   5  -9 -1020593.60 1208.63
  -5  -9  1020442.80 1179.35
  -5  -9  1017713.90 1166.65
  -5   9  1020917.72 1812.10
   5  -9  -9  873.69  500.17
  -5  -9   9  752.09  394.22
  -5  -9   9  965.65  243.80
  -5   9   9  565.13  283.81
   5  -9  -8 3558.97  645.16
  -5  -9   8 3163.36  388.14
  -5  -9   8 3236.34 1226.83
  -5   9   8 2818.01  699.21
   5  -9  -7 2670.62  404.78
  -5  -9   7 2160.01  319.07
   5  -9  -7 2977.24 1061.95
  -5  -9   7 2766.17 1218.21
   5  -9  -6 7610.01  661.79
  -5  -9   6 9108.80  820.20
   5  -9  -6 8919.56  845.31
  -5  -9   6 7482.97  723.57
   5  -9  -518924.26 1121.32
  -5  -9   517719.97  995.44
   5  -9  -515408.87 1046.19
   5  -9  -4 2148.58  490.64
  -5  -9   4 1523.21  342.22
   5  -9  -4 2481.27  778.71
  -5  -9   4 1802.98  606.64
   5  -9  -3 1036.41  284.33
  -5  -9   3  646.23  231.05
  -5  -9   3  676.86  171.55
  -5  -9   3  623.50  433.71
   5  -9  -220905.69 1197.02
  -5  -9   219725.54 1052.18
  -5  -9   219547.52 1044.80
   5  -9  -219851.09 1290.81
  -5  -9   219118.16 1268.97
   5  -9  -1 3625.76  958.02
   5  -9  -1 3378.24 1172.88
  -5  -9   1 3333.83  655.20
   5  -9   013184.23  842.20
   5  -9   014650.84  982.83
  -5  -9   014007.82  946.68
   5  -9   1 1797.97  255.65
   5  -9   1 1268.93  766.80
  -5  -9  -1 1919.25  564.01
   5  -9   218275.88 1215.25
   5  -9   220500.83 1267.72
  -5  -9  -218522.83 1405.17
   5  -9   313247.10  903.48
   5  -9   311606.25 1298.52
  -5  -9  -312536.93  805.82
   5  -9   4 5227.43  494.86
   5  -9   4 3539.11  819.69
  -5  -9  -4 5020.08  815.49
   5   9   5   81.40   62.00
   5  -9   5  276.18  203.86
   5  -9   5  119.35  231.90
  -5  -9  -5  242.03  306.54
   5  -9   615432.70 1166.62
   5  -9   616639.67 1063.33
  -5  -9  -618329.80 1241.82
   5  -9   7 3609.78  788.63
   5  -9   7 3274.78  429.16
  -5  -9  -7 2309.40  596.59
   5  -9   8 1936.96  723.89
  -5  -9  -8 1385.48  351.09
   5  -9   8 1319.14  372.85
   5  -9   9  195.95  322.82
   5  -9   9  271.14  163.59
   5  -9  10 7506.78  509.03
   5  -9  10 7737.69  733.69
   5  -9  11 1012.01  951.64
   5  -9  11 1468.55  580.48
   5  -9  12 6924.88 1291.60
   5  -9  13  251.33  474.24
   5  -9  14 3889.88 1571.30
   5  -9  15  501.11  413.39
  -5 -10  18  559.59  500.94
  -5 -10  18  403.66  236.98
  -5 -10  17  340.42  365.90
  -5 -10  16  377.18  490.79
  -5  10  16  767.73  386.34
  -5 -10  16  877.33  337.03
  -5 -10  15 4234.72 1344.88
  -5  10  15 4909.25  870.61
  -5 -10  15 4479.15 1047.96
  -5 -10  14   50.88  260.48
  -5  10  14  507.42  178.88
  -5 -10  14  272.67  447.80
  -5  10  14   71.13  230.73
  -5 -10  13  516.84  259.72
  -5 -10  13  308.37   85.72
  -5  10  13   75.35  149.88
   5 -10 -12 1973.93  681.96
  -5 -10  12 3281.82  703.23
  -5 -10  12 1902.35  594.17
  -5  10  12 2400.05  418.24
   5 -10 -1114366.52 1379.66
  -5 -10  1113191.13 1447.23
  -5 -10  1118539.30 2348.09
  -5  10  1112701.01 1369.39
   5 -10 -10 1501.23  621.55
  -5 -10  10 2326.81  734.54
  -5 -10  10 1412.59 1103.89
  -5  10  10 1796.80  500.09
   5 -10  -9 1666.10  477.01
  -5 -10   9 1592.75  523.16
  -5 -10   9 1892.41  805.21
  -5  10   9 1420.04  613.89
   5 -10  -8 2171.38  377.17
  -5 -10   8  984.53  516.32
   5 -10  -8  648.05  372.45
  -5 -10   8 3284.94  686.00
   5 -10  -715286.53  905.21
  -5 -10   715012.24  920.51
   5 -10  -714064.35  897.84
  -5 -10   717091.01 1181.68
   5 -10  -6 3406.80  666.98
  -5 -10   6 3866.29  490.32
   5 -10  -6 3887.41  609.45
  -5 -10   6 2337.70 1314.08
   5 -10  -5 8393.85  682.35
  -5 -10   5 7371.62  519.16
   5 -10  -5 6186.41  994.27
   5 -10  -415986.77  979.07
  -5 -10   414027.08  779.60
   5 -10  -415850.71 1115.01
  -5 -10   416084.28 1191.38
   5 -10  -332399.69 1715.27
  -5 -10   326329.62 1348.35
  -5 -10   327570.80 1429.14
  -5 -10   328885.82 1689.87
   5 -10  -220674.48 1214.20
  -5 -10   218832.23  940.43
  -5 -10   219210.65  962.60
   5 -10  -217684.20 1306.29
  -5 -10   219892.47 1491.54
   5 -10  -1  715.73  216.98
   5 -10  -1  397.98  361.35
  -5 -10   1  165.16  439.05
   5 -10   0 2078.38  779.46
   5 -10   0  619.63  599.13
  -5 -10   0 2293.17  679.59
   5 -10   111388.60 1017.97
   5 -10   1 9237.39  842.88
  -5 -10  -1 8379.64  880.54
   5 -10   2 1696.95  389.46
   5 -10   2 2228.87  361.71
  -5 -10  -2 1578.80  268.09
   5 -10   3 2727.68  478.00
   5 -10   3 1638.11  419.02
  -5 -10  -3 3083.96  724.83
   5 -10   4  423.37  289.57
   5 -10   4   14.57  310.89
  -5 -10  -4  508.41  188.04
   5 -10   520470.06 1154.85
   5 -10   519831.11 1403.16
  -5 -10  -521142.61 1432.99
   5 -10   6 7577.63  850.35
   5 -10   6 6481.78  956.51
  -5 -10  -6 7047.83  565.49
   5 -10   7 1633.29  482.96
  -5 -10  -7 1326.48  521.93
   5 -10   7 1589.54  487.14
   5 -10   8 3033.90  949.47
  -5 -10  -8 3434.95  369.03
   5 -10   8 4927.31  797.34
   5 -10   915673.00 1430.36
   5 -10   917591.59 1832.00
   5 -10  10 1919.93  469.69
   5 -10  10 1316.11  482.67
   5 -10  11  420.60  418.62
   5 -10  11  926.93  351.84
   5 -10  12   44.54  336.69
   5 -10  12  226.55  218.00
   5 -10  13 5398.64 1017.07
   5 -10  14  732.22  320.53
   5 -10  15  624.69  287.20
  -5 -11  17 2181.81  391.58
  -5 -11  17  489.92  558.93
  -5 -11  16  279.33  194.38
  -5 -11  16  532.36  332.90
  -5 -11  15  692.15  419.24
  -5 -11  15  549.61  355.58
  -5 -11  14  418.26  232.77
  -5 -11  14  518.92  293.90
  -5  11  14  438.67  215.85
  -5 -11  13 6541.31  664.40
  -5  11  13 5654.35  861.00
  -5 -11  13 7242.16 1025.27
  -5  11  13 7836.69  963.91
   5 -11 -12  -31.28   99.37
  -5 -11  12  178.30  319.72
  -5  11  12  207.66  280.50
   5 -11 -11 1313.31  412.79
  -5 -11  11 1007.54  408.14
  -5 -11  11 1101.30  380.81
  -5  11  11 1319.56  453.26
   5 -11 -10 1430.33  555.67
  -5 -11  10 1726.99  426.59
  -5 -11  10  404.10  571.59
  -5  11  10 1819.55  682.09
   5 -11  -915700.00 1078.65
  -5 -11   914910.70 1010.59
  -5 -11   912565.50 1012.14
  -5  11   915419.21 1195.34
   5 -11  -8 2130.45  533.73
  -5 -11   8 1871.34  449.60
   5 -11  -8 2907.54 1059.70
  -5 -11   8 3126.86  790.12
   5 -11  -7  -67.43  218.46
  -5 -11   7   43.98  106.15
   5 -11  -7  390.05  338.82
  -5 -11   7 -250.78  233.06
   5 -11  -6  945.90  256.13
  -5 -11   6  929.38  216.97
   5 -11  -6  702.42  565.56
  -5 -11   6  879.82  532.12
   5 -11  -5 2067.90  423.14
  -5 -11   5 1547.34  474.54
   5 -11  -5 2933.23 1083.95
   5 -11  -4 1896.57  685.87
  -5 -11   4 1495.18  270.18
   5 -11  -4 2638.53  965.80
  -5 -11   4 2354.01  847.85
   5 -11  -3 4637.52  320.21
  -5 -11   3 3387.65  170.07
   5 -11  -3 5307.88 1110.78
   5 -11  -2 7700.40  582.98
   5 -11  -2 6361.20  908.16
   5 -11  -1 6470.14  550.20
   5 -11  -1 6742.12  691.68
  -5 -11   1 7650.00  748.09
   5 -11   0  416.22  191.83
   5 -11   0  546.55  322.57
  -5 -11   0  182.09  240.98
   5 -11   1  216.71  236.46
   5 -11   1   49.58  243.71
  -5 -11  -1  473.74  171.45
   5 -11   2 1810.82  575.49
   5 -11   2 1567.35  398.92
  -5 -11  -2 1277.01  385.86
   5 -11   3 8441.43 1044.50
   5 -11   3 8137.24 1085.41
  -5 -11  -3 8983.59  738.42
   5 -11   4  296.92  177.95
   5 -11   4  297.53  543.31
  -5 -11  -4  346.91  200.08
   5 -11   5  207.17  210.05
   5 -11   5  480.13  374.74
  -5 -11  -5  230.78  171.62
   5 -11   6  189.99  142.18
   5 -11   6  353.82  277.32
  -5 -11  -6   52.34  232.97
   5 -11   715085.97 1560.22
  -5 -11  -715502.22 1402.72
   5 -11   717217.04 1828.91
   5 -11   8 1678.27 1191.17
   5 -11   8 1659.69  472.73
   5 -11   9  618.46  259.57
   5 -11   9  304.82  215.49
   5 -11  10 5359.99  483.91
   5 -11  10 3172.22  828.86
   5 -11  11 3049.92 1202.81
   5 -11  11 3626.75 1005.05
   5 -11  12  375.16  224.24
   5 -11  12  143.85  150.02
   5 -11  13  101.91  233.13
   5 -11  14  571.93  478.28
  -5 -12  17  722.46  315.31
  -5 -12  16 3018.21  929.21
  -5 -12  16 3891.64  915.56
  -5 -12  15  200.95  265.50
  -5 -12  15   92.05  567.90
  -5 -12  14 1523.38  849.12
  -5 -12  14 2747.77 1167.54
  -5  12  14 1783.50  871.81
  -5 -12  13  523.50  325.00
  -5 -12  13   40.85  221.81
  -5  12  13   90.88  157.07
  -5 -12  12 8792.31  886.26
  -5 -12  12 7842.77 1501.79
  -5  12  1211388.54 1050.56
   5 -12 -11  470.43  293.62
  -5 -12  11  701.66  197.92
  -5 -12  11 1790.35  388.08
  -5  12  11 1092.19  503.62
   5 -12 -10 1941.10  899.92
  -5 -12  10 3292.56  295.70
  -5 -12  10 2892.38 1404.73
  -5  12  10 1933.23  829.24
   5 -12  -9  850.79  228.13
  -5 -12   9  563.00  249.71
  -5 -12   9  988.76  365.58
   5 -12  -816195.14 1400.77
  -5 -12   815340.43 1303.20
   5 -12  -814073.82 1466.84
  -5 -12   817741.01 1764.81
   5 -12  -7  297.99  226.68
  -5 -12   7  327.20  125.80
   5 -12  -7  341.19  424.77
  -5 -12   7  601.95  435.73
   5 -12  -6 4227.86  569.30
   5 -12  -6 4226.65 1418.21
  -5 -12   6 4371.23 1666.06
   5 -12  -5  178.35  194.74
   5 -12  -5  118.27  323.53
  -5 -12   5  452.52  206.77
   5 -12  -4 8277.85  734.73
   5 -12  -4 9671.84  891.32
  -5 -12   4 8207.86 1157.07
   5 -12  -3    1.31   68.68
   5 -12  -3  636.72  452.94
  -5 -12   3  510.21  301.39
   5 -12  -2 6770.19  596.01
   5 -12  -2 6425.86  707.19
  -5 -12   2 5319.14 1264.05
   5 -12  -1  384.01  532.48
   5 -12  -1 1004.70  513.11
  -5 -12   1  563.72  365.36
   5 -12   0 4363.01  492.53
   5 -12   0 4608.28  529.75
  -5 -12   0 5722.30  581.69
   5 -12   1  666.78  419.86
   5 -12   1  345.06  232.72
  -5 -12  -1  107.58  341.20
   5 -12   215257.07 1249.32
   5 -12   218324.17 1233.72
  -5 -12  -214883.32 1263.75
   5 -12   3 2129.93  812.91
   5 -12   3 1161.56  363.75
  -5 -12  -3 1362.06  283.67
   5 -12   414930.50 1021.31
   5 -12   413625.21 1090.36
  -5 -12  -414098.38  968.26
   5 -12   5  567.53  270.02
   5 -12   5  381.10  126.38
  -5 -12  -5  442.95  363.86
   5 -12   6 5605.08  432.21
   5 -12   6 5878.01 1110.93
  -5 -12  -6 5297.75  424.99
   5 -12   7 1392.53  543.30
  -5 -12  -7 1074.42  609.03
   5 -12   7 1058.48  329.98
   5 -12   8 6009.65  420.76
   5 -12   8 4615.61  862.87
   5 -12   9 1469.83  561.29
   5 -12   9  862.25  454.44
   5 -12  10 5906.73  474.54
   5 -12  10 4221.62  586.19
   5 -12  11  299.51  249.13
   5 -12  11  205.98  161.23
   5 -12  12 2879.14  593.02
   5 -12  12  873.16  469.18
   5 -12  13  369.17  256.19
   5 -12  14 1406.73  499.82
  -5 -13  15  469.36  199.67
  -5 -13  14  392.64  513.90
  -5 -13  13 5704.24  755.38
  -5  13  13 4784.37  847.88
  -5 -13  12 2131.55  675.63
  -5  13  12  326.66  296.31
  -5 -13  11 1972.42  448.78
  -5  13  11 1007.91  465.64
  -5 -13  10 3622.03  966.74
  -5  13  10 3546.41  426.95
   5 -13  -9 2726.49  653.18
  -5 -13   9 3345.02 1456.16
   5 -13  -8 1586.73  497.62
   5 -13  -8 1159.66  842.24
  -5 -13   8 1923.52 1319.88
   5 -13  -7   85.45  127.43
   5 -13  -7  113.37  201.26
  -5 -13   7   43.85  262.38
   5 -13  -6 3491.80  871.54
   5 -13  -6 2088.08 1088.94
  -5 -13   6 4684.97 1287.72
   5 -13  -510268.84 1002.33
   5 -13  -512800.72 1234.45
  -5 -13   514317.40 2530.12
   5 -13  -4 2944.29  397.12
   5 -13  -4 2512.00  874.14
  -5 -13   4 4046.43 1230.82
   5 -13  -3  573.01  257.30
   5 -13  -3  579.97  359.87
  -5 -13   3 1023.24  452.43
   5 -13  -211243.68  726.31
  -5 -13   2 9083.61  675.11
   5 -13  -1 8412.77  517.07
   5 -13  -1 5907.18 1584.46
  -5 -13   1 8988.08  634.99
   5 -13   0 1313.72  550.98
   5 -13   0 1055.75  438.05
  -5 -13   0 1537.17  625.37
   5 -13   1 1701.38  396.27
   5 -13   1 1768.13  438.03
  -5 -13  -1 1161.33  643.63
   5 -13   2 5464.48  448.71
   5 -13   2 5207.25  815.85
  -5 -13  -2 6027.61 1139.09
   5 -13   311081.42 1056.04
   5 -13   3 9181.98  754.19
  -5 -13  -310703.90 1030.58
   5 -13   4 1315.21  318.07
   5 -13   4 1016.18  551.30
  -5 -13  -4 1460.39  525.54
   5 -13   5  275.26  141.24
  -5 -13  -5  216.23  243.75
   5 -13   6 5246.71  406.74
   5 -13   6 6332.51  849.96
  -5 -13  -6 5764.58 1393.08
   5 -13   7 3742.02  505.39
  -5 -13  -7 2991.18  901.95
   5 -13   7 4628.68  666.83
   5 -13   8  313.06  391.97
   5 -13   8  568.08  345.43
   5 -13   9  150.91  247.56
   5 -13   9  253.15  225.91
   5 -13  10 2864.79  299.71
   5 -13  10 4883.91 1087.19
   5 -13  11 2601.43  993.98
   5 -13  11 3212.03 1004.28
   5 -13  12  773.34  334.52
   5 -13  12  903.00  374.65
   5 -13  13  130.55  163.58
  -5 -14  13  871.76  332.39
  -5  14  13  221.67  209.41
  -5 -14  12  466.76  376.62
  -5  14  12  552.33  429.55
  -5 -14  11 6055.77  787.70
  -5  14  11 3782.87 1110.00
  -5 -14  10  261.86  394.42
  -5  14  10  388.62  282.13
   5 -14  -9  248.86  257.84
  -5 -14   9  633.60  496.95
   5 -14  -8  555.94  398.60
  -5 -14   8  814.25  379.66
   5 -14  -7 9823.66 1137.36
  -5 -14   7 6808.13 2234.61
   5 -14  -6  609.11  310.61
   5 -14  -5  348.76  381.32
  -5 -14   5  814.61  516.31
   5 -14  -4  656.12  411.89
  -5 -14   4  403.46  161.71
   5 -14  -316496.06  764.10
   5 -14  -316040.95  995.57
  -5 -14   318248.21 1009.25
   5 -14  -2  -26.11  118.11
  -5 -14   2  152.65  463.81
   5 -14  -1  523.21  502.59
   5 -14  -1 2766.43  691.12
  -5 -14   1 1360.17  406.56
   5 -14   0  491.48  203.13
   5 -14   0 1656.98  683.59
  -5 -14   0  943.24  743.46
   5 -14   114239.00  822.53
   5 -14   112419.78 1255.68
  -5 -14  -112589.31  850.15
   5 -14   2   45.73  255.43
   5 -14   2  213.33  145.78
  -5 -14  -2  816.83  368.68
   5 -14   3 3957.07  721.45
   5 -14   3 3317.86 1041.08
  -5 -14  -3 2800.95  719.05
   5 -14   4   46.05  254.46
   5 -14   4   75.93  232.32
  -5 -14  -4  291.78  301.80
   5 -14   5 7989.72 1129.53
   5 -14   510974.76 2071.80
  -5 -14  -5 9380.49 1067.02
   5 -14   6  604.45  655.59
   5 -14   6  -39.02  181.11
  -5 -14  -6  161.72   90.48
   5 -14   7  446.37  236.63
   5 -14   7  683.09  414.00
   5 -14   8  442.77  522.40
   5 -14   9 7354.56 1183.06
   5 -14   9 8262.76 1254.67
   5 -14  10   34.03  197.64
   5 -14  10  397.40  380.98
   5 -14  11   -6.25  171.06
   5 -14  11  466.90  264.65
   5 -14  12  338.35  294.92
  -5 -15  12  796.05  311.99
  -5  15  12  237.81  193.43
  -5 -15  11 1033.13  320.72
  -5  15  11   49.38  246.95
  -5 -15  10 2811.52  478.79
  -5  15  10 3242.05  326.82
   5 -15  -9 1794.78  496.66
  -5 -15   9 1830.36  424.84
   5 -15  -8  232.91  239.01
  -5 -15   8  651.44  845.38
   5 -15  -7  900.76  359.26
  -5 -15   7  466.83  389.24
   5 -15  -6 6597.89  721.06
   5 -15  -5 4351.70 1379.92
  -5 -15   5 2204.48 1261.15
   5 -15  -4 6190.61  651.47
  -5 -15   4 8917.75 1120.26
   5 -15  -3  477.37  245.74
  -5 -15   3  497.73  434.14
   5 -15  -2 6021.59  736.86
  -5 -15   2 6840.87 1315.23
   5 -15  -1 6534.74 1493.84
  -5 -15   1 5348.33  673.87
   5 -15   0  514.21  436.23
  -5 -15   0 2119.73  601.77
   5 -15   1  260.15  236.41
  -5 -15  -1  307.86  155.58
   5 -15   2 6758.91 1354.70
  -5 -15  -2 5391.33 1350.09
   5 -15   3  840.26  682.39
  -5 -15  -3 2632.13  620.12
   5 -15   4  342.83  367.81
   5 -15   4 1040.79  543.98
  -5 -15  -4 1976.11  602.15
   5 -15   5  774.16  339.17
   5 -15   5  607.10  442.26
  -5 -15  -5 1303.94  350.81
   5 -15   6 1726.58  722.03
   5 -15   6 1505.04  490.60
  -5 -15  -6 2677.81  723.06
   5 -15   7  462.26  367.51
   5 -15   7 1978.19  669.03
   5 -15   8  257.62  397.14
   5 -15   8 1053.02  474.41
   5 -15   9  100.53  258.15
   5 -15   9  486.36  415.30
   5 -15  10 3215.80  844.56
   5 -15  10 4606.81 1280.88
   5 -15  11 1434.41  897.66
   5 -15  11 1922.30  828.31
  -5  16  12 3359.21  775.97
  -5  16  11  156.63  305.83
  -5  16  10  887.38  318.69
   5 -16  -9  -36.34  279.55
  -5 -16   9 -254.93  193.90
   5 -16  -8 2079.50 1283.42
  -5 -16   8 3642.83  857.86
   5 -16  -7 1258.16  462.77
  -5 -16   7 1208.99  882.19
   5 -16  -6  135.36  369.49
  -5 -16   6  570.95  721.45
   5 -16  -5  162.93  169.65
  -5 -16   5 1001.33  324.56
   5 -16  -4 4190.91 1048.79
  -5 -16   4 3986.37  786.40
   5 -16  -3  668.67  479.53
  -5 -16   3  275.57  523.78
   5 -16  -2 3806.75  746.74
  -5 -16   2 3096.58  595.77
   5 -16  -1  157.10  645.14
  -5 -16   1 1789.92  628.44
   5 -16   0 8647.46 1864.44
  -5 -16   0 7048.40  906.42
   5 -16   1  783.38  767.28
  -5 -16  -1  783.69  366.78
   5 -16   2 4639.41 1324.92
  -5 -16  -2 4679.14  809.65
   5 -16   3  608.52  371.13
  -5 -16  -3 1196.57  563.95
   5 -16   4 3630.64 1008.54
  -5 -16  -4 4532.95 1237.23
   5 -16   5  674.34  663.59
  -5 -16  -5  445.81  296.67
   5 -16   6 6514.43  923.97
   5 -16   7  608.83  419.96
   5 -16   9  254.72  475.86
  -5  17  10   11.50  161.05
   5 -17  -9 5205.83  732.87
   5 -17  -8 1153.88  938.80
   5 -17  -7 1759.55  927.81
   5 -17  -6 1049.09  437.03
  -5 -17   6  595.90  628.19
   5 -17  -5 7032.96 1890.82
  -5 -17   5 7852.17  578.06
   5 -17  -4  155.34  513.69
  -5 -17   4 1658.12  661.64
   5 -17  -3  208.00  121.68
  -5 -17   3  450.59  613.06
   5 -17  -2 1389.08  656.89
  -5 -17   2 1368.29  854.32
  -5 -17   1 4466.78 2109.22
   5 -17   0  451.94  241.50
  -5 -17   0  262.05  232.83
   5 -17   1  882.32  875.83
  -5 -17  -1  401.48  339.87
   5 -17   2 1950.44  820.86
  -5 -17  -2 1559.47  415.50
   5 -17   3 6938.03 1329.65
  -5 -17  -3 7722.45  842.64
   5 -17   4  765.83  536.80
  -5 -17  -4  190.06  172.80
   5 -17   5  712.86  326.30
  -5 -17  -5  114.40  197.17
   5 -17   6  347.68  240.07
  -5 -18   3 8638.07  970.91
  -5 -18   2  823.58  582.75
  -5 -18   1  276.28  262.11
  -5 -18   0  937.35  736.92
  -5 -18  -1 3394.59 1286.30
  -5 -18  -2 1724.05  591.14
  -5 -18  -3 1472.73  740.58
  -5 -18  -4  126.28  243.09
  -6   0  2014320.17 1296.91
  -6   0  19  844.84  424.59
  -6   0  18  173.26  312.09
  -6   0  18   97.90  150.08
  -6   0  17   95.08  166.51
  -6   0  17  128.31  215.55
  -6   0  1615081.06  973.76
  -6   0  1617356.01 1328.50
  -6   0  15  268.28  247.22
  -6   0  15  125.24  168.49
  -6   0  14  722.25  309.97
  -6   0  14  294.78  120.84
  -6   0  13  230.78  155.23
  -6   0  13  237.79  159.23
   6   0 -1215461.69 1176.93
  -6   0  1215036.72  941.07
   6   0 -11  183.48  262.19
  -6   0  11  153.68  185.66
   6   0 -10 1632.78  575.67
  -6   0  10 1222.45  325.89
   6   0  -9  378.82  199.10
  -6   0   9  175.47  231.46
   6   0  -820810.66 1057.67
  -6   0   817033.72 1315.83
   6   0  -7  -34.96  102.78
  -6   0   7  220.42  238.28
   6   0  -6 1878.19  469.47
  -6   0   6 2247.81  607.73
   6   0  -5    0.67   99.75
  -6   0   5  208.12  169.36
   6   0  -467790.32 2379.64
  -6   0   474814.49 2367.46
   6   0  -3  -42.07  223.41
  -6   0   3   29.92  213.34
   6   0  -213717.09  974.90
  -6   0   213219.10  843.82
   6   0  -1   43.24  257.80
  -6   0   1   97.08  164.55
   6   0   0114143.2 1251.75
  -6   0   0114425.7  994.26
   6   0   0111089.7 3343.90
   6   0   1  133.96  190.61
  -6   0  -1   32.99  129.61
   6   0   1   71.87  101.67
   6   0   226636.41  980.83
  -6   0  -224630.85  832.80
  -6   0  -224311.67  831.45
   6   0   3  308.42  252.60
  -6   0  -3   43.34   72.32
  -6   0  -3  284.58   86.64
   6   0   416045.96  955.28
  -6   0  -417531.76  947.52
   6   0   5  -31.59  177.13
  -6   0  -5   -4.69   35.08
  -6   0  -5   77.18  115.19
   6   0   6  600.79  476.59
  -6   0  -6  140.64   59.93
  -6   0  -6  223.11  110.98
   6   0   7  104.89  263.12
  -6   0  -7   24.98   30.23
  -6   0  -7   16.56   23.56
   6   0   8 5364.57  569.69
   6   0   9  334.45  198.04
   6   0  10  254.33  331.92
   6   0  11  369.08  252.68
   6   0  1226205.82 1689.42
   6   0  13  270.62  236.81
   6   0  14  650.60  431.21
   6   0  15  170.05  158.12
   6   0  1611322.16  930.39
   6   0  17    8.52  234.34
   6   0  18  853.36  678.82
  -6  -1  20  127.29  275.48
  -6   1  20  224.26  328.88
  -6  -1  19  681.49  242.06
  -6   1  19  674.19  594.02
  -6  -1  18 2480.87  570.00
  -6   1  18 3975.32  794.27
  -6  -1  18 1863.53  663.59
  -6  -1  17 1950.03  895.14
  -6   1  17 5067.79  483.18
  -6  -1  17 5134.72  663.47
  -6   1  17 4164.35  779.64
  -6  -1  16  808.14  329.68
  -6   1  16  408.63  166.99
  -6  -1  16  354.67  207.80
  -6   1  16  310.91  176.56
  -6   1  15 8025.29 1047.78
  -6  -1  15 9535.74 1628.88
  -6  -1  15 8184.99 1096.25
  -6   1  15 9017.42  468.32
  -6  -1  1412634.95  932.23
  -6   1  1412305.84  919.29
  -6  -1  1413958.51 1057.68
  -6   1  1414907.27 1322.42
  -6  -1  1315600.07 1118.24
  -6   1  1313154.04 1136.49
  -6  -1  12  501.26  324.08
  -6   1  12  248.36  245.98
   6   1 -11 4596.39  931.03
  -6  -1  11 4780.51 1023.67
  -6   1  11 4314.24 1110.30
   6   1 -10 9227.56  803.82
   6  -1 -10 8338.61  880.28
  -6  -1  1010533.91  851.94
  -6   1  10 9228.99  709.81
   6   1  -9 8253.29  735.82
   6  -1  -9 8418.36  697.02
  -6  -1   9 8365.37 1036.46
  -6   1   9 8309.63  639.31
   6   1  -8  321.16  270.03
   6  -1  -8  -43.80  187.76
  -6  -1   8  619.33  245.67
  -6   1   8  266.76  196.18
   6   1  -712028.57  688.19
   6  -1  -712863.83  831.39
  -6  -1   712611.45  788.90
  -6   1   711299.24  841.82
   6   1  -617837.98 1087.23
   6  -1  -618106.65 1063.07
  -6  -1   619113.78 1556.00
  -6   1   619348.98 1272.04
   6   1  -542098.21 1724.89
   6  -1  -540677.72 1341.58
  -6  -1   540966.27 1353.67
  -6   1   539292.35 1329.70
   6   1  -4  138.63  170.97
   6  -1  -4  -21.34  230.72
  -6  -1   4  185.82  107.31
  -6   1   4 -224.37  208.36
   6   1  -312255.40  739.70
   6  -1  -312083.23  764.21
  -6  -1   311319.10  703.92
  -6   1   312851.75  773.25
   6   1  -221339.84 1352.00
   6  -1  -221247.80 1183.48
  -6  -1   219025.71 1060.56
  -6   1   220612.90 1281.06
   6   1  -1 9916.95  882.79
   6  -1  -1 9486.25  616.28
  -6  -1   1 9019.17  356.94
  -6   1   1 8310.82  673.24
   6   1   0 1935.38  630.25
   6  -1   0 2021.74  681.49
  -6   1   0 1506.11  340.80
  -6  -1   0  853.88  647.07
  -6   1   0 2562.56  569.70
   6   1   0 1212.22  278.68
   6  -1   121286.40 1208.34
  -6   1  -122193.77  822.59
  -6  -1  -120157.21 1216.20
  -6   1  -119242.37 1040.16
   6   1   118062.10 1028.58
   6  -1   219647.70 1127.51
   6   1   218280.82 1133.02
  -6   1  -219586.92 1073.85
  -6  -1  -221283.35 1163.74
  -6   1  -219378.43 1080.68
   6   1   219278.78 1033.85
   6  -1   3 5873.99  524.00
   6   1   3 5423.16  467.70
  -6   1  -3 6015.22  443.92
  -6  -1  -3 5868.35  419.34
  -6   1  -3 5012.29  365.61
   6   1   3 6198.70  419.00
   6  -1   4 9732.07  785.85
   6   1   4 9140.27  672.56
  -6   1  -4 8406.93  748.88
  -6  -1  -4 9559.93  680.83
  -6   1  -4 9875.66  664.30
   6  -1   514348.58  953.83
   6   1   515890.91 1072.70
  -6  -1  -513856.64  809.73
  -6  -1  -515705.19  941.20
  -6   1  -515837.87  921.62
   6  -1   622675.61  990.03
   6   1   620707.63  987.94
  -6  -1  -620013.85  705.30
  -6   1  -620010.11  739.17
  -6  -1  -621714.08  766.26
  -6   1  -622116.53  804.21
   6   1   7 5950.49  795.92
   6  -1   7 4632.62  452.26
  -6   1  -7 4564.54  358.07
  -6   1  -7 5621.45  351.67
   6   1   8   32.05  188.96
   6  -1   8  165.93  232.83
  -6   1  -8  147.41   44.63
  -6   1  -8  118.19   50.99
   6   1   911004.17  932.33
   6  -1   911438.46  987.78
   6  -1  10 2883.75  356.51
   6   1  10 2302.36  765.02
   6  -1  1113344.65 1128.72
   6   1  1111052.08 1121.84
   6   1  12  868.20  252.20
   6  -1  12  666.94  698.03
   6   1  13 3439.25  984.89
   6  -1  13 3179.72  749.80
   6   1  14 3533.84  975.99
   6  -1  14 2817.76  910.35
   6   1  15 4142.33  736.52
   6  -1  15 5097.44 1000.50
   6   1  16  551.11  390.30
   6  -1  16  640.96  603.57
   6  -1  17 1257.63  769.88
   6   1  17 1143.71  544.59
   6   1  18  753.82  577.26
   6  -1  18  249.72  324.21
  -6  -2  20  592.80  359.74
  -6   2  20  322.99  249.67
  -6  -2  19  822.09  423.04
  -6   2  19  565.93  254.92
  -6  -2  18  268.98  385.86
  -6   2  18  736.57  430.25
  -6  -2  18  250.03  239.79
  -6   2  17 6185.61  614.10
  -6   2  17 7566.22  900.70
  -6   2  16   17.16  122.37
  -6  -2  16  505.10  293.37
  -6   2  16  826.63  242.33
  -6   2  15 6038.40  839.98
  -6  -2  15 5566.69 1459.47
  -6   2  15 7006.93  520.08
  -6  -2  14  248.23  253.56
  -6   2  14  515.79  297.85
  -6  -2  14   84.96  173.52
  -6   2  14  196.21  238.84
   6  -2 -13  718.81  477.04
  -6  -2  13  886.93  394.05
  -6  -2  13 1016.39  308.14
  -6   2  13  665.04  296.38
   6  -2 -12 1720.66  714.42
  -6  -2  12 1574.58  523.15
  -6  -2  12 2065.36  321.59
  -6   2  12 1989.24  636.40
   6   2 -11 3030.11  868.76
   6  -2 -11 2477.00  689.08
  -6  -2  11 2466.01  993.92
  -6   2  11 2313.30  495.42
   6   2 -10  260.75  329.58
   6  -2 -10  183.08  290.55
  -6  -2  10  595.73  298.28
  -6   2  10  814.77  188.45
   6   2  -917166.73  995.79
  -6  -2   918455.46  907.81
  -6   2   918424.71  944.03
   6   2  -8 6235.59  701.78
  -6  -2   8 7543.41  869.43
  -6   2   8 6230.24  804.87
   6   2  -714766.91 1288.70
  -6  -2   716351.68 1046.43
  -6   2   714692.86 1289.98
   6   2  -6  628.48  312.11
   6  -2  -6  809.19  446.52
  -6  -2   6  826.38  317.15
  -6   2   6  897.09  334.06
   6   2  -5 5905.50  526.44
   6  -2  -5 4839.58  764.31
  -6   2   5 6158.38  605.36
   6   2  -4 3136.77  316.83
   6  -2  -4 3483.46  468.82
  -6   2   4 3019.59  330.95
  -6  -2   316128.77 1052.13
  -6   2   316118.29  924.79
   6   2  -2 9295.74  597.95
   6  -2  -2 8022.42  951.64
  -6  -2   2 9379.58  686.12
  -6   2   2 9535.64  806.39
   6   2  -1 3081.39  459.34
   6  -2  -1 3050.66  370.23
  -6  -2   1 2449.65  230.89
  -6  -2   1 3392.44  960.02
  -6   2   1 2506.49  292.24
   6   2   0 1196.39  262.64
   6  -2   0 1530.58  400.62
  -6  -2   0  873.16  130.33
  -6  -2   0 1359.81  392.04
   6   2   0  985.77  221.90
  -6   2   0 1184.33  346.44
   6   2   141849.74 1511.63
   6  -2   143648.43 1566.63
  -6  -2  -146286.88 1527.34
   6   2   140591.31 1329.35
  -6   2  -141672.93 1354.64
   6   2   2 7536.37  606.64
   6  -2   2 8342.30  791.28
  -6   2  -2 7437.72  787.37
  -6  -2  -2 6983.85  545.37
   6   2   2 6596.50  454.38
  -6   2  -2 6741.94  479.66
   6  -2   316651.46 1123.08
   6   2   315700.81  902.42
  -6   2  -315995.87 1082.71
  -6  -2  -317118.03  926.90
   6   2   316770.26  915.33
  -6   2  -315422.13  853.67
   6  -2   4 4936.27  455.58
   6   2   4 4512.66  592.42
  -6   2  -4 5633.37  695.63
  -6  -2  -4 5016.30  455.28
  -6   2  -4 5059.69  495.25
   6   2   4 4724.39  331.46
   6  -2   538541.10 1686.25
   6   2   537841.34 1486.90
  -6  -2  -541054.40 1416.84
  -6   2  -537995.60 1452.35
  -6  -2  -541762.40 1458.68
  -6   2  -543369.22 1593.89
   6  -2   6  113.50  200.72
   6   2   6  730.40  292.92
  -6  -2  -6  253.62   58.84
  -6  -2  -6  302.24   64.05
  -6   2  -6  290.75  206.14
   6   2   7 3047.67  331.41
   6  -2   7 2923.97  531.16
  -6   2  -7 2508.88  187.91
  -6   2  -7 3122.29  339.30
   6   2   8 4975.88  467.03
   6  -2   8 4453.84  712.69
  -6   2  -8 4276.09  300.08
  -6   2  -8 4134.77  199.23
   6   2   9 7336.15  674.25
   6  -2   9 8978.13  848.74
  -6   2  -9 8115.72  618.71
   6   2  10  121.42  296.59
   6  -2  10  256.56  188.34
  -6   2 -10    1.68   22.68
   6  -2  11 2251.22  339.75
   6   2  11 1963.97  811.83
   6  -2  12  460.14  405.07
   6   2  12  596.86  326.59
   6  -2  13 6421.52  522.57
   6   2  13 7797.38  878.06
   6   2  14  642.83  261.02
   6  -2  14  483.64  244.47
   6  -2  15 1757.26  723.90
   6   2  15 2785.63  732.44
   6  -2  16  693.61  445.32
   6   2  16  490.77  454.63
   6  -2  17 3259.50 1183.85
   6   2  17 3165.78 1349.86
   6   2  18  471.30  230.69
  -6   3  20  366.52  215.06
  -6  -3  19  299.25  231.80
  -6   3  19  543.03  309.25
  -6  -3  18 6117.95 1120.86
  -6   3  18 7088.55  844.90
  -6  -3  18 5304.13  959.37
  -6  -3  17  910.26  387.47
  -6   3  17  671.45  520.60
  -6  -3  17   18.37  232.93
  -6   3  17   81.68  291.90
  -6  -3  16  494.20  397.35
  -6   3  16  300.25   83.00
  -6  -3  16  680.31  366.74
  -6   3  16  337.74  255.01
  -6  -3  15  205.44  231.83
  -6   3  15  200.96  382.22
  -6  -3  15 1119.57  439.52
  -6   3  15  432.89  354.02
  -6  -3  1411741.00  997.77
  -6   3  14 6867.31 1721.02
  -6  -3  1411054.24 1194.02
  -6   3  1410726.47  829.72
   6  -3 -13  669.17  525.41
  -6  -3  13  379.99  239.39
  -6  -3  13  292.74  434.19
  -6   3  13 -127.84  168.43
   6  -3 -12  209.66  381.48
  -6  -3  12   33.76  171.46
  -6  -3  12  120.20  212.69
  -6   3  12  270.62  235.43
   6  -3 -11 9433.05  984.58
  -6  -3  11 8685.58  864.14
  -6  -3  11 9595.62 1116.43
  -6   3  11 9369.92  914.43
   6   3 -1024488.23 1820.59
   6  -3 -1020600.48 1531.69
  -6  -3  1024897.27 1518.66
  -6   3  1025160.32 1493.78
   6   3  -9  992.77  383.60
   6  -3  -9 1452.57  407.58
  -6  -3   9 1588.83  559.07
  -6   3   9 1125.55  441.60
   6   3  -8  205.68  368.63
   6  -3  -8  356.36  312.08
  -6  -3   8 1183.50  356.35
  -6   3   8  495.49  169.70
   6   3  -7 2716.64  797.90
   6  -3  -7 1191.43  901.15
  -6  -3   7 2085.22  747.24
  -6   3   7 2403.36  784.15
   6   3  -636653.02 1280.53
   6  -3  -632774.56 1414.35
  -6  -3   632365.88 1264.49
  -6   3   634178.03 1180.44
   6   3  -5 5733.10  508.79
   6  -3  -5 5828.84  506.71
  -6  -3   5 5217.75  436.87
  -6   3   5 5417.70  699.02
   6   3  -424903.87  861.96
  -6   3   424105.16 1133.79
   6   3  -3 2206.80  336.93
  -6  -3   3 3010.62  961.28
  -6   3   3 3023.09  870.73
   6   3  -260090.14 1922.57
  -6  -3   253882.12 1774.86
  -6  -3   259690.34 1943.89
  -6   3   256888.27 1846.70
   6   3  -1 3798.35  435.62
   6  -3  -1 2505.51  348.06
  -6  -3   1 2154.60  211.67
  -6  -3   1 3200.89  428.02
  -6   3   1 2948.98  377.25
   6   3   019964.72 1108.65
   6  -3   019848.50 1146.89
  -6  -3   021404.73 1149.58
  -6  -3   018890.72 1062.09
  -6   3   019386.32 1350.66
   6   3   110815.32  728.74
   6  -3   1 9143.42  703.35
  -6  -3  -1 9557.13  643.45
  -6  -3  -110511.69  728.68
   6   3   1 9761.33  664.78
  -6   3  -110427.53  709.46
  -6  -3  -249781.40 1517.45
   6   3   250711.46 1600.12
   6   3   3  227.46  169.16
   6  -3   3  184.02  237.11
   6  -3   3  115.53  107.82
  -6  -3  -3  187.01  120.62
   6   3   3  129.03  163.61
   6  -3   4 2144.02  273.95
   6   3   4 2772.51  264.96
   6  -3   4 2650.21  218.30
  -6  -3  -4 2187.94  470.71
   6   3   4 2345.44  139.05
   6  -3   5 7995.85  774.14
   6   3   5 8673.82  335.03
   6  -3   5 9144.88  669.96
  -6   3  -5 8206.68  791.79
  -6  -3  -5 7030.89  605.62
   6   3   5 8171.78  689.61
   6  -3   627653.91 1413.30
   6   3   629506.87 1272.53
  -6  -3  -629022.47 1140.39
   6  -3   629431.81 1280.74
  -6   3  -626640.80 1126.12
  -6  -3  -626886.76 1067.42
   6   3   734716.07 1928.48
   6  -3   732473.55 1903.54
   6  -3   735656.52 2036.71
   6  -3   8 3042.94  392.50
   6   3   8 4003.71  394.66
   6  -3   8 3421.43  324.42
   6   3   9  -13.91  146.22
   6  -3   9  209.89  203.63
   6  -3   9  177.87  159.95
   6   3  1015559.04  899.15
   6  -3  1016131.48 1343.89
   6   3  11 1773.37  429.08
   6  -3  11 1532.27  677.03
   6  -3  12  320.84  338.56
   6   3  12  276.35  176.18
   6  -3  13 1439.73  713.43
   6   3  13 2011.55  419.16
   6  -3  14 6053.73  736.84
   6   3  14 5932.89 1073.07
   6  -3  15 1642.49  989.80
   6   3  15 1548.40  538.34
   6  -3  16  438.97  316.35
   6   3  16  162.53  115.36
   6  -3  17  774.93  281.75
   6   3  17   24.77  281.67
   6   3  18 2737.83  560.78
  -6   4  20 3876.67  493.45
  -6  -4  19  787.89  527.45
  -6   4  19  586.90  417.61
  -6  -4  18  563.54  539.76
  -6   4  18  254.93  283.83
  -6  -4  18   85.88  117.11
  -6  -4  17  602.60  337.04
  -6   4  17  792.11  285.06
  -6  -4  17  457.06  267.11
  -6   4  17  106.51  124.55
  -6  -4  16 8000.83  796.93
  -6   4  16 7363.67  794.02
  -6  -4  16 6647.60 1017.89
  -6   4  16 8655.83  716.35
  -6  -4  15 1463.92  351.90
  -6   4  15 1084.40  399.07
  -6  -4  15  922.91  473.67
  -6   4  15  359.48  292.56
  -6  -4  14 1029.47  385.88
  -6  -4  14  942.63  540.72
  -6   4  14  583.20  581.96
   6  -4 -13 4831.42  532.79
  -6  -4  13 5664.29 1127.06
  -6  -4  13 6733.31 1134.09
  -6   4  13 6473.54  705.21
   6  -4 -1226653.87 1671.94
  -6  -4  1223973.87 1551.04
  -6  -4  1227312.92 2482.45
  -6   4  1222538.75 1335.09
   6  -4 -11 3777.83 1260.64
  -6  -4  11 2908.99  559.76
  -6  -4  11 4589.74 1017.13
  -6   4  11 3096.08  473.09
   6  -4 -10  310.76  357.01
  -6  -4  10  404.38  216.99
  -6  -4  10  642.88  326.64
  -6   4  10  759.60  274.78
   6   4  -9  351.82  183.59
   6  -4  -9  523.82  498.26
  -6  -4   9  552.93  320.68
  -6   4   9  167.44  331.18
   6   4  -825479.37 1500.21
   6  -4  -823763.63 1393.06
  -6  -4   826344.75 1554.51
  -6   4   826446.68 1250.71
   6   4  -7 4993.60  575.94
   6  -4  -7 5017.38  546.36
  -6  -4   7 5066.69  689.41
  -6   4   7 6218.87  673.17
   6   4  -6  443.20  338.73
   6  -4  -6 1427.32  389.33
  -6  -4   6  881.60  520.32
  -6   4   6  884.19  435.83
   6   4  -5 1240.34  257.32
   6  -4  -5 1379.25  529.44
  -6  -4   5 1767.38  485.81
  -6   4   5 1391.99  355.93
   6   4  -437930.58 1374.93
   6  -4  -437737.23 1282.35
  -6   4   437666.37 1241.42
   6   4  -3   80.70  111.41
   6  -4  -3  114.48  205.91
  -6  -4   3   -8.96  104.91
  -6  -4   3   66.93  156.03
  -6   4   3  605.67  203.32
   6   4  -2 3183.37  243.95
   6  -4  -2 3276.64  979.15
  -6  -4   2 3115.64  454.56
  -6  -4   2 3904.58  445.17
  -6   4   2 3554.66  426.25
   6   4  -1  505.05  218.60
   6  -4  -1  274.37  210.78
  -6  -4   1   54.17   63.51
  -6  -4   1  471.49  333.15
   6   4   024747.60  891.09
   6  -4   023461.66 1176.75
  -6  -4   024961.77  836.93
   6  -4   023789.07  886.54
  -6  -4   023878.44  925.73
   6   4   1 2575.03  191.34
  -6  -4  -1 3470.16  205.41
   6  -4   1 4256.86  574.21
  -6  -4  -1 3864.49  378.06
   6   4   2  537.13  264.31
  -6  -4  -2  411.60  214.76
   6  -4   2   51.02  252.10
  -6  -4  -2  830.38  235.19
   6   4   2  509.24  168.63
   6   4   3 1353.11  332.26
  -6  -4  -3 1195.38  157.39
   6  -4   3 1187.30  382.22
  -6  -4  -3 1507.04  311.14
   6   4   3 1517.47  160.64
   6   4   418560.53 1138.08
   6  -4   415144.89  972.05
   6  -4   419194.59  920.20
  -6  -4  -415639.23  984.40
   6   4   417293.41 1000.15
   6   4   5 3621.70  569.77
   6  -4   5 3843.52  989.18
   6  -4   5 3541.93  804.19
  -6  -4  -5 3094.91  244.02
   6   4   5 3021.01  152.98
   6  -4   6 1611.85  668.91
   6   4   6 1481.70  469.11
   6  -4   6 1093.58  388.92
  -6  -4  -6  784.02  174.33
   6   4   6  808.34  147.28
   6   4   7  121.12  153.88
   6  -4   7  167.78  187.55
   6  -4   7   51.73  147.09
   6   4   819986.41 1199.95
   6  -4   817892.96 1309.00
   6  -4   816824.70 1001.22
   6  -4   914590.15 1117.28
   6   4   910681.31 1082.36
   6  -4   911373.56  813.93
   6   4  10 1133.70  629.45
   6  -4  10 1076.30  358.23
   6  -4  10  527.96  314.59
   6   4  11 2347.01  805.60
   6  -4  11 2850.70  845.08
   6   4  1214528.93 1382.46
   6  -4  1210782.27 1706.95
   6  -4  13  506.95  210.03
   6   4  13  242.01  274.79
   6  -4  14 1223.42  318.24
   6   4  14  473.29  392.14
   6  -4  15  672.50  459.29
   6   4  15   58.28  172.58
   6  -4  16 4445.47 1022.80
   6   4  16 5325.50  896.09
   6   4  17  492.62  393.66
   6  -4  17  468.43  547.38
   6   4  18  134.99  270.34
  -6   5  20  335.06  312.52
  -6  -5  19 2093.84  983.94
  -6   5  19 4054.68  405.64
  -6  -5  18  386.99  316.38
  -6   5  18  764.22  335.48
  -6  -5  18   84.78  107.84
  -6  -5  17 4437.16 1342.94
  -6   5  17 3588.87  528.12
  -6  -5  17 4350.18  495.92
  -6   5  17 3364.02 1064.77
  -6  -5  16  837.15  576.00
  -6   5  16 1447.28  309.89
  -6  -5  16 1413.30  655.66
  -6   5  16 1131.80  331.01
  -6  -5  15 4224.57  510.15
  -6   5  15 5470.57  405.74
  -6  -5  15 4510.50  438.25
  -6   5  15 5220.60  410.86
   6  -5 -14 1454.48 1199.13
  -6  -5  14 1055.55  451.34
  -6  -5  14  675.92  591.76
  -6   5  14  712.43  380.87
   6  -5 -13 4501.89 1325.16
  -6  -5  13 3531.10  335.75
  -6  -5  13 2757.33 1009.68
  -6   5  13 3539.18 1078.05
   6  -5 -12 7616.50 1532.12
  -6  -5  12 7220.52  766.63
  -6  -5  12 7825.87 1421.79
  -6   5  12 6398.25 1274.51
   6  -5 -1120995.68 1451.71
  -6  -5  1119832.93 1435.05
  -6  -5  1120355.16 1339.46
  -6   5  1124696.21 1474.56
   6  -5 -10 6262.88  662.30
  -6  -5  10 6290.13  741.37
  -6  -5  10 5095.09 1552.09
  -6   5  10 6813.03  875.22
   6  -5  -924746.81 1505.51
  -6  -5   926376.45 1538.86
  -6  -5   926201.30 1574.17
  -6   5   926114.53 1540.69
   6   5  -8 1175.81  406.76
   6  -5  -8  581.79  450.19
  -6  -5   8 1750.15  532.42
  -6   5   8 1734.86  503.26
   6   5  -7 8790.43  666.79
   6  -5  -710018.01  773.11
  -6  -5   7 9162.17  770.71
  -6   5   7 9116.98  687.08
   6   5  -6 4571.35  543.00
   6  -5  -6 4917.20  810.51
  -6  -5   6 4718.77  523.65
  -6   5   6 6564.36  686.90
   6   5  -531186.10 1348.48
   6  -5  -532324.63 1305.32
  -6  -5   527495.75 1392.64
  -6   5   531489.78 1403.40
   6   5  -4 1991.43  299.29
   6  -5  -4 2408.49  359.19
  -6  -5   4 3972.49 1046.87
  -6   5   4 2698.08  831.84
   6   5  -324372.15  873.51
   6  -5  -326596.36  978.14
  -6  -5   322651.07 1213.39
  -6  -5   322546.09 1305.54
  -6   5   324491.45  959.00
   6   5  -2 6192.62  523.61
   6  -5  -2 5803.38  812.91
  -6  -5   2 6421.44  543.79
   6  -5  -2 7170.49  943.80
  -6  -5   2 5532.07  504.65
   6   5  -119479.08 1080.85
   6  -5  -121445.70 1236.40
  -6  -5   118740.08  995.95
   6  -5  -118638.21 1261.96
  -6  -5   121519.50 1233.65
   6   5   0  525.07  179.90
   6  -5   0  349.81  205.79
  -6  -5   0  329.93  157.62
   6  -5   0  490.62  189.34
  -6  -5   0  313.44  230.41
   6   5   1 6772.20  615.11
   6  -5   1 5757.13  498.73
  -6  -5  -1 5837.29  396.83
   6  -5   1 6510.40  641.26
  -6  -5  -1 4762.17  673.13
   6   5   2 1904.14  247.09
   6  -5   2 1561.37  602.69
  -6  -5  -2 1649.80  137.70
   6  -5   2 2039.00  405.63
  -6  -5  -2 1980.50  585.56
   6   5   3 9190.88  679.05
   6  -5   3 8333.86  453.36
  -6  -5  -3 8914.10  552.18
   6  -5   310068.19  718.05
  -6  -5  -3 9874.65  677.10
   6   5   3 8393.74  258.98
   6   5   4 3430.51  529.83
   6  -5   4 3161.82  329.55
   6  -5   4 2434.57  563.46
  -6  -5  -4 2895.50  258.43
   6   5   4 2547.69  229.32
   6   5   527695.14 1230.11
   6  -5   527211.28 1252.58
  -6  -5  -525603.92 1103.35
   6   5   528807.39 1164.66
   6   5   6  338.24  170.04
   6  -5   6  984.90  366.22
  -6  -5  -6  567.63  204.38
   6   5   6  434.70  136.63
   6   5   711488.79 1005.85
   6  -5   713121.06 1158.56
  -6  -5  -712986.11  673.70
   6   5   713166.08  674.73
   6   5   8 1172.08  337.12
   6  -5   8  706.70  287.64
   6  -5   9 3765.40  962.83
   6   5   9 2012.93  583.81
   6  -5   9 2665.49  351.15
   6  -5  10 1392.42  768.41
   6   5  10 2333.81  643.47
   6  -5  10 1450.92  474.34
   6   5  1115976.81 1005.86
   6  -5  1112725.19 1057.73
   6   5  12  273.95  222.61
   6  -5  12  152.93  300.87
   6   5  13  270.69  385.17
   6  -5  13  629.81  393.05
   6   5  14  248.86  263.57
   6  -5  14  167.00  144.29
   6   5  15 5744.87 1128.82
   6  -5  15 8007.16 1101.56
   6  -5  16   81.95  447.47
   6   5  16    3.24  147.88
   6   5  17 4475.87  557.27
  -6  -6  19 1016.37  550.53
  -6   6  19 1295.64  317.94
  -6  -6  18  243.02  442.37
  -6   6  18  136.73  147.08
  -6  -6  18  361.14  132.77
  -6  -6  17 1234.94  587.37
  -6   6  17 3004.72  842.24
  -6  -6  17  751.24  418.44
  -6  -6  16 1715.62 1265.63
  -6   6  16 2721.54  692.20
  -6  -6  16 2470.51  969.50
  -6   6  16 3187.77 1116.54
  -6  -6  15 3663.86  472.32
  -6   6  15 1971.20  487.10
  -6  -6  15 2241.71  878.91
  -6   6  15 2215.20  857.68
   6  -6 -14  304.20  373.06
  -6  -6  14  665.85  566.63
  -6  -6  14  165.48  181.09
  -6   6  14  158.73  174.29
   6  -6 -13  413.17  239.04
  -6  -6  13  594.54  401.13
  -6  -6  13  497.93  256.89
  -6   6  13  394.45  210.85
   6  -6 -1211452.96 1216.83
  -6  -6  1211023.44  610.96
  -6  -6  1211651.38  884.50
  -6   6  1212603.42  854.91
   6  -6 -11 9118.61 1044.91
  -6  -6  11 8575.56  789.50
  -6  -6  11 8898.16 1186.66
  -6   6  1111377.34 1202.93
   6  -6 -10  648.63  342.38
  -6  -6  10  -46.87  172.09
  -6  -6  10  315.76  142.10
  -6   6  10  359.92  161.20
   6  -6  -9 5992.04  782.99
  -6  -6   9 5492.59  383.15
  -6  -6   9 5896.02  857.15
  -6   6   9 7639.66  856.32
   6  -6  -826170.14 1611.39
  -6  -6   827474.03 1566.55
  -6  -6   828588.29 1676.55
  -6   6   827809.11 1601.29
   6  -6  -7 8587.49  687.02
  -6  -6   7 9586.08  720.68
  -6   6   7 8884.69  862.77
   6   6  -6  357.35  168.67
   6  -6  -6  333.21  357.48
  -6  -6   6  443.00  324.97
  -6   6   6  337.70  186.92
   6   6  -510970.88  758.26
   6  -6  -511950.78  844.30
  -6   6   511836.56  884.33
   6   6  -4 6833.65  734.14
   6  -6  -4 8292.39  795.70
  -6  -6   4 8956.30  723.38
   6   6  -3 4940.66  595.26
   6  -6  -3 5579.92  555.90
  -6  -6   3 5486.27  502.35
   6  -6  -3 6439.24  656.88
  -6  -6   3 5815.29  726.98
   6   6  -2  251.56  155.14
   6  -6  -2 -114.33  200.64
  -6  -6   2  243.94   80.72
   6  -6  -2  423.39  227.85
  -6  -6   2  626.02  306.39
   6   6  -1 1786.33  205.59
   6  -6  -1 1872.18  540.06
   6  -6  -1 1562.56  452.80
  -6  -6   1  987.00  170.55
   6   6   028976.52 1118.68
   6  -6   033783.68 1327.43
   6  -6   031482.80 1377.67
  -6  -6   028706.19 1202.22
   6   6   120405.16  819.96
   6  -6   119911.37  888.30
   6  -6   118511.35 1329.58
  -6  -6  -118911.70  654.15
   6   6   2  205.96  165.23
   6  -6   2  420.95  206.71
   6  -6   2  176.86  143.72
  -6  -6  -2  176.21   86.83
   6   6   3 2189.41  480.47
   6  -6   3 1614.49  579.76
   6  -6   3 1713.41  450.97
  -6  -6  -3 1886.93  667.20
   6   6   4 4899.71  554.80
   6  -6   4 4333.95  448.44
   6  -6   4 5726.51  859.65
  -6  -6  -4 3824.46  480.27
   6   6   512854.39  762.08
   6  -6   513740.94 1149.53
   6  -6   512281.88  839.74
  -6  -6  -512623.26  863.63
   6   6   511450.92  689.83
   6   6   6 2240.20  380.56
   6  -6   6 2115.17  935.58
   6  -6   6 1657.21  337.09
  -6  -6  -6 2298.78  396.16
   6   6   6 1651.98  219.57
   6  -6   7  361.28  354.67
   6   6   7 1000.53  197.36
   6  -6   7  404.91  142.34
  -6  -6  -7  448.06  171.36
   6   6   816121.11 1098.38
   6  -6   816801.79 1139.27
   6  -6   817090.44 1026.26
   6   6   9 7714.78  601.98
   6  -6   9 7984.05  699.19
   6  -6   9 7492.72  663.46
   6  -6  10 1802.72  279.47
   6   6  10 2559.83  270.04
   6  -6  10 2522.91  534.62
   6   6  11 5845.51  568.79
   6   6  12 3123.26  602.79
   6   6  13 1016.24  607.09
   6   6  14  128.31  270.14
   6  -6  14  262.08  344.77
   6  -6  15 1959.03  533.76
   6   6  15 1231.40  315.79
   6  -6  16 1601.06  614.30
  -6  -7  19  -58.19  209.37
  -6   7  19  684.75  234.35
  -6  -7  18 7169.18 1605.17
  -6   7  18 8771.93  526.62
  -6  -7  18 6150.31  886.31
  -6  -7  17  488.78  334.65
  -6   7  17  164.32  207.97
  -6  -7  17   52.95  250.99
  -6  -7  16  269.59  267.86
  -6   7  16  202.32  154.53
  -6  -7  16  188.53  330.49
  -6   7  16  277.80  228.27
  -6  -7  15  729.48  326.57
  -6   7  15   22.41  150.54
  -6  -7  15  377.60  395.60
  -6   7  15  135.31  255.36
   6  -7 -1415477.14 1385.89
  -6  -7  1416788.41 1171.98
  -6  -7  1417107.08 1091.65
  -6   7  1416903.56  835.29
   6  -7 -13  552.61  386.41
  -6  -7  13  471.11  318.88
  -6  -7  13  762.23  417.12
  -6   7  13  284.47  344.69
   6  -7 -12  323.56  505.52
  -6  -7  12  523.76  354.99
  -6  -7  12  531.26  304.21
  -6   7  12  482.19  172.69
   6  -7 -11  970.39  327.39
  -6  -7  11  922.12  495.03
  -6  -7  11 1264.02  450.52
  -6   7  11  548.82  307.79
   6  -7 -10 4529.77 1254.77
  -6  -7  10 4953.92  630.47
  -6  -7  10 5742.10  910.71
  -6   7  10 4977.42  489.15
   6  -7  -9 5216.97  778.30
  -6  -7   9 5105.41  569.41
  -6  -7   9 5573.44 1114.29
  -6   7   9 5182.86  561.53
   6  -7  -8 4243.43  779.46
  -6  -7   8 4115.42  700.83
  -6  -7   8 2783.28  389.43
  -6   7   8 5508.84 1304.32
   6  -7  -7  219.88  182.82
  -6  -7   7  646.62  273.01
  -6  -7   7 1083.16  316.67
  -6   7   7  559.32  407.43
   6  -7  -620127.03 1210.73
  -6  -7   617706.47 1093.82
  -6  -7   618422.18 1210.01
  -6   7   620076.66 1195.10
   6  -7  -5  444.47  276.10
   6   7  -4  300.34  275.75
   6  -7  -4  496.85  311.43
  -6  -7   4  123.50  268.28
   6   7  -3  347.10  136.76
   6  -7  -3  164.61  202.99
  -6  -7   3  254.58  119.27
   6  -7  -3  375.20  400.18
  -6  -7   3  -12.88  181.37
   6   7  -244219.59 1584.87
   6  -7  -246029.14 1782.94
   6  -7  -243477.87 1833.21
  -6  -7   243394.98 1720.43
   6   7  -1   72.32   75.60
   6  -7  -1  200.42  202.42
  -6  -7   1   -5.19   34.36
   6  -7  -1  114.37  202.20
  -6  -7   1  657.72  328.70
   6   7   0 1873.52  275.31
   6  -7   0 1465.46  870.67
  -6  -7   0 1677.21  158.02
   6  -7   0 1504.61  760.33
  -6  -7   0 2022.86  542.73
   6   7   1  400.12  123.17
   6  -7   1  712.16  464.72
  -6  -7  -1  297.94  106.09
   6  -7   1  165.42  176.81
  -6  -7  -1  187.12  159.12
   6   7   233907.64 1409.92
   6  -7   233291.06 1571.68
  -6  -7  -234270.56 1360.33
   6  -7   231543.56 1479.42
  -6  -7  -232971.55 1481.02
   6   7   3  177.57  107.12
   6  -7   3  161.80  240.16
  -6  -7  -3   96.76   90.23
   6  -7   3  299.42  390.21
  -6  -7  -3   74.89  163.59
   6   7   4  131.74  231.16
   6  -7   4  410.68  161.72
  -6  -7  -4  280.52  115.58
   6  -7   4  321.18  400.01
  -6  -7  -4  865.05  246.78
   6   7   5 2116.66  267.70
   6  -7   5 2349.22  775.31
   6  -7   5 2105.35  577.58
  -6  -7  -5 2213.49  540.31
   6   7   6 8657.02  761.60
   6  -7   612760.08 1216.85
   6  -7   611982.54  766.72
  -6  -7  -611138.67  890.18
   6  -7   7 1249.23  359.92
   6  -7   7  551.05  204.66
   6  -7   8  704.72  373.27
   6   7   8   51.34  122.47
   6  -7   8  141.73  130.56
  -6  -7  -8   -8.82   35.59
   6   7   9  261.17  153.04
   6  -7   9  314.69  378.04
   6  -7   9  229.10  124.96
   6   7  1010973.16  761.49
   6  -7  1011108.69 1033.57
   6  -7  1011411.84  777.25
   6   7  11   28.49  120.45
   6  -7  11  695.77  157.76
   6  -7  12  425.69  747.91
   6   7  12  685.91  223.35
   6  -7  13  432.60  444.41
   6  -7  1412448.30  883.57
   6  -7  15  427.58  466.71
   6  -7  16  215.93  255.23
  -6   8  19  844.16  295.05
  -6  -8  18  110.04  170.30
  -6   8  18   93.14  205.16
  -6  -8  18  345.29  159.91
  -6  -8  17 1558.76  783.85
  -6   8  17 1796.66  919.56
  -6  -8  17 1682.37  516.20
  -6  -8  16 2007.46  605.46
  -6   8  16 1285.41  581.50
  -6  -8  16 1080.34  578.58
  -6   8  16 2085.18  466.66
  -6  -8  15 1759.88  538.29
  -6   8  15 4377.25  612.52
  -6  -8  15 2649.80  810.20
  -6   8  15 2816.53  462.30
   6  -8 -14  360.45  166.84
  -6  -8  14  438.52  116.89
  -6  -8  14  245.72  342.51
  -6   8  14   -4.71   74.65
   6  -8 -13 9692.83 1171.01
  -6  -8  1310181.76  619.95
  -6  -8  13 9706.75  780.35
  -6   8  1310989.19  836.93
   6  -8 -12 5364.88  557.10
  -6  -8  12 6806.41  471.84
  -6  -8  12 5862.00  723.91
  -6   8  12 6934.18  677.00
   6  -8 -11 4689.84 1068.56
  -6  -8  11 4189.09  432.13
  -6  -8  11 4654.90  617.70
  -6   8  11 4594.28  470.42
   6  -8 -10 2166.01  940.32
  -6  -8  10 2502.91  720.41
  -6  -8  10 1140.65 1260.62
  -6   8  10 2955.45  331.57
   6  -8  -9  559.42  310.18
  -6  -8   9  317.88  169.56
  -6  -8   9  687.08  278.72
  -6   8   9  890.44  435.71
   6  -8  -8 9043.89  771.17
  -6  -8   8 7779.64  646.57
  -6  -8   8 7973.87  769.26
  -6   8   8 9002.14  838.88
   6  -8  -7 3581.53  470.32
  -6  -8   7 2964.42  290.05
  -6  -8   7 3093.08  407.44
  -6   8   7 3015.42 1033.43
   6  -8  -6  508.35  414.29
  -6  -8   6  623.61  318.52
  -6  -8   6  200.13  215.55
   6  -8  -5 4267.88  532.43
  -6  -8   5 4427.02  250.38
   6  -8  -5 5191.28  735.15
   6  -8  -4 4242.01 1098.58
  -6  -8   4 2847.53  414.08
  -6  -8   4 4150.23  260.38
  -6  -8   4 4467.52  763.75
   6  -8  -313391.63  929.42
  -6  -8   314363.94  954.06
   6  -8  -312016.85  913.51
  -6  -8   314020.20 1142.04
   6  -8  -2  490.19  258.28
  -6  -8   2  244.37  141.03
   6  -8  -2  501.84  297.26
  -6  -8   2  297.97  304.54
   6   8  -124081.76  982.86
   6  -8  -123411.97 1067.47
  -6  -8   125658.24 1038.12
   6  -8  -124898.41 1232.76
  -6  -8   123783.31 1185.86
   6   8   013086.28  826.27
   6  -8   010555.48  884.03
  -6  -8   012534.63  784.12
   6  -8   012601.60 1174.02
  -6  -8   014785.97 1075.89
   6   8   116973.63  911.59
   6  -8   117513.78 1049.78
  -6  -8  -116470.17  874.52
   6  -8   115688.50  669.52
  -6  -8  -114182.73 1040.20
   6   8   2 2292.68  135.51
   6  -8   2 2929.23  893.41
  -6  -8  -2 1860.83  102.59
   6  -8   2 2584.98  605.14
  -6  -8  -2 3124.67  871.06
   6   8   3 2795.30  187.69
   6  -8   3 3721.86  728.54
  -6  -8  -3 2237.05  159.80
   6  -8   3 3723.97  904.32
  -6  -8  -3 3183.85  631.26
   6   8   4 5952.65  249.15
   6  -8   4 6478.98  799.78
  -6  -8  -4 5601.46  245.69
   6  -8   4 6841.31  790.13
  -6  -8  -4 6591.48  767.61
   6   8   5 5813.45  267.11
   6  -8   5 5755.61  517.51
   6  -8   5 6448.50 1323.08
  -6  -8  -5 5702.95  382.68
   6   8   6 1982.83  411.57
   6  -8   6 1843.61  626.54
   6  -8   6 1721.92  570.53
  -6  -8  -6 1869.75  652.19
   6   8   7 6371.72  790.61
   6  -8   7 7154.08  698.42
   6  -8   7 5964.51  428.06
  -6  -8  -7 6476.35  498.59
   6   8   8 6008.09  444.00
   6  -8   8 5410.79 1481.09
   6  -8   8 5503.29  610.58
   6  -8   9 8373.08 1104.30
   6   8   9 6144.98  319.47
   6  -8   9 7031.53  632.11
   6  -8  10  335.32  205.49
   6  -8  10  141.65   87.18
   6  -8  11 2410.15  884.41
   6  -8  11 2547.94  540.84
   6  -8  12 6463.25 1111.36
   6  -8  13 2313.20  882.20
   6  -8  14  721.83  549.71
   6  -8  15  765.90  383.07
  -6  -9  18 1247.90  305.12
  -6   9  18  480.88  454.42
  -6  -9  18  987.69  527.42
  -6  -9  17 2299.37  760.68
  -6   9  17 1679.96  554.51
  -6  -9  17 1420.37  727.06
  -6  -9  16  317.53  321.62
  -6   9  16  296.28  292.35
  -6  -9  16  676.60  454.33
  -6  -9  15 3775.00 1440.57
  -6   9  15 5107.32  486.89
  -6  -9  15 4447.24  635.59
  -6   9  15 4096.86  877.18
   6  -9 -14  121.87  276.67
  -6  -9  14 1103.43  677.60
  -6  -9  14  261.89  221.55
  -6   9  14  590.46  261.35
   6  -9 -13 5513.55 1340.72
  -6  -9  13 4993.99  485.95
  -6  -9  13 4421.47 1132.37
  -6   9  13 4320.89  743.82
   6  -9 -12  447.00  475.04
  -6  -9  12  517.57  190.39
  -6  -9  12  827.90  409.59
  -6   9  12  260.39  283.19
   6  -9 -11 9297.26  541.02
  -6  -9  11 9743.15  496.50
  -6  -9  1110280.47 1735.03
   6  -9 -10  297.87  233.33
  -6  -9  10   25.81  160.58
  -6  -9  10  358.79  449.01
  -6   9  10  385.94  167.29
   6  -9  -9 9692.65  766.58
  -6  -9   9 8534.60  643.56
  -6  -9   9 9692.38 1680.58
  -6   9   9 8336.95  803.15
   6  -9  -8 1157.43  440.96
  -6  -9   8 1301.59  512.55
  -6  -9   8  614.40  507.97
  -6   9   8  864.37  612.07
   6  -9  -719046.70 1180.17
  -6  -9   716739.58 1046.08
  -6  -9   718044.70 1197.48
  -6   9   719856.26 1669.62
   6  -9  -6   23.36  142.40
  -6  -9   6  231.43   80.63
   6  -9  -6  407.54  356.53
  -6  -9   6  594.68  280.35
   6  -9  -5 4379.23  308.52
  -6  -9   5 4277.89  344.27
   6  -9  -5 5241.42  658.10
  -6  -9   5 3734.89 1388.38
   6  -9  -4  701.70  242.95
  -6  -9   4  247.01  175.20
  -6  -9   4  733.53  301.57
   6  -9  -315434.90  977.46
  -6  -9   313783.11  819.91
  -6  -9   314942.07  865.61
   6  -9  -316512.24 1114.54
  -6  -9   316172.07 1142.81
   6  -9  -2 1048.13  240.70
  -6  -9   2  561.78  167.07
  -6  -9   2  470.97  117.47
   6  -9  -2  195.26  233.79
  -6  -9   2  934.41  979.24
   6  -9  -141990.47 2305.71
  -6  -9   136435.08 1895.53
  -6  -9   138163.86 1988.60
   6  -9  -139543.87 2267.53
  -6  -9   138676.63 2623.18
   6  -9   0  251.43  179.44
   6  -9   0  360.85  272.52
  -6  -9   0  562.64  233.78
   6  -9   1 8357.68  742.35
   6  -9   1 8059.94  957.95
  -6  -9  -1 8197.67  918.71
   6  -9   2  807.10  310.68
   6  -9   2 1117.75  521.40
  -6  -9  -2 1083.89  502.88
   6  -9   312780.04  796.25
   6  -9   310657.92 1099.16
  -6  -9  -311900.23 1010.89
   6  -9   4 4505.43 1144.33
   6  -9   4 4642.56  801.20
  -6  -9  -4 3861.41  411.25
   6  -9   5 4739.42 1260.28
   6  -9   5 6827.18  686.38
  -6  -9  -5 5988.27  488.14
   6  -9   6  986.26  448.71
   6  -9   6 1162.62  532.83
  -6  -9  -6 1068.96  291.30
   6  -9   7 4463.44  458.22
   6  -9   7 4343.20  410.82
  -6  -9  -7 4257.81  706.71
   6  -9   8  217.37  334.40
   6  -9   8  266.35  199.53
   6  -9   9 6139.25  713.93
   6  -9   9 5129.31  498.89
   6  -9  10  395.23  355.73
   6  -9  10  131.40  127.67
   6  -9  1110636.22 1028.14
   6  -9  11 8329.84 1087.23
   6  -9  12  702.58  384.03
   6  -9  13  591.53  682.28
   6  -9  14  915.40  258.23
   6  -9  15 4315.90 1634.99
  -6 -10  18   61.45  141.96
  -6 -10  18  279.02  208.67
  -6 -10  17  165.72  240.82
  -6  10  17  108.91  158.90
  -6 -10  17   21.09  185.91
  -6 -10  16 4835.90  405.20
  -6  10  16 3475.56  297.12
  -6 -10  16 2731.23 1454.86
  -6 -10  15  780.89  457.10
  -6  10  15 1016.00  268.17
  -6 -10  15 1264.50  702.52
  -6  10  15  284.41  415.75
  -6 -10  14  432.61  290.62
  -6 -10  14  181.74  207.92
  -6  10  14  305.03  145.34
   6 -10 -13  420.61  464.39
  -6 -10  13 1522.09  565.11
  -6 -10  13  709.91  360.83
  -6  10  13  401.76  362.79
   6 -10 -12 8710.97 1129.61
  -6 -10  12 8014.22 1261.28
  -6 -10  12 8603.31 1022.87
  -6  10  12 8177.13  751.80
   6 -10 -11  206.78  297.59
  -6 -10  11  773.53  403.04
  -6 -10  11  567.63  226.75
  -6  10  11  368.22  434.45
   6 -10 -10  258.75  319.49
  -6 -10  10  330.89  197.35
  -6 -10  10  387.64  199.20
  -6  10  10   21.68  246.44
   6 -10  -9  380.31  223.18
  -6 -10   9  392.65  237.36
  -6 -10   9  147.92  257.34
  -6  10   9  447.73  173.25
   6 -10  -825799.42 1543.16
  -6 -10   826184.96 1478.36
  -6 -10   828603.26 1806.56
  -6  10   828823.00 1714.36
   6 -10  -7 6159.62 1053.39
  -6 -10   7 6126.14  329.18
   6 -10  -7 7592.29 1345.87
  -6 -10   7 5925.85  594.27
   6 -10  -6  304.79  173.68
  -6 -10   6  155.93  138.48
   6 -10  -6  658.83  383.48
   6 -10  -5  345.78  294.54
  -6 -10   5  415.07  122.30
   6 -10  -5  540.15  277.61
  -6 -10   5  622.06  366.71
   6 -10  -418197.85 1106.24
  -6 -10   415614.49  880.75
   6 -10  -414421.60 1262.67
  -6 -10   416375.11 1266.99
   6 -10  -3 1483.13  366.93
  -6 -10   3 1322.84  294.68
   6 -10  -3 1521.12  545.27
  -6 -10   3  392.91  601.53
   6 -10  -2  300.98  161.32
  -6 -10   2   95.50   59.51
   6 -10  -2  298.43  189.19
  -6 -10   2  383.52  294.45
   6 -10  -1  274.62  143.40
   6 -10  -1  101.95  200.09
  -6 -10   1  696.41  309.72
   6 -10   013149.97  828.64
   6 -10   013714.46  953.46
  -6 -10   015684.50 1151.89
   6 -10   1  502.59  291.44
   6 -10   1  462.02  527.53
  -6 -10  -1  393.20  229.04
   6 -10   2  276.36   73.42
   6 -10   2   44.61  200.23
  -6 -10  -2  294.62  219.49
   6 -10   3  290.34  310.95
   6 -10   3  312.09  280.85
  -6 -10  -3  711.30  396.39
   6 -10   418660.94 1103.76
   6 -10   424123.22 1378.70
  -6 -10  -418631.30 1171.83
   6 -10   5 4866.59  534.86
   6 -10   5 4325.47  886.19
  -6 -10  -5 4393.23  771.83
   6 -10   6  794.95  258.02
   6 -10   6 1376.20  458.59
  -6 -10  -6  555.11  500.63
   6 -10   7  155.39  262.84
   6 -10   7  452.18  221.97
  -6 -10  -7  110.16  154.20
   6 -10   812191.71 1284.07
   6 -10   8 9703.58  669.81
   6 -10   9  449.60  420.17
   6 -10   9  532.59  303.78
   6 -10  10  325.54  139.62
   6 -10  10  441.69  207.04
   6 -10  11  232.79  416.73
   6 -10  11  155.35  205.75
   6 -10  12 7211.85  949.38
   6 -10  13  468.17  435.65
   6 -10  14  702.42  373.12
  -6 -11  17 1279.81  419.41
  -6 -11  17  778.99  386.98
  -6 -11  16  418.17  235.28
  -6 -11  16  260.91  203.14
  -6 -11  15 1310.15  943.00
  -6 -11  15 2230.68  365.76
  -6  11  15 1454.79  423.53
  -6 -11  14 4952.33  884.64
  -6  11  14 4488.56  525.15
  -6 -11  14 5960.70  742.96
  -6  11  14 2678.52 1127.18
   6 -11 -13  219.70  265.37
  -6 -11  13  396.23  237.17
  -6 -11  13   95.15  302.13
  -6  11  13  157.35  134.30
   6 -11 -12  203.38  123.80
  -6 -11  12  139.25  229.87
  -6 -11  12  710.35  317.42
  -6  11  12 1140.81  614.74
   6 -11 -11 3899.31 1175.48
  -6 -11  11 3460.09  761.69
  -6 -11  11 2261.08  969.57
  -6  11  11 4689.01 1084.20
   6 -11 -1018264.40  903.04
  -6 -11  1017638.42  845.27
  -6 -11  1019695.26  928.90
  -6  11  1018380.44 1164.95
   6 -11  -9 5261.83  847.70
  -6 -11   9 2920.63  433.33
  -6 -11   9 3345.42  676.53
  -6  11   9 2730.08  857.52
   6 -11  -8  193.92  138.07
  -6 -11   8  278.73  181.16
  -6 -11   8  855.18  616.65
  -6  11   8  362.61  413.51
   6 -11  -7 3734.65  590.45
  -6 -11   7 3656.19  253.23
   6 -11  -7 4273.15 1402.17
  -6 -11   7 4534.09 1158.27
   6 -11  -6 7138.53  805.63
  -6 -11   6 6755.22  484.84
   6 -11  -6 6792.92  617.33
   6 -11  -5 3583.24  492.85
  -6 -11   5 3180.12  334.91
   6 -11  -5 3549.30 1007.24
  -6 -11   5 4530.89  941.41
   6 -11  -4  761.85  303.19
  -6 -11   4  165.18   63.21
   6 -11  -4  134.64  253.80
  -6 -11   4  791.39  393.17
   6 -11  -312279.77  793.57
   6 -11  -311213.45 1168.21
  -6 -11   315178.11 1011.41
   6 -11  -222380.25 1316.40
   6 -11  -224834.83 1427.70
  -6 -11   224997.85 1624.90
   6 -11  -1 1101.47  476.10
   6 -11  -1  774.52  314.30
  -6 -11   1  704.26  518.69
   6 -11   0  649.36  641.86
   6 -11   0  848.77  255.08
  -6 -11   0 1330.93  628.29
   6 -11   1  402.86  156.09
   6 -11   1  687.22  297.42
  -6 -11  -1  320.13  145.65
   6 -11   2 9406.31  755.32
   6 -11   210308.76 1307.19
  -6 -11  -210490.15  572.21
   6 -11   3 3738.80  393.86
   6 -11   3 4847.62  602.92
  -6 -11  -3 4788.69 1097.61
   6 -11   4  399.11  309.29
   6 -11   4  496.83  212.33
  -6 -11  -4  287.60  176.25
   6 -11   5 3622.03  376.77
   6 -11   5 2870.53  555.95
  -6 -11  -5 3083.88 1027.39
   6 -11   617377.34 1832.62
   6 -11   615677.87 1546.58
  -6 -11  -619738.95 1753.57
   6 -11   7 4280.92  921.99
   6 -11   7 4580.99  797.84
  -6 -11  -7 4034.18  310.33
   6 -11   8  520.07  301.93
   6 -11   8  214.38  233.30
   6 -11   9 1761.02  977.76
   6 -11   9 2012.14  543.34
   6 -11  10 8614.61 1178.90
   6 -11  10 8068.09 1179.03
   6 -11  11 1407.66  472.21
   6 -11  11 1754.54  484.59
   6 -11  12   80.19  297.18
   6 -11  13 1047.59  419.04
   6 -11  14 1031.65  440.07
  -6 -12  16   -6.85  189.45
  -6 -12  16  105.10  432.59
  -6 -12  15 1242.39  613.25
  -6 -12  15  449.35  268.31
  -6 -12  14  397.82  272.89
  -6 -12  14   -6.29  327.59
  -6  12  14  119.44  144.09
  -6 -12  13 1019.49  397.42
  -6 -12  13  717.52  513.78
  -6  12  13  429.33  212.81
   6 -12 -12  140.24  159.15
  -6 -12  12  608.17  333.90
  -6 -12  12 1021.48  995.04
  -6  12  12  351.27  305.58
   6 -12 -11 5877.81  580.71
  -6 -12  11 4487.57 1240.43
  -6  12  11 4496.79 1237.91
   6 -12 -10  -13.67  158.84
  -6 -12  10  345.19   99.58
  -6 -12  10  711.52  238.80
  -6  12  10  441.28  268.78
   6 -12  -9 8260.61  597.71
  -6 -12   9 5972.31 1210.06
  -6  12   9 7420.95  581.51
   6 -12  -8  217.84  139.26
   6 -12  -8  372.19  281.37
  -6 -12   8 1207.15  413.17
   6 -12  -7 2422.18  674.63
   6 -12  -7 2424.63  832.84
  -6 -12   7 3710.99 1467.89
   6 -12  -6  541.75  260.01
   6 -12  -6  176.19  362.28
   6 -12  -5  513.89  569.46
  -6 -12   5  251.14  186.24
   6 -12  -4  490.65  192.31
   6 -12  -4  298.86  321.63
  -6 -12   4  400.18  556.26
   6 -12  -310362.65  740.82
  -6 -12   311952.41  990.80
   6 -12  -2 1467.09  475.03
   6 -12  -2 1219.65  630.20
  -6 -12   2 2041.00  614.07
   6 -12  -110730.86  451.03
   6 -12  -111608.75 1548.88
  -6 -12   111322.33 1089.47
   6 -12   0  962.56  410.19
   6 -12   0  810.94  220.94
  -6 -12   0  820.44  324.26
   6 -12   1 6951.60  776.21
   6 -12   1 7403.20  742.60
  -6 -12  -1 7066.24  612.99
   6 -12   2  686.44  273.75
   6 -12   2  205.32  188.33
  -6 -12  -2  288.87  341.55
   6 -12   3 8664.99  646.10
   6 -12   3 7859.98 1545.38
  -6 -12  -3 7689.58  568.64
   6 -12   4  631.96  410.56
   6 -12   4  689.43  385.39
  -6 -12  -4  565.90  226.48
   6 -12   5 5099.20 1411.95
   6 -12   5 4955.02  438.11
  -6 -12  -5 6931.18  709.96
   6 -12   6  835.57  307.27
   6 -12   6 1295.55  524.00
  -6 -12  -6  775.57  524.29
   6 -12   7 3656.52 1060.13
   6 -12   7 3814.10  745.00
   6 -12   8  958.10  737.88
   6 -12   8 1425.53  475.24
   6 -12   9 3391.10 1366.73
   6 -12   9 3470.22  628.63
   6 -12  10  329.36  306.65
   6 -12  10  127.92  187.32
   6 -12  11 1674.10 1189.43
   6 -12  11 1848.85  781.80
   6 -12  12   99.11  292.29
   6 -12  13 2225.79  911.26
  -6 -13  14 2230.66 1064.98
  -6  13  14 3794.04  995.37
  -6 -13  13 1248.84 1122.28
  -6  13  13 2541.01  989.77
  -6 -13  12  508.14  413.12
  -6  13  12  434.48  184.48
  -6 -13  11 3572.55 1413.69
  -6  13  11 2922.68  735.15
  -6 -13  10 2166.00 1289.76
  -6  13  10 3277.76  393.52
  -6 -13   9 1850.53  917.28
  -6  13   9 1943.80  765.34
   6 -13  -8  235.99   94.29
   6 -13  -8  330.83  147.97
  -6 -13   8   71.09  252.51
   6 -13  -7 6935.30  569.28
   6 -13  -7 4745.46 1523.90
  -6 -13   7 5342.14  976.27
   6 -13  -6 3265.71  826.50
   6 -13  -6 5267.05 1314.04
  -6 -13   6 5242.73  531.66
   6 -13  -5 2713.79  945.39
   6 -13  -5 1868.77  699.46
  -6 -13   5 3260.30 1059.86
   6 -13  -4 2655.57  747.00
   6 -13  -4 2571.89  823.31
  -6 -13   4 3125.43 1287.22
   6 -13  -3 5901.56  381.84
  -6 -13   3 6680.52  676.80
   6 -13  -2 3571.01 1043.12
   6 -13  -2 3643.03 1125.41
  -6 -13   2 3474.44 1686.58
   6 -13  -1 3438.44  827.31
   6 -13  -1 2962.79  732.02
  -6 -13   1 4255.73 1150.41
   6 -13   0  779.18  299.50
   6 -13   0 1109.12  398.86
  -6 -13   0 2150.07  768.93
   6 -13   1 1346.39  598.50
   6 -13   1  739.25  254.58
  -6 -13  -1 1092.87  238.28
   6 -13   2 6903.29  437.45
   6 -13   2 5935.30  458.74
  -6 -13  -2 4956.93 1070.28
   6 -13   3 6599.62  575.81
   6 -13   3 7309.15 1571.36
  -6 -13  -3 7308.64  555.88
   6 -13   4  551.30  434.92
   6 -13   4  531.14  199.99
  -6 -13  -4  797.93  241.96
   6 -13   5  962.27  891.66
   6 -13   5 1947.50  699.20
  -6 -13  -5 2312.63  725.32
   6 -13   6 5282.48  603.88
   6 -13   6 5227.97 1008.45
  -6 -13  -6 5610.22  930.25
   6 -13   7 4974.72  719.23
   6 -13   7 5115.94 1109.23
   6 -13   8  580.42  246.52
   6 -13   8  261.79  190.86
   6 -13   9 3668.53  709.29
   6 -13   9 3092.44  903.46
   6 -13  10 1679.22  490.54
   6 -13  10  998.19  509.13
   6 -13  11 2263.04  830.19
   6 -13  11  699.08  452.84
   6 -13  12  252.18  191.22
  -6 -14  13  258.24  224.00
  -6  14  13  435.29  238.67
  -6 -14  12 4768.83 2324.79
  -6  14  12 4997.67 1410.18
  -6 -14  11  523.28  258.45
  -6  14  11   90.80  181.21
  -6 -14  10  241.06  238.08
  -6  14  10  332.11  286.21
  -6 -14   9 1603.45  706.05
  -6  14   9  302.38  348.52
   6 -14  -811084.48 1295.10
  -6 -14   810440.57 1226.91
   6 -14  -7  327.95  206.69
  -6 -14   7 1235.74  307.98
   6 -14  -6  489.20  510.33
  -6 -14   6 1104.37  819.11
   6 -14  -5 1098.58  859.38
  -6 -14   5  223.20  410.20
   6 -14  -414278.54 1086.25
   6 -14  -417718.09  796.72
  -6 -14   415288.08 1399.81
   6 -14  -3  187.11  157.56
   6 -14  -3  235.23  209.08
  -6 -14   3  605.51  310.78
   6 -14  -2  871.34  405.23
   6 -14  -2 1006.06  510.88
  -6 -14   2 1235.34  383.73
   6 -14  -1  270.13  245.65
   6 -14  -1  503.52  472.16
  -6 -14   1  477.92  268.76
   6 -14   011892.48  638.04
   6 -14   010681.35  720.89
  -6 -14   011872.14  908.20
   6 -14   1  164.61  186.11
   6 -14   1  195.20  270.58
  -6 -14  -1  429.65  495.34
   6 -14   2   56.82  130.77
   6 -14   2  646.15  355.45
  -6 -14  -2  213.56  249.20
   6 -14   3  127.73  134.45
   6 -14   3  239.53  242.38
  -6 -14  -3  235.81  401.60
   6 -14   4 9187.48 1046.41
   6 -14   4 9144.97 1864.37
  -6 -14  -4 7668.67  893.77
   6 -14   5  173.79  280.27
   6 -14   5  673.12  470.60
  -6 -14  -5  647.40  302.15
   6 -14   6 1092.43  721.22
   6 -14   6 2240.03  492.41
   6 -14   7  236.77  359.55
   6 -14   7 1062.64  301.79
   6 -14   8 9562.16 1023.93
   6 -14   8 9418.84 1917.25
   6 -14   9  103.85  186.61
   6 -14   9  360.86  226.47
   6 -14  10 1004.27  475.80
   6 -14  10  936.72  319.78
   6 -14  11  183.71  312.92
  -6  15  13  444.90  282.46
  -6  15  12  118.49  236.13
  -6 -15  11 2258.97 1191.09
  -6  15  11 2869.49  472.19
  -6 -15  10 1623.40 1002.86
  -6  15  10 4186.50  753.07
  -6 -15   9 2931.38 1203.49
   6 -15  -8  188.51  290.41
  -6 -15   8  889.26  721.10
   6 -15  -7 5713.31  875.03
   6 -15  -6 1493.55 1085.83
  -6 -15   6 1762.55  633.01
   6 -15  -5 4904.19  972.08
  -6 -15   5 7365.92 1076.82
   6 -15  -4  335.98  263.81
  -6 -15   4  543.18  423.21
   6 -15  -3 3231.47 1640.21
  -6 -15   3 3660.33 1550.33
   6 -15  -2 5249.23 1736.49
  -6 -15   2 3368.25  991.83
   6 -15  -1 3041.20  842.61
  -6 -15   1 3576.99 1040.05
   6 -15   0  121.02  174.73
   6 -15   0  925.29  297.27
   6 -15   1 5416.17 1009.49
  -6 -15  -1 3385.18 1399.26
   6 -15   2 1121.18  640.10
   6 -15   2 2031.00  591.06
  -6 -15  -2 1356.84  605.41
   6 -15   3 2095.56  723.56
   6 -15   3 2412.17  585.48
  -6 -15  -3  992.53  582.55
   6 -15   4   80.40  113.27
   6 -15   4  329.66  251.60
  -6 -15  -4  287.00  263.49
   6 -15   5 1438.02  429.56
   6 -15   5  321.20  288.38
  -6 -15  -5 1321.42  530.42
   6 -15   6  498.20  361.92
   6 -15   6 2104.28  913.87
   6 -15   7 2545.85  987.02
   6 -15   7 4437.78 1181.57
   6 -15   8  340.47  234.59
   6 -15   8  429.37  257.81
   6 -15   9  967.69  235.30
   6 -15   9 1168.96  561.27
   6 -15  10  289.39  363.73
   6 -15  10  729.11  542.72
  -6  16  11  368.98  376.33
  -6  16  10   33.26  164.07
  -6 -16   9  725.08  650.43
   6 -16  -8 1556.83  513.68
  -6 -16   8 1808.82 1337.92
   6 -16  -7  872.35  493.81
  -6 -16   7 2886.34  524.73
   6 -16  -6  248.63  542.91
  -6 -16   6 1388.40  946.47
   6 -16  -5 2925.57 1085.98
  -6 -16   5 3449.21  714.04
   6 -16  -4 1260.65  573.68
  -6 -16   4  988.22  469.67
   6 -16  -3 5941.08  807.39
  -6 -16   3 4000.56 1665.55
   6 -16  -2  157.72  247.57
  -6 -16   2  557.06  386.54
   6 -16  -1 7839.72  722.73
  -6 -16   1 8861.56  778.05
   6 -16   0 1551.07  710.05
  -6 -16   0 1719.47  364.58
   6 -16   1 6196.39 1613.73
  -6 -16  -1 3856.86 1700.71
   6 -16   2 1063.12  518.50
  -6 -16  -2  464.81  248.86
   6 -16   3 2159.04  634.06
  -6 -16  -3 1943.05 1091.60
   6 -16   4 1450.67  386.68
  -6 -16  -4  807.94  453.57
   6 -16   5 4366.22 1362.66
   6 -16   6  706.90  512.90
   6 -16   7 1249.26 1031.36
   6 -16   8 3070.57  818.68
   6 -17  -7  623.86  598.83
   6 -17  -6 4186.28 1555.95
  -6 -17   6 4495.87  918.46
   6 -17  -5  283.82  508.40
  -6 -17   5  830.36  753.74
   6 -17  -4  496.31  215.99
  -6 -17   4  795.04  586.50
   6 -17  -3  340.54  372.13
  -6 -17   3  717.51  252.73
  -6 -17   2 5169.69 1043.66
   6 -17  -1 1059.61  596.81
  -6 -17   1  260.57  488.95
   6 -17   0   97.75  257.06
  -6 -17   0  270.19  427.89
   6 -17   1  789.09  474.31
  -6 -17  -1 1138.46  511.08
   6 -17   2 6169.33  783.46
  -6 -17  -2 5739.44 1302.15
   6 -17   3  209.62  168.83
  -6 -17  -3  526.71  425.85
   6 -17   4  207.44  255.58
  -6 -18   2  178.92  205.72
  -6 -18   1 1554.73  312.30
  -6 -18   0  677.77  417.77
  -6 -18  -1 2461.87  955.70
  -6 -18  -2  261.33  287.00
  -6 -18  -3  511.58  272.42
  -7   0  20  327.53  389.61
  -7   0  19  877.58  535.08
  -7   0  18  275.39  217.60
  -7   0  18  255.15  165.48
  -7   0  17 9973.64 1122.41
  -7   0  17 7870.75  921.14
  -7   0  16    6.33  191.76
  -7   0  16   98.41  129.42
  -7   0  15  715.93  459.89
  -7   0  15  147.24  242.85
  -7   0  14  123.14  233.47
   7   0 -1331115.23 2271.18
  -7   0  1330852.35 1749.77
   7   0 -12  261.91  152.72
  -7   0  12  428.56  156.22
   7   0 -11 5326.28 1064.80
  -7   0  11 6878.15  866.78
   7   0 -10  529.31  251.12
  -7   0  10  181.20  200.36
   7   0  -914020.77 1028.56
  -7   0   914841.50 1055.22
   7   0  -8  130.55  277.40
  -7   0   8  175.83  110.68
   7   0  -711444.40  782.36
  -7   0   710544.19 1076.10
   7   0  -6  391.64  293.61
  -7   0   6   96.84  182.88
   7   0  -571775.48 2309.82
  -7   0   569942.41 2533.57
   7   0  -4  494.15  284.47
   7   0  -3 8871.70  675.90
  -7   0   3 7978.03  586.29
   7   0  -2   49.67  259.22
  -7   0   2  151.46  186.03
   7   0  -122551.14 1292.94
  -7   0   121424.21 1188.25
   7   0   0  -26.58  213.84
  -7   0   0 -160.09  162.51
   7   0   1 2575.19  480.59
  -7   0  -1 3002.64  745.71
   7   0   2  220.65  225.87
  -7   0  -2   -5.27  100.35
  -7   0  -2  -50.22  121.65
   7   0   338070.41 1349.38
  -7   0  -335822.52 1128.54
  -7   0  -335007.48 1145.58
   7   0   4   96.19  188.29
  -7   0  -4   92.60   45.48
  -7   0  -4  285.68  146.34
   7   0   5 4404.48  551.46
  -7   0  -5 4442.82  540.44
   7   0   6  297.50  248.48
  -7   0  -6   29.88   57.86
  -7   0  -6  221.49  112.77
   7   0   710518.43  799.43
  -7   0  -711264.42  639.01
  -7   0  -712246.81  697.71
   7   0   8  212.65  199.06
   7   0   9 9136.03  817.00
   7   0  10  183.90  409.03
   7   0  1124743.87 1899.27
   7   0  12  133.17  310.58
   7   0  13 3250.73 1149.45
   7   0  14  151.79  283.42
   7   0  1512240.94 1184.50
   7   0  16  148.72  209.52
   7   0  17  153.10  335.20
  -7   1  20 1603.51  567.56
  -7  -1  19  851.71  626.48
  -7   1  19 1320.87  296.72
  -7   1  18 4777.05  598.82
  -7  -1  18 4173.77  820.72
  -7   1  18 3359.98 1028.62
  -7  -1  17  890.18  444.77
  -7   1  17  537.40  421.10
  -7  -1  17  334.93  159.83
  -7   1  17  510.18  323.85
  -7  -1  16 3525.71  920.52
  -7   1  16 3469.07  912.09
  -7  -1  16 2858.64  376.32
  -7   1  16 3770.52  573.92
  -7  -1  15 9333.73  879.79
  -7   1  15 9994.37  609.09
  -7  -1  1511303.25 1326.13
  -7   1  15 9386.61  968.97
  -7  -1  14 5339.05  649.18
  -7   1  14 6202.53  930.64
   7  -1 -13 2659.12 1360.06
   7   1 -13  596.21 1112.11
  -7  -1  13 2659.23  639.07
  -7   1  13 2464.63  764.75
   7   1 -12 1315.51  627.13
   7  -1 -12  181.80  812.58
  -7  -1  12 1171.34  739.33
  -7   1  12 1224.33  501.24
   7   1 -11  116.87  134.86
   7  -1 -11  416.07  172.96
  -7  -1  11  213.89  204.74
  -7   1  11  348.86  380.43
   7   1 -10 1517.77  415.64
   7  -1 -10  773.20  667.83
  -7  -1  10 1444.71  538.73
  -7   1  10  942.45  739.17
   7   1  -9  324.35  262.14
   7  -1  -9  255.98  206.35
  -7  -1   9  312.55  345.88
  -7   1   9   64.51  155.60
   7   1  -8 8190.90  654.91
   7  -1  -8 7742.37  888.11
  -7  -1   8 8473.91  680.68
  -7   1   8 6737.19  545.81
   7   1  -7 3960.88  487.59
   7  -1  -7 3003.13  793.65
  -7  -1   7 3213.05  320.00
  -7   1   7 4261.89  537.50
   7   1  -623210.97 1269.65
   7  -1  -624672.14 1036.97
  -7  -1   624123.84 1016.65
  -7   1   626869.78 1088.83
   7   1  -5 3033.13  857.30
   7  -1  -5 1425.91  818.11
  -7  -1   5 2592.09  977.83
  -7   1   5 2622.09  702.19
   7   1  -4   45.56  200.10
   7  -1  -4  393.22  189.89
  -7  -1   4  287.85  225.90
   7   1  -318091.92 1363.03
   7  -1  -319425.61 1162.47
  -7  -1   317955.02 1089.77
  -7   1   316635.38  961.89
   7   1  -212228.54  916.50
   7  -1  -212656.42  781.36
  -7  -1   213737.90  846.61
  -7   1   210897.01  783.98
   7  -1  -1 8282.82  642.58
   7   1  -1 7395.74  696.18
  -7  -1   1 9610.00  794.34
  -7   1   1 8461.46  635.20
   7   1   0  913.22  335.30
   7  -1   0 1275.42  506.69
  -7  -1   0 1135.47  614.34
  -7   1   0 1182.45  268.73
   7  -1   124461.42 1098.88
   7   1   125101.66  943.70
  -7  -1  -122869.18  704.14
  -7   1  -125607.62  886.20
   7   1   219889.57 1134.51
[truncated: 327,935 more chars]
